# Supplementary material for: Correction of cognitive deficits in mouse models of Down syndrome by a pharmacological inhibitor of DYRK1A
Source: PubMed Central journal article supplement (PMC6176987; doi:10.1242/dmm.035634), 2018-09-27
Supplement: dmm-11-035634-s1.pdf [file dmm-11-035634-s1.pdf]

## SUPPLEMENTARY INFORMATION

### Correction of cognitive deficits in mouse models of Down syndrome by pharmacological inhibitor of DYRK1A

Thu Lan NGUYEN, Arnaud DUCHON, Antigoni MANOUSOPOULOU, Nadège LOAËC, Benoît VILLIERS, Guillaume PANI, Meltem KARATAS, Anna E MECHLING, Laura-Adela HARSAN, Emmanuelle LIMANTON, Jean-Pierre BAZUREAU, François CARREAUX, Spiros D. GARBIS, Laurent MEIJER and Yann HERAULT

#### Material and Methods

##### Synthesis of Leucettines L41, L43 and L99.

**Leucettine L41** was prepared as previously described (Debdab et al., 2011)

**Leucettine L43** ((5*Z*)-5-(3,4-Dihydro-2*H*-1,5-benzodioxepin-7-ylmethylidene)-2-phenylamino-3,5-dihydro-4*H*-imidazol-4-one). Prepared from 4 equivalents of aniline using the Monowave® 300 Anton-Paar apparatus (reaction time = 30 min., temperature = 140°C, P = 200 Watt) in 52% yield as yellow powder. Mp > 260°C. <sup>1</sup>H NMR (300 MHz, DMSO-*d*<sub>6</sub>): δ = 2.08-2.16 (m, 2H, CH<sub>2</sub>), 4.17 (t, 4H, *J* = 5.4 Hz, OCH<sub>2</sub>), 6.43 (s, 1H, =CH), 6.97 (d, 1H, *J* = 8.1 Hz, Ar), 7.07 (dd, 1H, *J* = 7.2, 7.2 Hz, Ar), 7.37 (dd, 2H, *J* = 8.4, 7.2 Hz, Ar), 7.61 (dd, 1H, *J* = 8.1, 0.9 Hz, Ar), 7.78 (d, 2H, *J* = 8.4 Hz, Ar), 7.85 (d, 1H, *J* = 0.9 Hz, Ar), 9.79 (br s, 1H, NH), 10.65 (br s, 1H, NH). <sup>13</sup>C NMR (75 MHz, DMSO-*d*<sub>6</sub>): δ = 31.4, 70.4, 114.1, 114.2, 119.4, 121.0, 121.5, 122.9, 123.2, 125.9, 128.9, 130.9, 138.8, 150.7, 151.0, 154.8, 170.5. HRMS, *m/z* = 336.1347 found (calculated for C<sub>19</sub>H<sub>18</sub>N<sub>3</sub>O<sub>3</sub>, [M+H]<sup>+</sup> requires 336.1347). Anal. Calcd for C<sub>19</sub>H<sub>17</sub>N<sub>3</sub>O<sub>3</sub>: C, 68.05; H, 5.11; N, 12.53. Found: C, 67.88; H, 4.88; N, 12.51.

**Leucettine L99** ((*Z*)-5-(4-hydroxy-3-methoxybenzylidene)-2-((4-(4-methylpiperazin-1-yl)phenyl)amino)-3,5-dihydro-4*H*-imidazol-4-one). Prepared from 1,1 equivalents of aniline using the Monowave® 300 Anton-Paar apparatus (reaction time = 30 min., temperature = 140°C, Pmax = 200 Watt) in 23% yield as green-yellow powder. Mp > 260°C. <sup>1</sup>H NMR (300 MHz, DMSO-*d*<sub>6</sub>) δ 2.22 (s, 3H, CH<sub>3</sub>), 2.46 (t, *J* = 5.2 Hz, 4H), 3.09 (t, *J* = 4.9 Hz, 4H), 3.86 (s, 3H, CH<sub>3</sub>), 6.39 (s, 1H), 6.78 (d, *J* = 8.1 Hz, 1H), 6.95 (m, 2H), 7.18 (dd, *J* = 8.6, 1.8 Hz, 1H), 7.68 (d, *J* = 8.6 Hz, 2H), 8.22 (d, *J* = 1.8 Hz, 1H), 9.47 (br s, 1H, NH), 10.51 (br s, 1H, NH). <sup>13</sup>C NMR (300 MHz, DMSO-*d*<sub>6</sub>) δ 46.22, 49.05, 55.10, 55.63, 113.41, 115.33, 115.76, 116.16, 120.81, 125.04, 127.74, 131.35, 138.72, 147.42, 147.90, 154.26, 170.81. HRMS, *m/z* = 408.2037 found (calculated for C<sub>22</sub>H<sub>26</sub>N<sub>5</sub>O<sub>3</sub>, [M+H]<sup>+</sup> requires 408.20356). Anal. Calcd for C<sub>22</sub>H<sub>25</sub>N<sub>5</sub>O<sub>3</sub>: C, 64.85; H, 6.18; N, 17.19. Found: C, 64.03; H, 6.02; N, 17.01.

##### Detailed rsfMRI analysis

All animal experiments were performed in accordance with the guidelines and ethics on animal experimentation established by the German and French laws (ethical allowance 35\_9185.81/G-13/15 from Regierungspräsidium Freiburg). Animal preparation, data acquisition and analysis were performed as described previously (Mechling et al., 2016). In brief, resting state magnetic resonance imaging (rsfMRI) was performed on 26 animals separated in 4 groups: wild type saline treated (Wild type – Saline); Wild Type – L41 treated mice; DP16 – Saline treated and DP16 – L41 treated. RsfMRI was carried out under medetomidine sedation (sc bolus injection, 0.3 mg per kg body weight in 100 µL 0.9% NaCl-solution right before the scan followed by continuous sc infusion of medetomidine (0.6 mg per kg body weight in 200 µL per hour) during scanning). The physiological parameters including body temperature, respiration rate, blood oxygen saturation and heart rate were continuously monitored to ensure stable and comparable imaging conditions for all animals. RsfMRI data was collected using single shot gradient echo EPI (TE/TR = 10 ms/1700 ms) at a 7 T small bore animal scanner (Biospec 70/20, Bruker, Germany) with a mouse head adapted cryocoil (MRI CryoProbe, Bruker, Germany). Following a shimming protocol, the whole mouse brain (excluding the cerebellum) was covered using

24 axial slices (0.7 mm slice thickness), with a field of view of  $1.92 \times 1.2 \text{ cm}^2$  and an acquisition matrix of  $128 \times 80$ . This resulted in a planar spatial resolution of  $150 \times 150 \mu\text{m}^2$ . 200 volumes were recorded with slice acquisition in interlaced fashion for each run. The preprocessing pipeline including coregistration with Allen mouse brain atlas (AMBA), creation of brain mask and smoothing with a Gaussian kernel of FWHM  $0.4 \times 0.4 \times 1 \text{ mm}^3$  was performed using MATLAB and SPM8 (<http://www.fil.ion.ucl.ac.uk/spm/>).

**Seed-based correlation analysis:** To evaluate the alterations of functional networks, several brain areas were selected as the regions of interest (ROIs). As all the data was normalized onto AMBA, each ROI was extracted using this atlas and used as seed region to perform FC analysis of the pre-processed rsfMRI data. Correlation coefficients were then computed (two-tailed t-test,  $p < 0.001$ ) between the seed region and the averaged time series of the remaining whole brain for each group and were converted to z values using Fisher's r-to-z transformation. Statistical evaluation of the impact of L41 treatment on the FC was performed via group two-tailed t-test ( $p < 0.01$ ), comparing wild type L41 treated animals versus saline treated wild type animals (WT L41 vs WT Sal) as well as DP16 - L41 treated animals versus Saline treated DP16 animals (DP16 L41 vs DP16 Sal). Included ROIs were: RSP: retrosplenial cortex to map the default mode network; CA1; Dentate gyrus; Perirhinal cortex and Anterior Cingulate area (ACC).

### Assay of recombinant protein kinases

Kinase activities for each enzyme were assayed in Buffer A (10 mM  $\text{MgCl}_2$ , 1 mM EGTA, 1 mM dithiothreitol, 25 mM Tris-HCl pH 7.5, 50  $\mu\text{g}$  heparin/mL) or Buffer B (50 mM  $\text{MgCl}_2$ , 90 mM NaCl, 30 mM Tris-HCl pH 7.4), with their corresponding substrates, in the presence of 15  $\mu\text{M}$  ATP in a final volume of 30  $\mu\text{L}$ . After 30 min incubation at  $30^\circ\text{C}$ , the reaction was stopped by harvesting, using a FilterMate harvester (Packard), onto P81 phosphocellulose papers (GE Healthcare) which were washed in 1% phosphoric acid. 20  $\mu\text{L}$  of scintillation fluid were added and the incorporated radioactivity measured in a Packard counter. Blank values were subtracted and activities calculated as pmoles of phosphate incorporated during the 30 min incubation. Controls were performed with appropriate dilutions of dimethylsulfoxide (DMSO). Kinase activities were expressed in % of maximal activity, i.e. in the absence of inhibitors.  $\text{IC}_{50}$  values were obtained from the dose-response curves.

*CDK1/cyclin B* (M phase starfish oocytes, native, affinity purified), *CDK2/cyclin E* (human, recombinant, from A. Echalier), *CDK5/p25* (human, recombinant, expressed in *E. coli*) were assayed in Buffer A (supplemented extemporaneously with 0.15 mg BSA/mL, except for CDK2) with 25  $\mu\text{g}$  of histone H1. *CDK9/cyclinT* (human, recombinant, expressed in insect cells) were assayed as described for CDK1/cyclin B, but using 8.07  $\mu\text{g}$  of CDK7/9-Tide (YSPTSPSYSPSPSYSPSPSKKKK). *DYRK1A, 1B, 2, 3* (human, recombinant, expressed in *E. coli* as GST (glutathione S-transferase) fusion proteins), and *CLK1, 2, 3, 4* (mouse, recombinant, expressed in *E. coli* as GST fusion proteins) were assayed in Buffer A (supplemented extemporaneously with 0.15 mg bovine serum albumin (BSA)/mL) with 1  $\mu\text{g}$  of RS peptide (GRSRRSRSRSR) as a substrate. *GSK-3 $\alpha/\beta$*  (glycogen synthase kinase -3, porcine brain, native, affinity purified on axin-sepharose beads), was assayed using a GSK-3 specific substrate (GS-1: YRRAAVPPSPSLSRHSSPHQpSEDEEE where pS stands for phosphorylated serine). *Pim1* (human, recombinant, expressed in *E. coli*) were assayed as described for DYRK1A with 25  $\mu\text{g}$  of histone H1 as a substrate. *Casein kinase 2 (CK2)* (human, recombinant, obtained from C. Cochet) was assayed in Buffer B, with 7.79  $\mu\text{g}$  of peptide substrate 29 (RRREDEESDDEE).

### CNR1 receptor antagonism assay

The DiscoverX PathHunter  $\beta$ -arrestin assay monitors the activation of a GPCR in a homogenous, non-imaging assay format using the Enzyme Fragment Complementation (EFC) technology with  $\beta$ -galactosidase ( $\beta$ -Gal) as the functional reporter. The enzyme is split into two inactive complementary portions (EA for Enzyme Acceptor and ED for Enzyme Donor) expressed as fusion proteins in the cell. EA is fused to  $\beta$ -Arrestin and ED is fused to the GPCR of interest, in this case the cannabinoid receptor CNR1. Dose-response curves were carried out on CNR1, in the presence of its agonist CP55940, for the three Leucettines L41, L43, L99 and  $\text{IC}_{50}$  values were determined. For antagonist assays, data was normalized to the maximal and minimal response observed in the presence of EC80 ligand and vehicle. An EC80 of 32 nM CP55940 was used. The effects of Leucettines are reported as % inhibition of fully activated CNR1 receptor by CP55940.

### DYRK1A and GSK-3 $\beta$ mRNA levels

Total mRNAs were isolated from mice Tg(*Dyrk1a*) and Ts65Dn brain tissues using the RNeasy Plus kit (Qiagen, Hilden, Germany) according to the manufacturer's protocol. Total RNA (727ng) was reverse transcribed by the SuperScript III first strand synthesis kit (#18080-051 Invitrogen) in accordance with the manufacturer's instructions. mRNA expression profiles were analysed by real-time quantitative PCR using SsoFast EvaGreen Supermix (#172-5204 Bio-Rad) in a CFX96<sup>TM</sup> Touch real-time PCR detection system (Bio-Rad). Primers used for the detection of *Gsk-3 $\beta$* , *Dyrk1a*, genes and housekeeping gene *Rplp0* are listed in Table (Eurofins, Ebersberg, Germany). The complete reactions were subjected to the following program of thermal cycling: 1 cycle of 30 seconds at 95°C; 50 cycles of 5 seconds at 95°C and 5 seconds at 59°C. A melting curve was run after the PCR cycles, followed by a cooling step. Each sample was run in triplicate in each experiment. Expression level of *Dyrk1a* is normalized to the expression level of *Gsk-3 $\beta$*  and *Tbp*.

| Gene                          | Forward primer                 | Reverse primer                |
|-------------------------------|--------------------------------|-------------------------------|
| <i>Gsk3<math>\beta</math></i> | 5'-agtgggtgagaagaagatgaggtc-3' | 5'-gagtgctgcttggtcgcac-3'     |
| <i>Dyrk1a</i>                 | 5'-tggggcagaggatataaccagt-3'   | 5'-gtcgaatagcaaggcataaggca-3' |
| <i>Rplp0</i>                  | 5'-cattgaatcctgagtgatgtgcag-3' | 5'-ggatgaccagcccaaggag-3'     |

### Phosphoproteomics, methods and analysis of results

**In-solution Proteolysis and iTRAQ labeling.** Specimens were vortexed in 0.5 M triethylammonium bicarbonate (TEAB), 0.05% sodium dodecyl sulfate (SDS) and pulsed probe sonicated (Misonix, Farmingdale, NY, USA). The resulting lysates were then centrifuged (16,000 g, 10 min, 4°C) and supernatants were measured for protein content using infrared spectrometry (Direct Detect, Millipore, Merck KGaA, Darmstadt, Germany). An equivalent of 100  $\mu$ g total protein from each specimen was subjected to reduction, alkylation, trypsin proteolysis and isobaric tags for relative and absolute quantitation (iTRAQ) labeling per supplier's specifications (ABSciex, San Jose, CA, USA). The following iTRAQ specimen labeling assignment was used: 113  $\cong$  Ts65 T control; 114  $\cong$  Ts65 T 41; 115  $\cong$  Ts65Dn control; 116  $\cong$  Ts65Dn 41; 117  $\cong$  Tg(*Dyrk1a*) T control; 118  $\cong$  Tg(*Dyrk1a*) T 41; 119  $\cong$  Tg(*Dyrk1a*) control, and 121  $\cong$  Tg(*Dyrk1a*) 41. The eight iTRAQ labeled specimens were pooled and lyophilized to dryness.

**Hydrophilic interaction chromatography (HILIC) Peptide Fractionation.** The pooled specimen was reconstituted in 100  $\mu$ L solution of 70% acetonitrile / 30% H<sub>2</sub>O with 10 mM formic acid and subjected to high-performance HILIC separation (150-mm  $\times$  2.1 mm ID, 2.6  $\mu$ m particle, Core-shell, Kinetex, Phenomenex, Torrance, CA, USA) at a flow rate of 200  $\mu$ L/min and column temperature at 35°C. The multi-step gradient separation scheme was as follows : 10 min isocratic at 100% mobile phase A (70% acetonitrile / 30% H<sub>2</sub>O with 10mM formic acid), linear gradient for 80 min to 40% mobile phase B (100% H<sub>2</sub>O, 10 mM formic acid), second linear gradient for 30 min to 95% mobile phase B, isocratic for 10 min at 95% mobile phase B and linear gradient for 10 min gradient to 5% mobile phase B. Fractions were collected in a peak dependent manner as recorded at 218 nm signal response. A total of 50 fractions were collected, lyophilized to dryness, and stored at -20 °C until LC-MS analysis.

**LC-MS analysis.** The LC-MS experiments were performed on the Dionex Ultimate 3000 UHPLC system coupled with the high resolution nanospray LTQ-FT-Orbitrap Elite mass spectrometer (Thermo Scientific, Bremen, Germany). Each peptide fraction was reconstituted in 30  $\mu$ L loading solution (2% acetonitrile, 0.1% formic acid) and a 10  $\mu$ L volume was loaded on the Acclaim PepMap 100, 100  $\mu$ m ID  $\times$  2 cm C18, 5  $\mu$ m particle, 100 Å pore) trapping column with the  $\mu$  PickUp Injection mode. The loading pump flow rate was 5  $\mu$ L/min and samples were loaded on the trapping column for 8 min. The analytical peptide separation was performed with low pH C<sub>18</sub> Reverse Phase capillary ultra performance liquid chromatography (Acclaim PepMap, 75  $\mu$ m ID  $\times$  50 cm, 2  $\mu$ m particle, 100 Å pore, San Jose, CA, USA) at a flow rate of 300 n /min and column temperature at 50°C retrofitted. The multi-step gradient elution scheme was as follows : Isocratic at 100% mobile phase A (2% acetonitrile, 0.1% formic acid) ; linear gradient for 120 min to 85% mobile phase B, (100% acetonitrile, 0.1% formic acid), Isocratic at 85% mobile phase B for 5 min, and 100% mobile phase A, in 10 min. Nanospray ionization of eluted peptides was performed with metal coated silica

emitters (FS360-20-10-D-20-C7, New Objective, Woburn, MA, USA). Gaseous phase transition of the peptides was performed with positive ion electrospray ionization applying a voltage of 2.5 kV. Top 7 multiply charged precursors within 350 -1900 m/z and intensity threshold 500 counts were selected with FT mass resolution of 120,000 and isolated for both CID and HCD fragmentation within mass windows of 2 and 1.2 Da respectively. Normalized collision energy was set at 35 for the CID spectra and 40 for the HCD spectra that were acquired with FT resolution of 15,000 within a m/z range of 100-1900. Already targeted precursors were dynamically excluded for further isolation and activation for 30 sec with 10 ppm mass tolerance.

**Protein Identification and Quantification.** All tandem mass spectra were submitted to Sequest search engine implemented on the Proteome Discoverer software version 1.4 for peptide and protein identifications. All spectra were searched against an updated UniProt Fasta file containing 20,200 human reviewed entries. The Sequest node for the HCD spectra included the following parameters: Precursor Mass Tolerance 10 ppm, Fragment Mass Tolerance 20 mmu, Dynamic Modifications were Oxidation of M (+15.995 Da), Deamidation of N, Q (+0.984 Da), Phosphorylation of S (+79.966 Da) and Static Modifications were iTRAQ8plex at any N-Terminus, K, Y (+304.205 Da) and Methylthio at C (+45.988 Da). The Fragment Mass Tolerance for the CID spectra was 0.5 Da while search for phosphorylation was not included. The level of confidence for peptide identifications was estimated using the Percolator algorithm with decoy database searching. Strict FDR was set to 0.01, relaxed FDR was set to 0.05 and validation was based on q-Value. The Reporter Ion Quantifier node included a custom iTRAQ 8plex (Thermo Scientific Instruments) Quantification Method, integration window tolerance of 10 ppm with Most Confident Centroid. Protein ratios were normalized to protein median and phosphorylation localization probability was estimated with the phosphoRS node. Only uniquely occurring peptides were used for protein relative quantification and peptides with missing iTRAQ channels were excluded.

**Phosphoproteomics analysis results.** A total of about 70 tryptic peptide fractions were analyzed from each brain region. Only phosphoproteins identified at  $\geq 99\%$  confidence (peptide FDR  $\leq 1\%$ ,  $q < 0.01$  based on decoy search) were accounted for. The cortex, cerebellum, and hippocampus regions reproducibly profiled a total of 1,199, 1,507, and 996 unique phosphoproteins, respectively. The mass spectrometry proteomics data have been deposited to the ProteomeXchange Consortium (<http://proteomecentral.proteomexchange.org>) via the PRIDE partner repository with the data set identifier PXD000XXX (Griss et al., 2013; Hermjakob & Apweiler, 2006; Csordas et al., 2013).

## References

- Csordas A, Wang R, Ríos D, Reisinger F, Foster JM, Slotta DJ, Vizcaíno JA, Hermjakob H, 2013. From Peptidome to PRIDE: public proteomics data migration at a large scale. *Proteomics* 13, 1692-1695.
- Debdab, M., Carreaux, F., Renault, S., Soundararajan, M., Fedorov, O., Filippakopoulos, P., Lozach, O., Babault, L., Tahtouh, T., Baratte, B., Ogawa, Y., Hagiwara, M., Eisenreich, A., Rauch, U., Knapp, S., Meijer, L. and Bazureau, J.P., 2011. Leucettines, a class of potent inhibitors of cdc2-like kinases and dual specificity, tyrosine phosphorylation regulated kinases derived from the marine sponge leucettamine B. Modulation of alternative pre-RNA splicing. *J. Med. Chem.* 54, 4172-4186.
- Griss J, Foster JM, Hermjakob H, Vizcaíno JA, 2013. PRIDE Cluster: building a consensus of proteomics data. *Nat Methods* 10, 95-96.
- Hermjakob H, Apweiler R, 2006. The Proteomics Identifications Database (PRIDE) and the ProteomExchange Consortium: making proteomics data accessible. *Expert Rev Proteomics.* 3, 1-3.
- Mechling AE, Arefin T, Lee HL, Bienert T, Reisert M, Ben Hamida S, Darcq E, Ehrlich A, Gaveriaux-Ruff C, Parent MJ, Rosa-Neto P, Hennig J, von Elverfeldt D, Kieffer BL, Harsan LA, 2016. Deletion of the mu opioid receptor gene in mice reshapes the reward-aversion connectome. *Proc Natl Acad Sci USA* 113, 11603-11608.

## Supplementary Figures

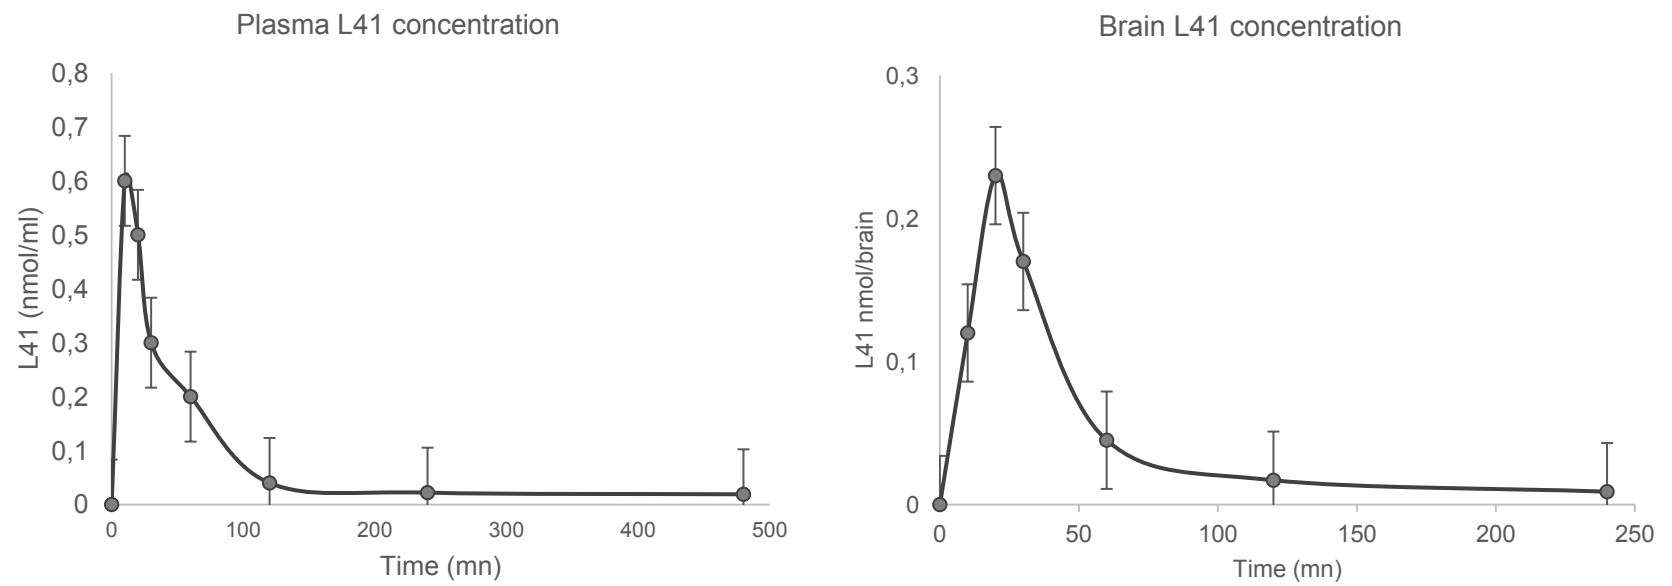

**Supl. Figure S1. Pharmacokinetics and brain biodistribution of L41 following acute intraperitoneal injection.** L41 concentration in the plasma and brain of Tg(*Dyrk1a*) and wt mice with a zoom on the first 8 hours.



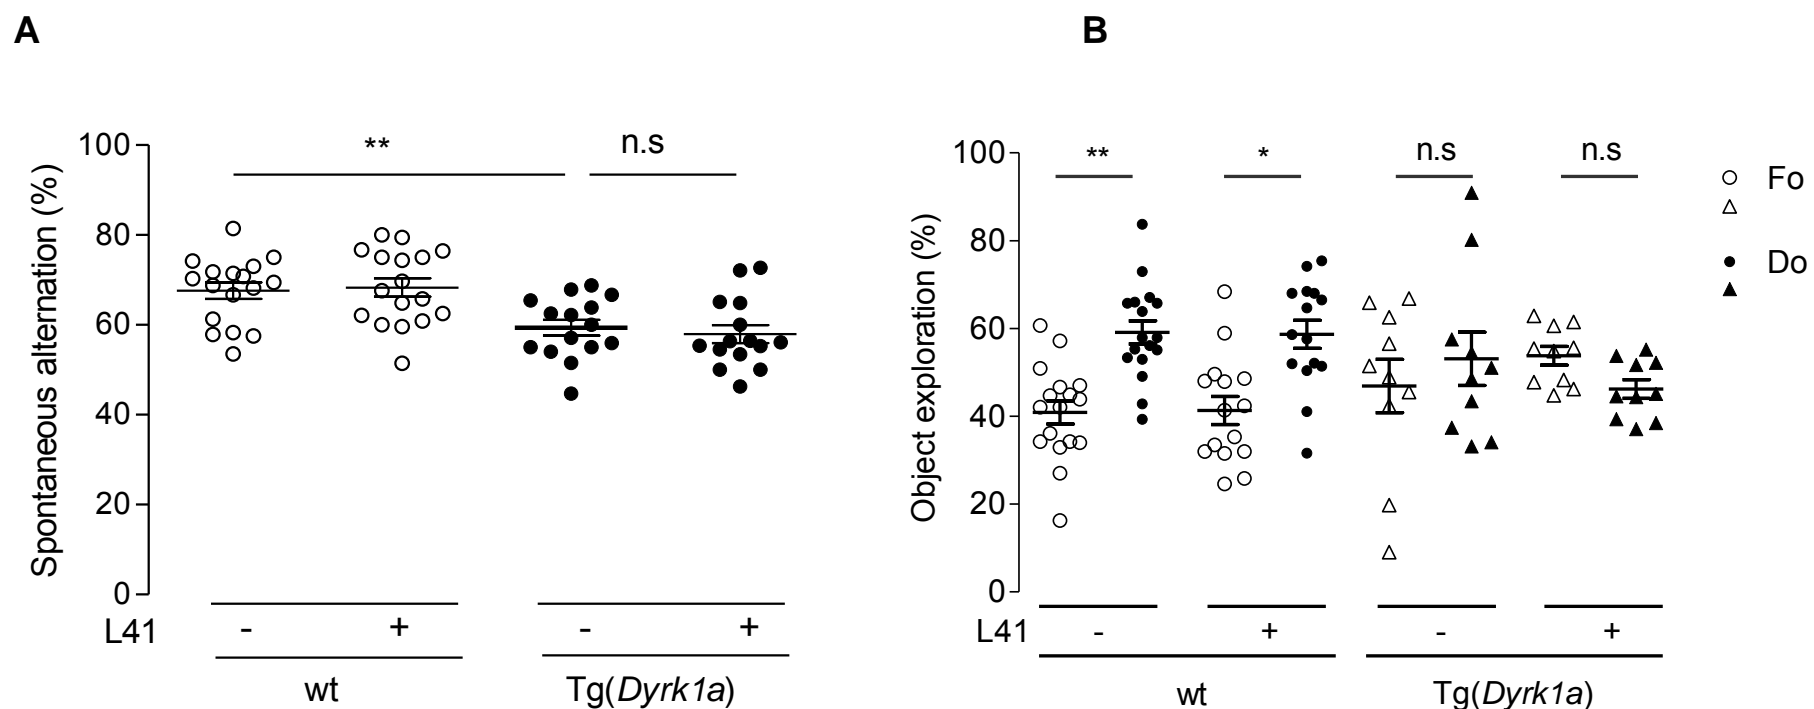

**Suppl. Figure S2. L41 treatment has no effect on the working and spatial memory of Tg(*Dyrk1a*) mice.** **A.** Y-maze results of a Tg(*Dyrk1a*) and control mice cohort treated or not with L41 (wt NT n=17; wt T n=17; Tg NT n=15; Tg T n=15). The percentage of spontaneous alternations is significantly decreased in the transgenic mice compared to controls treated or not with the L41 (p=0.003 and p=0.002 respectively). L41 treatment does not normalize the working memory deficit in Tg(*Dyrk1a*) mice (p=0.59). **B.** POR results of a cohort of Tg(*Dyrk1a*) and wt mice treated or not with L41. L41 treatment was unable to rescue the spatial memory impairment of the transgenic mice (wt NT n=17, 40% Fo and 60% Mo, p=0.003; wt T n=15, 41% Fo and 59% Mo, p=0.02; Tg NT n=10, 47% Fo and 53% Mo, p=0.62; Tg T n=10, 54% Fo and 46% Mo, p=0.11). Data are represented as mean  $\pm$  s.e.m. with individual points per animal. Statistical analysis was performed with the student test. n.s., not significant; \* p<0.05; \*\* p<0.01; \*\*\* p<0.001.

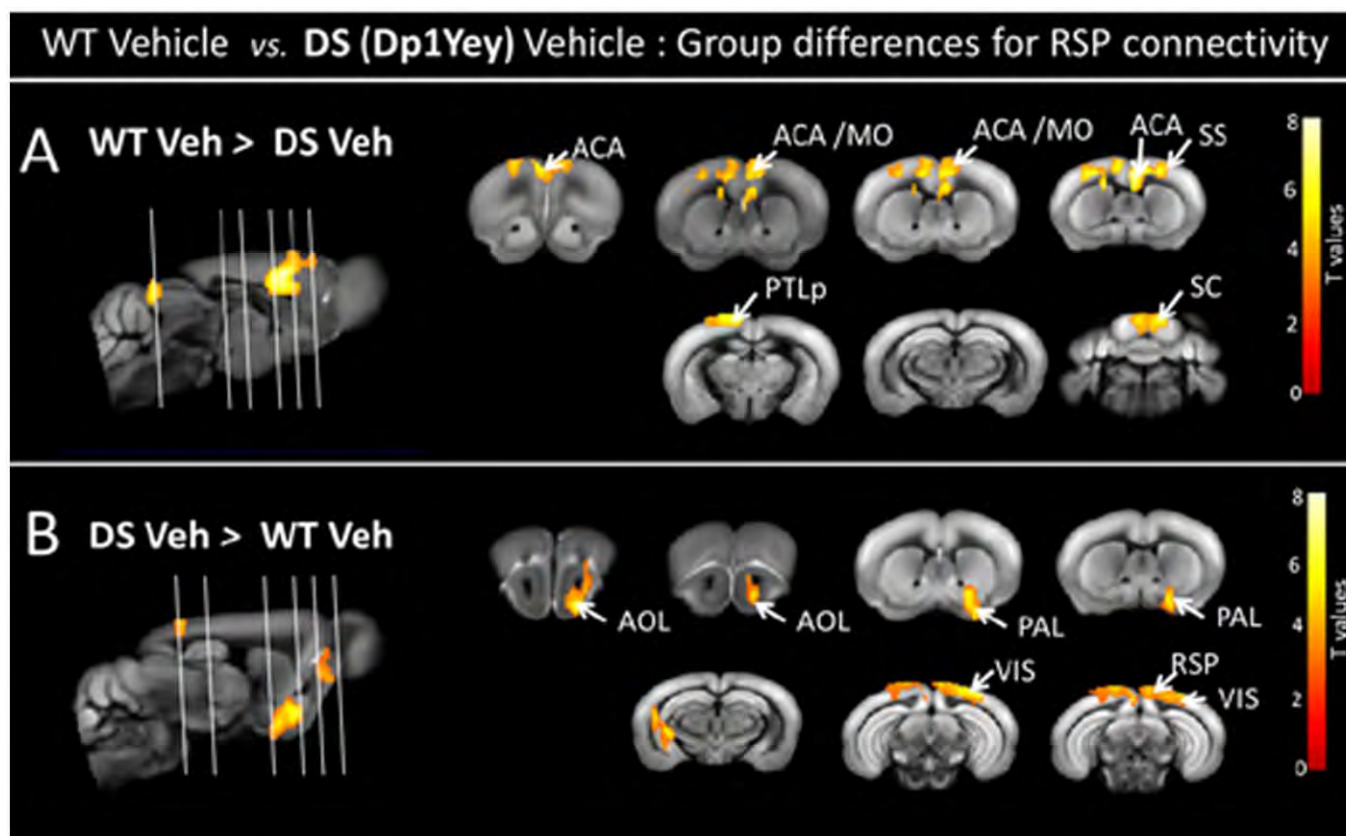

**Suppl. Figure S3. Group statistical differences in RSP connectivity (default mode network) between wt vehicle treated mice and Dp1Yey, DS mouse model.**

(A) Wt Vehicle animals display stronger long-range connectivity between RSP and fronto-cortical areas, including ACA, but also with parietal temporal areas and superior colliculus (WT Sal > DS Sal). (B) Dp1Yey mice show increased short-range local connectivity around RSP seed areas, but also increased pattern of connectivity with ventral striatum (PAL), limbic area (DS Sal > WT Sal).

**A**

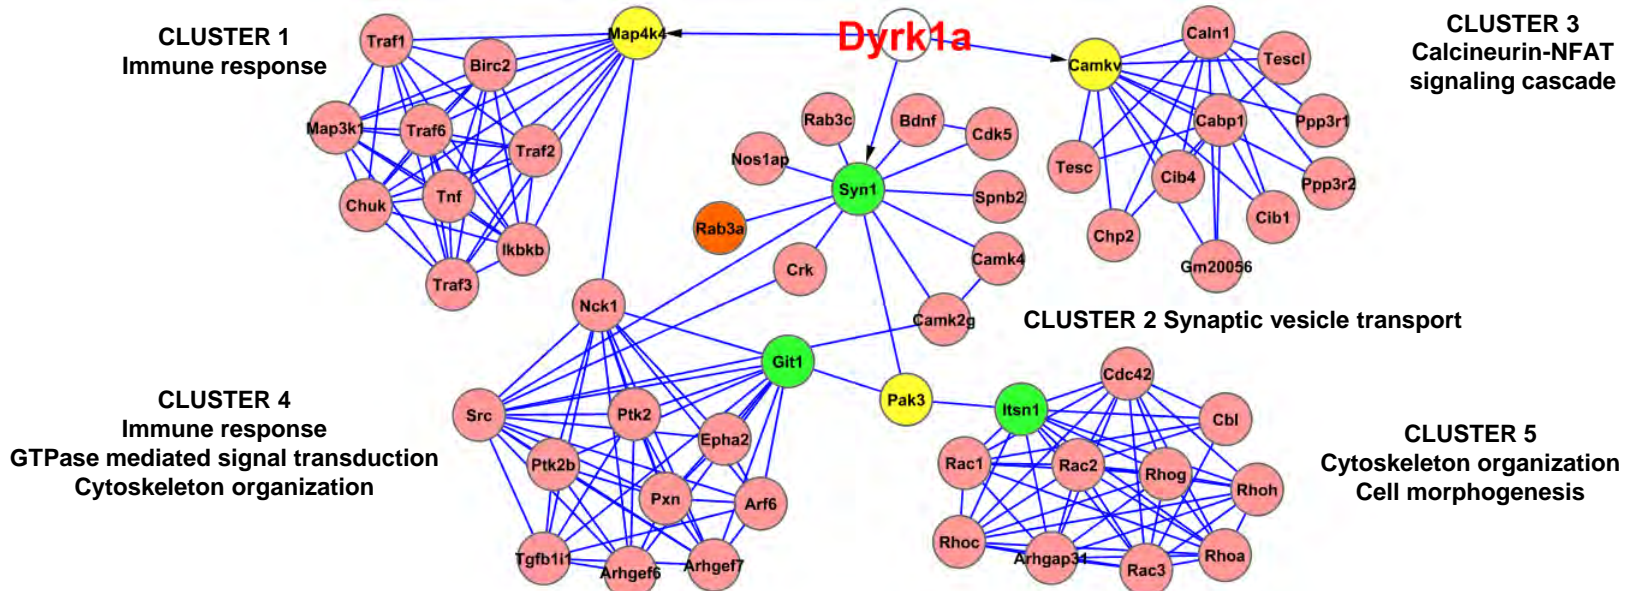

**B**

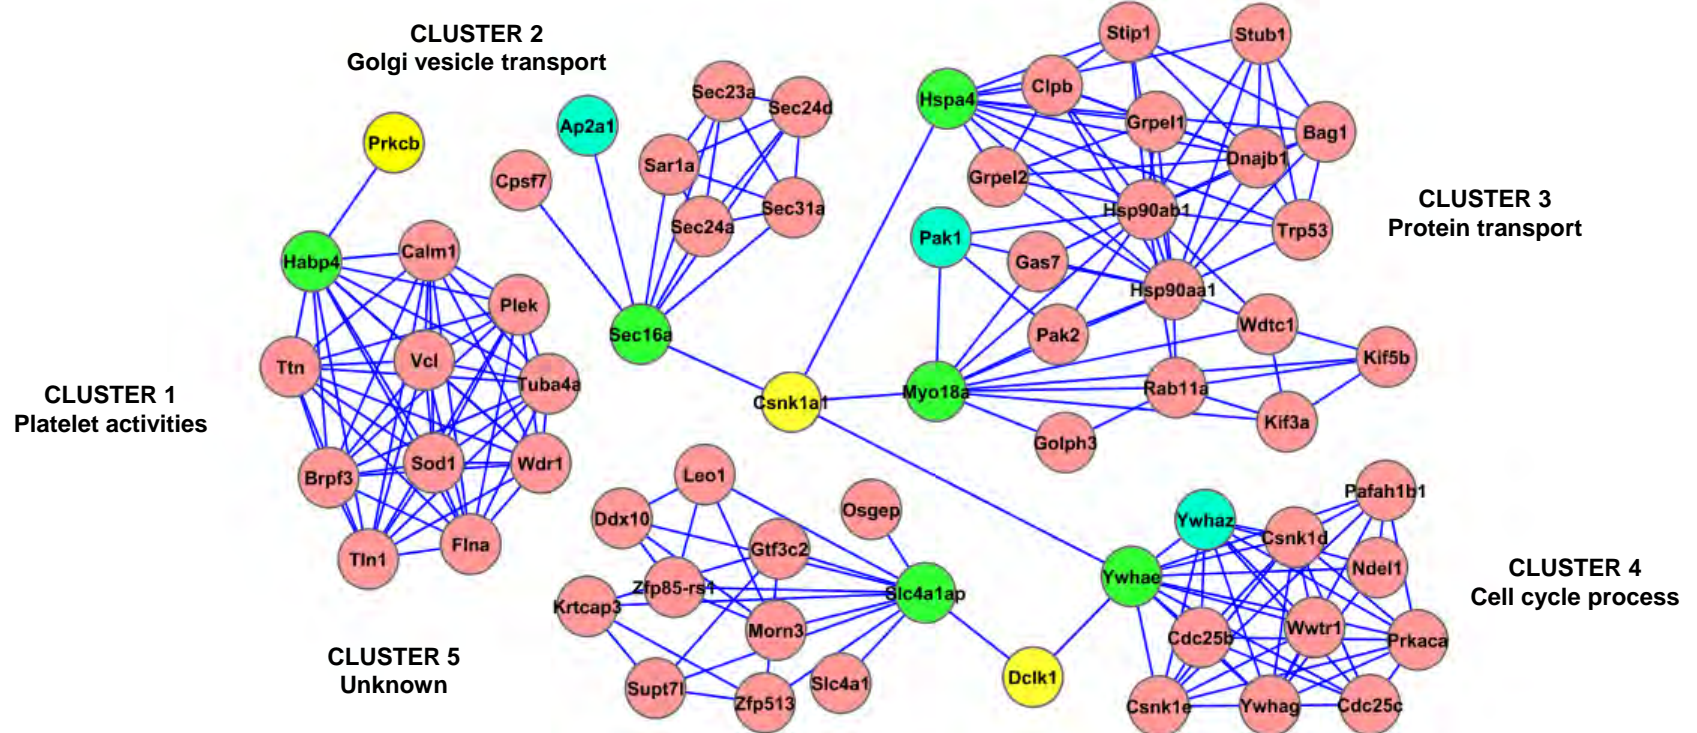

Suppl. Figure S4. Example of direct (A) and indirect (B) phosphorylation networks modulated in the transgenic line Tg(Dyrk1a) and sensitive to the L41 treatment.



## Map1a

Tg(*Dyrk1a*)

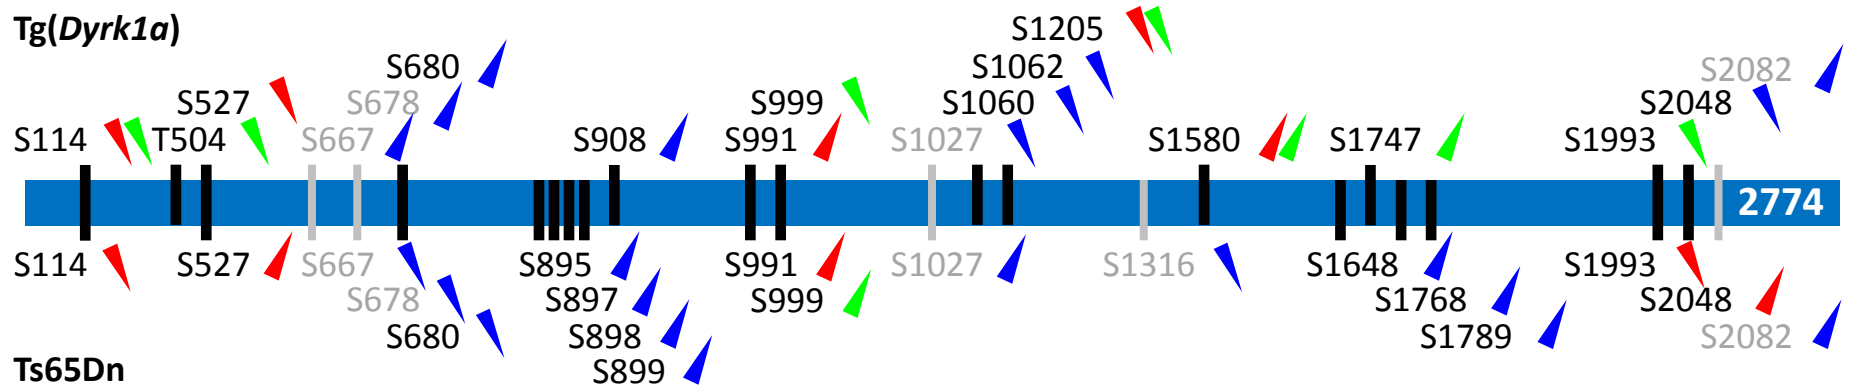

Ts65Dn

## Map1b

Tg(*Dyrk1a*)

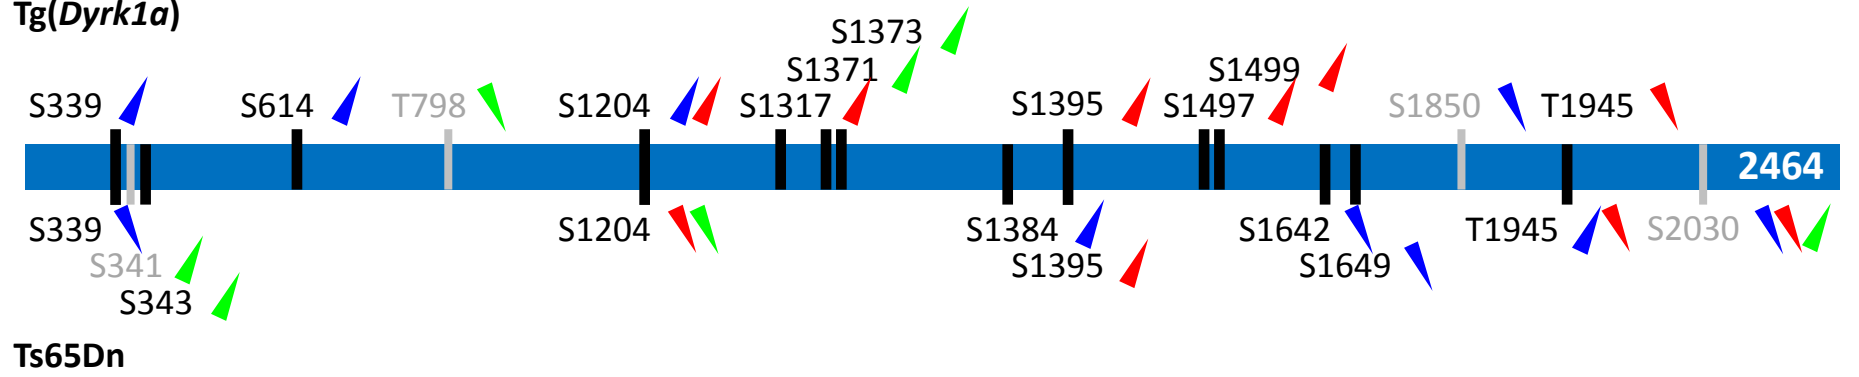

Ts65Dn

**Map2**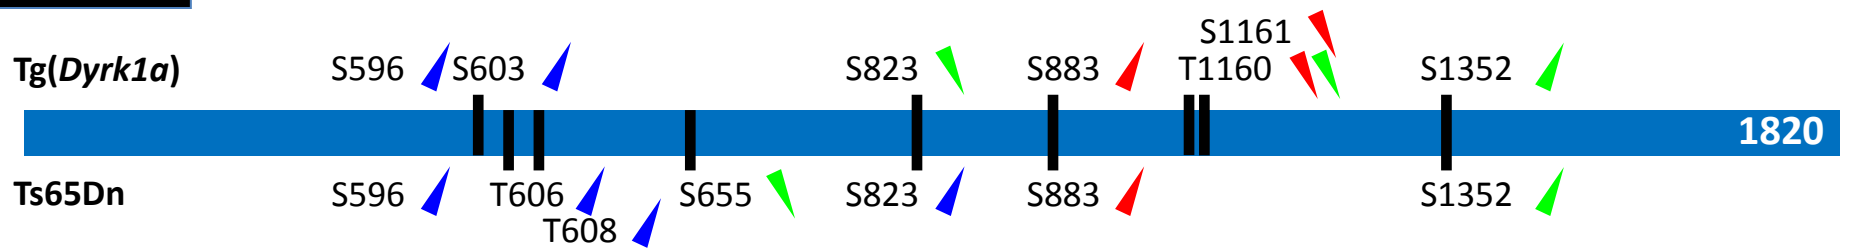**Piccolo**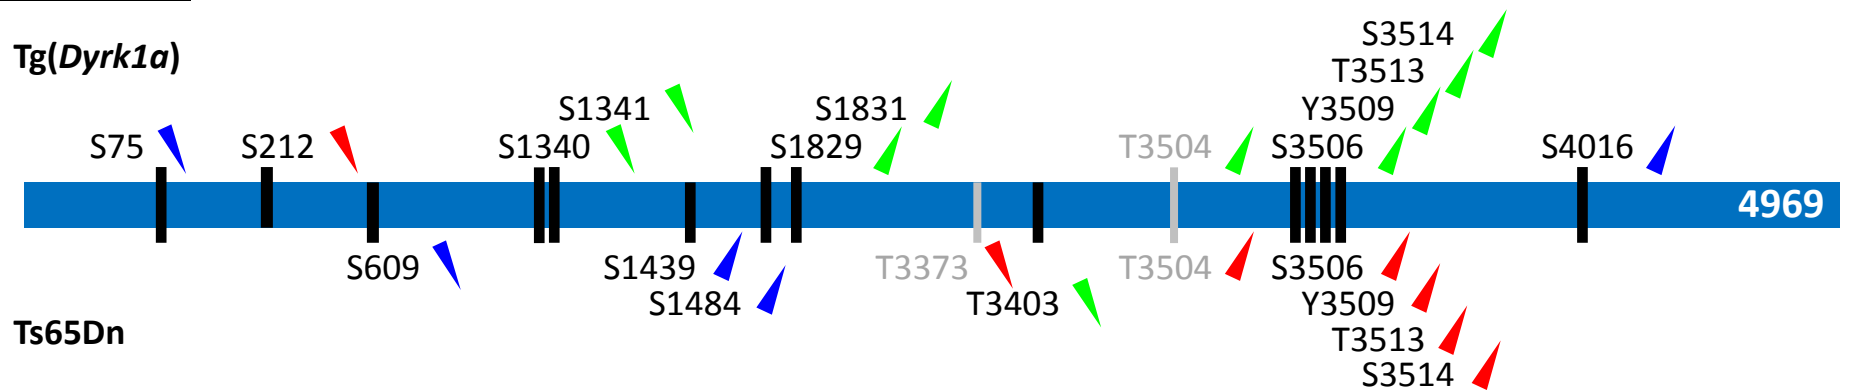**Synapsin-1**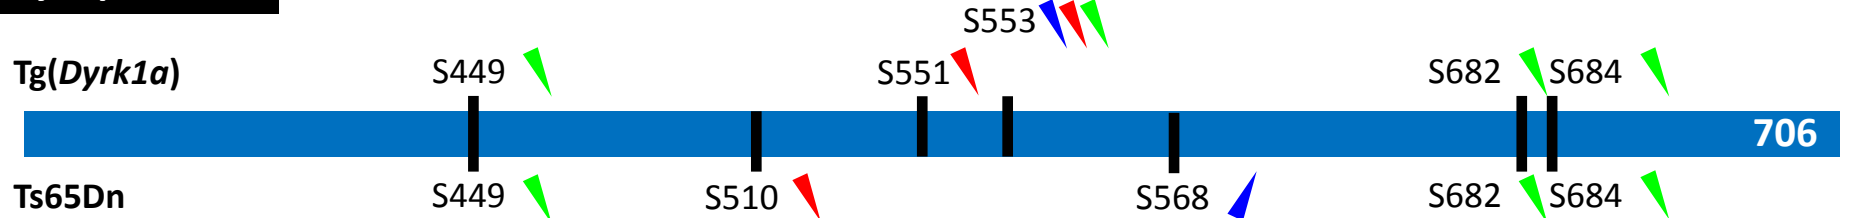

**Suppl. Figure S5. Five phosphoproteins shared between *Tg(Dyrk1a)* and *Ts65Dn* mice common to the hippocampus, cortex and cerebellum.** Schematic representation of each of the 5 common phosphoproteins displaying the identified phosphorylation sites in both *Tg(Dyrk1a)* (upper part) and *Ts65Dn* (lower part) models. Sites conserved in humans are indicated in black, while sites only seen in mice are in grey. Blue, red and green arrows show modulated phospho-sites in hippocampus, cortex and cerebellum, respectively. Downwards arrows indicate a site which is more phosphorylated in the transgenic vs. WT and less phosphorylated in L41 vs. vehicle treated mice. Upwards arrows indicate a site which is less phosphorylated in the transgenic vs. WT mice and more phosphorylated in L41 vs. vehicle treated mice.

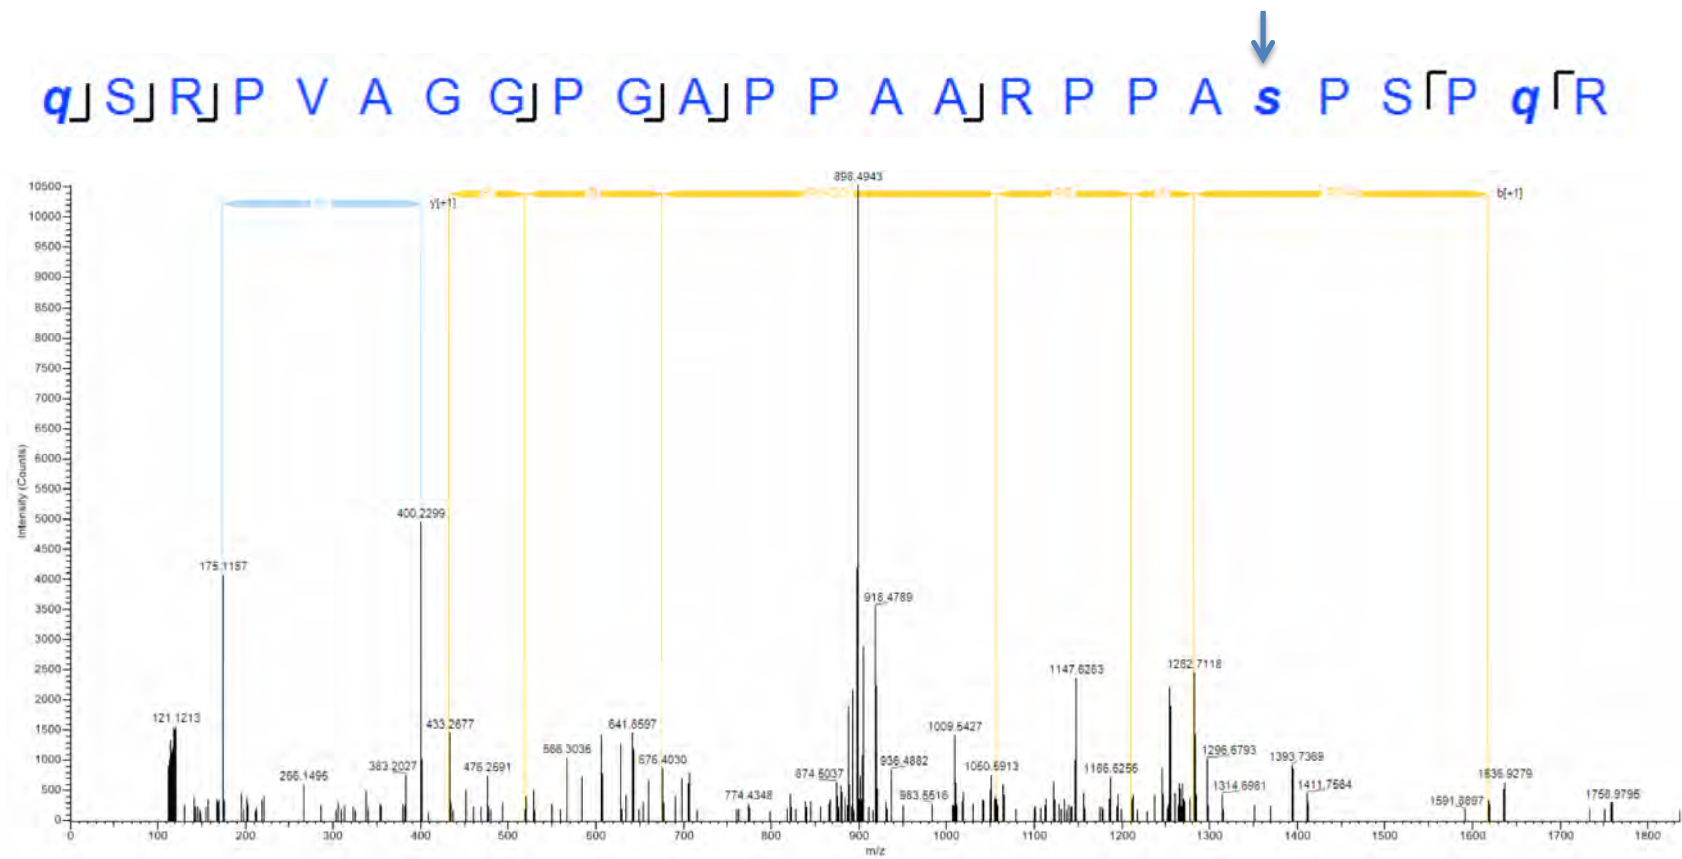

**Suppl. Figure S6.** Ultra-high resolution product ion spectrum of proteotypic peptide qSRPVAGGPGAPPAARPPAsPSPqR encoding for the phosphorylated residue Ser551 (denoted with lower case "s").

**Supplementary Table S1. Proteins up and down phosphorylated in the hippocampus of Tg(*Dyrk1a*) mice and reverted by L41 treatment.**

| Gene name     | Protein Group Accessions | Sequence                         | phosphoRS Site Probabilities                                                                                          | TgDyrk1a vs WT | TgDyrk1a +/-L41 |
|---------------|--------------------------|----------------------------------|-----------------------------------------------------------------------------------------------------------------------|----------------|-----------------|
| Map1b         | P14873                   | DLTSSVEK                         | T(3): 0.0; T(4): 5.6; S(5): 88.8; S(6): 5.6                                                                           | 3,35           | -2,96           |
| Kat7          | Q5SVQ0-4                 | SSGSETEQVDFSDR                   | S(1): 44.4; S(2): 5.6; S(4): 44.4; T(6): 5.6; S(13): 0.0                                                              | 2,53           | -0,64           |
| Sptbn1        | Q62261                   | ESSPVSPPTLDR                     | S(2): 93.7; S(3): 6.3; S(7): 0.0; T(9): 0.0                                                                           | 2,11           | -1,83           |
| Mast2         | B1AST8                   | NQSLGQSAPSLTAGLK                 | S(3): 0.0; S(7): 0.1; S(10): 0.1; T(12): 99.7                                                                         | 1,71           | -1,36           |
| Cep170b       | Q80U49                   | HEDGTQSDSEDLAK                   | T(5): 33.3; S(7): 33.3; S(9): 33.3                                                                                    | 1,63           | -0,59           |
| Pp2d1         | Q8BVT6                   | ECIISNLLR                        | S(5): 100.0                                                                                                           | 1,62           | -0,97           |
| 4921517D22Rik | Q8CET0                   | TLNVSPLDSSSETVSGNER              | T(1): 0.0; S(5): 96.6; S(9): 0.4; S(10): 2.4; T(12): 0.4; S(14): 0.0                                                  | 1,54           | -1,34           |
| Tsc22d2       | E9Q7M2                   | TEDVSSEIFDVSR                    | T(1): 0.0; S(5): 50.0; S(6): 50.0; S(12): 0.0                                                                         | 1,42           | 0,06            |
| Cttnbp2       | B9EJA2-5                 | FQGNANDPDQNGNNTQSPPSR            | T(15): 0.2; S(17): 88.2; S(20): 11.6                                                                                  | 1,41           | -0,20           |
| Cep170b       | Q80U49                   | HEDGTQSDSEDLAK                   | T(5): 0.8; S(7): 98.5; S(9): 0.8                                                                                      | 1,37           | -0,75           |
| Spink4        | O35679                   | ELMVSAGSLVFPR                    | S(5): 87.6; S(8): 12.4                                                                                                | 1,32           | -0,39           |
| H2-M10.4      | Q85ZW8                   | TLIYMTENNKK                      | T(1): 0.0; Y(4): 99.3; T(7): 0.7                                                                                      | 1,31           | 0,32            |
| Pak3          | Q61036-2                 | IGQGASGTVYALDIATGQVAIK           | S(6): 0.0; T(8): 0.0; Y(10): 0.0; T(11): 0.0; T(17): 100.0                                                            | 1,31           | -0,19           |
| Pcdh11x       | B1AZR7                   | GDSPPIIEHPL                      | S(3): 100.0                                                                                                           | 1,31           | -0,93           |
| Snap25        | P60879                   | RADQLADESLESTR                   | S(9): 100.0; S(12): 0.0; T(13): 0.0                                                                                   | 1,30           | -0,33           |
| Usp9x         | Q4FE56                   | AQENYEGGEEVSPQTK                 | Y(5): 0.0; S(12): 99.9; T(16): 0.1                                                                                    | 1,28           | -0,72           |
| Prkcb         | P68404-2                 | NIDQSEFEFGFSFNSEFLKPEVK          | S(5): 0.5; S(11): 49.8; S(15): 49.8                                                                                   | 1,24           | -1,29           |
| Mug2          | P28666                   | FDLAFSSEVSGTLQK                  | S(6): 49.8; S(7): 49.8; S(10): 0.3; T(12): 0.0                                                                        | 1,23           | -0,46           |
| Cyts          | P62897                   | TGQAAGFSYTDANK                   | T(1): 100.0; S(8): 0.0; Y(9): 0.0; T(10): 0.0                                                                         | 1,23           | -2,83           |
| Tln2          | E9PUM4                   | FGLEGDEESTMLEESVSPK              | S(9): 0.0; T(10): 0.0; S(15): 0.0; S(17): 100.0                                                                       | 1,22           | -0,19           |
| Gal           | P47212                   | EAGALDSLPGIPLATSSLEK             | S(7): 0.0; T(15): 7.5; S(16): 85.0; S(17): 7.5                                                                        | 1,12           | -0,88           |
| Scq2          | Q03517                   | VSPVSSSEDDLQEEELQQAIAK           | S(3): 0.0; S(6): 50.0; S(7): 50.0                                                                                     | 1,10           | -0,48           |
| Speg          | E9QQ25                   | MPSIPEEPEHGLER                   | S(3): 100.0                                                                                                           | 1,09           | -0,41           |
| Sept2         | P42128                   | EGSPIHPDPLGSK                    | S(3): 100.0; S(13): 0.0                                                                                               | 1,09           | -0,59           |
| Myo18a        | B2RRE2                   | EPADLDPEAASPAYSQAK               | S(11): 100.0; Y(14): 0.0; S(15): 0.0                                                                                  | 1,09           | -0,22           |
| Wfs1          | Q3UN10                   | LNATASLEQDK                      | T(4): 6.4; S(6): 93.6                                                                                                 | 1,08           | -0,38           |
| Gbf1          | Q6A099                   | ADAPDAGAQSSELPYHQNDVSLDR         | S(10): 49.7; S(12): 49.7; S(16): 0.3; Y(17): 0.3; S(23): 0.0                                                          | 1,08           | -0,40           |
| Slc1a3        | P56564                   | DVEMGNSVIEENEMK                  | S(7): 100.0                                                                                                           | 1,07           | -0,75           |
| Sgk071        | Q80YS9                   | SSSVALNMQRQK                     | S(1): 5.9; S(2): 47.0; S(3): 47.0                                                                                     | 1,03           | -0,53           |
| Hspa4         | Q3U2G2                   | MQVDQEEPHTEEQQQPQTPAENK          | T(10): 0.0; T(19): 100.0                                                                                              | 1,03           | -0,60           |
| Ppfia3        | B8QI35                   | QLSIALPQEFALTK                   | S(3): 100.0                                                                                                           | 1,01           | -0,22           |
| Ranbp2        | Q9ERU9                   | NRPGYVSEEEDEDEYEMAVK             | Y(5): 0.6; S(7): 99.4; Y(16): 0.0                                                                                     | 0,99           | 0,15            |
| Plcl1         | Q3USB7                   | KLPSEDLLEGEVTEDEEAEMSR           | S(4): 0.0; S(6): 0.0; T(14): 100.0; S(23): 0.0                                                                        | 0,99           | -0,31           |
| Slc4a1ap      | E9Q585                   | MLGEDSDEEEANTTEGK                | S(6): 100.0; T(14): 0.0; T(15): 0.0                                                                                   | 0,99           | -0,74           |
| Map2          | P20357                   | LASVSADAEVAR                     | S(3): 100.0; S(5): 0.0                                                                                                | 0,98           | -0,50           |
| Jup           | Q02257                   | NEGATYAAAVLFR                    | T(4): 0.1; T(6): 49.9; Y(7): 49.9                                                                                     | 0,97           | -0,67           |
| Wdr59         | Q8C0M0-2                 | ETEHISPPWGEESPEELR               | T(2): 0.0; S(6): 0.0; S(7): 0.0; S(12): 50.0; S(13): 50.0                                                             | 0,97           | 0,38            |
| Bcl2a1d       | O55179                   | LPQEIALDVGAYK                    | Y(13): 100.0                                                                                                          | 0,94           | -0,31           |
| Eif2ak4       | A2AUM0                   | EILDGLAYIHEK                     | Y(8): 100.0                                                                                                           | 0,93           | 0,13            |
| Map1a         | Q9QYR6                   | VPLSRSPQAQDTLGLAGGQTGCTIQLLPEQDK | S(4): 47.2; S(6): 47.2; T(12): 2.3; S(15): 0.6; T(21): 2.3; T(24): 0.6                                                | 0,91           | -0,56           |
| Cx3cl1        | O35188                   | SLGSEINPVHTDNFQER                | S(1): 0.0; S(4): 100.0; T(12): 0.0                                                                                    | 0,91           | -0,21           |
| Huwe1         | Q7TMY8                   | DLSMSEEDQMMR                     | S(3): 91.9; S(5): 8.1                                                                                                 | 0,89           | -0,71           |
| Duox2         | A2AQ99                   | SFIEISNNCLSK                     | S(1): 0.0; S(6): 0.6; S(11): 99.4                                                                                     | 0,86           | -0,59           |
| Dclk1         | Q9JLM8                   | AQPAPPELNSESEDYSPSSSETVR         | S(10): 0.0; S(12): 0.0; Y(15): 0.7; S(16): 98.6; S(18): 0.7; S(19): 0.0; S(20): 0.0; T(22): 0.0                       | 0,86           | -0,19           |
| Camkv         | Q3UHL1                   | SATPATDGRATPATEESTVPATQSSALPAAK  | S(1): 2.4; T(3): 2.4; T(6): 2.4; T(11): 44.8; T(14): 44.8; S(17): 2.4; T(18): 0.6; T(22): 0.0; S(24): 0.0; S(25): 0.0 | 0,85           | -0,26           |
| Uhrf1bp11     | A2RSJ4                   | SPTHASQHTQTEK                    | S(1): 0.0; T(3): 50.0; S(6): 50.0; T(10): 0.0; T(12): 0.0                                                             | 0,84           | 0,00            |



|               |          |                          |                                                                                    |      |       |
|---------------|----------|--------------------------|------------------------------------------------------------------------------------|------|-------|
| ltsn1         | E9Q0N0   | SAFTPATATGSSPSPVLGQGEK   | S(1): 0.0; T(4): 0.0; T(7): 0.0; T(9): 0.0; S(11): 0.0; S(12): 0.0; S(14): 100.0   | 0.83 | -0.43 |
| Pdap1         | Q3UHX2   | QYTSPEEIDAQLQAEK         | Y(2): 5.0; T(3): 94.8; S(4): 0.3                                                   | 0.83 | -0.85 |
| Map1b         | P14873   | ASLSPMDEPVPDSESPVEK      | S(2): 0.0; S(4): 0.0; S(13): 0.0; S(15): 100.0                                     | 0.82 | -0.09 |
| Pclo          | Q9QYX7   | GSVPAAAESPSMHR           | S(2): 0.0; S(10): 94.2; S(12): 5.8                                                 | 0.79 | -0.74 |
| Nrde2         | Q80XC6   | AYVQIQNK                 | Y(2): 100.0                                                                        | 0.78 | -0.65 |
| Txlna         | Q6PAM1   | EQGVESPGAQPASSPR         | S(6): 0.0; S(13): 9.0; S(14): 91.0                                                 | 0.78 | -0.37 |
| Ncl           | P09405   | NLSFNITEDELK             | S(3): 100.0; T(7): 0.0                                                             | 0.78 | -0.52 |
| Mttr7         | Q9Z2C9   | SPSQGDEDSALILTQDNLK      | S(1): 0.6; S(3): 92.2; S(9): 7.2; T(14): 0.0                                       | 0.77 | -0.47 |
| Marcks        | P26645   | KESGEGAEAEAGATAEGAK      | S(3): 100.0; T(13): 0.0                                                            | 0.76 | -0.53 |
| Stab1         | Q8R4Y4-2 | TVGQILASTEVEFTR          | T(1): 0.0; S(8): 50.0; T(9): 50.0; T(13): 0.0                                      | 0.76 | -0.48 |
| Me1           | P06801   | LFYSVLMSDVEK             | Y(3): 47.9; S(4): 47.9; S(8): 4.3                                                  | 0.76 | -0.07 |
| Epb4.111      | E9PV14   | MIASPEGSETMR             | S(4): 100.0; S(8): 0.0; T(10): 0.0                                                 | 0.75 | -0.35 |
| Git1          | Q68FF6   | HGSGADSDYENTQSGDLLGLEK   | S(3): 100.0; S(7): 0.0; Y(9): 0.0; T(12): 0.0; S(14): 0.0                          | 0.74 | -0.22 |
| Nsun2         | Q1HFZ0   | EGVILTNENAASPEQPGDEDAK   | T(6): 0.0; S(12): 100.0                                                            | 0.74 | -0.74 |
| Syt7          | E9PZA8   | QQSLQQPLSQNQGR           | S(3): 99.7; S(9): 0.3                                                              | 0.74 | -0.20 |
| Tom1l2        | Q5SRX1   | AAETVPDLPSPTEAPAPASNTSTR | T(4): 0.0; S(10): 99.8; T(13): 0.2; S(20): 0.0; T(22): 0.0; S(23): 0.0; T(24): 0.0 | 0.73 | 0.29  |
| Ssrp1         | A2AW05   | EGINPGYDDYADSDQHDAYLER   | Y(7): 5.5; Y(10): 47.3; S(13): 47.3; Y(21): 0.0                                    | 0.73 | -0.08 |
| Ppp6r3        | Q922D4-2 | IQQFDDGGSDDEIWEK         | S(9): 100.0                                                                        | 0.71 | -0.13 |
| Nefh          | P19246   | SPAEPKSPAEAK             | S(1): 0.0; S(7): 100.0                                                             | 0.71 | -0.03 |
| Map1a         | Q9QYR6   | SPPCEDFSVTGESEK          | S(1): 100.0; S(8): 0.0; T(10): 0.0; S(13): 0.0                                     | 0.71 | -0.21 |
| Arfgap1       | Q9EPJ9   | NSNSDGWESWEGASGEGR       | S(2): 50.0; S(4): 50.0; S(9): 0.0; S(14): 0.0                                      | 0.71 | -0.28 |
| Syn1          | O88935   | QSRPVAGGPGAPPAARPPASPQR  | S(2): 0.0; S(20): 0.3; S(22): 99.7                                                 | 0.70 | 0.30  |
| Bai1          | Q3UHD1   | NENVATLSVSSLER           | S(8): 0.0; S(10): 0.3; S(11): 99.7                                                 | 0.69 | -0.44 |
| Srgap2        | Q91Z67   | QTPRSPDSTANVR            | T(2): 0.0; S(5): 100.0; S(8): 0.0; T(9): 0.0                                       | 0.69 | -0.17 |
| Usp37         | Q8C0R0-2 | DYSSGVTNLDR              | Y(2): 0.0; S(3): 50.0; S(4): 50.0; T(7): 0.0                                       | 0.68 | -0.80 |
| Nufip2        | Q5F2E7   | GADNDGSGSESGYTPK         | S(7): 0.1; S(9): 8.3; S(11): 91.5; Y(13): 0.1; T(14): 0.0; T(15): 0.0              | 0.68 | -0.28 |
| Hspa4l        | P48722   | SFDDPIVQTER              | S(1): 100.0; T(9): 0.0                                                             | 0.68 | -0.24 |
| Dnm2          | Q3T9X3   | RIEGSGDQVDLLESGGAR       | S(5): 0.0; T(11): 100.0; S(15): 0.0                                                | 0.68 | -0.09 |
| Farp1         | F8VPU2   | LGAPENSGISTLER           | S(7): 0.7; S(10): 99.3                                                             | 0.67 | -0.35 |
| Scn1          | Q9CZC8   | AQSPCFGDDPAK             | S(3): 100.0                                                                        | 0.67 | -0.35 |
| Apba2         | E9Q505   | SASQDCIETPGAQEGK         | S(1): 50.0; S(3): 50.0; T(9): 0.0; T(10): 0.0                                      | 0.65 | -0.06 |
| Ranbp2        | Q9ERU9   | NRPQYVSEEEEDDEDYEMAVK    | Y(5): 10.1; S(7): 89.9; Y(16): 0.0                                                 | 0.65 | -0.16 |
| Hepacam       | Q640R3   | STTEPGPPGYSVPPVGRSPGLPIR | S(1): 0.0; S(11): 0.0; S(13): 0.0; S(20): 100.0                                    | 0.65 | -0.36 |
| Sdc4          | O35988   | VSMSTAQGSNIFER           | S(2): 0.7; S(4): 0.7; S(5): 5.4; T(6): 46.6; S(10): 46.6                           | 0.64 | -0.17 |
| Pcdhga9       | Q91XX9   | AGQIRYSVPEETEK           | Y(6): 0.0; S(7): 0.0; T(12): 100.0                                                 | 0.64 | -0.04 |
| Ywhae         | P62259   | LGLALNFSVFYIEILNSPDR     | S(8): 0.0; Y(11): 0.0; Y(12): 0.0; S(17): 100.0                                    | 0.64 | -0.20 |
| Sec16a        | A2AIX1   | APSLTSDSEGK              | S(3): 90.3; T(5): 8.7; S(6): 1.0; S(8): 0.0                                        | 0.63 | 0.02  |
| Csnk1a1       | E9Q4G7   | AAQQAASSGQQQAQPTGK       | S(7): 0.0; S(8): 0.0; S(9): 0.0; T(17): 99.6; T(19): 0.4                           | 0.62 | -1.05 |
| Sort1         | Q6PHU5   | SGYHDDSDDELLE            | S(1): 0.0; Y(3): 0.0; S(7): 100.0                                                  | 0.61 | -0.46 |
| D430041D05Rik | D3YZ21   | GHSETSTLSSQPSIDEVR       | S(3): 0.5; T(5): 97.7; S(6): 0.5; T(7): 0.5; S(9): 0.5; S(10): 0.5; S(13): 0.0     | 0.61 | -0.26 |
| Brap          | Q99MP8-2 | EQSESVNTAPESPSK          | S(3): 0.0; S(5): 0.0; T(8): 0.1; S(12): 7.1; S(14): 92.8                           | 0.60 | -0.53 |
| Slc6a11       | P31650   | AAEEARGSETLGGGGGAAAGTR   | S(8): 100.0                                                                        | 0.60 | -0.14 |
| Lmtk3         | Q5XJV6   | VAENGLESPEKEER           | S(8): 100.0                                                                        | 0.60 | -0.19 |
| Srrm2         | Q8BTI8-3 | ELSHSPPRENSFESSLEFK      | S(3): 12.7; S(5): 86.9; S(11): 0.1; S(14): 0.1; S(15): 0.3                         | 0.60 | -0.35 |
| Wdr20a        | Q3UWE6   | RNSTDSRPVSVTYR           | S(3): 99.6; T(4): 0.4; S(6): 0.0; S(10): 0.0; T(12): 0.0; Y(13): 0.0               | 0.60 | -0.51 |
| Tnr           | Q8BYI9   | ITFTPSSGISSEVTVPR        | S(6): 49.8; S(7): 49.8; S(10): 0.2; S(11): 0.2                                     | 0.59 | -0.91 |
| Aak1          | Q3UHJ0-2 | ILSDVTHSAVFGVPASK        | S(3): 0.4; T(6): 93.9; S(8): 5.7; S(16): 0.0                                       | 0.59 | -0.63 |
| Dnajc19       | D3Z5K6   | EAALILGVSPANK            |                                                                                    | 0.59 | -0.07 |

|               |          |                                   |                                                                                              |      |       |
|---------------|----------|-----------------------------------|----------------------------------------------------------------------------------------------|------|-------|
| Ndr3          | Q9QYF9   | SVTSNQSDGTQESCESPDVLR             | S(1): 0.0; T(3): 0.0; S(4): 0.0; S(7): 0.0; T(10): 0.0; S(13): 1.4; S(16): 98.6              | 0.59 | -0.57 |
| Unc13a        | Q4KUS2   | ESYSDSMHSYEEFSEPR                 | S(2): 0.0; Y(3): 0.0; S(4): 0.0; S(6): 0.0; S(9): 93.7; Y(10): 6.3; S(14): 0.0               | 0.59 | -0.33 |
| Eif4g1        | Q6NZJ6   | EATLPPVSPPK                       | T(3): 0.0; S(8): 100.0                                                                       | 0.58 | -0.16 |
| Zswim8        | Q3UHH1-5 | RTFANGSADEFQR                     | T(2): 91.1; S(7): 8.9                                                                        | 0.58 | -0.08 |
| Lmtk3         | Q5XJV6   | VAENGLESPEKEER                    | S(8): 100.0                                                                                  | 0.58 | -0.33 |
| Col4a1        | P02463   | GFPGGPDGLPGSMGPPGTPSVDHGFLVTR     | S(14): 98.9; T(20): 1.1; S(22): 0.0; T(30): 0.0                                              | 0.58 | -0.29 |
| 6430548M08Rik | Q3TA40   | RSSSNESFSSNQSADSAPDEETLALR        | S(2): 33.3; S(3): 33.3; S(4): 33.3; S(7): 0.1; S(9): 0.0; S(10): 0.0; S(13): 0.0; S(16): 0.0 | 0.58 | 0.19  |
| Fxyd7         | P59648   | SELPSSAPGGGGV                     | S(1): 0.8; S(5): 91.2; S(6): 8.0                                                             | 0.57 | 0.01  |
| Pacsin1       | Q61644   | GRLDSGQLGLYPANYVEAI               | S(5): 100.0; Y(11): 0.0; Y(15): 0.0                                                          | 0.57 | -0.05 |
| Tcp11l1       | Q8BTG3   | QEAENGALDISK                      | S(11): 100.0                                                                                 | 0.57 | -0.16 |
| Hspa4         | Q3U2G2   | STNEAMEWMNSK                      |                                                                                              | 0.57 | -0.21 |
| Plcl2         | Q8K394   | LSSNCSGVEGDVTDEDEGAEMSQR          | S(2): 0.0; S(3): 0.0; S(6): 0.0; T(13): 100.0; S(22): 0.0                                    | 0.56 | 0.03  |
| Clns1a        | Q923F1   | LGEESKEPLSDEEEDNDVEPISEFR         | S(5): 50.0; S(10): 50.0; S(24): 0.0                                                          | 0.56 | -0.28 |
| Rnf20         | Q5DTM8   | ALVVPEPEPDSDSNQER                 | S(11): 6.2; S(13): 93.8                                                                      | 0.56 | -0.52 |
| Amph          | Q7TQF7   | TPSPPEEPSPLPSPTASPNHTLAPASPAPVRPR | T(1): 4.5; S(3): 92.6; S(9): 0.3; S(13): 0.3; T(15): 1.1; S(17): 0.1; T(21): 1.1; S(26): 0.0 | 0.56 | -0.56 |
| Bcmo1         | E9Q321   | YLQSDTYIANIEANR                   | Y(1): 0.0; S(4): 0.1; T(6): 7.2; Y(7): 92.8                                                  | 0.56 | -0.28 |
| Gas2l1        | Q8JZP9   | RYSGDSDDSSASSAQSGPMGAR            | Y(2): 8.0; S(3): 8.0; S(6): 82.4; S(8): 0.8; S(9): 0.8; S(11): 0.0; S(12): 0.0; S(15): 0.0   | 0.55 | -0.73 |
| Gvin1         | L7N451   | NSQEILDNQK                        | S(2): 100.0                                                                                  | 0.55 | 0.04  |
| Ggt7          | Q99JP7   | LPSSSEMGSQDGSPLR                  | S(3): 0.0; S(4): 0.0; S(5): 0.0; S(6): 0.0; S(10): 0.0; S(14): 100.0                         | 0.55 | 0.18  |
| Pkd1l2        | E9Q4D4   | SFSQGFSPVLGFR                     | S(1): 50.0; S(3): 50.0; S(7): 0.0                                                            | 0.55 | -0.50 |
| Sparcl1       | P70663   | AEKPSALNSEETHEQSTEQDK             | S(5): 33.1; S(9): 33.1; T(13): 33.1; S(17): 0.3; T(18): 0.3                                  | 0.54 | 0.10  |
| Chd3          | F7C528   | ELQGDGPPSPPTNDPTVK                | S(9): 33.3; S(10): 33.3; T(12): 33.3; T(16): 0.0                                             | 0.54 | -0.60 |
| Tmem161a      | MOQWV0   | YIHPSEELR                         | Y(1): 50.0; S(5): 50.0                                                                       | 0.54 | -0.83 |
| Gfpt1         | P47856-2 | VDSTTCLFPVEEK                     | S(3): 3.7; T(4): 3.7; T(5): 92.7                                                             | 0.53 | -0.10 |
| Stk39         | Q9Z1W9   | TEDGDWEWSDEMDEK                   | T(1): 0.0; S(9): 100.0                                                                       | 0.53 | -0.65 |
| Jhdm1d        | Q3UWM4   | EDGFQPSYLVQGVK                    | S(8): 92.9; Y(9): 7.1                                                                        | 0.53 | -0.22 |
| Tom1          | O88746   | GLEFPMTDLMLSPIHTPQR               | T(7): 0.0; S(13): 100.0; T(17): 0.0                                                          | 0.53 | -1.27 |
| Ubap2         | A2AMY5   | IAYQSSAPPPDSAPGVSANGHGGR          | Y(3): 1.3; S(5): 9.9; S(6): 9.9; S(8): 78.9; S(12): 0.0; S(16): 0.0                          | 0.53 | -0.27 |
| Stim1         | P70302   | LIEGVHPGSLVEK                     |                                                                                              | 0.53 | -0.21 |
| Caskin1       | Q6P9K8-2 | AAASVVSPPASDCASPGDSAR             | S(4): 0.0; S(7): 0.0; S(13): 2.5; S(17): 97.0; S(21): 0.4                                    | 0.53 | -0.01 |
| Alad          | P10518   | DAAQSSPAFGDR                      | S(5): 50.0; S(6): 50.0                                                                       | 0.52 | -0.07 |
| Slc12a5       | Q91V14   | ETDPEVHLTWTK                      | T(2): 0.0; T(9): 99.6; T(11): 0.4                                                            | 0.52 | -0.59 |
| Nefm          | P08553   | QASHAQLGDAYDQEIR                  | S(3): 100.0; Y(11): 0.0                                                                      | 0.51 | 0.03  |
| Ube2w         | D6RCG4   | ELLALQNDPPPMTLNEK                 | T(14): 100.0                                                                                 | 0.51 | -0.60 |
| Mtdh          | Q80WJ7   | SETNWESPK                         | S(1): 0.0; S(7): 100.0                                                                       | 0.50 | -0.39 |
| Tbc1d5        | Q80XQ2   | EFTGSPPPSATK                      | T(3): 0.0; S(5): 100.0; S(9): 0.0; T(11): 0.0                                                | 0.50 | -0.59 |
| Habp4         | Q9JKS5   | SLAASGAQQPDSPPGPPGQK              | S(1): 0.0; S(5): 0.0; S(12): 100.0                                                           | 0.50 | -0.63 |
| Nvl           | Q9DBY8   | FEDVGGNDATLK                      | T(10): 100.0                                                                                 | 0.50 | 0.22  |
| Wwp1          | Q8BZZ3   | SSSPPIEQNGDALHENGDPATR            | S(1): 0.4; S(2): 49.8; S(3): 49.8; T(23): 0.0                                                | 0.49 | 0.17  |
| Ephb2         | A3KG01   | ELSEYNATAIK                       | S(3): 10.0; Y(5): 79.9; T(8): 10.0                                                           | 0.49 | -0.45 |
| Shank1        | D3YZU5   | EQDVVPFQESPK                      | S(10): 100.0                                                                                 | 0.49 | 0.01  |
| Slc7a14       | Q8BXR1   | ETCSPVSEGEFSSPATNTCGAK            | T(2): 33.3; S(4): 33.3; S(7): 33.3; S(13): 0.0; S(14): 0.0; T(17): 0.0; T(19): 0.0           | 0.48 | -0.88 |
| Map4k4        | F8VPL5   | RDSPLQGGGQQNSQAGQR                | S(3): 100.0; S(13): 0.0                                                                      | 0.48 | -0.20 |
| Csrp1         | P97315   | GFGFGGAGALVHSE                    | S(14): 100.0                                                                                 | 0.48 | -0.17 |
| Map1a         | Q9QYR6   | SHWDDGTNDSLEK                     | S(1): 0.0; T(7): 0.0; S(10): 100.0                                                           | 0.48 | -0.31 |

|                                          |          |                               |                                                                                               |       |       |
|------------------------------------------|----------|-------------------------------|-----------------------------------------------------------------------------------------------|-------|-------|
| Xirp2                                    | Q4U4S6-2 | VDASHQIEVEGVTR                |                                                                                               | 0,48  | -0,09 |
| Epb4.111                                 | A2AUK5   | SDSETEGLVFAR                  | S(1): 0.0; S(3): 100.0; T(5): 0.0                                                             | 0,48  | -0,29 |
| Slc1a4                                   | Q35874   | SEETSPLVTHQNPAGPVIAPELESK     | S(1): 0.0; T(5): 98.9; S(6): 1.1; T(10): 0.0; S(26): 0.0                                      | 0,47  | -0,81 |
| Misp                                     | Q9D279   | EMWYAGINPSDSVNSEVLGATRVK      | Y(4): 0.1; S(10): 0.7; S(12): 0.7; S(15): 2.0; T(21): 96.5                                    | 0,47  | -0,92 |
| Grin2b                                   | G3X9V4   | QHSYDTFVLDLQK                 | S(3): 2.9; Y(4): 97.1; T(6): 0.0                                                              | 0,47  | -0,09 |
| Fubp1                                    | Q3TUE1   | QQAAYYAQTSPQGMPPQHPAPQGQ      | Y(5): 0.0; Y(6): 0.0; T(9): 1.6; S(10): 98.3                                                  | 0,47  | -0,23 |
| Map1a                                    | Q9QYR6   | SEPQDFQEDSWGDTK               | S(1): 0.0; S(10): 5.4; T(14): 94.6                                                            | 0,47  | -0,05 |
| Rbbp8                                    | Q80YR6   | MDVTVIDTK                     | T(4): 100.0; T(8): 0.0                                                                        | 0,46  | -0,72 |
| Arhgef2                                  | H3BJU7   | LSPPHSPR                      | S(2): 100.0; S(6): 0.0                                                                        | 0,46  | -0,59 |
| Hn1                                      | P97825   | SNSSEASSGDFLDLK               | S(1): 0.0; S(3): 50.0; S(4): 50.0; S(7): 0.0; S(8): 0.0                                       | 0,46  | -0,03 |
| Uncharacterized protein C17orf59 homolog | Q9D6W8   | TLSGEEEAESVGVSSR              | T(1): 0.0; S(3): 100.0; S(10): 0.0; S(14): 0.0; S(15): 0.0                                    | 0,46  | -0,35 |
| Epb4.111                                 | A2AUK5   | DKSDETEGLVFAR                 | S(3): 100.0; S(5): 0.0; T(7): 0.0                                                             | 0,46  | -0,17 |
| Nefn                                     | P19246   | SPAAVKSPAFAK                  | S(1): 0.0; S(7): 100.0                                                                        | 0,46  | -0,04 |
| Gm4763                                   | Q8CFJ5   | SQTSIGIFSVVEVSNPSSSK          | S(1): 1.6; T(3): 48.3; S(4): 48.3; S(9): 1.6; S(14): 0.0; S(18): 0.0; S(19): 0.0              | 0,46  | -0,29 |
| Stmn1                                    | P54227   | SKESVPDFPLSPPK                | S(1): 0.0; S(4): 0.0; S(11): 100.0                                                            | -0,43 | 1,15  |
| Trp53i11                                 | A2AGS6   | KHSQTDLVSR                    | S(3): 100.0; T(5): 0.0; S(9): 0.0                                                             | -0,43 | 0,11  |
| Npnt                                     | D3YTX1   | VTGLHSGTLQVFRK                | T(2): 50.0; S(6): 50.0; T(8): 0.1                                                             | -0,43 | 0,41  |
| Uncharacterized protein C4orf21 homolog  | Q0VGT4   | SSSELSEVINMSLLK               | S(1): 0.5; S(2): 2.3; S(3): 12.9; S(6): 0.5; S(13): 83.9                                      | -0,43 | 0,53  |
| Fxr1                                     | Q61584-4 | VPGVTAIELDEDGTFR              | T(5): 0.0; T(13): 0.3; T(15): 99.7                                                            | -0,43 | 0,53  |
| Apc                                      | E9QLQ9   | SPSEPGGATTSPR                 | S(1): 0.0; S(3): 0.0; T(9): 1.2; T(10): 9.9; S(11): 88.9                                      | -0,43 | 0,47  |
| Nktr                                     | P30415   | SRASSSSSHSSK                  | S(1): 0.0; S(4): 0.0; S(5): 0.0; S(6): 0.0; S(7): 1.2; S(8): 1.2; S(11): 87.9; S(12): 9.7     | -0,43 | 1,35  |
| Camsap2                                  | Q8C1B1   | DYTVSLDSDMDDASK               | Y(2): 0.2; T(3): 4.5; S(5): 90.7; S(8): 4.5; S(14): 0.0                                       | -0,44 | -0,14 |
| Map2                                     | P20357   | VGSLDNAHHVPGGGNVK             | S(3): 100.0                                                                                   | -0,44 | 0,08  |
| Prrt2                                    | E9PUL5   | QENGAVVPLQAGDGEEGPAPQPHSPPSTK | S(24): 100.0; S(27): 0.0; T(28): 0.0                                                          | -0,44 | 0,20  |
| Fam169a                                  | Q5XG69   | SQSEEQSEASSEHLEQFTQSAEK       | S(1): 0.0; S(3): 0.0; S(7): 0.0; S(10): 33.2; S(11): 33.2; T(18): 33.2; S(20): 0.3            | -0,44 | 0,00  |
| Nyap2                                    | Q8BM65-2 | TPTSPLEELTSLFTSGR             | T(1): 0.4; T(3): 0.0; S(4): 99.6; T(10): 0.0; S(11): 0.0; T(14): 0.0; S(15): 0.0              | -0,45 | 0,35  |
| Map7d1                                   | A8Y5P4   | RSSQPSPTTVPASDPPAK            | S(2): 6.6; S(3): 93.4; S(6): 0.0; T(8): 0.0; T(9): 0.0; S(13): 0.0; S(15): 0.0                | -0,45 | -0,19 |
| Myo5a                                    | D3YZ62   | TSSIADEGTYTLDSILR             | T(1): 0.0; S(2): 0.5; S(3): 99.5; T(9): 0.0; Y(10): 0.0; T(11): 0.0; S(14): 0.0               | -0,45 | 0,07  |
| Trappc8                                  | E9PWG2   | EFHMQVSSSSK                   |                                                                                               | -0,45 | 0,31  |
| Specc1                                   | Q5SXY1   | GSPTGSSPNNASELSLALTEK         | S(2): 31.6; T(4): 31.6; S(6): 31.6; S(7): 5.0; S(12): 0.2; S(15): 0.0; S(18): 0.0; T(20): 0.0 | -0,46 | -0,05 |
| Kctd12                                   | Q6WVG3   | SPSGGAAGPLLTSPQSLDGSR         | S(1): 99.5; S(3): 0.5; T(12): 0.0; S(14): 0.0; S(16): 0.0; S(20): 0.0                         | -0,46 | 0,61  |
| Cep170b                                  | Q80U49   | ESPLSPPTVPDPGGATPGSAR         | S(2): 0.6; S(5): 99.4; T(8): 0.0; T(16): 0.0; S(19): 0.0                                      | -0,46 | 0,36  |
| Gas7                                     | B1ATI9   | STGDSQNLGSSSPGR               | S(1): 0.0; T(2): 0.0; S(5): 0.0; S(10): 5.4; S(11): 5.4; S(12): 89.2                          | -0,46 | 0,18  |
| C2cd2l                                   | Q80X80   | SLSPAATVTALHYEQGSPR           | S(1): 0.0; S(3): 0.0; T(7): 0.0; T(9): 0.0; Y(14): 0.0; S(18): 100.0                          | -0,46 | 0,59  |
| Prrc2b                                   | F8WHT3   | LKFSDEDEEDVVK                 | S(4): 100.0                                                                                   | -0,47 | 0,48  |
| Rgs14                                    | P97492   | SLGSGESESESRPGK               |                                                                                               | -0,47 | 0,33  |
| Map6                                     | Q7TSJ2   | GQSPTAPGPTK                   | S(3): 100.0; T(5): 0.0; T(10): 0.0                                                            | -0,47 | 0,34  |
| Sept_4                                   | P28661-2 | VARPQILEPRPQSPDLCCDDVEFR      | S(13): 100.0                                                                                  | -0,47 | 0,17  |
| Map2                                     | P20357   | STELGSDYYELSDSR               | S(1): 0.0; T(2): 0.0; S(6): 0.0; Y(8): 0.0; Y(9): 0.0; S(12): 0.0; S(14): 100.0               | -0,47 | 0,25  |
| Slc4a10                                  | Q5DTL9-2 | DSGLEDRGSESPFDTPSQR           | S(2): 0.0; S(10): 99.5; S(12): 0.5; T(15): 0.0; S(17): 0.0                                    | -0,47 | -0,39 |

|          |          |                                 |                                                                                                                       |       |       |
|----------|----------|---------------------------------|-----------------------------------------------------------------------------------------------------------------------|-------|-------|
| Utp20    | Q5XG71   | EVMEANLPSILLK                   | S(9): 100.0                                                                                                           | -0,47 | 0,09  |
| Basp1    | Q91XV3   | SDAAPAASDSKPSAEPAPSSK           | S(1): 0.0; S(8): 98.8; S(10): 0.6; S(13): 0.6; S(14): 0.0; S(20): 0.0; S(21): 0.0                                     | -0,48 | 0,54  |
| Srrm2    | Q8BTI8-3 | SLLPNSSQDELMEVEK                | S(1): 0.2; S(6): 49.9; S(7): 49.9                                                                                     | -0,48 | 0,30  |
| Stmn1    | P54227   | ESVPDFPLSPPKK                   | S(2): 0.0; S(9): 100.0                                                                                                | -0,48 | 0,42  |
| Zfp26    | P10076   | AFSTSSGLVEHIR                   |                                                                                                                       | -0,48 | -0,35 |
| Trhde    | Q8K093   | ILITQQHFYDIGAK                  | T(4): 50.0; Y(10): 50.0                                                                                               | -0,48 | 0,42  |
| Myh9     | Q8VDD5   | DLQGRDEQSEEK                    | S(9): 100.0                                                                                                           | -0,48 | 0,53  |
| Cacna1a  | P97445   | EMGTDGYSDEHYLPMEGQTR            | T(4): 0.0; Y(7): 49.9; S(8): 49.9; S(10): 0.3; Y(13): 0.0; T(20): 0.0                                                 | -0,49 | 0,21  |
| Rab3a    | P63011   | MSESLDTADPAVTGAK                | S(2): 100.0; S(4): 0.0; T(7): 0.0; T(13): 0.0                                                                         | -0,49 | -0,26 |
| Palm2    | Q8BR92   | AELVLIDEDEKSLR                  | S(13): 100.0                                                                                                          | -0,50 | 0,25  |
| Ctnnb1   | Q02248   | RTSMGGTQQQFVEGVR                | T(2): 50.0; S(3): 50.0; T(7): 0.0                                                                                     | -0,50 | -0,04 |
| Prrc2c   | Q3TLH4-5 | AFGSGIDIKPGTPPIGGR              |                                                                                                                       | -0,50 | 0,49  |
| Mtpap    | Q9D0D3   | EFFEYFGNFAFNK                   | Y(5): 100.0                                                                                                           | -0,51 | 0,20  |
| Rbm25    | B2RY56   | LGASNSPGQPNVSK                  | S(4): 0.0; S(6): 100.0; S(12): 0.0                                                                                    | -0,51 | -0,15 |
| Arhgef28 | G5E8P2   | LSLPMAAGHGDDAGDGAENILYL         | S(2): 96.9; Y(23): 3.1                                                                                                | -0,51 | 0,37  |
| Lrrc7    | Q80TE7   | LETTPTSPLPER                    | T(3): 2.1; T(4): 32.6; T(6): 32.6; T(7): 32.6; S(8): 0.0                                                              | -0,52 | 0,45  |
| Vps26b   | Q8C0E2   | SMSHQAAIASQR                    | S(1): 0.9; S(3): 99.1; S(10): 0.0                                                                                     | -0,52 | -0,19 |
| Nap1l4   | Q78ZA7   | EFITGDVEPTDAESAWHSENEEDK        | T(4): 0.0; T(10): 0.2; S(14): 1.3; S(18): 98.6                                                                        | -0,52 | 0,39  |
| C2cd2l   | Q80X80   | EAGLSQSHDDLSTATPSVR             |                                                                                                                       | -0,53 | 0,29  |
| Pacsin1  | Q61644   | KAEGATLSNATGAVESTSQAGDRGSVSSYDR | T(6): 0.0; S(8): 0.0; T(11): 0.0; S(16): 2.9; T(17): 2.9; S(18): 2.9; S(25): 87.7; S(27): 2.9; S(28): 0.6; Y(29): 0.1 | -0,53 | 0,28  |
| Basp1    | Q91XV3   | KAEGAGTEEEGTPK                  | T(7): 0.0; T(12): 100.0                                                                                               | -0,53 | 0,20  |
| Atp5j    | P97450   | QASGGPVDIGPEYQQDLDR             | S(3): 100.0; Y(13): 0.0                                                                                               | -0,54 | -0,41 |
| Specc1   | Q5SXY1   | ASSEDTLNKPSSASSGVAR             | S(2): 50.0; S(3): 50.0; T(6): 0.0; S(12): 0.0; S(14): 0.0; S(15): 0.0                                                 | -0,54 | 0,38  |
| Gm14597  | B1AXE0   | VLAFFEEDPLSHELK                 |                                                                                                                       | -0,54 | -0,19 |
| Palmd    | Q9JHU2   | RSNGPHTSPTRPQPQR                | S(2): 0.0; T(6): 0.0; T(8): 50.0; S(9): 50.0; T(11): 0.0; T(14): 0.0                                                  | -0,55 | 0,70  |
| Dhx9     | E9QNN1   | AEAENSGVSSGYSGPGPTWDR           | S(7): 0.0; S(11): 0.0; S(12): 0.0; Y(14): 0.0; S(16): 99.1; T(20): 0.8                                                | -0,55 | -0,10 |
| Ppp1r9a  | H3BL28   | DLTGGDLTSPDASASSCGR             | T(3): 0.0; T(8): 50.0; S(9): 50.0; S(13): 0.0; S(15): 0.0; S(16): 0.0                                                 | -0,55 | 0,45  |
| Slc9a6   | A1L3P4   | LVLPMDDSEPALNSLDDTRHSPA         | S(8): 0.0; S(14): 0.0; T(18): 6.0; S(21): 94.0                                                                        | -0,55 | -0,02 |
| Bsn      | Q88737   | TLPSPPEEAHLPLAGVPSQLYAASLLQR    | T(1): 0.0; S(4): 13.3; S(20): 86.4; Y(23): 0.4; S(26): 0.0                                                            | -0,55 | -0,27 |
| Col3a1   | P08121   | GPAGPPGPPGASGSPGLQGMPGER        | S(12): 50.0; S(14): 50.0                                                                                              | -0,55 | -0,15 |
| Rbm5     | Q91YE7-2 | GLVAAYSGSDNEEELVER              | Y(6): 0.0; S(7): 0.0; S(10): 100.0                                                                                    | -0,56 | 0,52  |
| Tstd1    | E9PY03   | GLQATQLAQGLGYTGAR               | T(5): 99.8; Y(13): 0.1; T(14): 0.1                                                                                    | -0,56 | 0,22  |
| Marcks1  | P28667   | AAATPESQEPQAK                   | T(4): 50.0; S(7): 50.0                                                                                                | -0,56 | 0,32  |
| Zranb2   | D3Z4U0   | YNLDASEEEDSNK                   | Y(1): 0.0; S(6): 100.0; S(11): 0.0                                                                                    | -0,56 | 0,50  |
| Atrx     | Q61687   | YVESDDEKPTDENVNEK               | Y(1): 11.2; S(4): 88.6; T(10): 0.2                                                                                    | -0,57 | -0,18 |
| Dmtn     | Q9WV69   | ESVGGSPQSK                      |                                                                                                                       | -0,58 | 0,41  |
| Tsg101   | Q61187   | QILNLYAEENAIETIFYLGEALR         | Y(6): 50.0; T(15): 50.0; Y(18): 0.0                                                                                   | -0,58 | 0,48  |
| Slc9a6   | A1L3P4   | LVLPMDDSEPALNSLDDTRHSPA         | S(8): 0.0; S(14): 0.0; T(18): 0.7; S(21): 99.3                                                                        | -0,59 | 0,25  |
| Dclk1    | Q9JLM8   | VCSSMDENDGPGEGDELGR             | S(3): 6.9; S(4): 93.1                                                                                                 | -0,59 | 0,16  |
| Rtn3     | Q9ES97-2 | ETTGAPTMSPDLEQEQLTIR            | T(2): 0.0; T(3): 0.0; T(8): 0.0; S(10): 100.0; T(19): 0.0                                                             | -0,59 | 0,32  |
| Dbn1     | Q9QXS6   | SPSDSSTASTPIAEQIER              | S(1): 0.0; S(3): 99.9; S(5): 0.1; S(6): 0.0; T(7): 0.0; S(9): 0.0; T(10): 0.0                                         | -0,59 | 0,46  |
| Map1a    | Q9QYR6   | GFKSPPCEDFSVTGESEK              | S(4): 100.0; S(11): 0.0; S(16): 0.0                                                                                   | -0,59 | 0,18  |
| Ctnna2   | Q61301-2 | QVQEAIAGISSAAQATSPTDEAK         | S(10): 0.0; S(11): 0.0; T(16): 0.4; S(17): 5.8; T(19): 93.9                                                           | -0,60 | 0,88  |
| Shisa7   | F6T9T6   | SSSLTPGLGGPDSMAPR               | S(1): 4.7; S(2): 47.6; S(3): 47.6; T(5): 0.1; S(13): 0.0                                                              | -0,60 | 0,16  |



|                                          |          |                                  |                                                                                                         |       |       |
|------------------------------------------|----------|----------------------------------|---------------------------------------------------------------------------------------------------------|-------|-------|
| Map1b                                    | P14873   | DYNASASTISPPSSMEEDK              | Y(2): 0.0; S(5): 0.0; S(7): 0.0; T(8): 0.0; S(10): 99.6; S(13): 0.2; S(14): 0.2                         | -0.61 | -0.25 |
| Pacsin1                                  | Q61644   | STSGPGMMPNWPQFEENPDLPHHTAK       | S(1): 0.0; T(2): 0.0; S(3): 1.1; T(24): 97.9; T(25): 1.1                                                | -0.61 | 0.41  |
| 8030462N17Rik                            | Q0VAW6   | SRSESETSTMAAK                    | S(1): 0.2; S(3): 99.7; S(5): 0.0; T(7): 0.0; S(8): 0.0; T(9): 0.0                                       | -0.61 | 0.22  |
| Tmem163                                  | Q8C996   | ISESGQFSDGLEDR                   | S(2): 0.0; S(4): 100.0; S(8): 0.0                                                                       | -0.61 | 0.55  |
| Slc7a8                                   | Q9QXW9   | NHPGSDTSPEAEASSGGGGVALK          | S(5): 0.2; T(7): 49.9; S(8): 49.9; S(14): 0.0; S(15): 0.0                                               | -0.62 | 0.07  |
| Sirt2                                    | Q8VDQ8   | REHANIDAQSGSQANPNSTTISP GKSPPPAK | S(10): 0.0; S(12): 0.0; S(18): 0.7; T(19): 0.7; T(20): 32.9; S(22): 32.9; S(26): 32.9                   | -0.62 | 0.21  |
| Lman1l                                   | Q8VCD3-2 | QSQILQALQALSR                    | S(2): 100.0; S(12): 0.0                                                                                 | -0.62 | 0.53  |
| Cep170b                                  | Q80U49   | GSLDWPEEER                       | S(2): 100.0                                                                                             | -0.63 | 0.29  |
| Add1                                     | Q9QYC0   | SPPDQSAVNPSTPPSTPVKLEEDLPQEPTSR  | S(1): 0.0; S(6): 0.3; T(11): 77.5; S(14): 11.1; T(15): 11.1; T(28): 0.0; S(29): 0.0                     | -0.63 | 0.34  |
| Gap43                                    | P06837   | ATTDNSPSSK                       | S(6): 94.8; S(8): 5.2; S(9): 0.0                                                                        | -0.63 | 0.70  |
| ptplad1                                  | Q8K2C9   | WLDESDAEMELR                     | S(5): 100.0                                                                                             | -0.63 | 0.21  |
| Add2                                     | Q9QYB8   | TESVTSGLSPEGSPSKSPSK             | T(1): 0.0; S(3): 0.0; T(5): 0.0; S(6): 0.0; S(10): 0.0; S(14): 0.0; S(16): 0.0; S(18): 93.7; S(20): 6.3 | -0.63 | 0.50  |
| Basp1                                    | Q91XV3   | AEGAGTEEEETPKSEPPQAADATEVK       | T(6): 1.4; T(11): 97.2; S(15): 1.4; T(24): 0.0                                                          | -0.63 | 0.57  |
| Prkar1a                                  | Q9DBC7   | TDSREDEISPPPNPVVK                | T(1): 0.0; S(3): 0.0; S(9): 100.0                                                                       | -0.63 | 0.67  |
| Tppp                                     | Q7TQD2   | AANKTPPKSPGDPAR                  | T(5): 100.0; S(9): 0.0                                                                                  | -0.63 | 0.67  |
| Dmtn                                     | Q9WV69   | KGAEDEEEEDDDSEEEIK               | S(14): 100.0                                                                                            | -0.64 | 0.90  |
| Palmd                                    | Q9JHU2   | SGPQCSSPTCQEETEDVR               | S(1): 0.0; S(6): 50.0; S(7): 50.0; T(9): 0.0; T(14): 0.0                                                | -0.64 | 0.37  |
| Rem2                                     | E9Q4D5   | QASPLGTPTPEADTLLK                | S(3): 100.0; T(7): 0.0; T(9): 0.0; T(14): 0.0; T(15): 0.0                                               | -0.64 | 0.29  |
| Syk                                      | E9PWE9   | ELNGTYAISGGR                     | T(5): 50.0; Y(6): 50.0; S(9): 0.0                                                                       | -0.64 | 0.17  |
| Hnmp1l                                   | Q921F4   | LKTEEGEIVYSAESENK                | T(3): 0.0; Y(10): 0.0; S(11): 100.0; S(15): 0.0                                                         | -0.64 | 0.56  |
| Akap5                                    | D3YVF0   | GPVAASPQK                        | S(6): 100.0                                                                                             | -0.65 | 0.18  |
| Map1b                                    | P14873   | EEQSPVKAIEVAEK                   | S(4): 100.0                                                                                             | -0.65 | -0.10 |
| Gap43                                    | P06837   | KEGDSATTDAAATSPKAEPSK            | S(6): 0.0; T(8): 0.0; T(9): 0.0; T(15): 7.2; S(16): 92.8; S(23): 0.0                                    | -0.65 | 0.72  |
| Caskin1                                  | Q6P9K8-2 | AQPQSPQALGGPHGPATAK              | S(5): 100.0; T(17): 0.0                                                                                 | -0.65 | 0.00  |
| Ace                                      | P09470   | GPQFGSEVELR                      | S(6): 100.0                                                                                             | -0.67 | 0.17  |
| Strip2                                   | E9QN41   | QDSLDIYNER                       | S(3): 100.0; Y(7): 0.0                                                                                  | -0.67 | 0.98  |
| Marcks1                                  | P28667   | AAATPESQEPQAK                    | T(4): 99.5; S(7): 0.5                                                                                   | -0.67 | 0.41  |
| Dnah7b                                   | L7N1Y0   | SSDEVVNEVAGDILSK                 | S(1): 7.5; S(2): 92.5; S(15): 0.0                                                                       | -0.67 | -0.02 |
| Thrap3                                   | Q569Z6   | ASVSDLSPR                        | S(2): 0.0; S(4): 0.0; S(7): 100.0                                                                       | -0.68 | 0.25  |
| Agap2                                    | Q3UHD9   | TDSQSEAVAIAIR                    | T(1): 0.0; S(3): 99.8; S(5): 0.2                                                                        | -0.68 | 0.34  |
| Clip2                                    | Q9Z0H8   | TGNESGSLSDSGSVK                  | S(5): 0.0; S(7): 91.1; S(10): 8.9; S(12): 0.0; S(14): 0.0                                               | -0.69 | -0.06 |
| Hnmpa0                                   | Q9CX86   | LFIGLNVQTSSEGLR                  |                                                                                                         | -0.69 | 0.20  |
| Kif2a                                    | P28740-1 | ARPSQLPEQSSSAQQNGSVSDISPVQAAK    | S(4): 0.0; S(10): 0.0; S(11): 0.0; S(12): 0.0; S(18): 0.0; S(20): 0.0; S(23): 100.0                     | -0.70 | 0.50  |
| Krt26                                    | Q3TRJ4   | EALSEELTYLQK                     | S(4): 0.0; T(8): 50.0; Y(9): 50.0                                                                       | -0.70 | 0.72  |
| Nudt3                                    | Q9JI46   | SESEEEVLLVSSSR                   | S(1): 0.0; S(3): 100.0; S(11): 0.0; S(12): 0.0; S(13): 0.0                                              | -0.70 | 0.61  |
| Cend1                                    | Q9JKC6   | SASSPKPDTK                       | S(1): 0.0; S(3): 4.9; S(4): 95.1; T(9): 0.0                                                             | -0.71 | 0.51  |
| Prrt2                                    | E9PUL5   | ASPSPPSEAR                       | S(2): 99.3; S(4): 0.1; S(6): 0.7; S(8): 0.0                                                             | -0.71 | 0.37  |
| Uncharacterized protein C17orf59 homolog | Q9D6W8   | RGSPGGVEMNVELPQQEGDDDDDEEEAAAGR  | S(3): 100.0                                                                                             | -0.72 | 0.74  |
| Map1a                                    | Q9QYR6   | AEEEMEEVHPSDEEEETKAESFYQK        | S(12): 33.3; T(19): 33.3; S(23): 33.3; Y(25): 0.2                                                       | -0.72 | 0.55  |
| Nsmf                                     | A2AJ96   | MYSVDGVSDDVPIR                   | Y(2): 0.0; S(3): 100.0; S(8): 0.0                                                                       | -0.72 | 0.29  |
| Nucks1                                   | Q80XU3   | ATVTPSPVK                        | T(2): 0.0; T(4): 0.0; S(6): 100.0                                                                       | -0.73 | 0.30  |
| Aldoa                                    | P05064   | GILAADESTGSIK                    | S(8): 0.3; T(9): 5.5; S(11): 94.2                                                                       | -0.73 | 0.34  |
| Pde4d                                    | B1PSD9   | EWYQSTIPQSPAPDDQEEGR             | S(5): 0.0; S(10): 99.8; S(12): 0.2                                                                      | -0.73 | 0.51  |
| Cep170b                                  | Q80U49   | QESFTKEPTSGPPAPGK                | S(3): 93.6; T(5): 6.4; T(9): 0.0; S(10): 0.0                                                            | -0.75 | 0.63  |
| Fam171a2                                 | A2A699   | SVEGPGGLEPSLDEYR                 | S(1): 100.0; S(11): 0.0; Y(15): 0.0                                                                     | -0.75 | 0.71  |
| Shank1                                   | D3YZU5   | GSSTEDGPGVPPPSPR                 | S(2): 13.5; S(3): 86.5; S(14): 0.0                                                                      | -0.76 | 0.42  |

|                                          |          |                                 |                                                                                                         |       |       |
|------------------------------------------|----------|---------------------------------|---------------------------------------------------------------------------------------------------------|-------|-------|
| Zc2hc1a                                  | Q8BJH1   | ASSVNSPLGNKQTLSPSHR             | S(2): 0.0; S(3): 0.0; S(6): 0.0; T(14): 0.0; S(16): 99.5; S(18): 0.5                                    | -0.76 | 0.63  |
| Hcn2                                     | O88703   | RAPPGLPPAASPGPPAASPPAASSPR      | S(12): 0.0; S(19): 100.0; S(25): 0.0; S(26): 0.0                                                        | -0.77 | 0.46  |
| Marcks1                                  | P28667   | GDVTAEEAAGASPAK                 | T(4): 0.0; S(12): 100.0                                                                                 | -0.77 | 0.41  |
| Pcm1                                     | Q9R0L6   | VTNAISPESPGVGR                  | T(2): 0.0; S(6): 100.0; S(9): 0.0; S(10): 0.0                                                           | -0.78 | 0.15  |
| Dzip1l                                   | Q499E4-2 | GSGGLASSGTLVQSIVK               | S(2): 0.0; S(7): 91.1; S(8): 8.1; T(10): 0.8; S(14): 0.0                                                | -0.79 | 1.35  |
| Sirt2                                    | Q8VDQ8   | EHANIDAQSGSQAPNPSTTISPGKSPPAK   | S(9): 0.0; S(11): 0.0; S(17): 42.8; T(18): 42.8; T(19): 6.6; S(21): 1.1; S(25): 6.6                     | -0.81 | 0.24  |
| Nap1l4                                   | Q78ZA7   | ASGDGELDEDESEFTLASDFEIGHFFR     | S(2): 0.0; S(7): 100.0; S(12): 0.0; T(15): 0.0; S(18): 0.0                                              | -0.81 | 0.49  |
| Chgb                                     | P16014   | EGVDDQESLRPSNQASK               |                                                                                                         | -0.82 | -0.01 |
| Slc7a14                                  | Q8BXR1   | HKQNSEALIANDELDCSPE             | S(5): 0.0; S(17): 100.0                                                                                 | -0.83 | 0.24  |
| Rimbp2                                   | Q80U40-2 | DHLSPDFYDESETDPGAELPAR          | S(4): 100.0; Y(8): 0.0; S(11): 0.0; T(13): 0.0                                                          | -0.84 | 0.16  |
| Mtfr1l                                   | Q9CWE0   | ASSFADMMGILK                    | S(2): 50.0; S(3): 50.0                                                                                  | -0.84 | 1.02  |
| Mccc2                                    | Q3ULD5   | AYHGDSVARLGTQPDASSTYQENYEQMK    | S(6): 0.0; S(16): 9.7; S(18): 45.1; S(19): 45.1                                                         | -0.85 | 0.47  |
| Ankrd34a                                 | B2RW11   | APSLPAPPPSGAGSPR                | S(3): 0.0; S(10): 0.0; S(15): 100.0                                                                     | -0.85 | 0.39  |
| Basp1                                    | Q91XV3   | ETPAASEAPSSAAK                  | T(2): 0.0; S(6): 0.0; S(10): 5.8; S(11): 94.2                                                           | -0.86 | 0.60  |
| Luzp1                                    | Q8R4U7   | EKPDSDDDLIESFVTAK               | S(5): 100.0; S(13): 0.0; T(16): 0.0                                                                     | -0.88 | 0.85  |
| Ogfr                                     | Q99PG2   | IALNLEGCALSPTSQEP               | S(11): 90.4; T(13): 8.7; S(14): 0.9                                                                     | -0.89 | -0.38 |
| Ppp1r18                                  | Q8BQ30   | EEAEAQSRPLR                     |                                                                                                         | -0.90 | 0.41  |
| Akap5                                    | D3YVF0   | GPVAASPQKER                     | S(6): 100.0                                                                                             | -0.90 | 0.56  |
| Marcks                                   | P26645   | GEATAERPGEAAVASSPSK             | T(4): 0.0; S(15): 0.8; S(16): 98.3; S(18): 0.8                                                          | -0.92 | 0.04  |
| Lmna                                     | P48678   | ASSHSSQSQGGGSVTK                | S(2): 6.8; S(3): 6.8; S(5): 0.6; S(6): 85.1; S(8): 0.6; S(13): 0.0                                      | -0.94 | 0.00  |
| Cacna1b                                  | A2AIS0   | ASCEALYSEMDPEER                 | S(2): 100.0; Y(7): 0.0; S(8): 0.0                                                                       | -0.94 | 0.02  |
| Gpr123                                   | Q8C4G9   | ALPCPGADQPPYPK                  | Y(12): 100.0                                                                                            | -0.96 | -0.34 |
| Arhgap5                                  | P97393   | GSEEDPLLSPVETWK                 | S(2): 0.0; S(9): 100.0; T(13): 0.0                                                                      | -0.97 | 0.68  |
| Synpr                                    | D3Z5Q8   | QASDWHSLSTLQLSLGLYK             | S(3): 10.1; S(7): 89.9; S(9): 0.0; S(14): 0.0                                                           | -0.98 | 0.05  |
| Nucks1                                   | Q80XU3   | VVDYSQFQESDDADEYGR              | Y(4): 0.0; S(5): 0.0; S(10): 100.0; Y(17): 0.0                                                          | -1.02 | 0.13  |
| Pclo                                     | Q9QYX7   | RSQEVTDFLAPLQSSR                | S(2): 100.0; S(15): 0.0; S(16): 0.0                                                                     | -1.02 | 0.58  |
| Vps26b                                   | Q8C0E2   | SMSHQAAIASQR                    | S(1): 0.2; S(3): 99.8; S(10): 0.0                                                                       | -1.03 | -0.25 |
| Psd3                                     | E9PUC5   | ISNSSEFSK                       | S(2): 0.0; S(4): 100.0; S(5): 0.0; S(8): 0.0                                                            | -1.04 | 0.81  |
| Plau                                     | P06869   | EDSLAYHNDIALLK                  | S(3): 1.8; Y(6): 98.2                                                                                   | -1.06 | 1.52  |
| Marcks                                   | P26645   | VNGDASPAAAEPGAK                 | S(6): 100.0                                                                                             | -1.08 | -0.06 |
| Pgm1                                     | Q9D0F9   | AIGGIILTASHNPGGPNDFGIK          | T(8): 9.7; S(10): 90.3                                                                                  | -1.09 | 0.55  |
| Ppp1r12a                                 | Q9DBR7   | STGVSFWTQSDENEQERQSDTEDGSSK     | S(1): 0.0; T(2): 0.0; S(5): 0.0; T(8): 0.0; S(11): 0.0; S(20): 97.9; T(22): 2.1; S(26): 0.0; S(27): 0.0 | -1.11 | 0.67  |
| Reps2                                    | A2AFI8   | APSQAAESSPTK                    | S(3): 0.0; S(8): 0.3; S(9): 99.7                                                                        | -1.14 | 0.51  |
| Amigo1                                   | Q80ZD8   | RMSDPESVSSVFSDTPIVV             | S(3): 88.2; S(7): 11.5; S(9): 0.0; S(10): 0.0; S(13): 0.2; T(15): 0.0                                   | -1.15 | 1.36  |
| Slc7a8                                   | Q9QXW9   | NHPGSDTSPEAEASSGGGGVALK         | S(5): 5.2; T(7): 47.4; S(8): 47.4; S(14): 0.0; S(15): 0.0                                               | -1.21 | -0.20 |
| Rltpr                                    | Q3V3V9-2 | LEAPPSPSLGSLGSKPLPPYPTEPSSPER   | S(6): 0.0; S(8): 0.0; S(11): 0.0; S(15): 0.0; S(26): 50.0; S(27): 50.0                                  | -1.26 | 0.34  |
| Slc23a2                                  | Q9EPR4   | SSLAETLDSTGSLDPQR               | S(1): 0.0; S(2): 0.0; T(6): 0.0; S(9): 0.0; T(10): 0.0; S(12): 100.0                                    | -1.30 | -0.10 |
| Basp1                                    | Q91XV3   | KAEGAGTEEEGTPKESEPQAAADATEVK    | T(7): 0.1; T(12): 49.9; S(16): 49.9; T(25): 0.0                                                         | -1.30 | 1.22  |
| 2010300C02Rik                            | E9Q3M9   | VFSQENVCDR                      | S(3): 100.0                                                                                             | -1.44 | 0.75  |
| Marcks                                   | P26645   | AEDGAAPSPSSETPKK                |                                                                                                         | -1.52 | 1.15  |
| Cend1                                    | Q9JKC6   | ADPVLLNHSNLKPAPTVPAAPSSPDATSEPK | S(10): 0.0; T(17): 0.0; S(23): 88.6; S(24): 11.4; T(28): 0.0; S(29): 0.0                                | -1.54 | 1.50  |
| Sipa1l3                                  | G3X9J0   | SSSEITLSECDVEEPGDPR             | S(1): 8.5; S(2): 8.5; S(3): 83.1; T(6): 0.0; S(8): 0.0                                                  | -1.57 | 0.30  |
| Uncharacterized protein C15orf39 homolog | Q3TEI4   | GAAYQAGGLGSPYLR                 | Y(4): 100.0; S(11): 0.0; Y(13): 0.0                                                                     | -2.00 | 0.95  |
| Ubp2l                                    | Q80X50   | STSAPQMSPGSSDNQSSSPQAQQK        | S(1): 0.0; S(3): 0.0; S(8): 4.2; S(11): 47.9; S(12): 47.9; S(16): 0.0; S(17): 0.0; S(18): 0.0           | -2.04 | 1.03  |

**Supplementary Table S2. Proteins up and down phosphorylated in the Cortex of Tg(*Dyrk1a*) mice and reverted by L41 treatment.**

| Gene name     | Protein Group Accessions | Sequence                       | phosphoRS Site Probabilities                                                                                         | TgDyrk1a vs WT | TgDyrk1a +/-L41 |
|---------------|--------------------------|--------------------------------|----------------------------------------------------------------------------------------------------------------------|----------------|-----------------|
| Asap1         | H3BL41                   | QASEDSNDLTPTLPETPVPLPR         | S(3): 87.1; S(6): 12.9; T(10): 0.0; T(12): 0.0; T(16): 0.0                                                           | 3,10           | -1,42           |
| Atp1a1        | Q8VDN2                   | AVAGDASESALLK                  | S(7): 0.1; S(9): 99.9                                                                                                | 2,52           | -2,15           |
| Avl9          | Q80U56                   | DSLPSDSPPIITVQPQANNR           | S(2): 0.0; S(5): 0.7; S(7): 99.3; T(11): 0.0                                                                         | 2,25           | -1,20           |
| Ralgapb       | E9Q0J2                   | TNSGISSASGGSTEPTTPDSEPAQALLR   | T(1): 0.0; S(3): 0.0; S(6): 0.5; S(7): 0.5; S(9): 0.5; S(12): 0.5; T(13): 0.5; T(16): 48.7; T(17): 48.7; S(20): 0.0  | 1,96           | -1,12           |
| Ctnnb1        | Q02248                   | TSMGGTQQQFVEGVR                | T(1): 50.0; S(2): 50.0; T(6): 0.0                                                                                    | 1,95           | -1,76           |
| Szrd1         | A2AA86                   | ILGSASPEEEQEKPIIDRPRTR         | S(4): 0.0; S(6): 100.0; T(20): 0.0                                                                                   | 1,94           | -1,43           |
| Strip1        | Q8C079                   | AASPPASASDLIEQQQK              | S(3): 99.1; S(7): 0.4; S(9): 0.4                                                                                     | 1,85           | -1,57           |
| Fam117b       | Q3U3E2                   | NGSPTPAGALAGAVGPPGGPGSR        | S(3): 99.4; T(5): 0.6; S(23): 0.0                                                                                    | 1,85           | -1,40           |
| Atp1a2        | Q6PIC6                   | CIELSSGSVK                     | S(5): 0.3; S(6): 94.3; S(8): 5.3                                                                                     | 1,77           | -1,85           |
| Gpkow         | Q53YU8                   | VEDLNTFGPK                     | T(6): 100.0                                                                                                          | 1,66           | -1,43           |
| Ralgapb       | E9Q0J2                   | TNSGISSASGGSTEPTTPDSEPAQALLR   | T(1): 0.0; S(3): 0.0; S(6): 0.0; S(7): 0.0; S(9): 0.0; S(12): 0.0; T(13): 0.0; T(16): 3.6; T(17): 95.5; S(20): 0.8   | 1,40           | -0,62           |
| Gm996         | A2AJA9                   | ASQGLATAPASPPVLR               | S(2): 0.0; T(7): 0.0; S(11): 100.0                                                                                   | 1,38           | -0,52           |
| Ap2a1         | P17426-2                 | RDTSSNDINGGVEPTSTVSTSPSADLLGLR | T(3): 0.0; S(4): 0.0; S(5): 0.0; T(15): 0.0; S(17): 0.0; T(18): 0.0; S(20): 0.6; T(21): 0.6; S(23): 98.3; S(25): 0.6 | 1,37           | -0,78           |
| Atp13a1       | Q9EPB4                   | EIHPLYLVMLEQS                  | Y(5): 0.0; S(13): 100.0                                                                                              | 1,31           | -0,30           |
| Sipa1l1       | Q8C0T5                   | LIDLESPTPESQK                  | S(6): 99.7; T(8): 0.3; S(11): 0.0                                                                                    | 1,30           | -1,29           |
| Setd1b        | Q8CFG0                   | FGGGGSRALSNLVPK                | S(7): 0.0; S(11): 100.0                                                                                              | 1,27           | -0,16           |
| Ywhaz         | P63101                   | TAFDEAIAELDTLSEESYK            | T(1): 0.0; T(12): 0.0; S(14): 100.0; S(17): 0.0; Y(18): 0.0                                                          | 1,19           | -1,35           |
| Ovos          | Q3UST5                   | AGQMANTLSALLQK                 | T(7): 9.7; S(9): 90.3                                                                                                | 1,15           | -1,45           |
| Anln          | Q8K212                   | DTTSPMELAALEK                  | T(2): 33.3; T(3): 33.3; S(4): 33.3                                                                                   | 1,11           | -1,67           |
| Fmn1          | A2AB60                   | GPGDVVSIIEILPGAAATPSGDDAQAPR   | S(7): 0.0; T(17): 92.6; S(19): 7.4                                                                                   | 1,09           | -0,20           |
| Sirt2         | Q8VDQ8-2                 | EHANIDAQSGSQAPNPSTTISPGK       | S(9): 0.0; S(11): 0.0; S(17): 0.0; T(18): 0.0; T(19): 0.0; S(21): 100.0                                              | 1,09           | -0,55           |
| Lmtk3         | Q5XJV6                   | ALVNGEPMSPAGEK                 | S(9): 100.0                                                                                                          | 1,08           | 0,12            |
| Arhgap33      | Q80YF9                   | AQQVAEQSQEQGGTTPAPHSPFR        | S(9): 0.0; T(16): 100.0; S(22): 0.0                                                                                  | 1,07           | -0,55           |
| Atp1a3        | Q6PIC6                   | VDNSSLTGESEPTQTRSPDCTHDNPLETR  | S(4): 16.7; S(5): 16.7; T(7): 16.7; S(10): 16.7; T(14): 16.7; S(16): 16.7; T(20): 0.0; T(27): 0.0                    | 1,07           | -0,01           |
| Dhx16         | Q04690-2                 | SSSGLATYSPPMGAVSER             | S(1): 0.0; S(2): 0.0; S(3): 0.0; T(7): 0.0; Y(8): 6.8; S(9): 93.2; S(16): 0.0                                        | 1,04           | -1,81           |
| Map1a         | Q9QYR6-2                 | VAELEEEQSQGSSYSYDWWK           | S(9): 100.0; S(12): 0.0; S(13): 0.0; S(14): 0.0; Y(15): 0.0; S(16): 0.0                                              | 0,98           | -0,61           |
| Trim46        | D3YXA6                   | EVLGQQGYIGHGGDPSSEPTSPASTPSTR  | Y(8): 0.0; S(16): 0.0; S(17): 0.0; T(20): 48.8; S(21): 48.8; S(24): 1.0; T(25): 1.0; S(27): 0.2; T(28): 0.2          | 0,97           | -0,75           |
| Pde10a        | Q8CA95-3                 | LTECFLSPLTDEK                  | T(2): 0.0; S(7): 100.0; S(9): 0.0; T(11): 0.0                                                                        | 0,92           | -0,43           |
| Snx27         | Q3UHD3-2                 | LTLQDQVDTLTFQSQSLR             | T(2): 0.0; T(9): 33.3; T(11): 33.3; S(14): 33.3; S(16): 0.0                                                          | 0,88           | -3,09           |
| Vdac1         | Q60829                   | ATLSEPGEEPQHPSPP               | T(2): 0.0; S(4): 0.0; S(14): 100.0                                                                                   | 0,88           | -0,13           |
| Map2          | P20357                   | ETSPETSLIQDEVALK               | T(2): 47.5; S(3): 47.5; T(6): 2.5; S(7): 2.5                                                                         | 0,87           | -1,31           |
| Sec22b        | O08547                   | NLGSINTELQDVQR                 | S(4): 93.0; T(7): 7.0                                                                                                | 0,87           | 0,02            |
| Crmp1         | P97427                   | SIPHITSDR                      | S(1): 100.0; T(6): 0.0; S(7): 0.0                                                                                    | 0,87           | -0,24           |
| Syne1         | Q6ZWQ5                   | RYSDFEWLK                      | Y(2): 0.0; S(3): 100.0                                                                                               | 0,86           | -0,07           |
| Bod1l         | E9Q6J5                   | GSDDVLVSGEVPECEVGHMSPR         | S(2): 0.0; S(8): 0.0; S(20): 100.0                                                                                   | 0,86           | -0,91           |
| 8430427H17Rik | Q3TXS7                   | TVGTPIASVPGSTNTGTVPGSEK        | T(1): 14.7; T(4): 85.1; S(8): 0.1; S(12): 0.0; T(13): 0.0; T(15): 0.0; T(17): 0.0; S(21): 0.0                        | 0,82           | 0,07            |
| Ctps1         | P70698                   | SGSSSPDSEITELK                 | S(1): 0.0; S(3): 0.0; S(4): 0.0; S(5): 0.2; S(8): 99.8;                                                              | 0,82           | -1,17           |

|               |          |                                |                                                                                    |      |       |
|---------------|----------|--------------------------------|------------------------------------------------------------------------------------|------|-------|
|               |          |                                | T(11): 0.0                                                                         |      |       |
| Wdr20a        | Q3UWE6   | RNSTDRPVSVTYR                  | S(3): 50.0; T(4): 50.0; S(6): 0.0; S(10): 0.0; T(12): 0.0; Y(13): 0.0              | 0,81 | -0,76 |
| Map7          | D3YWN7   | LSSSSATLLNSPDR                 | S(2): 0.0; S(3): 0.0; S(4): 0.0; S(5): 0.0; T(7): 0.0; S(11): 100.0                | 0,81 | -0,35 |
| Tnik          | B2RQ80   | KNSPGNGSALGPR                  | S(3): 99.5; S(8): 0.5                                                              | 0,80 | -0,99 |
| Ap4e1         | Q80UK0   | FNGSDGGVSWSPMDDELLAQPQVMK      | S(4): 1.9; S(9): 49.0; S(11): 49.0                                                 | 0,79 | -0,47 |
| Ubp2l         | Q80WJ7   | SETNWESPK                      | S(1): 0.0; T(3): 0.0; S(7): 100.0                                                  | 0,78 | -0,02 |
| Map1a         | Q9QYR6-2 | ELALSSPEDLTQDFEELK             | S(5): 4.0; S(6): 96.0; T(11): 0.0                                                  | 0,77 | -0,46 |
| Ablim3        | Q69ZR9-2 | DAQSPLLEVDAASVK                | S(4): 100.0; S(13): 0.0                                                            | 0,76 | -0,67 |
| Sgip1         | Q8VD37   | LPSISDLDSIFGPVLSPK             | S(3): 0.0; S(5): 0.0; S(9): 0.0; S(16): 100.0                                      | 0,76 | -0,15 |
| Lfn1          | Q2TUM3-3 | DGALFSFILDFLR                  | S(6): 100.0                                                                        | 0,75 | -0,98 |
| Pclo          | Q9QYX7   | SEGITKPSLQQPSPK                | S(1): 0.0; T(5): 0.0; S(8): 0.0; S(13): 100.0                                      | 0,74 | -0,80 |
| Mycbp2        | F6SMY7   | QVSTENDSTLVHR                  | S(3): 50.0; T(4): 50.0; S(8): 0.0; T(9): 0.0                                       | 0,74 | -0,27 |
| Chga          | P26339   | GELEHSQQEEDGEEAMVGTPQGLFPQGGK  | S(6): 100.0; T(19): 0.0                                                            | 0,73 | -0,52 |
| Dync1li1      | Q8R1B4   | DFESHITNYK                     | S(4): 0.0; T(7): 0.4; Y(9): 99.6                                                   | 0,72 | -0,06 |
| Recq4         | Q71M36   | TPSELHNDNFSLSTIAEGSHPNVR       | T(1): 49.4; S(3): 0.4; S(11): 49.4; S(13): 0.4; T(14): 0.4; S(19): 0.0             | 0,72 | -0,75 |
| Cacna1b       | A2AIR9   | EVAEVSPMSAANISIAAR             | S(6): 99.9; S(9): 0.1; S(14): 0.0                                                  | 0,71 | -0,18 |
| Maoa          | Q640R3   | QNSLEYMDQNDRLK                 | S(3): 99.7; Y(6): 0.3                                                              | 0,70 | -0,26 |
| Agap2         | Q3UHD9   | AISAFGPSASINGLVK               | S(3): 0.0; S(8): 50.0; S(10): 50.0                                                 | 0,70 | -0,23 |
| Npm1          | Q61937   | CGSGPVHISGQHLVAVEEDAEEDEDEEDVK | S(3): 0.0; S(9): 0.0; S(22): 100.0                                                 | 0,69 | -0,32 |
| Mki1          | D3YUI2   | FGSTGSTPPVSPTSER               | S(3): 0.0; T(4): 0.0; S(6): 0.7; T(7): 99.3; S(11): 0.0; T(13): 0.0; S(15): 0.0    | 0,68 | -0,67 |
| Lgalsl        | Q8VE70   | FLQTIK                         | T(4): 100.0                                                                        | 0,68 | -0,68 |
| Diras2        | Q5PR69-2 | ESSDNQPPSPSPEELK               | S(2): 0.2; S(3): 0.2; S(9): 99.5; S(11): 0.0                                       | 0,68 | -0,29 |
| Rmdn3         | Q3UJU9   | SHSLPNSLDYAQASER               | S(1): 0.0; S(3): 100.0; S(7): 0.0; Y(10): 0.0; S(14): 0.0                          | 0,68 | -0,58 |
| Dopey1        | Q8BL97-4 | VYVGNLGTGAGK                   | Y(2): 100.0; T(8): 0.0                                                             | 0,67 | 0,02  |
| Kcnd1         | Q03717   | STSSLPEPMEIVR                  | S(1): 0.0; T(2): 0.2; S(3): 9.9; S(4): 90.0                                        | 0,67 | -1,04 |
| Lpin2         | Q99P72   | ESAEFSVLEYSEMSSFNKSPK          | S(2): 0.0; S(6): 0.0; Y(10): 0.0; S(11): 0.0; S(15): 0.0; S(16): 6.7; S(20): 93.3  | 0,67 | -0,31 |
| Ppp1r9b       | Q6R5C6   | NQALEMSLR                      | S(8): 100.0                                                                        | 0,66 | -0,42 |
| Mark2         | E9QMP6   | RSSDQAVPAIPTSNSYSK             | S(2): 50.0; S(3): 50.0; T(12): 0.0; S(13): 0.0; S(15): 0.0; Y(16): 0.0; S(17): 0.0 | 0,66 | -0,44 |
| Apc           | B2RUG9   | QSVGSGSPVQTVLETR               | S(2): 0.0; S(5): 0.4; S(7): 99.5; T(11): 0.0; T(16): 0.0                           | 0,66 | -0,39 |
| Lrrc7         | Q80TE7   | SQSIDEIDVGTYK                  | S(1): 3.2; S(3): 96.8; T(11): 0.0; Y(12): 0.0                                      | 0,66 | -0,85 |
| Ppp1r1b       | Q60829   | AVQHLQITISNLSENQASEEDELGELR    | T(7): 0.0; S(9): 0.0; S(12): 0.0; S(17): 100.0                                     | 0,65 | -0,01 |
| Synj1         | E9Q7S0   | TPGPPSSQGSVPDTQPAQK            | T(1): 0.0; S(6): 0.7; S(7): 7.6; S(10): 91.7; T(14): 0.0                           | 0,65 | -0,42 |
| Pnck          | Q9QYG0   | TASLTSAAIDGSR                  | T(1): 0.0; S(3): 0.0; T(5): 0.1; S(6): 0.1; S(9): 98.6; S(13): 1.1                 | 0,64 | -0,62 |
| Dos           | E9QP85   | HASLDGASPYFK                   | S(3): 100.0; S(8): 0.0; Y(10): 0.0                                                 | 0,63 | -0,12 |
| Lppr4         | Q7TME0   | QTYELNDLNR                     | T(2): 50.0; Y(3): 50.0                                                             | 0,63 | -0,33 |
| Gdi1          | P50396   | MAGSAFDENMK                    | S(4): 100.0                                                                        | 0,62 | -0,08 |
| Iqsec2        | E9Q8N8   | MFSNPDNGSPAMTHR                | S(3): 0.0; S(9): 100.0; T(13): 0.0                                                 | 0,61 | -0,74 |
| Syngap1       | F6SEU4   | DLNSSIDLQSFMAR                 | S(4): 0.3; S(5): 99.7; S(10): 0.0                                                  | 0,61 | -0,13 |
| Col3a1        | P08121   | GENGSPGAPGAPGHPGPPGVPVPSGK     | S(5): 100.0; S(24): 0.0                                                            | 0,60 | -0,19 |
| Pik3c3        | E9QLS6   | DGDESSPILTSFELVK               | S(5): 4.8; S(6): 95.2; T(10): 0.0; S(11): 0.0                                      | 0,59 | -0,40 |
| Rab3a         | P63011   | MSESLDTADPAVTGAK               | S(2): 90.3; S(4): 4.8; T(7): 4.8; T(13): 0.0                                       | 0,59 | -0,25 |
| Hrh3          | E9Q7T5   | VQPHGSLEQCWK                   | S(6): 100.0                                                                        | 0,59 | -0,13 |
| Ndel1         | Q9EQG9   | SSSMSSIDLVSASDDVHR             | S(1): 0.3; S(2): 49.9; S(3): 49.9; S(5): 0.0; S(6): 0.0; S(11): 0.0; S(13): 0.0    | 0,58 | -0,29 |
| Dbnl          | Q62418-3 | VVTEKSPTDWALFTYEGNSNDR         | T(3): 33.3; S(6): 33.3; T(8): 33.3; T(14): 0.0; Y(15): 0.0; S(19): 0.0             | 0,58 | 0,15  |
| D430041D05Rik | D3YZ21   | QSLNSPSPGETEMDLLVTR            | S(2): 0.0; S(5): 100.0; S(7): 0.0; T(11): 0.0; T(18): 0.0                          | 0,58 | -0,10 |
| Atxn2l        | Q7TQH0-2 | EVDGLLTSDFMGPVSSK              | T(7): 0.0; S(8): 0.1; S(13): 98.7; S(16): 1.1; S(17): 0.1                          | 0,58 | -0,70 |



|                                          |          |                                |                                                                                                            |      |       |
|------------------------------------------|----------|--------------------------------|------------------------------------------------------------------------------------------------------------|------|-------|
| Prpf31                                   | Q8CC35-2 | ASPAEEEEAVPEWASCLK             | S(2): 100.0; S(15): 0.0                                                                                    | 0.58 | -0.83 |
| Rap1gap2                                 | Q5SSL4   | SQGGGDSVSPTPEGLAPGVEAGK        | S(1): 0.0; S(7): 0.1; S(9): 90.7; T(11): 9.2                                                               | 0.58 | -1.13 |
| Cadm4                                    | Q8R3Y8-2 | AGGASPAASSTTQPPAQHR            | S(5): 100.0; S(9): 0.0; S(10): 0.0; T(11): 0.0; T(12): 0.0                                                 | 0.58 | -0.40 |
| Uqcrh                                    | P99028   | SQTEEDCTEELFDLHAR              | S(1): 8.2; T(3): 91.8; T(8): 0.0                                                                           | 0.57 | 0.07  |
| Map1a                                    | Q9QYR6-2 | QLSPESLGLQFGELSLGK             | S(3): 88.6; S(6): 5.7; T(9): 5.7; S(16): 0.0                                                               | 0.57 | -0.05 |
| Fubp1                                    | Q3TSG4   | RGSFSSSENYWR                   | S(3): 100.0; S(5): 0.0; S(6): 0.0; Y(9): 0.0                                                               | 0.57 | -0.54 |
| Samd14                                   | Q8K031   | SLSIESLCPDEGR                  | S(1): 0.1; S(3): 99.9; S(6): 0.1                                                                           | 0.57 | -0.10 |
| Camk2d                                   | E9Q1T1   | ENFSGGTSLWQNI                  | S(4): 88.3; T(7): 5.8; S(8): 5.8                                                                           | 0.57 | 0.12  |
| Cspg5                                    | Q71M36   | TPSELHNDNFSLSTIAEGSHPNVR       | T(1): 99.4; S(3): 0.6; S(11): 0.0; S(13): 0.0; T(14): 0.0; S(19): 0.0                                      | 0.57 | -0.76 |
| Usp8                                     | Q80U78-2 | SMDELNHDFQALALEGR              | S(1): 100.0                                                                                                | 0.56 | -0.73 |
| Pnpo                                     | Q91WH7   | VDNSLGTGESEPTRSPECTHESPLETR    | S(4): 0.0; S(5): 0.0; T(7): 0.2; S(10): 0.7; T(14): 77.4; S(16): 15.3; T(20): 3.2; S(23): 3.2; T(27): 0.0  | 0.56 | -0.12 |
| Tmem163                                  | Q8C996   | GHAPSTAAPASPAPMSSSVQSDEER      | S(5): 0.0; T(6): 0.0; S(12): 0.0; S(17): 0.0; S(18): 0.0; S(19): 0.0; S(22): 100.0                         | 0.56 | -0.35 |
| Map1b                                    | P14873   | TPEEGGYSYSEIK                  | T(1): 100.0; Y(7): 0.0; S(8): 0.0; Y(9): 0.0; S(12): 0.0                                                   | 0.56 | -0.01 |
| Npat                                     | Q8BL99-5 | ASSPDDDVQVVFDLICK              | S(2): 4.7; S(3): 95.3                                                                                      | 0.56 | -1.43 |
| Ifi205a                                  | Q8CGA3   | LCLSTVDLEVK                    | S(4): 2.8; T(5): 97.2                                                                                      | 0.56 | -0.65 |
| Tpp2                                     | Q64511   | FDSNEEDTASVFAPSFGLK            | S(3): 100.0; T(8): 0.0; S(10): 0.0; S(15): 0.0                                                             | 0.56 | -0.23 |
| Ctnnd2                                   | E9QKH8   | TGSQHGPNAAAATFQR               | T(1): 8.4; S(3): 91.6; T(14): 0.0                                                                          | 0.55 | -0.97 |
| Dlgap2                                   | Q8BII1   | IQPQAGVPLGNSTLARPLDSPMCPVSPR   | S(12): 50.0; T(13): 50.0; S(20): 0.0; S(26): 0.0                                                           | 0.55 | -0.37 |
| Tjp1                                     | B9EHJ3   | IDSPGLKPASQQVYR                | S(3): 100.0; S(10): 0.0; Y(14): 0.0                                                                        | 0.55 | -0.28 |
| Gm15800                                  | E9Q2E4   | SMSAPSDLEMIGNEDLEFTR           | S(1): 47.3; S(3): 47.3; S(6): 5.4; T(19): 0.0                                                              | 0.54 | -1.11 |
| Synj1                                    | E9Q7S0   | TPGPPSSQGSVDTQPAAQK            | T(1): 0.0; S(6): 1.3; S(7): 10.2; S(10): 87.2; T(14): 1.3                                                  | 0.54 | -0.78 |
| Slc9a6                                   | A1L3P4   | LVLPMDDSEPALNSLDDTRHSPA        | S(8): 0.0; S(14): 0.0; T(18): 11.0; S(21): 89.0                                                            | 0.54 | -0.49 |
| Uncharacterized protein C15orf39 homolog | Q3TEI4   | GAAYQAGGLGSPYLR                | Y(4): 83.6; S(11): 13.8; Y(13): 2.6                                                                        | 0.54 | -0.57 |
| Cep170b                                  | Q80U49   | GASPVTPSTTPPPPTDPLTK           | S(3): 0.0; T(6): 0.0; S(8): 0.0; T(9): 0.0; T(10): 0.4; T(15): 99.6; T(20): 0.0                            | 0.54 | 0.18  |
| Fam117b                                  | Q3U3E2   | TSPTVATQTGASVTSTR              | T(1): 50.0; S(2): 50.0; T(4): 0.0; T(7): 0.0; T(9): 0.0; S(12): 0.0; T(14): 0.0; S(15): 0.0; T(16): 0.0    | 0.53 | -0.09 |
| Arhgap21                                 | B7ZCJ1   | DQGEVSPSEDEPFSSWPGPK           | S(7): 91.8; S(9): 8.2; S(15): 0.0                                                                          | 0.53 | -0.67 |
| Ank2                                     | Q8C878   | TLYLQSVTSIEER                  | T(1): 0.1; Y(3): 0.1; S(6): 49.3; T(8): 49.3; S(9): 1.2                                                    | 0.52 | -0.43 |
| Lgalsl                                   | Q8VED9   | LDDGHLNNSLGSVPQADVYFPR         | S(9): 0.0; S(12): 100.0; Y(19): 0.0                                                                        | 0.52 | -0.30 |
| Atp1a1                                   | Q8VDM4   | DKTPVQSQPSATTSPGADEK           | T(3): 0.0; S(7): 0.0; S(11): 0.0; T(13): 6.2; T(14): 93.8; S(16): 0.0                                      | 0.52 | 0.15  |
| Bnc2                                     | H3BLG6   | ATSGAATPVIATSK                 | T(2): 0.0; S(3): 0.0; T(7): 33.3; S(12): 33.3; T(13): 33.3                                                 | 0.52 | 0.00  |
| Pcm1                                     | Q9R078   | CSDVSELSSPPGPYHQEPYMSKPEER     | S(2): 0.0; S(5): 0.0; S(8): 0.3; S(9): 49.8; S(10): 49.8; Y(15): 0.0; Y(20): 0.0; S(22): 0.0               | 0.52 | -0.37 |
| 4932429P05Rik                            | A2ADI4   | YNMLNSAIIELFEFIR               | Y(1): 0.0; S(6): 100.0                                                                                     | 0.52 | -0.19 |
| Begain                                   | F8WIG2   | GDIYCSDPALYCPDER               | Y(4): 0.0; S(6): 100.0; Y(11): 0.0                                                                         | 0.52 | 0.26  |
| Pygo2                                    | Q3V0I2   | ALELEPLELEGSLAGSPPGLAPPPPHR    | S(12): 0.0; S(16): 100.0                                                                                   | 0.51 | 0.03  |
| Fbxl20                                   | Q9CZP3   | EQDLQVFDLESK                   | S(11): 100.0                                                                                               | 0.51 | -0.73 |
| Srcin1                                   | B1AQX6   | GEPDPERSSPMLSADDAEYPR          | S(8): 88.5; S(9): 11.4; S(14): 0.0; Y(20): 0.0                                                             | 0.51 | -0.08 |
| Mag                                      | P20917   | GESPELDLSYSHSDLGK              | S(3): 100.0; S(9): 0.0; Y(10): 0.0; S(11): 0.0; S(13): 0.0                                                 | 0.51 | 0.19  |
| Adcy5                                    | P84309   | APPAGGSGSAAAAAAGGTEVRPR        | S(7): 0.7; S(9): 49.7; S(10): 49.7; T(20): 0.0                                                             | 0.51 | -0.33 |
| Brsk1                                    | Q5RJI5   | MQVPTAEEMSSLTPESPSELAK         | T(5): 0.0; S(10): 0.0; S(11): 0.0; T(13): 0.0; S(16): 50.0; S(17): 50.0                                    | 0.51 | -0.09 |
| Pkn2                                     | G3UZM9   | EDVSNFDFEFTSEAPILTPPREPR       | S(4): 25.0; T(11): 25.0; S(12): 25.0; T(18): 25.0                                                          | 0.50 | -0.97 |
| Trim46                                   | D3YXA6   | EVLGQQGYIGHGGDPSSSEPTSPASTPSTR | Y(8): 0.0; S(16): 0.0; S(17): 0.0; T(20): 0.8; S(21): 97.5; S(24): 0.8; T(25): 0.8; S(27): 0.0; T(28): 0.0 | 0.50 | -0.78 |
| Lppr2                                    | Q8VCY8-2 | LSPWEDLSQAPTMDSPLEK            | S(2): 0.0; S(8): 0.0; T(12): 0.0; S(15): 100.0                                                             | 0.50 | -0.12 |
| 2010300C02Rik                            | E9Q3M9   | LQHSMASVASMEEGGCPR             | S(4): 0.0; S(8): 0.0; S(10): 100.0                                                                         | 0.50 | -0.01 |
| Camsap2                                  | Q8C1B1   | RFSPSQVPIQTR                   | S(3): 100.0; S(5): 0.0; T(11): 0.0                                                                         | 0.50 | -0.32 |

|          |          |                                          |                                                                                                                                                  |       |       |
|----------|----------|------------------------------------------|--------------------------------------------------------------------------------------------------------------------------------------------------|-------|-------|
| Gprin1   | Q3UNH4   | AETVSPGEVDAMTLGK                         | T(3): 0.3; S(5): 99.7; T(13): 0.0                                                                                                                | 0.49  | 0.00  |
| Hspb1    | P14602-3 | QLSSGVSEIR                               | S(3): 100.0; S(4): 0.0; S(7): 0.0                                                                                                                | 0.49  | -0.17 |
| Myo9b    | E9QKV6   | AQDKPESPSGSTQIQR                         | S(7): 100.0; S(9): 0.0; S(11): 0.0; T(12): 0.0                                                                                                   | 0.49  | -0.35 |
| C2cd2l   | Q80X80   | DEEQPELSTVEELIK                          | S(8): 6.0; T(9): 94.0                                                                                                                            | 0.49  | 0.09  |
| Lppr4    | Q7TME0   | MSLQVMDTEPEGQSPPR                        | S(2): 0.0; T(8): 0.0; S(14): 100.0                                                                                                               | 0.49  | -0.45 |
| Adcy9    | P51830   | VQVDGSIGRSPTDEIANLVPSVQYSDK              | S(6): 33.3; S(10): 33.3; T(12): 33.3; S(21): 0.0; Y(24): 0.0; S(25): 0.0                                                                         | 0.49  | -0.41 |
| Epn1     | Q80V94   | IIEQPECSSPVIETER                         | S(8): 50.0; S(9): 50.0; T(14): 0.0                                                                                                               | 0.48  | -0.42 |
| Prl8a1   | Q9DA80   | VSSQPAPSQER                              | S(2): 50.0; S(3): 50.0; S(8): 0.0                                                                                                                | 0.48  | -0.01 |
| Hdac4    | Q6NXL1   | VLPVYMNSLLK                              | Y(5): 100.0; S(8): 0.0                                                                                                                           | 0.48  | 0.30  |
| Mark1    | Q8VHG2   | DTTVISHSPNTSYDTALEAR                     | T(2): 0.0; T(3): 0.0; S(6): 0.0; S(8): 100.0; T(11): 0.0; S(12): 0.0; Y(13): 0.0; T(15): 0.0                                                     | 0.48  | -0.49 |
| Mtus2    | Q3UHD1   | NENVATLSVSSLER                           | T(6): 0.0; S(8): 0.0; S(10): 0.3; S(11): 99.7                                                                                                    | 0.48  | -0.12 |
| Rtn1     | Q8K0T0   | GSVSEDELIAAIK                            | S(2): 3.4; S(4): 96.6                                                                                                                            | 0.48  | -0.53 |
| Syn1     | O88935   | QSRPVAGGPGAPPAARPPASPQR                  | S(2): 0.0; S(20): 50.0; S(22): 50.0                                                                                                              | 0.47  | -0.29 |
| Mlt6     | B1AR09   | HSSGGGGGAGGGSSGGGGSSSASGGGGTGGGSGNSFLSGR | S(2): 2.4; S(3): 3.7; S(13): 6.3; S(14): 6.3; S(21): 23.3; S(22): 23.3; S(23): 11.6; S(25): 11.6; T(31): 3.7; S(35): 3.7; S(38): 1.7; S(41): 2.4 | 0.47  | 0.28  |
| Map1s    | Q8C008   | FTQGLEDLQSPGNGR                          | T(2): 0.0; S(10): 100.0                                                                                                                          | 0.47  | -0.51 |
| Map6d1   | Q149S1   | LLSEVEELNMSLR                            | S(3): 2.5; S(11): 97.5                                                                                                                           | 0.47  | -0.73 |
| Pcdh1    | F7BJK1   | SNSPLPSIQLQPQSPSASK                      | S(1): 0.0; S(3): 0.0; S(7): 0.0; S(14): 47.4; S(16): 47.4; S(18): 5.2                                                                            | 0.47  | -0.20 |
| Ttc7b    | E9Q6P5   | VEQALSEVASSLQSSAPK                       | S(6): 0.0; S(10): 6.4; S(11): 93.6; S(14): 0.0; S(15): 0.0                                                                                       | 0.47  | 0.03  |
| Tmx2     | D3Z2J6   | AVSWTFSEENVIR                            | S(3): 7.5; T(5): 91.9; S(7): 0.7                                                                                                                 | 0.47  | -0.72 |
| Syn1     | O88935   | QSRPVAGGPGAPPAARPPASPQR                  | S(2): 0.0; S(20): 1.3; S(22): 98.7                                                                                                               | 0.46  | -0.16 |
| Aff4     | Q9ES97-2 | ETTGAPTMSPDLEQEQLTIR                     | T(2): 0.0; T(3): 0.0; T(8): 1.6; S(10): 98.4; T(19): 0.0                                                                                         | -0.36 | 0.46  |
| Dennd4b  | Q3U1V8   | GIDGLAVAYGVAMNK                          | Y(9): 100.0                                                                                                                                      | -0.36 | -0.17 |
| Pycard   | Q9EP53-4 | GTPSGTATSPPPAPPCQDDCVHGSAAQASATAPR       | T(2): 0.0; S(4): 0.0; T(6): 0.5; T(9): 49.7; S(10): 49.7; S(26): 0.0; S(31): 0.0; T(33): 0.0                                                     | -0.36 | 0.01  |
| Nucks1   | Q80XQ2   | TISSSPSIESLPGGR                          | T(1): 0.0; S(3): 0.3; S(4): 1.8; S(5): 0.3; S(7): 95.8; S(10): 1.8                                                                               | -0.36 | -0.38 |
| Kcnrg    | Q2KN98   | KGSSGNASEVSVACLTER                       | S(3): 99.4; S(4): 0.6; S(8): 0.0; S(11): 0.0; T(16): 0.0                                                                                         | -0.36 | -0.47 |
| Hspa4l   | P48722   | QLTQDLLNSYIENEGK                         | T(3): 100.0; S(9): 0.0; Y(10): 0.0                                                                                                               | -0.36 | 0.36  |
| Map1a    | Q9QYR6-2 | MASPPPSGPPSAHTPFHQSPVEEK                 | S(3): 95.4; S(7): 2.3; S(11): 2.3; T(15): 0.0; S(20): 0.0                                                                                        | -0.36 | 0.22  |
| Add1     | Q9QYC0   | SPPDQSAVPNTPPSTPVKLEEDLPQEPTSR           | S(1): 0.0; S(6): 0.0; T(11): 97.8; S(14): 1.1; T(15): 1.1; T(28): 0.0; S(29): 0.0                                                                | -0.36 | 0.29  |
| Atg2b    | Q80X80   | NLGTPTSSTPRPSITPTK                       | T(4): 99.9; T(6): 0.0; S(7): 0.0; S(8): 0.0; T(9): 0.0; S(13): 0.0; T(15): 0.0; T(17): 0.0                                                       | -0.37 | -0.06 |
| Top2b    | Q64337   | LTPTTPESSTGTEDK                          | T(2): 88.8; T(4): 9.9; T(5): 1.2; S(8): 0.0; S(9): 0.0; S(10): 0.0; T(11): 0.0; T(13): 0.0                                                       | -0.37 | -0.09 |
| Rnmt     | Q9D0L7   | SAEDLTDGSDYDILNAEQLK                     | S(1): 32.2; T(6): 32.2; S(9): 3.4; Y(10): 32.2                                                                                                   | -0.37 | 0.21  |
| Gpsm1    | Q6GYP7   | HFSQSEDTGNEVFGALHEEQPLPR                 | S(3): 100.0; S(5): 0.0; T(8): 0.0                                                                                                                | -0.37 | -0.04 |
| Tmsb4x   | P20065-2 | TETQEKNPLPSK                             | T(1): 0.0; T(3): 100.0; S(11): 0.0                                                                                                               | -0.37 | -0.36 |
| Phkb     | Q7TQH0-2 | EVDGLLTSDPMGSPVSSK                       | T(7): 0.0; S(8): 0.0; S(13): 99.8; S(16): 0.2; S(17): 0.0                                                                                        | -0.38 | 0.27  |
| Ppme1    | Q8BVL3   | VTSSVPLPSGGTSSPSR                        | T(2): 0.0; S(3): 0.0; S(4): 0.0; S(9): 0.5; T(12): 6.3; S(13): 80.5; S(14): 6.3; S(16): 6.3                                                      | -0.38 | 0.38  |
| Tp53bp1  | P70399   | ASQEPFSPAEDVMETDLLEGLAANQDRPSK           | S(2): 0.0; S(7): 1.4; T(15): 98.6; S(29): 0.0                                                                                                    | -0.38 | 0.23  |
| Sptbn1   | Q62261   | AQTLPTS SVTITSESSPGKR                    | T(3): 0.0; T(6): 0.0; S(7): 0.0; T(10): 0.1; T(12): 4.4; S(13): 4.4; S(15): 45.6; S(16): 45.6                                                    | -0.38 | -0.09 |
| Echdc1   | Q9D8U8   | SVSVDLNVDPQLIDIPDALSER                   | S(1): 12.1; S(3): 87.9; S(11): 0.0; S(21): 0.0                                                                                                   | -0.38 | 1.04  |
| Ralgapa1 | Q6DID3   | ASEPVKEPVQTAQSPAPVEK                     | S(2): 0.0; T(11): 8.3; S(14): 91.7                                                                                                               | -0.39 | 0.03  |
| Usp10    | P52479-2 | TCDSPQNPVDFISGVPVDPSPFPR                 | T(1): 11.1; S(4): 88.9; S(13): 0.0; S(19): 0.0                                                                                                   | -0.39 | 0.41  |
| Trim3    | Q3B7Z2   | GATVLPANPPGSAGSGK                        | T(3): 100.0; S(12): 0.0; S(15): 0.0                                                                                                              | -0.39 | -0.08 |
| Map1a    | Q9QYR6-2 | EMTLQKSPK                                | T(3): 1.2; S(8): 98.8                                                                                                                            | -0.39 | 0.17  |

|         |          |                                        |                                                                                                                                  |       |       |
|---------|----------|----------------------------------------|----------------------------------------------------------------------------------------------------------------------------------|-------|-------|
| Map1b   | P14873   | TLEVVSQSVTGSAGHTPPYQSPTDEK             | T(1): 0.0; S(6): 94.1; S(8): 0.8; S(10): 0.8; T(12): 0.8; S(14): 0.8; T(18): 0.8; Y(20): 0.8; Y(21): 0.8; S(23): 0.0; T(25): 0.0 | -0,39 | 0,08  |
| Gbe1    | Q9D5W4   | QEEYSQSLLK                             | Y(4): 7.3; S(5): 92.0; S(7): 0.7                                                                                                 | -0,39 | -0,33 |
| Kif1b   | Q60575-2 | SHAVFTIVFTQK                           | S(1): 100.0; T(6): 0.0; T(10): 0.0                                                                                               | -0,40 | 0,46  |
| Tbr1    | Q64336   | SKLSPVLDGVSLELR                        | S(1): 0.0; S(4): 100.0; S(11): 0.0                                                                                               | -0,40 | 0,30  |
| Srcin1  | B1AQX9   | EVSGPNETSSPGSEKPSGSR                   | S(3): 0.0; T(8): 33.3; S(9): 33.3; S(10): 33.3; S(13): 0.0; S(17): 0.0; S(19): 0.0                                               | -0,40 | -0,30 |
| Atxn7l1 | B2RW07   | FALNSMVEK                              | S(5): 100.0                                                                                                                      | -0,41 | 0,18  |
| Map1a   | Q9QYR6-2 | MASPPSPGPPSAHTPFHQSPVEEK               | S(3): 100.0; S(7): 0.0; S(11): 0.0; T(15): 0.0; S(20): 0.0                                                                       | -0,41 | 0,46  |
| Tenm4   | Q3UHK1   | SLLAAEAASLQGAELER                      | S(1): 0.0; S(7): 89.1; S(10): 10.9                                                                                               | -0,41 | -0,03 |
| Dpysl5  | Q9EPR4-2 | SSLAETLDSTGSLDPQR                      | S(1): 0.0; S(2): 0.0; T(6): 0.1; S(9): 0.7; T(10): 49.6; S(12): 49.6                                                             | -0,41 | -0,28 |
| Scin    | Q60598   | QTPPASPPQIEDRPPSSPIYEDAAPFK            | T(2): 0.0; S(6): 0.2; S(8): 99.8; S(18): 0.0; S(19): 0.0; Y(22): 0.0                                                             | -0,41 | -0,09 |
| Map1a   | Q9QYR6-2 | APISLSQDPSPLNGSTTSCGPDR                | S(4): 0.0; S(6): 0.0; S(10): 100.0; S(16): 0.0; T(17): 0.0; T(18): 0.0; S(19): 0.0                                               | -0,42 | 0,16  |
| Map1a   | Q9QYR6-2 | EMTLDQKSPEK                            | T(3): 0.1; S(8): 99.9                                                                                                            | -0,42 | 0,14  |
| Larp1   | J3QNB1   | SLPTTVPESPNYR                          | S(1): 0.0; T(4): 0.1; T(5): 0.1; S(9): 97.3; Y(12): 2.5                                                                          | -0,43 | -0,22 |
| Supt3   | Q8WY4    | EALSPPEVQSVQEHLGYHSDSLR                | S(4): 100.0; S(10): 0.0; Y(17): 0.0; S(19): 0.0; S(21): 0.0                                                                      | -0,43 | 0,08  |
| Map1b   | P14873   | DYNASASTISPPSMEEDKFSK                  | Y(2): 0.0; S(5): 0.0; S(7): 0.6; T(8): 0.6; S(10): 98.8; S(13): 0.0; S(14): 0.0; S(21): 0.0                                      | -0,43 | -0,24 |
| C2cd2l  | Q80X50   | RYPSSISSPQK                            | Y(2): 0.0; S(4): 6.1; S(5): 0.5; S(7): 0.5; S(8): 6.1; S(9): 86.9                                                                | -0,43 | 0,17  |
| Synpo   | Q8CC35-2 | DRASPAAEAEVPEWASCLK                    | S(4): 100.0; S(17): 0.0                                                                                                          | -0,43 | 0,55  |
| Trappc8 | E9PWG2   | NSDSNLLSLDGLDNEVK                      | S(2): 50.0; S(4): 50.0; S(8): 0.1                                                                                                | -0,43 | 0,26  |
| Gprin3  | Q8BVY4   | IAQDLINSIDQTGELLAMFEDNELDDVK           | S(8): 50.0; T(12): 50.0                                                                                                          | -0,43 | 0,76  |
| Astn2   | E9Q8T4   | TGAAAGAGAGTGAGAGAAAAAASAPGSAGSAGTAAESR | T(1): 0.0; T(11): 0.5; S(23): 7.1; S(26): 59.9; S(29): 7.1; S(32): 20.0; T(35): 2.7; S(39): 2.7                                  | -0,43 | 0,68  |
| Eml2    | E9QK48   | VGGYATSPSSPK                           | Y(4): 0.0; T(6): 0.3; S(7): 33.2; S(9): 33.2; S(10): 33.2                                                                        | -0,44 | 2,07  |
| Otud7a  | Q8R550   | SIEVENDFLPVEK                          | S(1): 100.0                                                                                                                      | -0,44 | 0,44  |
| Htt     | P42859   | SGSIVELLAGGGSSCSPVLSR                  | S(1): 50.0; S(3): 50.0; S(13): 0.0; S(14): 0.0; S(16): 0.0; S(20): 0.0                                                           | -0,44 | 0,54  |
| Map1b   | P14873   | LGGDVSPQTQIDVQFSGFK                    | S(6): 50.0; T(8): 50.0; S(13): 0.0; S(17): 0.0                                                                                   | -0,45 | 0,04  |
| Dlg4    | Q62073   | SIQDLTVTGTEPGQVSSR                     | S(1): 100.0; T(6): 0.0; T(8): 0.0; T(10): 0.0; S(16): 0.0; S(17): 0.0                                                            | -0,45 | -0,15 |
| Magi2   | Q9WVF8   | RGSFMFYDEDGLAHEFYEETIVTK               | S(3): 90.5; Y(6): 9.5; Y(17): 0.0; T(20): 0.0; T(23): 0.0                                                                        | -0,46 | -0,14 |
| Snap91  | Q61423   | FYYSEEDHGDGCSYTDLLPQDDGGGGYSSVR        | Y(2): 2.2; Y(3): 11.3; S(4): 11.3; S(13): 61.8; Y(14): 11.3; T(15): 2.2; Y(28): 0.0; S(29): 0.0; S(30): 0.0                      | -0,46 | -0,46 |
| Pnn     | O35691   | SLSPGKININSQEVEK                       | S(1): 0.3; S(3): 99.7; S(11): 0.0                                                                                                | -0,46 | 0,36  |
| Zzef1   | Q5SRX1   | AAETVPDLPSPTPEAPASNTSTR                | T(4): 0.0; S(10): 38.5; T(13): 38.5; S(20): 1.4; T(22): 7.2; S(23): 7.2; T(24): 7.2                                              | -0,47 | -0,01 |
| Syt5    | Q9R0L6   | VTNAISPESSPGVGR                        | T(2): 0.0; S(6): 100.0; S(9): 0.0; S(10): 0.0                                                                                    | -0,47 | -0,09 |
| Plexn3  | Q9QXY6   | DKPMYDEIFYTLSPVDGK                     | Y(5): 0.0; Y(10): 0.0; T(11): 0.0; S(13): 100.0                                                                                  | -0,47 | 0,09  |
| Aldoc   | P05063   | GILAADES VGSMK                         | S(8): 100.0; S(11): 0.0                                                                                                          | -0,49 | 0,08  |
| Lsm14a  | Q8K2F0   | SESPPLSEPK                             | S(1): 0.0; S(3): 100.0; S(8): 0.0                                                                                                | -0,49 | 0,37  |
| Dnahc8  | Q91XM9-7 | NLSQIENVHGYVLQSHISPLK                  | S(3): 0.0; Y(11): 0.0; S(15): 1.0; S(18): 99.0                                                                                   | -0,50 | 0,50  |
| Zc3hc1  | H3BKM2   | SMGTGDSAGVEVPSSPLR                     | S(1): 0.0; T(4): 0.0; S(7): 0.0; S(14): 50.0; S(15): 50.0                                                                        | -0,50 | 0,24  |
| Slc1a4  | O35874   | SEETSLVTHQNPAGPVAIAPLESK               | S(1): 0.0; T(5): 0.7; S(6): 99.3; T(10): 0.0; S(26): 0.0                                                                         | -0,51 | 0,34  |
| Aatk    | Q80Y17   | DIILAPESCEGSPSSAHSK                    | S(8): 0.0; S(12): 93.2; S(14): 6.3; S(15): 0.5; S(18): 0.0                                                                       | -0,51 | 0,26  |
| Bora    | Q8BRF7   | VNLEESTGVENSAPGARPK                    | S(6): 0.0; T(7): 0.0; S(12): 100.0                                                                                               | -0,53 | 1,06  |
| Usp45   | E9Q4D8   | ISLSSAPQLEPLVVELSSPGPLTSALFL           | S(2): 69.4; S(4): 15.3; S(5): 15.3; S(17): 0.0; S(18): 0.0; T(23): 0.0; S(24): 0.0                                               | -0,53 | 0,31  |
| Gpr162  | Q3UMB5   | VASPVNVTGLHTLSR                        | S(3): 100.0; T(9): 0.0; T(12): 0.0; S(14): 0.0                                                                                   | -0,54 | -0,06 |
| Trank1  | Q8BTI8   | SGTPPRPGSVTNMQADECTATPQR               | S(1): 0.0; T(3): 100.0; S(9): 0.0; T(11): 0.0; T(19): 0.0; T(21): 0.0                                                            | -0,54 | -0,01 |
| Rem2    | E9Q4D5   | QASPLGTPTPEADTLLK                      | S(3): 100.0; T(7): 0.0; T(9): 0.0; T(14): 0.0; T(15): 0.0                                                                        | -0,54 | -0,06 |

|               |          |                               |                                                                                                                     |       |       |
|---------------|----------|-------------------------------|---------------------------------------------------------------------------------------------------------------------|-------|-------|
| Abca2         | A2AJ26   | QPAEPGTSQEPGLASSPSGCP         | T(7): 0.3; S(8): 0.3; S(15): 49.5; S(16): 49.5; S(18): 0.3                                                          | -0.55 | 0.61  |
| Twf1          | Q91YM2   | AGSPLCNSNLQDSEEDVEPPSYHLFR    | S(3): 100.0; S(8): 0.0; S(13): 0.0; S(21): 0.0; Y(22): 0.0                                                          | -0.55 | -0.08 |
| Mtfr1l        | Q9CW07   | SFSLPADPILQAAK                | S(1): 3.8; S(3): 96.2                                                                                               | -0.56 | 0.09  |
| Ndrp1         | Q62419   | EASSRPK                       | S(3): 93.4; S(4): 6.6                                                                                               | -0.56 | -0.33 |
| Yap1          | P46938-2 | GDSETDLEALFNAVMNPK            | S(3): 50.0; T(5): 50.0                                                                                              | -0.57 | 0.25  |
| Arhgap32      | Q810B9   | LFEDSGGNSGGSGGGRPTLSSPEK      | S(5): 0.0; S(9): 0.3; S(12): 0.3; T(19): 33.1; S(21): 33.1; S(22): 33.1                                             | -0.58 | -0.25 |
| Cep170b       | Q80T23   | GASSPDMESYGGGLFDMVK           | S(3): 6.9; S(4): 93.1; S(10): 0.0; Y(11): 0.0                                                                       | -0.58 | 0.39  |
| Pml           | D3YXR5   | ATSPPHLDGTSNPESTVPEK          | T(2): 9.6; S(3): 90.4; T(10): 0.0; S(11): 0.0; S(15): 0.0; T(16): 0.0                                               | -0.58 | -0.21 |
| Camsap2       | Q8C0T7   | SEGTLQGAATTSTARR              | S(1): 0.0; T(4): 0.1; T(10): 98.7; T(11): 1.1; S(12): 0.0; T(13): 0.0                                               | -0.58 | 0.15  |
| Mark3         | Q02357-6 | LNTPPPLAEEGLASR               | T(3): 100.0; S(15): 0.0                                                                                             | -0.58 | 0.33  |
| Gm15800       | E9Q2E4   | SMSAPSDLEMIGNEDLEFTR          | S(1): 49.9; S(3): 49.9; S(6): 0.1; T(19): 0.0                                                                       | -0.59 | 0.39  |
| Cend1         | Q9JK24   | EESRAVFLQR                    | S(3): 100.0                                                                                                         | -0.59 | -0.36 |
| Sptbn2        | Q68FF6   | SMDSSDLSDGAVTLQEYLELK         | S(1): 99.9; S(4): 0.0; S(5): 0.0; S(8): 0.0; T(13): 0.0; Y(17): 0.0                                                 | -0.60 | -0.11 |
| Trappc12      | Q8K2F8   | KSPTMEQAVQTASAHLPAAPVGR       | S(2): 99.4; T(4): 0.6; T(11): 0.0; S(13): 0.0                                                                       | -0.60 | 0.08  |
| Map1b         | P14873   | DYNASASTISPPSSMEEDK           | Y(2): 0.0; S(5): 0.0; S(7): 0.0; T(8): 0.0; S(10): 100.0; S(13): 0.0; S(14): 0.0                                    | -0.61 | 0.68  |
| Adrbk2        | Q3UYC0   | RSSLPNGEGLQLK                 | S(2): 0.2; S(3): 99.8                                                                                               | -0.61 | 0.21  |
| Gm15800       | E9Q2E4   | TEGTPPPGQPAK                  | T(1): 0.0; T(4): 100.0                                                                                              | -0.62 | 0.10  |
| Ehd3          | Q9QXY6   | DKPMYDEIFYTLSPVDGK            | Y(5): 0.0; Y(10): 0.1; T(11): 8.1; S(13): 91.9                                                                      | -0.62 | -0.42 |
| Map2          | P20357   | YTVPLPSPVQDSENLSGESGSFYEGTDDK | Y(1): 0.0; T(2): 0.0; S(7): 99.7; S(12): 0.2; S(16): 0.0; S(19): 0.0; S(21): 0.0; Y(23): 0.0; T(26): 0.0            | -0.62 | 0.10  |
| Rgs6          | F6WDS8   | SVYGVTDQTSQSPVHIPSQPIR        | S(1): 0.1; Y(3): 0.1; T(6): 2.4; T(9): 2.4; S(11): 13.6; S(13): 81.4; S(19): 0.0                                    | -0.62 | -0.03 |
| Rbm25         | B2RY56   | LGASNSPGQPNVSK                | S(4): 1.3; S(6): 98.7; S(12): 0.0                                                                                   | -0.63 | 0.00  |
| Cttn          | Q60575-2 | GDSLILEHQWELEK                | S(3): 100.0                                                                                                         | -0.63 | -0.06 |
| Mpp5          | Q9JL04   | TSSGSDTDIYFHSATEQEDLLSDIQQAIR | T(1): 0.0; S(2): 0.3; S(3): 49.7; S(5): 49.7; T(7): 0.3; Y(10): 0.0; S(11): 0.0; S(14): 0.0; T(16): 0.0; S(23): 0.0 | -0.63 | 0.30  |
| Add2          | Q9QY81   | ELASPLALTPR                   | S(4): 0.8; T(9): 99.2                                                                                               | -0.63 | 0.29  |
| Brsk1         | Q5RJ15   | SPVFSFSPGAGDEAR               | S(1): 99.9; S(5): 0.1; S(7): 0.0                                                                                    | -0.64 | -0.08 |
| Nsd1          | O88491   | LMTAQNLASYSR                  | T(3): 87.8; S(9): 0.4; Y(10): 11.8                                                                                  | -0.65 | 0.06  |
| Braf          | F6SZ47   | SSSAPNVHINTIEPVNIDDLIR        | S(1): 47.2; S(2): 47.2; S(3): 5.6; T(11): 0.0                                                                       | -0.65 | -0.10 |
| Nim1          | Q8BHE7   | DGATLASSDVASYRAK              | T(4): 0.0; S(7): 0.0; S(8): 0.0; S(12): 50.0; Y(13): 50.0                                                           | -0.65 | -0.27 |
| Gorasp2       | Q99JP7   | LPSSSSEMGSQDGSPLR             | S(3): 0.0; S(4): 0.0; S(5): 0.0; S(6): 0.0; S(10): 0.0; S(14): 100.0                                                | -0.65 | -0.13 |
| Mark2         | E9QMP6   | RSSDQAVPAIPTSNSYSK            | S(2): 0.5; S(3): 99.5; T(12): 0.0; S(13): 0.0; S(15): 0.0; Y(16): 0.0; S(17): 0.0                                   | -0.66 | -0.03 |
| Ppp1r1b       | Q60823   | YFDDEFTAQSITITPPDR            | Y(1): 0.0; T(7): 0.0; S(10): 0.0; T(12): 0.2; T(14): 99.8                                                           | -0.66 | 0.54  |
| Kank3         | Q9Z1J2-2 | AAEQEAQLLSQLK                 | S(10): 100.0                                                                                                        | -0.67 | 0.06  |
| Tekt4         | Q0VGU4   | DPEEDDRSEEEALASLLQELR         | S(8): 100.0; S(16): 0.0                                                                                             | -0.68 | 0.03  |
| Mfsd6         | Q8CA95-3 | GEETAMWISGPGPAPSKSTPEK        | T(4): 0.0; S(9): 0.7; S(16): 0.7; S(18): 0.7; T(19): 97.8                                                           | -0.69 | -0.25 |
| Stard8        | Q8K019-2 | ELFDYSPPLHK                   | Y(5): 5.0; S(6): 95.0                                                                                               | -0.69 | 0.57  |
| Heatr5b       | Q8C4T8   | LTESMTNVLEGSDMDQDVESPAIHQPK   | T(2): 0.0; S(4): 0.0; T(6): 0.0; S(13): 0.6; S(20): 99.4                                                            | -0.70 | 0.25  |
| Rilpl1        | Q9JIX8-4 | SQSPSPPLPEDLEK                | S(1): 0.3; S(3): 99.3; S(5): 0.3                                                                                    | -0.70 | 0.09  |
| Abcb5         | B5X0E4   | EVADAANIHSFIEGLPR             | S(10): 100.0                                                                                                        | -0.70 | 0.69  |
| Comt          | O88587-2 | AVYQGGSSPVK                   | Y(3): 0.0; S(8): 50.0; S(9): 50.0                                                                                   | -0.70 | 0.39  |
| Grid1         | Q61624   | AGIATQFSTANGQVNL              | T(5): 49.8; S(8): 49.8; T(9): 0.5                                                                                   | -0.70 | -0.18 |
| Sgip1         | Q8VCY8-2 | LSPWEDLSQAPTMDSPLEK           | S(2): 0.0; S(8): 0.0; T(12): 0.4; S(15): 99.6                                                                       | -0.70 | 0.03  |
| Ankrd6        | A2ANY8   | VLEAGADTTIVNNILR              | T(9): 50.0; T(10): 50.0                                                                                             | -0.70 | -0.22 |
| Crkl          | P47941   | YPSPPVGSVAPNLPTAENLEYVR       | Y(1): 12.0; S(3): 75.6; S(8): 12.0; S(10): 0.4; T(16): 0.0; Y(23): 0.0                                              | -0.73 | 0.73  |
| 4921517D22Rik | Q8CE22-4 | IIQPSLQAPWQR                  | S(5): 100.0                                                                                                         | -0.74 | 0.63  |
| Zc3h13        | E9Q784   | SLSPSHLTEDR                   | S(1): 0.4; S(3): 99.6; S(5): 0.0; T(8): 0.0                                                                         | -0.75 | 0.48  |

|         |          |                                     |                                                                                    |       |       |
|---------|----------|-------------------------------------|------------------------------------------------------------------------------------|-------|-------|
| Fam195b | Q3UED7   | LYFLDMVTEDAKLLK                     | Y(2): 100.0; T(8): 0.0; T(13): 0.0                                                 | -0,76 | 0,57  |
| Arhgef7 | Q9ES00   | LAGGQTSQPTTPLTSPQR                  | T(6): 0.0; S(7): 0.0; T(10): 0.0; T(11): 0.0; T(14): 9.5; S(15): 90.5              | -0,78 | 0,00  |
| Scn2a1  | B1AWN6   | SSSYHVSMDLLEDPTSR                   | S(1): 10.2; S(2): 10.2; S(3): 1.5; Y(4): 1.5; S(7): 76.5; T(15): 0.0; S(16): 0.0   | -0,80 | -0,23 |
| Map1b   | P14873   | VLSPLRSPLLGSESPYEDFLSADSK           | S(3): 0.8; S(7): 96.9; S(13): 0.8; S(15): 0.8; Y(17): 0.8; S(22): 0.0; S(25): 0.0  | -0,81 | 0,34  |
| Klc2    | D3YXZ3   | DSLDDLPNEDEQSPAPSPGGDVAAQHGGYEIPAR  | S(2): 0.0; S(14): 100.0; S(18): 0.0; Y(31): 0.0                                    | -0,85 | 0,42  |
| Dchs1   | F6TP58   | ITFNLLAGGDGLFTVDPPTGHVR             | T(2): 0.1; T(14): 43.8; T(18): 12.3; T(19): 43.8                                   | -1,01 | -0,28 |
| Ubxn1   | Q922S4   | EFFSQGDLEK                          | S(4): 100.0                                                                        | -1,01 | 0,27  |
| CA198   | Q8C3Q5-2 | SSSLTPGLGGPDSMAPR                   | S(1): 0.1; S(2): 8.8; S(3): 82.4; T(5): 8.8; S(13): 0.0                            | -1,03 | -0,22 |
| Ccny    | Q8BGT8   | LDHALSSPSSPCEEIK                    | S(6): 0.0; S(7): 0.0; S(9): 0.2; S(10): 99.8                                       | -1,05 | -0,49 |
| Tmem145 | E9PUE6   | VVTMAEPGAASPPPPAR                   | T(3): 0.0; S(11): 100.0                                                            | -1,13 | 0,08  |
| Bckdha  | Q3U3E2   | RNGSPTPAGALAGGAVGPPGGPGSR           | S(4): 19.2; T(6): 80.8; S(24): 0.0                                                 | -1,13 | 1,24  |
| Khsrp   | Q3U0D9-4 | ELLLSGMPEIDVNDWIK                   | S(5): 100.0                                                                        | -1,17 | 0,83  |
| Dnaja1  | P63037   | NVVHQLSVTLEDLYNGATR                 | S(7): 100.0; T(9): 0.0; Y(14): 0.0; T(18): 0.0                                     | -1,22 | 0,20  |
| Sptbn1  | Q62108-3 | GNSGLGFSIAGGTDNPHIGDDPSIFITK        | S(3): 33.3; S(8): 33.3; T(13): 33.3; S(23): 0.0; T(27): 0.0                        | -1,25 | 1,04  |
| Xrn2    | Q9DB05   | AIDIYEQVGTSAMDSPLLK                 | Y(5): 0.0; T(10): 0.0; S(11): 0.0; S(15): 100.0                                    | -1,33 | 0,96  |
| Crmp1   | Q6P1B3   | QEESQQPLTDLSPAGVTVLGAFGDSPTTPDHEEPR | S(4): 0.0; T(9): 0.0; S(12): 0.0; T(17): 0.0; S(25): 46.7; T(27): 46.7; T(29): 6.5 | -1,39 | 1,34  |
| Kif1b   | Q60520   | VEDALSYLDQVK                        | S(6): 0.1; Y(7): 99.9                                                              | -2,20 | 0,33  |
| Ehd3    | Q9QXW9   | NHPGSDTSPEAEASSGGGVALK              | S(5): 6.3; T(7): 6.3; S(8): 87.5; S(14): 0.0; S(15): 0.0                           | -2,43 | 0,58  |



**Supplementary Table S3. Proteins up and down phosphorylated in the cerebellum of Tg(*Dyrk1a*) mice and reverted by L41 treatment.**

| Gene name | Protein Group Accessions | Sequence                       | phosphoRS Site Probabilities                                                                | TgDyrk1a vs WT | TgDyrk1a +/-L41 |
|-----------|--------------------------|--------------------------------|---------------------------------------------------------------------------------------------|----------------|-----------------|
| Dst       | E9QL23                   | SESNSITATQPTLAK                | S(1): 49.4; S(3): 49.4; S(5): 1.1; S(6): 0.0; T(8): 0.0; T(10): 0.0; T(13): 0.0             | 3,45           | -2,73           |
| Stxbp5    | D3Z2Q2                   | RPVSVSPSSSQEISENQYAVICSEK      | S(4): 1.2; S(6): 95.4; S(8): 1.2; S(9): 1.2; S(10): 1.2; S(14): 0.0; Y(18): 0.0; S(23): 0.0 | 2,94           | -2,21           |
| Acot11    | Q8VHQ9                   | SISHPESGDPPTMAEGEGYR           | S(1): 100.0; S(3): 0.0; S(7): 0.0; T(12): 0.0; Y(19): 0.0                                   | 2,75           | -2,76           |
| Mrip1     | P97434-2                 | DFASEAPTAPLSDACPLSPHR          | S(4): 0.0; T(8): 0.0; S(12): 0.0; S(18): 100.0                                              | 2,12           | -0,71           |
| Sgip1     | Q8VD37                   | HVPSPLNLEEVQK                  | S(4): 100.0                                                                                 | 2,10           | -1,78           |
| Gbf1      | Q6A099                   | ADAPDAGAQSSELPSYHQNDVSLDR      | S(10): 100.0; S(12): 0.0; S(16): 0.0; Y(17): 0.0; S(23): 0.0                                | 1,57           | -0,32           |
| Dclk2     | Q6PGN3-3                 | SSSSSPTSPGSFR                  | S(1): 0.0; S(2): 0.0; S(3): 0.0; S(4): 0.0; S(5): 99.0; T(7): 0.5; S(8): 0.5; S(11): 0.0    | 1,52           | -1,25           |
| Pcyt1a    | P49586                   | AVTCDISEDEED                   | T(3): 0.0; S(7): 100.0                                                                      | 1,50           | 0,07            |
| Rgl3      | Q3UYI5                   | NREPPPPGSPASPSPSTK             | S(9): 100.0; S(13): 0.0; S(18): 0.0; S(20): 0.0; T(21): 0.0                                 | 1,44           | -1,37           |
| Ssrp1     | A2AW05                   | EGINPGYDDYADSEDEQHDAYLER       | Y(7): 0.0; Y(10): 0.0; S(13): 100.0; Y(21): 0.0                                             | 1,37           | 0,00            |
| Srgap2    | Q91Z67                   | TSPVVAPTSEPSSPLHTQLLK          | T(1): 0.0; S(2): 0.0; T(8): 0.0; S(9): 0.0; S(12): 49.6; S(13): 49.6; T(17): 0.7            | 1,33           | -0,93           |
| Epb4.1    | A2AD32                   | TLNINGQVPTGDGVSTVSTGP          | T(1): 100.0; T(10): 0.0; S(15): 0.0; T(16): 0.0; S(18): 0.0; T(19): 0.0                     | 1,32           | -0,89           |
| Ehd2      | Q8BH64                   | GPDEAIEDGEGSEDDAEWVVTK         | S(13): 100.0; T(22): 0.0                                                                    | 1,20           | -0,55           |
| Ctage5    | H3BK44                   | AFLSPPTLLEGLR                  | S(4): 99.3; T(7): 0.7                                                                       | 1,18           | -0,37           |
| Caskin1   | Q6P9K8-2                 | HISSSQELLGDGPPGSPMSR           | S(3): 6.2; S(4): 6.2; S(5): 87.6; S(18): 0.0; S(21): 0.0                                    | 1,09           | -0,91           |
| Mier1     | Q5UAK0-4                 | APSPPTASNSNSQSEK               | S(3): 0.8; T(7): 90.7; S(9): 8.5; S(11): 0.0; S(12): 0.0; S(14): 0.0; S(16): 0.0            | 1,09           | -1,33           |
| Ifi44     | Q8BV66                   | DMLLSALK                       | S(6): 100.0                                                                                 | 1,08           | -0,49           |
| Usp9x     | Q4FE56                   | AQENYEGGEEVSPQTK               | Y(5): 0.0; S(12): 100.0; T(16): 0.0                                                         | 1,07           | -0,51           |
| Map7d2    | A2AG50                   | SNSLDDSTEDVQSMVSPVSK           | S(1): 46.0; S(3): 46.0; S(7): 4.0; T(8): 4.0; S(13): 0.0; S(17): 0.0; S(20): 0.0            | 1,04           | -0,94           |
| Dok1      | P97465                   | GFSSDTALYSQVQK                 | S(3): 49.6; S(4): 49.6; T(6): 0.7; Y(9): 0.0; S(10): 0.1                                    | 1,03           | 0,02            |
| Kcnd1     | Q03719                   | QNGGLEDSGSGDGMCLCVR            | S(8): 1.7; S(10): 98.3                                                                      | 1,02           | -0,56           |
| Tbc1d5    | Q80XQ2                   | EFTGSPPPSATAK                  | T(3): 0.5; S(5): 99.5; S(9): 0.0; T(11): 0.0                                                | 1,02           | -0,81           |
| Scap      | Q6GQT6                   | RDSCGGGAFETQENWER              | S(3): 100.0; T(11): 0.0                                                                     | 1,02           | -0,71           |
| Nop2      | Q922K7                   | AQDATAGVLWNEEDTEDEDDGVSPEHPR   | T(5): 0.0; T(15): 100.0; S(25): 0.0; S(28): 0.0                                             | 0,99           | -0,91           |
| Arhgef6   | Q8K4I3                   | KDSVPQVLLPEEEK                 | S(3): 100.0                                                                                 | 0,99           | -0,62           |
| Zfml      | E9QML5                   | QSSVTQVTEQSPK                  | S(2): 0.0; S(3): 0.0; T(5): 0.0; T(8): 0.0; S(11): 100.0                                    | 0,99           | -0,21           |
| Dync1i2   | O88487                   | SVSTPSEAGSQDSDGAVGSR           | S(1): 0.0; S(3): 0.0; T(4): 0.0; S(6): 0.0; S(10): 12.1; S(13): 86.1; S(20): 1.8            | 0,97           | -1,03           |
| Cadm4     | Q8R464                   | GSYLTHEASGLDEQGEAR             | S(2): 0.0; Y(3): 0.0; T(5): 50.0; S(9): 50.0                                                | 0,97           | -1,10           |
| Tom1l2    | Q5SRX1                   | AAETVPDLPSPPTEAPAPASNTSTR      | T(4): 0.0; S(10): 38.8; T(13): 38.8; S(20): 1.4; T(22): 7.0; S(23): 7.0; T(24): 7.0         | 0,95           | -0,11           |
| Stx1a     | Q35526                   | TAKSDDDDDVTVTVDR               | T(1): 0.0; S(5): 100.0; T(12): 0.0; T(14): 0.0                                              | 0,93           | -0,74           |
| Ddx55     | E9Q9T6                   | TVQLTDLGVSDLEEDS               | T(1): 0.0; T(5): 0.0; S(10): 100.0; S(16): 0.0                                              | 0,90           | -0,61           |
| Arid1a    | E9QAQ7                   | SHHAPMSPGSSGGGQPLAR            | S(1): 0.0; S(7): 100.0; S(10): 0.0; S(11): 0.0                                              | 0,89           | -0,48           |
| Rnpep     | Q8VCT3                   | KPFVYTQQAFLNR                  | Y(5): 100.0; T(6): 0.0                                                                      | 0,85           | -1,41           |
| Map1b     | P14873                   | TTEAAATAVGAATTAAVVAAAGIAASGPVK | T(1): 0.0; T(2): 0.2; T(7): 16.3; T(11): 83.3; T(14): 0.2; T(15): 0.0; S(27): 0.0           | 0,83           | -0,66           |
| Zswim8    | Q3UHH1-3                 | KQSAGPNSPTGGGGGGSGGTR          | S(3): 0.0; S(8): 99.8; T(10): 0.2; S(18): 0.0; T(21): 0.0                                   | 0,82           | 0,02            |

|         |          |                                |                                                                                                           |      |       |
|---------|----------|--------------------------------|-----------------------------------------------------------------------------------------------------------|------|-------|
| Pkp4    | Q68FH0   | TEPEQGTLYSPEQTSLHESEGLGNSR     | T(1): 0.0; T(7): 0.0; Y(9): 0.0; S(10): 0.4; T(14): 49.8; S(15): 49.8; S(19): 0.0; S(22): 0.0; S(26): 0.0 | 0.82 | -1.08 |
| Syn1    | O88935   | QTSQQPAGPPAQRPPPPQGGPPQPGPGPQR | T(2): 15.6; S(3): 84.4                                                                                    | 0.80 | -0.73 |
| Map1a   | Q9QYR6   | MASPPPSGPPSAAHTPFHQSPVEEK      | S(3): 11.2; S(7): 11.2; S(11): 77.5; T(15): 0.0; S(20): 0.0                                               | 0.79 | -0.28 |
| Htt     | P42859   | ASDPSPATPDESIVAMER             | S(2): 0.0; S(5): 0.3; T(8): 97.7; S(11): 1.8; S(13): 0.3                                                  | 0.78 | -1.61 |
| Slc43a2 | Q8CGA3   | LCLSTVDLEVK                    | S(4): 50.0; T(5): 50.0                                                                                    | 0.77 | -0.78 |
| Map2    | P20357   | ETSPETSLIQDEVALK               | T(2): 99.7; S(3): 0.2; T(6): 0.0; S(7): 0.0                                                               | 0.76 | -0.66 |
| Synj1   | E9Q7S0   | TPGPPSSQGSVPDTQPAQAK           | T(1): 2.3; S(6): 2.3; S(7): 13.3; S(10): 82.0; T(14): 0.1                                                 | 0.76 | -0.72 |
| Ube4b   | Q9ES00   | LAGGQTSQPTTPLTSPQR             | T(6): 0.0; S(7): 0.0; T(10): 0.0; T(11): 0.0; T(14): 50.0; S(15): 50.0                                    | 0.75 | -0.03 |
| Arid1a  | E9QAQ7   | SHHAPMSPGSSGGGQPLAR            | S(1): 0.0; S(7): 100.0; S(10): 0.0; S(11): 0.0                                                            | 0.74 | -0.76 |
| Gm996   | A2AJA9   | SLEQLDELITDLVIDSR              | S(1): 100.0; T(10): 0.0; S(16): 0.0                                                                       | 0.74 | -0.08 |
| Stxbp1  | O08599-2 | ESSRVSFEDQAPTME                | S(2): 0.0; S(3): 0.0; S(6): 99.9; T(13): 0.0                                                              | 0.73 | -0.53 |
| Ccdc88a | Q5SNZ0-3 | SSSQENLLDEVMMK                 | S(1): 33.3; S(2): 33.3; S(3): 33.3                                                                        | 0.73 | -0.52 |
| Synj1   | E9Q7S0   | TPGPPSSQGSVPDTQPAQAK           | T(1): 0.0; S(6): 0.1; S(7): 0.0; S(10): 99.9; T(14): 0.0                                                  | 0.71 | -0.56 |
| Sorbs1  | Q62417   | SAQDLSDVSTDEVGIPLRNTERSK       | S(1): 0.0; S(6): 0.0; S(9): 0.0; T(10): 0.0; T(20): 1.8; S(23): 98.2                                      | 0.70 | -0.69 |
| Ccdc88a | Q5SNZ0-3 | DTTSFEDISQGISDDSSSTGSR         | T(2): 0.2; T(3): 6.6; S(4): 46.1; S(9): 46.1; S(14): 1.0; S(17): 0.0; S(18): 0.0; T(19): 0.0; S(21): 0.0  | 0.70 | -1.52 |
| Lgalsl  | Q8VED9   | LDDGHLNNSLGSPVQADVYFPR         | S(9): 0.0; S(12): 100.0; Y(19): 0.0                                                                       | 0.70 | -0.52 |
| Eif4b   | Q8BGD9   | ARPTTDSFDDYPPR                 | T(4): 0.0; T(5): 0.0; S(7): 100.0; Y(11): 0.0                                                             | 0.70 | -0.71 |
| Strip1  | Q8C079-3 | AASPPASADLIEQQQK               | S(3): 95.0; S(7): 5.0; S(9): 0.0                                                                          | 0.69 | -0.64 |
| Arhgap5 | E9PYT0   | GGIDNPAITSDQEVDDK              | T(9): 7.6; S(10): 92.4                                                                                    | 0.69 | -0.63 |
| Eif4b   | Q8BGD9   | SPPYTAFLGNLPYDVTEDSIK          | S(1): 33.3; Y(4): 33.3; T(5): 33.3; Y(13): 0.0; T(16): 0.0; S(19): 0.0                                    | 0.68 | -0.50 |
| Nos1ap  | Q9D3A8   | IFSYIARDGASNIFR                | S(3): 50.0; Y(4): 50.0; S(11): 0.0                                                                        | 0.67 | -0.30 |
| Camsap2 | Q8C1B1   | SESVGFSLSPSR                   | S(1): 0.0; S(3): 0.0; S(9): 99.7; S(11): 0.3                                                              | 0.67 | -0.39 |
| Gm21985 | Q6P6P5   | IDDIPGLSDTSPDLSSR              | S(8): 6.2; T(10): 87.6; S(11): 6.2; S(15): 0.0; S(16): 0.0                                                | 0.66 | -0.64 |
| Sfr1    | Q8BP27-2 | ENPPSPHSNSSGK                  | S(5): 100.0; S(8): 0.0; S(10): 0.0; S(11): 0.0                                                            | 0.66 | -0.34 |
| Pclo    | Q9QYX7   | KDSFSQESSPSSDLAK               | S(3): 0.0; S(5): 0.0; S(8): 0.0; S(9): 0.0; S(11): 48.1; S(12): 48.1; S(14): 3.8                          | 0.65 | -0.42 |
| Cep170  | H7BX26   | QGSFTIDKPSSNIPIELIPHINK        | S(3): 50.0; T(5): 50.0; S(10): 0.0; S(11): 0.0                                                            | 0.65 | -0.82 |
| Cpeb3   | D3Z1R6   | SSLFPFEDAFLDDSHGDQALSSGLSSPTR  | S(1): 0.0; S(2): 0.0; S(14): 0.0; S(21): 0.0; S(22): 0.0; S(25): 10.0; S(26): 80.0; T(28): 10.0           | 0.65 | -0.42 |
| Ptprz1  | B9EKR1   | EVSADVSEENFLTDFK               | S(3): 0.0; S(7): 100.0; T(14): 0.0                                                                        | 0.65 | -0.66 |
| Cyp17a1 | P27786   | MNAENNTGEGQDPSVFSK             | T(8): 0.0; S(15): 10.1; S(18): 89.9                                                                       | 0.65 | -1.15 |
| Sltm    | Q8CH25-2 | DVQDAIAQSPEK                   | S(9): 100.0                                                                                               | 0.64 | -0.45 |
| Cstf2t  | Q8C7E9   | QGGGQPSFSPGQSQVTPQDQEK         | S(7): 0.0; S(8): 0.0; S(10): 99.9; S(14): 0.0; T(17): 0.0                                                 | 0.64 | -0.46 |
| Epn2    | Q8CHU3   | AGGSPASYHGSTSPR                | S(4): 100.0; S(7): 0.0; Y(8): 0.0; S(11): 0.0; T(12): 0.0; S(13): 0.0                                     | 0.64 | 0.21  |
| Plcl1   | Q3USB7   | KLPSESDLLEGEVTEDEEAEMSR        | S(4): 0.0; S(6): 0.0; T(14): 100.0; S(23): 0.0                                                            | 0.64 | 0.04  |
| Dcps    | Q9DAR7   | EAGVGNGTAPVR                   | T(8): 50.0; S(9): 50.0                                                                                    | 0.64 | -0.27 |
| Kif2a   | P28740-1 | ARPSQLPEQSSAQQNGSVSDISPVQAAK   | S(4): 0.0; S(10): 0.0; S(11): 0.0; S(12): 0.0; S(18): 0.0; S(20): 0.0; S(23): 100.0                       | 0.63 | 0.01  |
| Chmp7   | Q8R1T1   | VSPVNDVDVGVYQLMQSEQLLSR        | S(2): 100.0; Y(12): 0.0; S(17): 0.0; S(22): 0.0                                                           | 0.62 | -0.72 |
| Tnr     | Q8BYI9   | ITFTPSSGISSEVTVPR              | T(2): 0.0; T(4): 1.0; S(6): 48.8; S(7): 48.8; S(10): 0.2; S(11): 1.0; T(14): 0.2                          | 0.62 | -0.92 |
| Dhx9    | O70133   | AEENNSGVESGYSVPPTWDR           | S(6): 0.0; S(10): 0.0; S(11): 0.0; Y(13): 0.0; S(15): 99.9; T(19): 0.0                                    | 0.62 | -0.72 |
| Zdhhc5  | Q8VDZ4   | SIGSASPGGQPPLSSPTR             | S(1): 0.0; S(4): 0.0; S(6): 0.0; S(15): 7.6; S(16): 84.9; T(18): 7.6                                      | 0.62 | -0.52 |
| Gclm    | O09172   | TLNEWSSQISPDVLR                | T(1): 0.0; S(6): 0.0; S(7): 0.0; S(10): 100.0                                                             | 0.61 | -0.27 |
| Pacsin1 | Q61644   | ALYDYDGGQEDELFSK               | Y(3): 0.0; Y(5): 0.0; S(14): 100.0                                                                        | 0.61 | -0.36 |
| Dock4   | P59764   | NSAPASMPDGTR                   | S(2): 0.0; S(6): 8.8; S(8): 91.2; T(12): 0.0                                                              | 0.60 | -0.59 |

|          |          |                                 |                                                                                                                      |      |       |
|----------|----------|---------------------------------|----------------------------------------------------------------------------------------------------------------------|------|-------|
| Ralgapa1 | Q6GYP7   | SATTTGSPGTEK                    | S(1): 0.0; T(3): 0.0; T(4): 0.0; T(5): 0.6; S(7): 99.3; T(10): 0.1                                                   | 0.59 | -0.63 |
| Top2b    | Q64511   | KAGSENEGDPYNGR                  | S(3): 50.0; S(5): 50.0; Y(11): 0.0                                                                                   | 0.59 | 0.19  |
| Fam117b  | Q3U3E2   | TSPTVATQTGASVTSTR               | T(1): 50.0; S(2): 50.0; T(4): 0.0; T(7): 0.0; T(9): 0.0; S(12): 0.0; T(14): 0.0; S(15): 0.0; T(16): 0.0              | 0.59 | 0.00  |
| BC051076 | Q80XE3   | NLLSLAEEIFNASMR                 | S(4): 99.9; S(13): 0.1                                                                                               | 0.58 | -0.92 |
| Scn11a   | Q9R053   | QRALSAVSLITITMQEKEK             | S(5): 50.0; S(8): 50.0; T(11): 0.0; T(13): 0.0                                                                       | 0.58 | -0.39 |
| Barx1    | Q9ER42   | NSIPTSEQLTEQER                  | S(2): 43.4; T(5): 6.6; S(6): 43.4; T(10): 6.6                                                                        | 0.58 | -0.37 |
| Zc3hc1   | H3BKM2   | SQDATVSPGSEQSEKSPGPIVSR         | S(1): 0.0; T(5): 0.0; S(7): 0.0; S(10): 0.0; S(13): 0.5; S(16): 99.5; S(22): 0.0                                     | 0.58 | -0.14 |
| Myo9b    | Q9QY06   | AQDKPESPSGSTQIQR                | S(7): 100.0; S(9): 0.0; S(11): 0.0; T(12): 0.0                                                                       | 0.58 | -0.43 |
| Park2    | Q9WVS6   | SHETNASGGDEPQSTSEGSIWESR        | S(1): 10.2; T(4): 89.6; S(7): 0.2; S(14): 0.0; T(15): 0.0; S(16): 0.0; S(19): 0.0; S(23): 0.0                        | 0.58 | -0.30 |
| Efh2     | Q8C845   | ADLNQGGIGEPQSPSRR               | S(12): 98.8; S(14): 1.2                                                                                              | 0.58 | -0.51 |
| Gpsm1    | Q6IR34-3 | AAQSSVTASPQTEEFFDLIASSQSR       | S(4): 0.0; S(5): 0.0; T(7): 8.5; S(9): 83.0; T(12): 8.5; S(21): 0.0; S(22): 0.0; S(24): 0.0                          | 0.57 | -0.17 |
| Lcp1     | Q61233   | GSVDEEMMELR                     | S(2): 100.0; S(4): 0.0                                                                                               | 0.57 | 0.10  |
| Sgip1    | Q8VD37   | YNSPELDEEGYSIRPEEPGSTK          | Y(1): 0.0; S(3): 0.0; Y(11): 0.0; S(12): 0.0; S(20): 89.2; T(21): 10.8                                               | 0.57 | -0.43 |
| Fam117b  | Q3U3E2   | TSPTVATQTGASVTSTR               | T(1): 50.0; S(2): 50.0; T(4): 0.0; T(7): 0.0; T(9): 0.0; S(12): 0.0; T(14): 0.0; S(15): 0.0; T(16): 0.0              | 0.56 | -0.09 |
| Sacs     | Q9JLC8-3 | EVMNTFWPGR                      | T(5): 100.0                                                                                                          | 0.56 | -0.06 |
| Il16     | Q54824   | DPGLPESPPPQRPSTK                | S(7): 100.0; S(15): 0.0; T(16): 0.0                                                                                  | 0.55 | -0.15 |
| Ctnna2   | Q61301-2 | HISPVQALSEFK                    | S(3): 100.0; S(9): 0.0                                                                                               | 0.53 | -1.15 |
| Vmn2r100 | E9QA29   | LAIDAEYEILNLWNLPK               | Y(7): 100.0                                                                                                          | 0.53 | -0.71 |
| Coro1a   | Q89053   | RATPEPSGTSSDVTISR               | T(3): 99.8; S(7): 0.1; T(9): 0.0; S(11): 0.0; S(12): 0.0; T(14): 0.0; S(16): 0.0                                     | 0.53 | -0.03 |
| Atp13a1  | Q9EPE9   | RPRDSPVLSNSGPR                  | S(5): 100.0; S(9): 0.0; S(11): 0.0                                                                                   | 0.52 | 0.01  |
| Ctnnb1   | Q02248   | RTSMGGTQQQFVEGVR                | T(2): 50.0; S(3): 50.0; T(7): 0.0                                                                                    | 0.52 | -0.39 |
| Zfr2     | E9Q5M4   | SPDSDSVSPGQRPPSSQR              | S(1): 100.0; S(4): 0.0; S(6): 0.0; S(8): 0.0; S(17): 0.0; S(18): 0.0                                                 | 0.52 | -0.32 |
| Akap12   | Q9WTQ5   | QSQVTEEEAAAQTEGPSTPSSFPAQEEHR   | S(2): 0.0; T(5): 0.0; T(14): 0.0; S(18): 92.3; T(19): 7.7; S(21): 0.0; S(22): 0.0                                    | 0.52 | -1.14 |
| Lztr1    | E9PUQ1   | SFMPEDGQVNSIGEMVPSR             | S(1): 99.9; S(12): 0.1; S(19): 0.0                                                                                   | 0.52 | -0.28 |
| Oxct1    | Q9D0K2   | SARNFNLMCK                      | S(1): 100.0                                                                                                          | 0.51 | -0.45 |
| Gpr124   | J3QP6    | FLGYVDQIK                       | Y(4): 100.0                                                                                                          | 0.51 | -0.46 |
| Clns1a   | Q923F1   | LGEESKEPLSDEDEEDNDVEPISEFR      | S(5): 0.0; S(10): 100.0; S(24): 0.0                                                                                  | 0.50 | 0.29  |
| Spast    | Q9QYY8   | GIAVITGQGEQYER                  | T(7): 1.4; Y(13): 98.6                                                                                               | 0.50 | -0.52 |
| Sptbn1   | Q62261   | TLETPAAQMEGFLNR                 | T(1): 0.0; T(4): 100.0                                                                                               | 0.50 | -0.13 |
| Map1a    | Q9QYR6   | ELSSEPRTPPAQK                   | S(3): 0.0; S(4): 0.0; T(8): 100.0                                                                                    | 0.50 | 0.03  |
| Map1a    | Q9QYR6   | ELSSAVSPPNLHSDTPTFSYASLAGPTIPPR | S(3): 0.0; S(4): 0.0; S(7): 98.9; S(13): 0.5; T(15): 0.5; T(17): 0.0; S(19): 0.0; Y(20): 0.0; S(22): 0.0; T(27): 0.0 | 0.50 | -0.47 |
| Nufip2   | Q5F2E7   | GADNDGSGSESGYTTPK               | S(7): 92.0; S(9): 7.9; S(11): 0.1; Y(13): 0.1; T(14): 0.0; T(15): 0.0                                                | 0.50 | -0.32 |
| Map7d2   | A2AG50   | SNSLDDSTEDVQSMVSPVSK            | S(1): 0.0; S(3): 0.0; S(7): 0.0; T(8): 0.0; S(13): 0.0; S(17): 100.0; S(20): 0.0                                     | 0.50 | -0.40 |
| Prkcb    | P68404-2 | NIDQSEFEGFSFNSEFLKPEVK          | S(5): 0.0; S(11): 50.0; S(15): 50.0                                                                                  | 0.49 | -0.53 |
| Syn1     | Q88935   | QSRPVAGGPGAPPAARPPASPSQR        | S(2): 0.0; S(20): 1.2; S(22): 98.8                                                                                   | 0.49 | -0.31 |
| Serinc1  | Q9QZ18   | LTLTDESTLIEDGNGR                | T(2): 0.0; T(4): 92.4; S(5): 7.0; S(8): 0.6; T(9): 0.0                                                               | 0.49 | -0.42 |
| Myo5a    | D3YZ62   | IGELEVGMENISPGQIIDEPIRVNIPR     | S(13): 100.0                                                                                                         | 0.49 | -1.08 |
| Syn1     | Q88935   | SQSLTNAFNLPEPAPPRPSLSQDEVK      | S(1): 0.0; S(3): 0.0; T(5): 0.0; S(19): 50.0; S(21): 50.0                                                            | 0.48 | -0.27 |
| Ndr4     | Q8BTG7-3 | RLSGGAVPSASMTTR                 | S(3): 0.9; S(9): 90.2; S(11): 8.8; T(13): 0.1                                                                        | 0.48 | -0.21 |
| Abcf1    | Q6P542   | GGNVFEALIQDDSEEEEEENR           | S(13): 100.0                                                                                                         | 0.48 | -1.07 |
| Brsk1    | Q5RJ15   | SPVFSFSPEPGAGDEAR               | S(1): 100.0; S(5): 0.0; S(7): 0.0                                                                                    | 0.47 | -0.07 |

|                                          |          |                                     |                                                                                                                                     |      |       |
|------------------------------------------|----------|-------------------------------------|-------------------------------------------------------------------------------------------------------------------------------------|------|-------|
| Rif1                                     | Q6PR54-2 | RASQGLISAVENSESDSSEAK               | S(3): 97.3; S(8): 2.7; S(13): 0.0; S(15): 0.0; S(17): 0.0; S(18): 0.0                                                               | 0,47 | -0,32 |
| Fam103a1                                 | Q9CQY2   | RPPEPPIVEEWNRSR                     | S(5): 100.0; S(14): 0.0                                                                                                             | 0,47 | -0,37 |
| Uncharacterized protein C17orf59 homolog | Q9D6W8   | RGSPGGVEMNVELPQQEGDDDDDEDEEAAAGR    | S(3): 100.0                                                                                                                         | 0,47 | 0,18  |
| Srgap1                                   | Q91Z69   | RPGHGSLTNISR                        | S(6): 100.0; T(8): 0.0; S(11): 0.0                                                                                                  | 0,47 | -0,56 |
| Hhip                                     | Q7TN16   | GPASNYLGQMEDYEK                     | S(4): 88.0; Y(6): 12.0; Y(13): 0.0                                                                                                  | 0,47 | -0,36 |
| Kif2a                                    | P28740-1 | EFGISPSDIPFSGGGSRPDLSPSYDYDDFSPSITR | S(5): 0.3; S(7): 0.3; S(12): 32.9; S(17): 32.9; S(22): 32.9; S(24): 0.3; Y(25): 0.3; Y(27): 0.0; S(31): 0.0; S(33): 0.0; T(35): 0.0 | 0,47 | -0,09 |
| Tanc1                                    | E9QAF9   | RADNCSPVAEEETTGAESVLPK              | S(6): 100.0; T(13): 0.0; T(14): 0.0; S(16): 0.0; S(19): 0.0                                                                         | 0,46 | -0,28 |
| Dpysl3                                   | E9PWE8   | GMYDGPVFDLTTTPK                     | Y(3): 0.0; T(11): 0.4; T(12): 6.0; T(13): 93.6                                                                                      | 0,46 | -0,09 |
| Ptchd3                                   | Q0EEE2   | GFIQIVDVSSSNK                       | S(9): 25.0; S(10): 25.0; S(11): 25.0; S(12): 25.0                                                                                   | 0,45 | -0,75 |
| Znf687                                   | Q9D2D7   | SDPEGGDSPLPAPGDPLTCK                | S(1): 0.0; S(8): 100.0; T(18): 0.0                                                                                                  | 0,45 | -0,27 |
| Bcan                                     | Q61361   | EVGGETGSPELSGVPR                    | T(6): 8.4; S(8): 91.6; S(12): 0.0                                                                                                   | 0,45 | 0,06  |
| Tmem100                                  | Q9CQG9   | RRESQTALVVNQR                       | S(4): 100.0; T(6): 0.0                                                                                                              | 0,45 | -0,36 |
| Epn1                                     | Q80VP1   | SPGAFDMSGVGGSLAESVGSPPAATPTPTPPTR   | S(1): 0.0; S(8): 0.2; S(13): 4.0; S(17): 4.0; S(20): 91.5; T(26): 0.2; T(28): 0.0; T(30): 0.0; T(33): 0.0                           | 0,45 | -0,03 |
| Alad                                     | P10518   | DAAQSSPAFGDR                        | S(5): 50.0; S(6): 50.0                                                                                                              | 0,44 | -0,07 |
| Lrrfp2                                   | E9QN52   | RSGSDTSSLIDPDTLSSELR                | S(3): 99.5; T(6): 0.4; S(7): 0.0; S(8): 0.0; T(14): 0.0; S(15): 0.0; S(17): 0.0                                                     | 0,43 | 0,09  |
| Dyrk1a                                   | A1L341   | IYQYIQSR                            | Y(2): 0.0; Y(4): 100.0; S(7): 0.0                                                                                                   | 0,43 | -0,07 |
| Mtss1l                                   | F7D291   | GGGAPWPGGAQTYSPSSTCR                | T(12): 1.0; Y(13): 1.0; S(14): 88.8; S(16): 9.0; S(17): 0.1; T(18): 0.1                                                             | 0,43 | -0,52 |
| Dsg2                                     | O55111   | LDLSIIVTNK                          | S(4): 100.0; T(8): 0.0                                                                                                              | 0,43 | 0,07  |
| Plxb3                                    | Q9QY40   | QEQQIILSVPR                         | S(9): 100.0                                                                                                                         | 0,43 | -0,17 |
| Irf2bp2                                  | E9Q1P8   | NSSPSPSSMNQR                        | S(2): 0.0; S(3): 50.0; S(4): 50.0; S(7): 0.0; S(9): 0.0; S(10): 0.0                                                                 | 0,43 | 0,10  |
| Akap12                                   | Q9WTQ5   | QAQSSTEIPLQAESGGTEEEAAKDGEEENR      | S(4): 33.3; S(5): 33.3; T(6): 33.3; S(14): 0.0; T(18): 0.0                                                                          | 0,43 | -0,04 |
| Dcl1                                     | Q9JLM8   | SKSPASTSSVNGTPGSQLSTPR              | S(1): 49.2; S(3): 49.2; S(6): 0.5; T(7): 0.5; S(8): 0.5; S(9): 0.0; T(13): 0.0; S(16): 0.0; S(19): 0.0; T(20): 0.0                  | 0,43 | 0,25  |
| 2010300C02Rik                            | E9Q3M9   | DMSPPEGDVAPPK                       | S(3): 100.0                                                                                                                         | 0,43 | -0,15 |
| Reps1                                    | D3Z2E3   | RQSSSYEDPWK                         | S(3): 99.4; S(4): 0.2; S(5): 0.2; Y(6): 0.2                                                                                         | 0,41 | -0,11 |
| Tppp                                     | Q7TQD2   | RLSLESEGANEGATAAPELSALEEAFR         | S(3): 93.2; S(6): 6.8; T(14): 0.0; S(20): 0.0                                                                                       | 0,41 | 0,11  |
| Atp1a3                                   | Q6PIC6   | CIELSSGSVK                          | S(5): 0.2; S(6): 49.9; S(8): 49.9                                                                                                   | 0,41 | -0,26 |
| Map2                                     | P20357   | LASVSADAEVAR                        | S(3): 94.4; S(5): 5.6                                                                                                               | 0,41 | -0,22 |
| Coil                                     | Q5SU73   | LMEDEETDQGYK                        | T(7): 100.0; Y(11): 0.0                                                                                                             | 0,41 | -0,24 |
| Map1a                                    | Q9QYR6   | VAELEEESQSGSSSYSDWVK                | S(9): 100.0; S(12): 0.0; S(13): 0.0; S(14): 0.0; Y(15): 0.0; S(16): 0.0                                                             | 0,41 | -0,66 |
| lyd                                      | Q9DCX8   | AAGTAPSGAHTPEWTFVVVK                | T(4): 0.0; S(7): 0.7; T(11): 3.3; T(15): 95.9                                                                                       | 0,41 | -0,32 |
| Camkk2                                   | Q8C078   | KMSLQEPSQGGPASSNSLDMNGR             | S(3): 100.0; S(8): 0.0; S(14): 0.0; S(15): 0.0; S(16): 0.0; S(18): 0.0                                                              | 0,41 | -0,55 |
| Plcl1                                    | Q3USB7   | KLPSESDLLEGEVTDEEEAEMSR             | S(4): 0.0; S(6): 0.0; T(14): 100.0; S(23): 0.0                                                                                      | 0,41 | -0,23 |
| Bad                                      | F7ABX5   | RMSDEFEGSFK                         | S(3): 100.0; S(9): 0.0                                                                                                              | 0,41 | 0,16  |
| Rem2                                     | Q8VEL9-2 | GHAGGQRPEPSSPDGPAPPTR               | S(11): 50.0; S(12): 50.0; T(20): 0.0                                                                                                | 0,40 | 0,08  |
| Stim2                                    | P83093   | GSPECVGLTETK                        | S(2): 100.0; T(9): 0.0; T(11): 0.0                                                                                                  | 0,40 | -0,14 |
| Map1a                                    | Q9QYR6   | QLSPELGLTLQFGELSLGK                 | S(3): 100.0; S(6): 0.0; T(9): 0.0; S(16): 0.0                                                                                       | 0,40 | -0,20 |
| Usp8                                     | Q80U87   | SYSSPDITQALQEEEK                    | S(1): 0.3; Y(2): 0.3; S(3): 4.8; S(4): 89.8; T(8): 4.8                                                                              | 0,40 | -0,10 |
| Ryr2                                     | E9Q401   | RISQTSQVSIIDAAHGYSR                 | S(3): 100.0; T(5): 0.0; S(6): 0.0; S(9): 0.0; Y(16): 0.0; S(17): 0.0                                                                | 0,40 | -0,29 |
| Chmp6                                    | B1AZ42   | MHQVMSIEEVER                        | S(6): 100.0                                                                                                                         | 0,40 | -0,05 |
| Arhgef12                                 | Q8R4H2   | SEGVQDAEPQSLVGPSTR                  | S(1): 0.0; S(11): 0.0; S(15): 83.9; S(17): 8.0; T(18): 8.0                                                                          | 0,40 | -0,16 |
| Map4k4                                   | E9PVG7   | RDSPLQGGGQNSQAGQR                   | S(3): 100.0; S(13): 0.0                                                                                                             | 0,40 | -0,26 |
| Map3k7                                   | Q62073   | SIQDLTVTGTPEPGQVSSR                 | S(1): 100.0; T(6): 0.0; T(8): 0.0; T(10): 0.0; S(16): 0.0; S(17): 0.0                                                               | 0,40 | -0,21 |

|               |          |                               |                                                                                                                                                                       |       |       |
|---------------|----------|-------------------------------|-----------------------------------------------------------------------------------------------------------------------------------------------------------------------|-------|-------|
| Arhgef18      | Q6P9R4-2 | RAETFGGYDSVGSPSK              | T(4): 0.0; Y(8): 0.0; S(10): 0.0; S(13): 100.0; S(15): 0.0                                                                                                            | 0,39  | -0,28 |
| Tspyl4        | Q8VD63   | EMEAAAGEAGADGGASPDSEHCGPELCFR | S(15): 99.5; S(18): 0.5                                                                                                                                               | 0,39  | -0,42 |
| Akap12        | Q9WTQ5   | SATLSSTESTASGMQDEV            | S(1): 0.0; T(3): 0.0; S(5): 0.0; S(6): 0.0; T(7): 0.0; S(9): 0.0; T(10): 0.0; S(12): 100.0                                                                            | 0,39  | -0,09 |
| Orai3         | D3Z6X8   | GGEGDTGEQAPLNPEVDSVSPAGSATYR  | T(6): 0.0; S(18): 85.1; S(22): 2.0; T(24): 0.3; Y(25): 12.6                                                                                                           | 0,39  | 0,30  |
| Map7          | D3YWN7   | LSSSSATLLNSPDR                | S(2): 0.0; S(3): 0.0; S(4): 0.0; S(5): 0.0; T(7): 1.2; S(11): 98.8                                                                                                    | 0,39  | -0,35 |
| Park2         | Q9WVS6   | SHETNASGGDEPQSTSEGSIWESR      | S(1): 1.6; T(4): 96.8; S(7): 1.6; S(14): 0.0; T(15): 0.0; S(16): 0.0; S(19): 0.0; S(23): 0.0                                                                          | 0,39  | -0,30 |
| Lnp           | Q7TQ95   | ADSVPNLEPSEESLVTK             | S(3): 100.0; S(10): 0.0; S(13): 0.0; T(16): 0.0                                                                                                                       | 0,38  | -0,39 |
| Sp4           | K4DI62   | ENNVSQPASSSSSSSSNNGSSSPTK     | S(5): 0.0; S(9): 0.0; S(10): 0.0; S(11): 0.0; S(12): 0.0; S(13): 0.0; S(14): 0.0; S(15): 0.0; S(16): 0.0; S(17): 0.0; S(21): 0.4; S(22): 6.1; S(23): 87.3; T(25): 6.1 | 0,38  | -0,39 |
| Pclo          | Q9QYX7   | KDSFSQESSPSSDLAK              | S(3): 0.0; S(5): 0.0; S(8): 0.0; S(9): 0.0; S(11): 94.8; S(12): 5.2; S(14): 0.0                                                                                       | 0,38  | -0,25 |
| Pdha1         | P35486   | YHGHSMSDPGVSyr                | Y(1): 0.0; S(5): 100.0; S(7): 0.0; S(12): 0.0; Y(13): 0.0                                                                                                             | 0,38  | 0,25  |
| Rims2         | D9HP81   | TGSVQTSPSSPTGTGR              | T(1): 0.2; S(3): 33.0; T(6): 33.0; S(7): 33.0; S(9): 0.2; S(10): 0.2; T(11): 0.2; T(14): 0.0                                                                          | 0,38  | -0,34 |
| Xkr4          | Q5GH67   | TVVSSGSAAGEGVRPSTPQR          | T(1): 0.0; S(4): 0.0; S(5): 0.0; S(7): 0.0; S(17): 13.3; T(18): 86.6                                                                                                  | 0,37  | -0,33 |
| Lgalsl        | Q8VED9   | LDDGHLNNSLGSVPQADVYFPR        | S(9): 0.0; S(12): 100.0; Y(19): 0.0                                                                                                                                   | 0,37  | -0,32 |
| Chgb          | P16014   | ADEFDFYDSEEQMGPHQEANDEK       | Y(8): 0.7; S(10): 99.3                                                                                                                                                | 0,37  | -0,19 |
| Frmd6         | Q8C0V9-2 | HLSLDDIR                      | S(2): 0.0; S(4): 100.0                                                                                                                                                | 0,37  | -0,47 |
| Gulo          | P58710   | GDDILLSPCFQR                  | S(7): 100.0                                                                                                                                                           | 0,37  | -0,28 |
| Mcf2l         | E9PX2    | TSSTGEEEESLAILR               | T(1): 0.4; S(2): 99.3; S(3): 0.4; T(4): 0.0; S(10): 0.0                                                                                                               | 0,36  | -0,18 |
| Acta1         | P68134   | DLYANNVMSGGTTMYPIADR          | Y(3): 0.0; S(9): 100.0; T(12): 0.0; T(13): 0.0; Y(15): 0.0                                                                                                            | 0,36  | 0,14  |
| 6430548M08Rik | Q3TA40   | TVTMIPEDEQK                   | T(1): 0.0; T(3): 0.0; S(6): 100.0                                                                                                                                     | 0,36  | -0,38 |
| Fez1          | Q8K0X8   | SMEDLVNEFDEK                  | S(1): 100.0                                                                                                                                                           | 0,36  | -0,07 |
| Lppr3         | Q7TPB0   | QPGMGPGSPVSDVDQEEPR           | S(8): 100.0; S(11): 0.0                                                                                                                                               | 0,36  | -0,89 |
| Sptbn4        | E9PX29   | QESADHEGPHSLTLGR              | S(3): 100.0; S(11): 0.0; T(13): 0.0                                                                                                                                   | 0,36  | -0,18 |
| Gsk3b         | Q9WV60   | IQAAASPANATAASDTNAGDR         | S(6): 100.0; T(12): 0.0; S(15): 0.0; T(17): 0.0                                                                                                                       | 0,36  | 0,09  |
| Map3k7        | Q62073   | SIQDLTVTGTEPGQVSSR            | S(1): 100.0; T(6): 0.0; T(8): 0.0; T(10): 0.0; S(16): 0.0; S(17): 0.0                                                                                                 | 0,36  | -0,15 |
| Pi4ka         | E9Q3L2   | TSSVSSISQVSPER                | T(1): 0.0; S(2): 0.0; S(3): 0.0; S(5): 0.0; S(6): 0.0; S(8): 0.0; S(11): 100.0                                                                                        | 0,36  | -0,47 |
| Rufy3         | Q9D394   | ELDDISLTPDPEPTHEDPNYLMANER    | S(6): 0.8; T(8): 99.2; T(14): 0.0; Y(20): 0.0                                                                                                                         | 0,36  | -0,21 |
| Oxr1          | Q4KMM3   | ESLPIELDQLSGR                 | S(2): 0.0; S(11): 100.0                                                                                                                                               | 0,36  | -0,23 |
| Rph3a         | P47708   | WHQLQENHNVSSD                 | S(11): 50.0; S(12): 50.0                                                                                                                                              | 0,36  | -0,25 |
| Akt2          | Q60823   | YFDFEFTAQSITITPPDR            | Y(1): 0.0; T(7): 0.0; S(10): 0.0; T(12): 0.1; T(14): 99.9                                                                                                             | -0,37 | 0,14  |
| Slc1a2        | P43006-2 | ESNSNQCVYAAHNSVVIDECK         | S(2): 50.0; S(4): 50.0; Y(9): 0.0; S(14): 0.0                                                                                                                         | -0,37 | 0,22  |
| ErbB4         | Q61527-3 | ILNETTGPK                     | T(5): 50.0; T(6): 50.0                                                                                                                                                | -0,37 | 0,07  |
| Cask          | O70589-3 | TQSSCEDLPSTTPK                | T(1): 0.7; S(3): 5.5; S(4): 46.9; S(5): 46.9; S(11): 0.0; T(12): 0.0; T(13): 0.0                                                                                      | -0,37 | 0,17  |
| Slc12a5       | Q91V14   | ESSPFINSTDEK                  | S(2): 7.1; S(3): 92.9; S(8): 0.0; T(9): 0.0; T(11): 0.0                                                                                                               | -0,37 | 0,18  |
| Leo1          | Q5XJE5   | KLNSDEEGESSGK                 | S(4): 100.0; S(10): 0.0; S(11): 0.0                                                                                                                                   | -0,37 | 0,38  |
| Ctnna1        | P26231   | TPEELDDSDFFETEDFDVR           | T(1): 0.0; S(8): 100.0; T(12): 0.0                                                                                                                                    | -0,37 | 0,11  |
| Kcnt1         | Q6ZPR4   | SDPLAHVASSQSQR                | S(1): 0.0; S(9): 49.9; S(10): 49.9; S(11): 0.1; S(13): 0.0                                                                                                            | -0,37 | 0,00  |
| Dmtn          | Q9WV69   | LQSTEFSPSGSEAGSPGLQNGEGQR     | S(3): 46.9; T(4): 46.9; S(7): 6.1; S(9): 0.1; S(11): 0.0; S(15): 0.0                                                                                                  | -0,37 | -0,12 |
| Ywhaz         | P63101   | TAFDEAIAELDTLSEESYKDSLIMQLLR  | T(1): 0.0; T(12): 49.9; S(14): 49.9; S(17): 0.1; Y(18): 0.1; S(21): 0.0; T(22): 0.0                                                                                   | -0,37 | 0,85  |
| Adcyap1r1     | E9Q3E8   | HPSLASSGVNGGTQLSILSK          | S(3): 100.0; S(6): 0.0; S(7): 0.0; T(13): 0.0; S(16): 0.0; S(19): 0.0                                                                                                 | -0,37 | 0,09  |



|                                        |          |                                    |                                                                                                           |       |       |
|----------------------------------------|----------|------------------------------------|-----------------------------------------------------------------------------------------------------------|-------|-------|
| Gprin1                                 | Q3UNH4   | AETVSPGEVDAMTLGK                   | T(3): 0.3; S(5): 99.7; T(13): 0.0                                                                         | -0.37 | 0.41  |
| Slc4a4                                 | E9Q8N8   | MFSNPDNGSPAMTHR                    | S(3): 0.0; S(9): 99.8; T(13): 0.2                                                                         | -0.37 | 0.13  |
| Amph                                   | Q7TQF7   | AFSIQGAPSDSGPLR                    | S(3): 0.0; S(9): 7.2; S(11): 92.8                                                                         | -0.37 | 0.45  |
| Dbi                                    | Q4VWZ5   | TQPTDEEMLFYSHFK                    | T(1): 0.0; T(4): 0.0; Y(12): 95.8; S(13): 4.2                                                             | -0.38 | 0.33  |
| Npm1                                   | Q61937   | CGSGPVHISGQHLVAVEEDAEEDEEDVVK      | S(3): 0.0; S(9): 0.0; S(22): 100.0                                                                        | -0.38 | 0.24  |
| Slc12a5                                | Q91V14   | GPSVPSSEGIK                        | S(3): 100.0; S(6): 0.0; S(7): 0.0                                                                         | -0.38 | -0.19 |
| Kdm4d                                  | Q3U2K5   | QVSRSLPIATVSNVPCNMVQVCHTSR         | S(3): 0.0; S(5): 0.0; T(11): 0.0; S(13): 0.0; T(24): 13.4; S(25): 86.6                                    | -0.38 | 0.11  |
| Srrm2                                  | Q8BT18   | SGMSPEQSK                          | S(1): 0.0; S(4): 100.0; S(8): 0.0                                                                         | -0.38 | 0.29  |
| Arvcf                                  | P98203-2 | SLAADDEGGPDLEPDYSTATR              | S(1): 100.0; Y(16): 0.0; S(17): 0.0; T(18): 0.0; T(20): 0.0                                               | -0.38 | -0.34 |
| Nrg2                                   | P56974-2 | SDSPPLCPAASDR                      | S(1): 0.2; S(3): 99.8; S(12): 0.0                                                                         | -0.38 | 0.32  |
| Ppfia3                                 | B8QI35   | ESVSLAGTSPDETLDPLGLAK              | S(2): 0.0; S(4): 0.0; T(8): 0.6; S(10): 0.6; T(13): 98.7; T(16): 0.1                                      | -0.38 | 0.06  |
| Grid2ip                                | Q0QWG9-2 | SRASPPVPSLVGTSGPR                  | S(1): 0.5; S(4): 99.5; S(9): 0.0; T(13): 0.0; S(14): 0.0                                                  | -0.38 | -0.05 |
| Phkb                                   | Q7TSH2   | EGPNFITMEGTVSDHIER                 | T(7): 10.0; T(11): 10.0; S(13): 80.1                                                                      | -0.38 | -0.21 |
| Dagla                                  | Q6WQJ1   | LLSPVAAASAAR                       | S(3): 100.0; S(9): 0.0                                                                                    | -0.38 | 0.28  |
| Csnk1d                                 | Q9DC28   | GTQEVAPPTPLTPTSHTANTSPRPVSGMER     | T(2): 0.0; T(9): 0.0; T(12): 0.0; T(14): 0.0; S(15): 0.0; T(17): 0.0; T(20): 1.2; S(21): 1.2; S(26): 97.7 | -0.38 | -0.02 |
| Fry                                    | E9Q8I9   | KSTGQLNVNPGTPGGGGGGSGNTTAAER       | S(2): 88.1; T(3): 11.9; T(12): 0.0; S(15): 0.0; S(22): 0.0; T(25): 0.0; T(26): 0.0; T(27): 0.0            | -0.39 | -0.06 |
| Col6a5                                 | A6H584   | GITIFAVGVGNANQDELETMAGK            | T(3): 100.0; T(19): 0.0                                                                                   | -0.39 | 0.03  |
| Pak1                                   | G5E884   | DVATSPISPENTNTTPPDALTR             | T(4): 0.0; S(5): 0.4; S(8): 99.6; T(10): 0.0; T(14): 0.0; T(15): 0.0; T(21): 0.0                          | -0.39 | -0.07 |
| Preb                                   | D3Z3S1   | NLEAVQTDFNSNEPLQK                  | T(7): 0.4; S(10): 99.6                                                                                    | -0.39 | 0.27  |
| Ncam1                                  | P13595   | GVTASSSSPASAPK                     | T(3): 0.0; S(5): 0.0; S(6): 0.3; S(7): 5.5; S(8): 94.1; S(11): 0.0                                        | -0.39 | 0.07  |
| C2cd5                                  | Q7TPS5   | SQSESSDEVTELDLSHGK                 | S(1): 0.6; S(3): 98.9; S(5): 0.6; S(6): 0.0; T(10): 0.0; S(15): 0.0                                       | -0.39 | 0.22  |
| Pkp4                                   | Q68FH0   | VASPSQQQVGS SSPK                   | S(3): 0.0; S(5): 0.0; S(11): 0.0; S(12): 5.3; S(13): 94.7                                                 | -0.40 | -0.13 |
| Mpdz                                   | Q8VBX6-2 | NVQGLGITIAGYIGDK                   | T(8): 98.6; Y(12): 1.4                                                                                    | -0.40 | -0.13 |
| Vill                                   | D3Z669   | TVVSVFPGNNK                        | T(1): 93.3; S(4): 6.7                                                                                     | -0.40 | -0.13 |
| Whsc1l1                                | Q6P2L6-2 | SEKPAQSASSPEATSGSAGPVEK            | S(1): 6.0; S(7): 6.0; S(9): 6.0; S(10): 35.1; T(14): 35.1; S(15): 6.0; S(17): 6.0                         | -0.40 | -0.31 |
| Zdhhc13                                | D3YY07   | LLEAGSSLDIRNAK                     | S(6): 99.4; S(7): 0.6                                                                                     | -0.40 | -0.23 |
| Rps6kc1                                | Q8BLK9-2 | GVDLLLEGVQGESSPTR                  | S(13): 49.9; S(14): 49.9; T(16): 0.2                                                                      | -0.40 | 0.00  |
| Cadm4                                  | Q8R464   | QKGSYLTHEASGLDEQGEAR               | S(4): 0.0; Y(5): 0.0; T(7): 0.0; S(11): 100.0                                                             | -0.40 | 0.21  |
| Phf3                                   | B2RQG2   | NTVDIVDKPENSPQR                    | T(2): 0.0; S(12): 100.0                                                                                   | -0.40 | 0.05  |
| Rnmt                                   | Q9D0L8   | EFGEDLVEQNSSYVQDSPSK               | S(11): 0.0; S(12): 0.0; Y(13): 0.0; S(17): 92.5; S(19): 7.5                                               | -0.40 | 0.17  |
| Pkp4                                   | Q68FH0   | AEQYPGSPDSWV                       | Y(4): 0.0; S(7): 100.0; S(10): 0.0                                                                        | -0.40 | 0.42  |
| Zfp185                                 | A2BI37   | RSSISGTEEEVFPFTPDEQK               | S(2): 25.0; S(3): 25.0; S(5): 25.0; T(7): 25.0; T(15): 0.0                                                | -0.40 | -0.26 |
| Gja1                                   | P23242   | SDPYHATTGPLSPSK                    | S(1): 0.0; Y(4): 0.0; T(7): 0.0; T(8): 0.0; S(12): 99.4; S(14): 0.6                                       | -0.40 | -0.30 |
| Ppp3cb                                 | E0CZ78   | ICSFEEAK                           | S(3): 100.0                                                                                               | -0.40 | 0.33  |
| Pianp                                  | Q6P1B3   | QEESQQLTDLSPAGVTVLGAFGDSPTTPDHEEPR | S(4): 0.0; T(9): 0.0; S(12): 0.0; T(17): 0.0; S(25): 99.5; T(27): 0.3; T(29): 0.3                         | -0.41 | 0.85  |
| Slc4a4                                 | E9Q8N8   | MFSNPDNGSPAMTHR                    | S(3): 0.0; S(9): 95.2; T(13): 4.8                                                                         | -0.41 | -0.03 |
| Transmembrane protein C15orf27 homolog | Q8BZB3   | ALDPAPLAQPTPLGSGVQTSPELEHR         | T(11): 0.0; S(15): 0.0; T(18): 50.0; S(19): 50.0                                                          | -0.42 | -0.19 |
| Zc3h13                                 | E9Q784   | SLSPSHLTEDR                        | S(1): 99.7; S(3): 0.3; S(5): 0.0; T(8): 0.0                                                               | -0.42 | 0.24  |
| Xirp2                                  | Q4U4S6-2 | FETQPLDMISDK                       | T(3): 100.0; S(10): 0.0                                                                                   | -0.42 | 0.06  |
| Gtf3c1                                 | Q8K284-2 | VAASPRPGAEEQAEQAQAQAAPADAGGPR      | S(4): 100.0                                                                                               | -0.42 | -0.26 |
| Edc4                                   | G5E896   | DSQDTSAEQSDHDEVASLASASGGFGSK       | S(2): 0.0; T(5): 0.0; S(6): 0.0; S(10): 100.0; S(18): 0.0; S(21): 0.0; S(23): 0.0; S(28): 0.0             | -0.42 | 0.29  |

|          |          |                                             |                                                                                                     |       |       |
|----------|----------|---------------------------------------------|-----------------------------------------------------------------------------------------------------|-------|-------|
| Hcn2     | Q88703   | RAPPGLPPAASPGPAAAPSSPR                      | S(12): 0.0; S(19): 0.0; S(25): 50.0; S(26): 50.0                                                    | -0.42 | 0.25  |
| Gm2933   | Q1LZ15   | LMYVLALSSDLLVIQK                            | Y(3): 90.2; S(8): 9.7; S(9): 0.1                                                                    | -0.42 | 0.22  |
| Uty      | D6RFT4   | GSEVQSIIK                                   | S(2): 0.0; S(6): 100.0                                                                              | -0.42 | 0.06  |
| Trappc9  | Q3U0M1-3 | FNFESVPESPGEK                               | S(5): 0.0; S(9): 100.0                                                                              | -0.43 | 0.12  |
| Rtn4     | Q99P72   | ESAEFSVLEYSEMGSFNGSPK                       | S(2): 0.0; S(6): 0.0; Y(10): 0.0; S(11): 0.0; S(15): 0.1; S(16): 0.9; S(20): 99.0                   | -0.43 | 0.01  |
| Akt1     | P31750   | SGSPSDNSGAEEMEVLAKPK                        | S(1): 0.0; S(3): 99.0; S(5): 0.9; S(8): 0.0; S(16): 0.0                                             | -0.43 | 0.23  |
| Col18a1  | P39061-2 | DGEPGDPGEDGRPGDTGPQGFPGTPGDVGP              | T(16): 1.3; T(24): 98.7                                                                             | -0.43 | 0.05  |
| Sfswap   | Q3USH5   | VKLDDDEEEDSR                                | S(7): 100.0; S(13): 0.0                                                                             | -0.43 | -0.04 |
| Golga4   | Q91VW5   | TSSFTDQLDDVTPNR                             | T(1): 33.3; S(2): 33.3; S(3): 33.3; T(5): 0.0; T(12): 0.0                                           | -0.43 | 0.58  |
| Vdac1    | Q8K284-2 | VAASPRPGAEEQAEQAQAQLAAPEDADAGPR             | S(4): 100.0                                                                                         | -0.43 | 0.03  |
| Mettl21e | Q8CDZ2   | ELFDLEEISSFSLNIK                            | S(9): 33.3; S(10): 33.3; S(13): 33.3                                                                | -0.44 | -0.06 |
| Ahnak    | E9Q616   | GGVTGSPEASISGSK                             | T(4): 0.0; S(6): 0.0; S(10): 0.1; S(12): 0.1; S(14): 99.8                                           | -0.44 | 0.27  |
| Wdr20a   | Q3UWE6   | SNSLPHSAVSNAASK                             | S(1): 0.0; S(3): 100.0; S(7): 0.0; S(10): 0.0; S(14): 0.0                                           | -0.44 | 0.15  |
| Usp47    | Q8BY87-2 | STETSDFENIESPLNER                           | S(1): 0.0; T(2): 0.0; T(4): 0.0; S(5): 0.0; S(12): 100.0                                            | -0.44 | 0.25  |
| Hepacam  | Q640R3   | STTEPGPPGYSVPPVPR                           | S(1): 0.0; T(2): 0.0; T(3): 0.0; Y(10): 9.5; S(11): 81.0; S(13): 9.5                                | -0.44 | -0.36 |
| Iih2     | Q61703   | SLPEESGEETDTPVPTLYSYK                       | S(1): 1.1; S(6): 89.0; T(10): 9.8; T(12): 0.1; T(17): 0.0; Y(19): 0.0; S(20): 0.0; Y(21): 0.0       | -0.44 | 0.21  |
| Dock7    | E9PX48   | SLSNSNPDISGTPSPDDEV                         | S(1): 0.0; S(3): 0.1; S(5): 99.7; S(10): 0.1; T(12): 0.0; T(14): 0.0; S(15): 0.0                    | -0.44 | 0.12  |
| Vdac1    | Q60932-2 | LTFDSSFSPNTGK                               | T(2): 0.0; S(5): 0.5; S(6): 0.5; S(8): 98.5; T(11): 0.5                                             | -0.44 | 1.55  |
| Mobp     | Q9D2P8   | ATSPQRPK                                    | T(2): 50.0; S(3): 50.0                                                                              | -0.44 | 0.54  |
| Arpp21   | E9Q4A0   | AWSSTDSOSSNR                                | S(3): 6.6; S(4): 92.9; T(5): 0.5; S(7): 0.0; S(9): 0.0; S(10): 0.0                                  | -0.44 | -0.22 |
| Prdm13   | E9PZZ1-2 | YPESISYLSGPAAAAAAAAAAAAAAAAAAIGPAELGSLASIDR | Y(1): 0.1; S(4): 0.2; S(6): 0.2; Y(7): 0.3; S(9): 0.3; S(35): 49.5; S(38): 49.5                     | -0.45 | 0.34  |
| Maoa     | Q64133   | VLGSQEALSPVHYEEK                            | S(4): 0.0; S(9): 100.0; Y(13): 0.0                                                                  | -0.45 | 0.03  |
| Prkce    | P16054   | KLAAGAESPQASGNPSEDDR                        | S(8): 0.0; S(13): 5.5; S(16): 89.0; S(18): 5.5                                                      | -0.45 | 0.38  |
| Bcl2l13  | P59017   | TSPTPSVVELGEELEAVTARPEAVER                  | T(1): 97.6; S(2): 1.2; T(4): 1.2; S(6): 0.0; T(20): 0.0                                             | -0.45 | -0.40 |
| Kcnk1    | O08581   | QSEPFVASQSPPYEDGSADH                        | S(2): 0.0; S(8): 50.0; S(10): 50.0; Y(13): 0.0; S(17): 0.0                                          | -0.45 | -0.41 |
| Cdkn1b   | P46414   | TEENVSDGSPNAGTVEQTPK                        | T(1): 0.0; S(6): 0.0; S(9): 100.0; T(14): 0.0; T(18): 0.0                                           | -0.45 | 0.58  |
| Scn2a1   | B1AWN6   | AMSMASILTNTMEELEESR                         | S(3): 0.0; S(6): 0.0; T(9): 2.0; T(11): 12.5; S(18): 85.4                                           | -0.46 | 0.40  |
| Svop     | Q8BFT9   | TGESARSEDAAASGEHQIEGVR                      | T(1): 1.6; S(4): 49.2; S(7): 49.2; S(13): 0.1                                                       | -0.46 | -0.27 |
| Caskin2  | Q8VHK1   | VGLSPDSPAGDRNSVSGSESVGSIR                   | S(4): 99.0; S(7): 1.0; S(14): 0.0; S(17): 0.0; S(20): 0.0; S(23): 0.0                               | -0.46 | -0.10 |
| Phkb     | Q7TSH2   | SGSVYEPLK                                   | S(1): 5.8; S(3): 93.8; Y(5): 0.4                                                                    | -0.46 | -0.04 |
| Map1b    | P14873   | ASLSPMDEPVPDSESPVEK                         | S(2): 50.0; S(4): 50.0; S(13): 0.0; S(15): 0.0                                                      | -0.46 | 0.66  |
| Bclaf1   | Q99JP4   | QKEDVEGVGTSDEGGAAGLSSDPK                    | T(10): 8.1; S(11): 91.9; S(20): 0.0; S(21): 0.0                                                     | -0.46 | 0.76  |
| Tprg1l   | Q9DBS2   | DTVDSAGTSPTAVLAAGEDAGRPGAGTPLR              | T(2): 0.0; S(5): 0.0; T(8): 0.0; S(9): 0.0; T(11): 0.0; T(29): 100.0                                | -0.46 | -0.05 |
| Col3a1   | P08121   | GENGSPGAPGAPGHPGPPGVPVPSGK                  | S(5): 100.0; S(24): 0.0                                                                             | -0.46 | 0.08  |
| Vamp4    | O70480   | NLLEDDSEEEEDFFLR                            | S(7): 100.0                                                                                         | -0.47 | 0.11  |
| Nfix     | P70257-1 | SPAAGSSQSSGWPNDVDAGPASLK                    | S(1): 93.5; S(6): 2.7; S(7): 2.7; S(9): 0.5; S(10): 0.5; S(22): 0.0                                 | -0.47 | 0.10  |
| Bsn      | Q88737   | SADCSVQTDEEDNADWEQPV                        | S(1): 0.0; S(5): 0.0; T(8): 100.0                                                                   | -0.47 | 0.59  |
| Kndc1    | Q0KK55   | VVNGPASPSESTSEEPGSQPEHSPSR                  | S(7): 0.0; S(9): 0.0; S(11): 0.0; T(12): 0.0; S(13): 0.0; S(18): 0.1; S(23): 50.0; S(25): 50.0      | -0.47 | -0.38 |
| Prpf40b  | D3Z4N6   | TGWDTSESELSEGLER                            | T(1): 0.0; T(5): 0.0; S(6): 0.0; S(8): 0.0; S(11): 100.0                                            | -0.47 | -0.37 |
| Lmnb2    | P21619   | ATSSSSSSSGVMSVQGR                           | T(2): 9.0; S(3): 79.6; S(4): 9.0; S(5): 1.1; S(6): 1.1; S(7): 0.1; S(8): 0.0; S(9): 0.1; S(14): 0.0 | -0.47 | -0.03 |
| Map1a    | Q9QYR6   | WLAESPVGLPPEEEDK                            | S(5): 100.0                                                                                         | -0.47 | 0.11  |
| Pfas     | Q5SUR0   | TGQGDAPLTPPTPVDLDDWVLGK                     | T(1): 0.0; T(9): 87.2; T(12): 12.8                                                                  | -0.47 | 0.66  |

|          |          |                                              |                                                                                                                                                             |       |       |
|----------|----------|----------------------------------------------|-------------------------------------------------------------------------------------------------------------------------------------------------------------|-------|-------|
| Gramd1b  | Q80TI0   | SRSPTPQNQDGDITMVEK                           | S(1): 1.5; S(3): 96.9; T(5): 1.5; T(13): 0.0                                                                                                                | -0.48 | -0.41 |
| Taf3     | A2ASY0   | GDSLDDVLLLEAR                                | S(3): 100.0                                                                                                                                                 | -0.48 | 0.49  |
| F2       | H7BX99   | TTDAEFHTFFNEK                                | T(1): 0.2; T(2): 1.5; T(8): 98.3                                                                                                                            | -0.48 | -0.23 |
| Rapgef2  | E9QNQ4   | SLGSLSQGSANATVLDVAQTGGHK                     | S(1): 97.9; S(4): 2.0; S(6): 0.1; S(9): 0.1; T(13): 0.0; T(20): 0.0                                                                                         | -0.48 | -0.08 |
| Gap43    | P06837   | KEGDGSATTDAAPATSPK                           | S(6): 0.0; T(8): 0.0; T(9): 0.0; T(15): 50.0; S(16): 50.0                                                                                                   | -0.48 | -0.36 |
| Nav1     | Q8CH77-2 | SASSYSIDIEIATPDSSAPSSPK                      | S(1): 0.0; S(3): 0.0; S(4): 0.0; Y(5): 0.0; S(6): 0.0; T(13): 0.0; S(16): 0.0; S(17): 0.0; S(20): 50.0; S(21): 50.0                                         | -0.48 | 0.30  |
| Sdad1    | Q80UZ2-2 | YLEIDSDEESR                                  | Y(1): 0.0; S(6): 99.9; S(10): 0.1                                                                                                                           | -0.48 | 0.04  |
| Mcf2l    | E9PXE2   | ALEQSHSLPLTPSSTSPK                           | S(5): 0.0; S(7): 0.0; T(12): 0.2; S(14): 24.5; S(15): 24.5; T(16): 24.5; S(17): 24.5; T(19): 2.0                                                            | -0.48 | 0.00  |
| Mroh2a   | F5H8M8   | CLGSLQGVSSSAMAEGMEALTK                       | S(4): 0.0; S(10): 0.1; S(11): 3.5; S(12): 3.5; T(22): 93.0                                                                                                  | -0.48 | -0.36 |
| Arhgap21 | B7ZCJ1   | DQGEVSPSEDEPFVWPGPK                          | S(7): 100.0; S(9): 0.0; S(15): 0.0                                                                                                                          | -0.49 | -0.04 |
| Rims1    | Q99NE5-5 | STSVSGEITYLEHNDGSQSDTAVGTGAGGK               | S(1): 0.0; T(2): 0.0; S(3): 0.0; S(5): 0.0; Y(9): 0.0; T(10): 0.3; S(17): 33.2; S(19): 33.2; T(21): 33.2; T(25): 0.3                                        | -0.49 | -0.10 |
| Rims1    | Q99NE5-5 | ASQSSLESSSGPPCIR                             | S(2): 0.0; S(4): 0.6; S(5): 99.4; S(8): 0.0; S(9): 0.0; S(10): 0.0                                                                                          | -0.49 | -0.40 |
| Cdk11b   | A2A9P6   | DLLSDLQDISDSER                               | S(4): 0.0; S(10): 99.8; S(12): 0.2                                                                                                                          | -0.49 | -0.09 |
| Nucks1   | Q80XU3   | VVDYSQFQESDDADEDYGR                          | Y(4): 0.0; S(5): 0.0; S(10): 100.0; Y(17): 0.0                                                                                                              | -0.50 | 0.30  |
| Jph3     | Q9ET77   | EFSPSFQHR                                    | S(3): 100.0; S(5): 0.0                                                                                                                                      | -0.50 | -0.20 |
| Znf830   | Q8R1N0   | KEEENVDSDEGELQDLSQDWR                        | S(8): 100.0; S(19): 0.0                                                                                                                                     | -0.50 | 0.37  |
| Nebl     | Q9DC07   | GFSIVTDTPELQR                                | S(3): 0.0; T(6): 0.2; T(8): 99.8                                                                                                                            | -0.50 | -0.39 |
| Trim28   | E9Q6J5   | GSDDVLVSGEVPCEVGHMSPR                        | S(2): 0.0; S(8): 0.0; S(20): 100.0                                                                                                                          | -0.50 | 0.66  |
| Pclo     | Q9QYX7   | LPTAVSLYSPTEQSVMQK                           | T(3): 0.0; S(6): 0.0; Y(8): 0.4; S(9): 49.8; T(11): 49.8; S(15): 0.0                                                                                        | -0.50 | 0.28  |
| Trim28   | Q62318   | RPAASSAAAAAASSPAGGGGEAQELLEHCGVCR            | S(5): 0.0; S(6): 0.0; S(11): 0.0; S(15): 50.0; S(16): 50.0                                                                                                  | -0.50 | 0.73  |
| Ptger4   | Q6NS82-3 | MASSGGGNTGAGGTSGLGLGLSLGMGEATGDAEEEEAAAEAVGR | S(3): 28.8; S(4): 28.8; T(9): 12.1; T(14): 12.1; S(15): 12.1; S(24): 5.6; T(31): 0.4                                                                        | -0.50 | 0.39  |
| Slc4a1   | P04919   | DHEEVLEIPDRDSEEELENIIGQIAYR                  | S(13): 100.0; Y(26): 0.0                                                                                                                                    | -0.50 | 0.28  |
| Akt2     | Q91VE4   | TSLGTEQHAAAAAASVAVCR                         | T(1): 0.1; S(2): 0.5; T(5): 99.3; S(18): 0.0                                                                                                                | -0.51 | 0.63  |
| Otud4    | Q60823   | YFDDEFTAQSITITPPDRYDLSLDPLELDQR              | Y(1): 0.0; T(7): 0.0; S(10): 24.9; T(12): 24.9; T(14): 24.9; Y(19): 24.9; S(21): 0.2                                                                        | -0.51 | 0.55  |
| Slc4a8   | B2RRE7   | EESEEDENEVSNILR                              | S(3): 6.3; S(4): 93.7; S(11): 0.0                                                                                                                           | -0.51 | 0.36  |
| Irf2bp1  | Q8JZR6-2 | DGQTVSPQSATNLEVK                             | T(4): 0.0; S(6): 100.0; S(9): 0.0; T(11): 0.0                                                                                                               | -0.52 | 0.52  |
| Skiv2l   | Q6NZR5   | LLEPLDLGGDEDEGEAAGGPR                        | S(8): 100.0                                                                                                                                                 | -0.52 | 0.20  |
| Irf2bp1  | Q8R3Y8-2 | AGGASPAASSTTQPPAQHR                          | S(5): 91.5; S(9): 7.7; S(10): 0.1; T(11): 0.7; T(12): 0.1                                                                                                   | -0.52 | 0.34  |
| Akap12   | Q9WTQ5   | AEPEILELESK                                  | S(10): 100.0                                                                                                                                                | -0.52 | 0.39  |
| Dlgap4   | B1AZP2-2 | SEVTSQSGLSNSDSDSSTRPPSVTR                    | S(1): 0.0; T(4): 0.0; S(5): 0.0; S(7): 0.0; S(10): 0.2; S(12): 0.2; S(13): 0.2; S(15): 0.0; S(18): 19.9; S(19): 19.9; T(20): 19.9; S(24): 19.9; T(26): 19.9 | -0.52 | -0.09 |
| Cdc26    | Q99JP4   | QKEDVEGVGTSDGEGAAGLSSDPK                     | T(10): 9.0; S(11): 91.0; S(20): 0.0; S(21): 0.0                                                                                                             | -0.52 | 0.80  |
| Dlg1     | H7BKY4   | NLSEIENVHGFVSHSHSPIK                         | S(3): 0.0; S(13): 0.0; S(15): 50.0; S(18): 50.0                                                                                                             | -0.52 | 0.25  |
| Slc12a5  | Q91V14   | NKGPSPVSSEGIK                                | S(5): 100.0; S(8): 0.0; S(9): 0.0                                                                                                                           | -0.53 | 0.06  |
| Slc12a5  | Q91V14   | ESSPFINSTDEK                                 | S(2): 50.0; S(3): 50.0; S(8): 0.0; T(9): 0.0; T(11): 0.0                                                                                                    | -0.53 | 0.18  |
| Pvr1l    | Q9JKF6   | AGIPQHHPMAQNLQYPDDSDDEK                      | Y(16): 0.7; S(20): 99.3                                                                                                                                     | -0.53 | 0.16  |
| Purb     | Q35295   | DSLGFIEHYAQLGPSSPEQLAAGAEEGGPR               | S(2): 0.0; Y(10): 0.0; S(16): 8.3; S(17): 91.7                                                                                                              | -0.53 | 0.24  |
| Polr2a   | Q8K019-2 | ADGDWDDQEVLDYFSDKESAK                        | Y(13): 50.0; S(15): 50.0; S(19): 0.0                                                                                                                        | -0.55 | 0.55  |
| Hook3    | Q8BUK6   | LNQSDSIEDPNPAGR                              | S(4): 0.0; S(6): 0.0; S(12): 100.0                                                                                                                          | -0.55 | -0.31 |
| Polr2a   | P08775   | YSPTSPTYSPK                                  | Y(1): 0.5; S(2): 0.5; T(4): 98.6; S(5): 0.5; T(7): 0.0; Y(8): 0.0; S(9): 0.0; T(11): 0.0; S(12): 0.0                                                        | -0.55 | 0.34  |
| Prdm2    | A2A7B5   | ETGSPPCFDEYK                                 | T(2): 2.9; S(4): 97.1; Y(11): 0.0                                                                                                                           | -0.56 | 0.03  |
| Ralgapa1 | Q6GYP7   | HFSQSEDTGNEVFGALHEEQPLPR                     | S(3): 99.4; S(5): 0.6; T(8): 0.0                                                                                                                            | -0.56 | 0.25  |



|          |          |                                 |                                                                                                                       |       |       |
|----------|----------|---------------------------------|-----------------------------------------------------------------------------------------------------------------------|-------|-------|
| Shisa6   | F6VQZ6   | QYNHPILSSATQPTHEKPR             | Y(2): 0.0; S(8): 0.0; S(9): 0.0; T(11): 0.0; T(13): 100.0; T(15): 0.0                                                 | -0.74 | 0.30  |
| Dock4    | P59764   | ASPLLSDK                        | S(2): 100.0; S(6): 0.0                                                                                                | -0.76 | 0.25  |
| Aak1     | Q3UHJ0-2 | EQGSSGLGSGSSGGSSGLGSGYIGR       | S(4): 0.0; S(5): 0.0; S(9): 47.3; S(11): 47.3; S(12): 5.5; S(17): 0.0; S(18): 0.0; S(19): 0.0; S(23): 0.0; Y(25): 0.0 | -0.76 | 0.66  |
| Plekha6  | P16014   | WASSREDAGAPVEDSQGQTK            | S(3): 50.0; S(4): 50.0; S(15): 0.0; T(19): 0.0                                                                        | -0.77 | 1.41  |
| Ppp1r17  | Q9Z2E4   | LDPQCSPSDDLSDQFIK               | S(6): 99.3; S(8): 0.7; S(12): 0.0                                                                                     | -0.77 | -0.29 |
| CR025    | Q8BH50   | RDSSSQLASTESDKPTTGR             | S(3): 50.0; S(4): 50.0; S(6): 0.0; S(10): 0.0; T(11): 0.0; S(13): 0.0; T(17): 0.0; T(18): 0.0                         | -0.79 | -0.24 |
| Kat7     | Q5SVQ0-4 | SSGSETEQVDFSDR                  | S(1): 0.6; S(2): 98.7; S(4): 0.6; T(6): 0.1; S(13): 0.0                                                               | -0.80 | -0.35 |
| Plcl2    | Q8K394   | EFQVSFQVQK                      | S(5): 100.0                                                                                                           | -0.81 | -0.06 |
| Gas7     | B1ATI9   | STGDSQNLGSSSPGR                 | S(1): 0.0; T(2): 0.0; S(5): 0.0; S(10): 8.2; S(11): 8.2; S(12): 83.5                                                  | -0.81 | -0.26 |
| Pclo     | Q9QYX7   | GGSLGCQTETDPTQSPPYMGATSPPKDK    | S(3): 0.0; T(8): 0.0; T(10): 0.0; T(14): 20.0; S(16): 20.0; Y(19): 20.0; T(23): 20.0; S(24): 20.0                     | -0.81 | 0.30  |
| Olf777   | Q8V FH3  | QAFND SVK                       | S(6): 100.0                                                                                                           | -0.87 | -0.08 |
| Kif17    | A2AM72   | EYQEEIK                         | Y(2): 100.0                                                                                                           | -0.87 | -0.03 |
| Plekha6  | Q7TQG1   | SIHEVDISNLEAALR                 | S(1): 100.0; S(8): 0.0                                                                                                | -0.87 | 0.61  |
| N4bp3    | A2A699   | TGLCSPEDNSLTPLLDEVVAPEGR        | T(1): 3.3; S(5): 92.8; S(10): 0.7; T(12): 3.3                                                                         | -0.94 | 1.30  |
| Dmxl2    | Q8C7U1   | AQLLHALSLDEGGPEPSLSDSSSGSFGR    | S(8): 0.8; S(17): 58.2; S(19): 12.6; S(21): 12.6; S(22): 12.6; S(23): 3.0; S(26): 0.2                                 | -0.95 | 0.99  |
| Fam131b  | Q3TY60-2 | KVSDVTSSGVQSFDEEEGDANN          | S(3): 0.0; T(6): 0.0; S(7): 0.0; S(8): 0.0; S(12): 100.0                                                              | -1.01 | -0.20 |
| Dmxl2    | Q8BPN8-2 | ALLTPQDEECADGDEVDVIAEQLK        | T(4): 99.3; T(15): 0.7                                                                                                | -1.02 | 0.42  |
| Scaf8    | Q6DID3   | ASEPVKEPVQTAQSPAPVEK            | S(2): 0.0; T(11): 1.2; S(14): 98.8                                                                                    | -1.04 | 0.56  |
| Sptbn2   | Q68FG2   | WDLPSDWDNDSSSAR                 | S(6): 100.0; S(12): 0.0; S(13): 0.0; S(14): 0.0                                                                       | -1.07 | -0.37 |
| Osbp     | Q3B7Z2   | GDMSDEDDENEFFDAPEITMPENLGHK     | S(4): 100.0; T(20): 0.0                                                                                               | -1.08 | 0.85  |
| Pafah1b2 | A2AHG0   | GAAGGSSTPTPQHGEK                | S(6): 33.3; S(7): 33.3; T(8): 33.3; T(10): 0.0                                                                        | -1.09 | 0.69  |
| Sirt2    | Q61206   | ELFSPHALNFGIGDTR                | S(4): 100.0; T(17): 0.0; T(18): 0.0                                                                                   | -1.12 | 0.45  |
| Slc6a11  | P31650   | GSETLGGGGGAAGTR                 | S(2): 100.0; T(4): 0.0; T(15): 0.0                                                                                    | -1.12 | -0.36 |
| Sirt2    | Q8VDQ8-2 | REHANIDAQSGSQANPSTTISP GK       | S(10): 0.0; S(12): 0.0; S(18): 47.9; T(19): 47.9; T(20): 3.9; S(22): 0.3                                              | -1.17 | 0.77  |
| Add1     | Q9QYCO   | SPPDQSAVPNTPPSTPVKLEEDLPQEPTSR  | S(1): 0.0; S(6): 0.5; T(11): 33.2; S(14): 33.2; T(15): 33.2; T(28): 0.0; S(29): 0.0                                   | -1.29 | -0.16 |
| Bsn      | Q88737   | RPHLSITPEAFDSDEELGDILEEDDSLAWGR | S(4): 0.0; S(6): 0.0; T(8): 0.0; S(14): 100.0; S(27): 0.0                                                             | -1.33 | 1.00  |
| Cacna1g  | F6RJ39   | APVVLQPEQIVSEETPPPLTK           | S(12): 0.0; T(16): 100.0; T(22): 0.0                                                                                  | -1.34 | 0.92  |
| Ap3d1    | O54774   | VDIITEEMPENALPSDEDDKDPNDPYR     | T(5): 0.0; S(15): 100.0; Y(26): 0.0                                                                                   | -1.60 | -0.41 |
| Il16     | O54824   | SASPETPASPGK                    | S(1): 0.9; S(3): 98.2; T(6): 0.9; S(9): 0.0                                                                           | -1.72 | 0.19  |



**Supplementary Table S4. Proteins up and down phosphorylated in the hippocampus of Ts65Dn mice and reverted by L41 treatment.**

| Gene name     | Protein Group Accessions | Sequence                        | phosphoRS Site Probabilities                                                                   | Ts65Dn vs WT | Ts65Dn +/-L41 |
|---------------|--------------------------|---------------------------------|------------------------------------------------------------------------------------------------|--------------|---------------|
| Sart1         | Q9Z315                   | ASSGDASSLSIIEETNK               | S(2): 20.0; S(3): 20.0; S(7): 20.0; S(8): 20.0; S(10): 20.0                                    | 4.08         | -3.82         |
| Synpr         | D3Z5Q8                   | QASDWHSLSTLQLSLGLYK             | S(3): 10.1; S(7): 89.9; S(9): 0.0; S(14): 0.0                                                  | 2.79         | -2.95         |
| Eif2ak4       | A2AUM0                   | EILDGLAYIHEK                    | Y(8): 100.0                                                                                    | 2.74         | -2.62         |
| Fryl          | F8VQ05                   | EDVLSGFVYFIVR                   | S(5): 0.0; Y(9): 100.0                                                                         | 2.68         | -1.37         |
| Specc1        | Q5SXY1                   | GSPTGSSPNNASELSLASLSTEK         | S(2): 23.7; T(4): 23.7; S(6): 23.7; S(7): 23.7; S(12): 4.4; S(15): 0.9; S(18): 0.0; T(20): 0.0 | 2.59         | -1.89         |
| Tcp1111       | Q8BTG3                   | QEAENGALDISK                    | S(11): 100.0                                                                                   | 2.48         | -1.94         |
| Myo1c         | Q9WTI7-2                 | RDQAVMISGESGAGK                 | S(8): 92.4; S(11): 7.6                                                                         | 2.37         | -2.01         |
| Crocc         | Q8CJ40                   | TADTSDGSLRGFSGQR                | T(1): 0.1; T(4): 3.7; S(5): 66.8; S(8): 14.7; S(13): 14.7                                      | 2.12         | -1.68         |
| Clip2         | Q9Z0H8                   | TGNESGNSLSDSGSVK                | S(5): 0.0; S(7): 91.1; S(10): 8.9; S(12): 0.0; S(14): 0.0                                      | 2.08         | -3.05         |
| Cys1          | Q8R4T1                   | DPRPATPSGGR                     | T(6): 91.3; S(8): 8.7                                                                          | 1.87         | -2.15         |
| Sipa111       | Q8C0T5                   | RHQSDGNEIAHTR                   | S(4): 100.0; T(12): 0.0                                                                        | 1.84         | -1.42         |
| Klh41         | A2AUC9                   | LYQSTLLQDGLK                    | Y(2): 0.5; S(4): 6.3; T(5): 93.2                                                               | 1.35         | -1.11         |
| Sirt2         | Q8VDQ8                   | REHANIDAQSGSQAPNPSTTISPGKSPPPAK | S(10): 0.0; S(12): 0.0; S(18): 0.7; T(19): 0.7; T(20): 32.9; S(22): 32.9; S(26): 32.9          | 1.33         | -0.84         |
| Palmd         | Q9JHU2                   | SNGPHTSPTRPTQPR                 | S(1): 0.0; T(5): 0.3; T(7): 49.7; S(8): 49.7; T(10): 0.3; T(13): 0.0                           | 1.15         | -1.30         |
| Arhgef2       | H3BJU7                   | LSPPHSPR                        | S(2): 100.0; S(6): 0.0                                                                         | 1.13         | -1.17         |
| Begain        | F8WIG2                   | YYGGGGGGAAGGGSPGDKAEGR          | S(15): 100.0                                                                                   | 1.13         | 0.53          |
| Enah          | Q03173-4                 | NSRPSSPVNTPSSQPAAK              | S(2): 0.0; S(5): 5.0; S(6): 95.0; T(10): 0.0; S(12): 0.0; S(13): 0.0                           | 1.11         | -0.42         |
| Cdh10         | P70408                   | RTPTAPDNTDVR                    | T(2): 100.0; T(4): 0.0; T(9): 0.0                                                              | 1.10         | -1.16         |
| Map1b         | P14873                   | SEQSSMSIEFGQESPEHSLAMDFSR       | S(1): 0.0; S(4): 0.0; S(5): 0.4; S(7): 49.6; S(14): 49.6; S(18): 0.4; S(24): 0.0               | 1.06         | -0.17         |
| Apoa1bp       | Q8K4Z3                   | RGSETMAGAAVK                    | S(3): 50.0; T(5): 50.0                                                                         | 1.03         | 0.44          |
| C2cd2l        | Q80X80                   | SLSPAATVTAELHYEQGSPR            | S(1): 0.0; S(3): 0.0; T(7): 0.0; T(9): 0.0; Y(14): 0.0; S(18): 100.0                           | 1.03         | -0.82         |
| Sipa113       | G3X9J0                   | SSSEITLSECDVEEPPDPR             | S(1): 8.5; S(2): 8.5; S(3): 83.1; T(6): 0.0; S(8): 0.0                                         | 0.97         | -0.62         |
| Col4a1        | P02463                   | GFPGPPGPDGLPGSMGPPGTPSVDHGFVTR  | S(14): 98.9; T(20): 1.1; S(22): 0.0; T(30): 0.0                                                | 0.96         | -0.64         |
| Smg6          | P61406                   | QVLSSTDSLDEDR                   | S(3): 1.5; S(5): 10.8; S(6): 86.1; T(7): 1.5; S(9): 0.0                                        | 0.96         | -0.55         |
| Rltpr         | Q3V3V9-2                 | LEAPPSPLSGSLGSKPLPPYPTPESSPER   | S(6): 0.0; S(8): 0.0; S(11): 0.0; S(15): 0.0; S(26): 50.0; S(27): 50.0                         | 0.94         | -0.11         |
| 1700065D16Rik | Q7TSG0                   | QPPPAPGFSTAASGGEGGASTEPR        | S(9): 80.9; T(10): 18.4; S(13): 0.3; S(20): 0.3; T(21): 0.0                                    | 0.93         | -0.61         |
| Hn1           | P97825                   | SNSSEASSGDFDLK                  | S(1): 0.0; S(3): 50.0; S(4): 50.0; S(7): 0.0; S(8): 0.0                                        | 0.92         | -0.66         |
| Gbf1          | Q6A099                   | ADAPDAGAQSDELPSYHQNDVSLDR       | S(10): 49.7; S(12): 49.7; S(16): 0.3; Y(17): 0.3; S(23): 0.0                                   | 0.89         | -0.60         |
| Stk32c        | Q8QZV4                   | RGSSAAAPSPPPPGR                 | S(3): 0.0; S(4): 0.0; S(10): 0.0; S(11): 100.0                                                 | 0.88         | -1.06         |
| Grin2b        | G3X9V4                   | RQHSYDTFVLDLQK                  | S(4): 48.4; Y(5): 48.4; T(7): 3.2                                                              | 0.88         | -0.69         |
| Cask          | O70589                   | TQSSSCERDSPSTSR                 | T(1): 0.8; S(3): 0.8; S(4): 0.0; S(5): 0.0; S(10): 97.7; S(12): 0.0; T(13): 0.8; S(14): 0.0    | 0.86         | -0.71         |
| Syk           | E9PWE9                   | ELNGTYAISGGR                    | T(5): 50.0; Y(6): 50.0; S(9): 0.0                                                              | 0.84         | -0.52         |
| Lgalsl        | Q8VED9                   | LDDGHLNNSLGSPVQADVYFPR          | S(9): 0.0; S(12): 100.0; Y(19): 0.0                                                            | 0.83         | 0.17          |
| Gphn          | A0JNY3                   | DTASLSTTPSESPR                  | S(4): 0.0; S(6): 0.0; S(10): 0.9; S(12): 99.0                                                  | 0.79         | -1.00         |
| Tnks1bp1      | P58871                   | SAEEGEVTESK                     | S(1): 0.0; S(10): 100.0                                                                        | 0.78         | -0.51         |
| Prrc2c        | Q3TLH4-5                 | ATSTSPNSQSSK                    | T(2): 0.0; S(3): 0.0; T(4): 4.6; S(5): 95.4; S(8): 0.0; S(10): 0.0; S(11): 0.0                 | 0.76         | -1.08         |
| R3hdm2        | Q80TM6-2                 | SLEPRPWSSTSDSGSVR               | S(1): 0.0; S(8): 33.3; S(9): 33.3; T(10): 33.3; S(12): 0.2; S(15): 0.0                         | 0.73         | -0.45         |
| Slc7a14       | Q8BXR1                   | HKQNSEALIANDELDCSPE             | S(5): 0.0; S(17): 100.0                                                                        | 0.72         | -0.14         |
| Map1a         | Q9QYR6                   | SPELSSPAMEDLAMEWGGK             | S(1): 0.0; S(4): 0.3; S(6): 5.0; S(7): 94.7                                                    | 0.72         | -0.03         |
| Ube2w         | D6RCG4                   | ELLALQNDPPPGMTLNEK              | T(14): 100.0                                                                                   | 0.71         | -0.52         |
| Cacnb2        | Q8CC27                   | TLASSTLPLSPTLASNSQGSQGDQRPDR    | S(4): 85.0; S(5): 14.4; S(10): 0.5; S(15): 0.0; S(17): 0.0; S(20): 0.0                         | 0.70         | -0.76         |
| Wipf2         | Q6PEV3                   | HSSSAPPPPPPGR                   | S(2): 0.3; S(3): 0.3; S(4): 99.3                                                               | 0.70         | -0.68         |
| Cep170b       | Q80U49                   | HEDGTQSDSEDPLAK                 | T(5): 33.3; S(7): 33.3; S(9): 33.3                                                             | 0.69         | -1.01         |

|          |          |                                |                                                                                                                                    |      |       |
|----------|----------|--------------------------------|------------------------------------------------------------------------------------------------------------------------------------|------|-------|
| Atad3a   | H3BKE0   | TPTLVDSSETDLR                  | T(1): 2.2; T(3): 10.4; S(7): 10.4; S(8): 10.4; S(9): 10.4; T(11): 56.0                                                             | 0.69 | -0.21 |
| Prkcb    | P68404   | QPVELTPTDK                     | T(6): 100.0; T(8): 0.0                                                                                                             | 0.68 | -1.25 |
| Dnaic2   | R4GML5   | ISEPIEVVIMDISR                 | S(2): 100.0; S(13): 0.0                                                                                                            | 0.68 | -0.43 |
| Cep170b  | Q80U49   | HEDGTQSDSEDPLAK                | T(5): 0.8; S(7): 98.5; S(9): 0.8                                                                                                   | 0.67 | -0.88 |
| Tubb6    | Q922F4   | LTTPTYGDLNHLVSATMSGVTTSLR      | T(2): 0.0; T(3): 0.0; T(5): 0.0; Y(6): 0.0; S(14): 1.7; T(16): 10.2; S(18): 66.1; T(21): 10.2; T(22): 10.2; S(23): 1.7             | 0.67 | -1.09 |
| Bsn      | O88737   | SPQVLYSPVSPSPHR                | S(1): 0.0; S(7): 0.0; S(10): 0.2; S(13): 99.8                                                                                      | 0.67 | -0.19 |
| Pfas     | Q5SUR0   | TGQGDAPLTPPTVDLDDWVLGK         | T(1): 0.0; T(9): 1.1; T(12): 98.9                                                                                                  | 0.67 | 0.12  |
| Irf2bpl  | Q8K3X4   | NSSSPVSPASVPGQR                | S(2): 0.1; S(3): 0.3; S(4): 0.3; S(7): 3.6; S(10): 95.8                                                                            | 0.67 | -1.18 |
| Nudt3    | Q9JI46   | SESEEEVLLVSSSR                 | S(1): 0.0; S(3): 100.0; S(11): 0.0; S(12): 0.0; S(13): 0.0                                                                         | 0.65 | 0.34  |
| Tbc1d22a | Q8R5A6   | SVSESHTPCPSESTGDTVPLQR         | S(1): 1.6; S(3): 85.6; S(5): 11.2; T(7): 1.6; S(11): 0.0; S(13): 0.0; T(14): 0.0; T(17): 0.0                                       | 0.65 | -0.43 |
| Ace      | P09470   | GPQFGSEVELR                    | S(6): 100.0                                                                                                                        | 0.65 | -0.44 |
| Nktr     | P30415   | SRASSSSSHSSK                   | S(1): 0.0; S(4): 0.0; S(5): 0.0; S(6): 0.0; S(7): 1.2; S(8): 1.2; S(11): 87.9; S(12): 9.7                                          | 0.64 | -0.64 |
| Arhgef28 | G5E8P2   | LSLPMAGHGDDAGDGAENILYL         | S(2): 96.9; Y(23): 3.1                                                                                                             | 0.64 | -0.23 |
| Scg2     | Q03517   | EHLGPGSSQEMER                  | S(7): 2.8; S(8): 97.2                                                                                                              | 0.62 | 0.26  |
| Prkce    | P16054   | KLAAGAESPQPASGNPSSEDDR         | S(8): 100.0; S(13): 0.0; S(16): 0.0; S(18): 0.0                                                                                    | 0.62 | 0.23  |
| Vps35    | Q9EQH3   | RESPESEGPYIEGLIL               | S(3): 93.6; S(6): 6.4; Y(11): 0.0                                                                                                  | 0.62 | -0.45 |
| Dmtn     | Q9WV69   | KGAESEEEEEEDDSEEEIK            | S(14): 100.0                                                                                                                       | 0.62 | -1.21 |
| Fam171a2 | A2A699   | SVEGPGGLEPSLDEYR               | S(1): 100.0; S(11): 0.0; Y(15): 0.0                                                                                                | 0.60 | -0.15 |
| Sept2    | P42128   | EGSPIPHDPDLGSK                 | S(3): 100.0; S(13): 0.0                                                                                                            | 0.60 | -0.36 |
| Polk     | Q9QUG2-2 | TRASTVPAAIATAEIEFAIAK          | T(1): 80.3; S(4): 9.8; T(5): 9.8; S(11): 0.0; T(12): 0.0                                                                           | 0.60 | -0.78 |
| Rrp12    | Q6P5B0   | AMDLAQAGSTVESK                 | S(9): 0.0; S(13): 100.0                                                                                                            | 0.60 | -0.32 |
| Aak1     | Q3UJH0-2 | ILSDVTHSAVFGVPASK              | S(3): 0.4; T(6): 93.9; S(8): 5.7; S(16): 0.0                                                                                       | 0.59 | -0.02 |
| Kcnab2   | P62482   | MYPESTTGSPAR                   | S(5): 0.1; S(9): 99.9                                                                                                              | 0.58 | 0.23  |
| Aldh1a2  | Q62148   | LAFSLGSVWR                     | S(4): 100.0; S(7): 0.0                                                                                                             | 0.58 | -0.19 |
| Pvrl1    | Q9JKF6   | AGIPQHHPMAQNLQYPDDSDDEK        | Y(16): 0.0; S(20): 100.0                                                                                                           | 0.58 | -0.74 |
| Lmna     | P48678   | LRLSPSPTSQR                    |                                                                                                                                    | 0.58 | -0.14 |
| Ap3d1    | O54774   | HSSLPTSEDEDIAPAQR              | S(2): 0.0; S(3): 0.0; T(6): 0.0; S(8): 100.0                                                                                       | 0.58 | -0.79 |
| Sept9    | A2A6U3   | SFEVEEIEPPNSTPPR               | S(1): 100.0; S(12): 0.0; T(13): 0.0                                                                                                | 0.58 | -0.58 |
| Hcn2     | O88703   | RDSASPGAASGLDPLDSAR            | S(3): 8.9; S(5): 91.1; S(10): 0.0; S(17): 0.0                                                                                      | 0.58 | -0.19 |
| Ppp1r18  | Q8BQ30   | EEAEAQRPLR                     |                                                                                                                                    | 0.56 | -0.38 |
| Utp20    | Q5XG71   | EVMEANLPSILLK                  | S(9): 100.0                                                                                                                        | 0.56 | -0.75 |
| Gm14597  | B1AXE0   | VLAFFEEDPLSHELK                |                                                                                                                                    | 0.55 | -0.69 |
| Map1b    | P14873   | TTRSPDTSAYCYETMEK              | T(1): 0.2; T(2): 0.2; S(4): 99.5; T(7): 0.0; S(8): 0.0; Y(10): 0.0; Y(12): 0.0; T(14): 0.0                                         | 0.55 | -0.56 |
| Eno1     | P17182   | YDLDFKSPDDPSR                  |                                                                                                                                    | 0.55 | -0.26 |
| Nap1l4   | Q78ZA7   | ASGDGSLDEDESEFTLASDFEIGHFFR    | S(2): 0.0; S(7): 100.0; S(12): 0.0; T(15): 0.0; S(18): 0.0                                                                         | 0.55 | -0.34 |
| Arhgef12 | F8VQN6   | SEGVQDAQEPQSLVGGSPSTR          | S(1): 0.0; S(12): 49.0; S(16): 49.0; S(18): 1.0; T(19): 1.0                                                                        | 0.55 | 0.02  |
| Sept2    | P42208   | IYHLPDAESDEDEDFKEQTR           | S(9): 100.0                                                                                                                        | 0.54 | -0.42 |
| Prkce    | P16054   | LAAGAESPQPASGNPSSEDDR          | S(7): 100.0; S(12): 0.0; S(15): 0.0; S(17): 0.0                                                                                    | 0.54 | -0.02 |
| Sdc4     | O35988   | VSMSSTAQGSNIFER                | S(2): 0.7; S(4): 0.7; S(5): 5.4; T(6): 46.6; S(10): 46.6                                                                           | 0.54 | -0.21 |
| Aff4     | Q9ESC8   | LSPGNSGSYSSGGSSASASGSSVTIPQK   | S(2): 0.7; S(6): 0.1; S(8): 2.9; S(10): 12.6; S(11): 58.7; S(14): 12.6; S(15): 2.9; S(17): 2.9; S(19): 2.9; S(21): 2.9; S(22): 0.7 | 0.53 | -0.55 |
| Ap2a1    | P17426-2 | RDTSSNDINGGVEPTSTVSTPSPADLLGLR | T(3): 0.0; S(4): 0.0; S(5): 0.0; T(15): 0.0; S(17): 1.5; T(18): 1.5; S(20): 1.5; T(21): 10.7; S(23): 83.5; S(25): 1.5              | 0.53 | -0.21 |
| Slc2a13  | Q3UHK1   | GSNYHLSNDNDASDVE               | S(2): 0.0; Y(4): 0.0; S(7): 0.0; S(12): 100.0                                                                                      | 0.52 | -0.60 |
| Lppr4    | Q7TME0   | MSLQVMDTEPEGQSPPR              | S(2): 0.0; T(8): 0.0; S(14): 100.0                                                                                                 | 0.51 | -0.06 |
| Zfp3611  | P23950   | AVGTPAGGGFPR                   | T(4): 100.0                                                                                                                        | 0.50 | -0.67 |
| Tsg101   | Q61187   | QILNLYAEENAIEDTIFYLGEALR       | Y(6): 50.0; T(15): 50.0; Y(18): 0.0                                                                                                | 0.50 | -0.39 |
| Slc1a4   | O35874   | SEEETSPLVTHQNAPGVAIAPELESK     | S(1): 0.0; T(5): 98.9; S(6): 1.1; T(10): 0.0; S(26): 0.0                                                                           | 0.50 | -0.41 |
| Hepacam  | Q640R3   | STTEPGPPGYSPVPPVGRSPGLPIR      | S(1): 0.0; S(11): 0.0; S(13): 0.0; S(20): 100.0                                                                                    | 0.49 | -0.07 |

|                                         |          |                                |                                                                                                                                               |      |       |
|-----------------------------------------|----------|--------------------------------|-----------------------------------------------------------------------------------------------------------------------------------------------|------|-------|
| Sirt2                                   | Q8VDQ8   | EHANIDAQSGSQAPNPSTTISPGKSPPPAK | S(9): 0.0; S(11): 0.0; S(17): 42.8; T(18): 42.8; T(19): 6.6; S(21): 1.1; S(25): 6.6                                                           | 0,49 | -0,17 |
| Slc17a6                                 | Q8BLE7   | YASILMGISDGVGTLGSMVCPIIVGAMTK  |                                                                                                                                               | 0,49 | -0,46 |
| Nsmf                                    | A2AJ96   | MYSVDGVSDDDVPIR                | Y(2): 0.0; S(3): 100.0; S(8): 0.0                                                                                                             | 0,48 | 0,23  |
| Ppme1                                   | Q8BVQ5   | QCEGITSPEGSK                   | T(6): 4.7; S(7): 95.3; S(11): 0.0                                                                                                             | 0,47 | -0,24 |
| CF057                                   | Q8BTE0   | FDSLEDSPEEREPLQK               | S(3): 100.0; S(7): 0.0                                                                                                                        | 0,47 | 0,27  |
| Aldoa                                   | P05064   | GILAADESTGSIK                  | S(8): 0.3; T(9): 5.5; S(11): 94.2                                                                                                             | 0,47 | -0,01 |
| Gpr123                                  | Q8C4G9   | ALPCPGADQPPYPK                 | Y(12): 100.0                                                                                                                                  | 0,45 | 0,22  |
| Atcay                                   | Q8BHE3   | LGGAVEDSSSPSTLNLGSAHR          | S(8): 0.5; S(9): 0.5; S(10): 99.1; S(13): 0.0; T(14): 0.0; S(18): 0.0                                                                         | 0,44 | -0,12 |
| Vps13d                                  | B1ART1   | EKDDVSPQPLMTDLER               | S(6): 100.0; T(12): 0.0                                                                                                                       | 0,44 | -0,30 |
| Hnrpa0                                  | Q9CX86   | LFIGGLNVQTSSEGLR               |                                                                                                                                               | 0,44 | -0,25 |
| Sbf1                                    | Q6ZPE2   | ALYLEPSDGVSPQTETGEAQSQDDER     | Y(3): 0.1; S(7): 82.3; S(11): 8.8; T(13): 8.8; T(16): 0.0; S(21): 0.0                                                                         | 0,44 | -0,13 |
| Kcna2                                   | P63141   | ETEGEEQAQYLQVTSCKP             | T(2): 0.0; Y(10): 0.0; T(14): 0.0; S(15): 100.0                                                                                               | 0,43 | -0,27 |
| Gm15800                                 | E9Q2E4   | TEGTPPPPGQPAK                  | T(1): 0.8; T(4): 99.2                                                                                                                         | 0,43 | -0,74 |
| Wwp1                                    | Q8BZZ3   | SSSPPIEQNGDALHENGDPATR         | S(1): 0.4; S(2): 49.8; S(3): 49.8; T(23): 0.0                                                                                                 | 0,43 | -0,38 |
| Vmn1r84                                 | Q8R284   | HLTLANSLVIISR                  |                                                                                                                                               | 0,43 | -0,34 |
| Nlrp5                                   | Q9R1M5-7 | LLFSNQLNK                      | S(4): 100.0                                                                                                                                   | 0,42 | -0,13 |
| Pigx                                    | F6WL03   | LAADFSDAPFSAVCPQQLTR           | S(6): 49.7; S(11): 49.7; T(20): 0.7                                                                                                           | 0,42 | -0,17 |
| Rgs14                                   | P97492   | EPGSSHLGSPDTR                  | S(4): 0.0; S(5): 0.7; S(9): 99.2; T(12): 0.0                                                                                                  | 0,42 | -0,11 |
| Rab12                                   | P35283   | RPAGGSLGAVSPALSGGQAR           | S(6): 100.0; S(11): 0.0; S(15): 0.0                                                                                                           | 0,42 | -0,02 |
| Apoe                                    | P08226   | NEVHTMLGQSTEEIR                | T(5): 0.0; S(10): 50.0; T(11): 50.0                                                                                                           | 0,42 | -0,21 |
| Mtdh                                    | Q80WJ7   | SETNWESPK                      | S(1): 0.0; S(7): 100.0                                                                                                                        | 0,41 | 0,03  |
| Arfp2                                   | Q8K221   | HPSHSTSPSGPGDEVAR              | S(3): 0.0; S(5): 0.4; T(6): 49.8; S(7): 49.8; S(9): 0.0                                                                                       | 0,41 | -0,44 |
| Iqsec2                                  | A4GZ26   | SSSPGAGGGHSTSTSTSPATTLQR       | S(1): 7.9; S(2): 46.1; S(3): 46.1; S(11): 0.0; T(12): 0.0; S(13): 0.0; T(14): 0.0; S(15): 0.0; T(16): 0.0; S(17): 0.0; T(20): 0.0; T(21): 0.0 | 0,40 | 0,17  |
| Pclo                                    | Q9QYX7   | TIELNSTVTDK                    | S(6): 100.0                                                                                                                                   | 0,40 | 0,37  |
| Stim1                                   | P70302   | LIEGVHPGSLVEK                  |                                                                                                                                               | 0,39 | -0,16 |
| Gprin1                                  | Q3UNH4   | SVATGPMTPQAAAPPVPPVFPEVR       | S(1): 0.2; T(4): 10.3; T(8): 89.6                                                                                                             | 0,39 | -0,27 |
| Krt26                                   | Q3TRJ4   | EALSEELTYLQK                   | S(4): 0.0; T(8): 50.0; Y(9): 50.0                                                                                                             | 0,39 | 0,20  |
| Dmtn                                    | Q9WV69   | LQSTEFSPSGSEAGSPGLQNGEGQR      | S(3): 0.1; T(4): 0.8; S(7): 99.1; S(9): 0.1; S(11): 0.0; S(15): 0.0                                                                           | 0,39 | -0,27 |
| Abi2                                    | P62484   | ALFDSYTNLER                    | S(5): 33.3; Y(6): 33.3; T(7): 33.3                                                                                                            | 0,39 | 0,08  |
| Rasal1                                  | Q9Z268   | LLEDSSLDTEVDPR                 | S(5): 7.6; S(6): 92.4; T(9): 0.1                                                                                                              | 0,39 | -0,78 |
| Uncharacterized protein C4orf21 homolog | Q0VGT4   | SSSELSEVINMSSLK                | S(1): 0.5; S(2): 2.3; S(3): 12.9; S(6): 0.5; S(13): 83.9                                                                                      | 0,38 | -0,06 |
| Stx1a                                   | O35526   | TTTSEELEDMLSEGNPAIFASGIHMSSISK | T(1): 42.2; T(2): 42.2; T(3): 7.1; S(4): 7.1; S(13): 1.3; S(21): 0.0; S(27): 0.0; S(28): 0.0; S(30): 0.0                                      | 0,38 | 0,08  |
| Fam122a                                 | Q9DB52   | SNSAPLIHGLSDSSPVFQAEAPSAR      | S(1): 9.9; S(3): 90.1; S(11): 0.0; S(13): 0.0; S(14): 0.0; S(23): 0.0                                                                         | 0,38 | -0,54 |
| Sptbn1                                  | Q62261   | ESSPVPSPTLDR                   | S(2): 93.7; S(3): 6.3; S(7): 0.0; T(9): 0.0                                                                                                   | 0,38 | -0,22 |
| Rps6kc1                                 | Q8BLK9-2 | SSQESLDIK                      | S(1): 0.0; S(2): 5.7; S(5): 94.3                                                                                                              | 0,38 | -0,11 |
| Mycbpap                                 | Q5SUV2-2 | LAAHEAITIAQSVLQDLLR            | T(8): 50.0; S(12): 50.0                                                                                                                       | 0,38 | -0,02 |
| Hecw2                                   | Q616G8   | SNSIQMQEQLNR                   | S(1): 0.1; S(3): 99.9                                                                                                                         | 0,38 | -0,24 |
| Diras2                                  | Q5PR73   | CDESPNREVQSSEAEALAR            | S(4): 100.0; S(11): 0.0; S(12): 0.0                                                                                                           | 0,38 | 0,09  |
| Atp8a1                                  | P70704   | TDDVSEKTLADQEEVR               | T(1): 0.0; S(5): 33.3; T(8): 33.3; S(9): 33.3                                                                                                 | 0,37 | -0,16 |
| Uba1                                    | Q02053   | IHVSDQELQSANASVDDSR            | S(4): 99.4; S(10): 0.6; S(14): 0.0; S(18): 0.0                                                                                                | 0,37 | -0,48 |
| Pgbd5                                   | D3YZI9   | ELLGLEDSPPAH                   | S(8): 4.5; S(9): 95.5                                                                                                                         | 0,37 | -0,10 |
| Acot7                                   | Q91V12-2 | MTFTSNK                        | T(2): 100.0; T(4): 0.0; S(5): 0.0                                                                                                             | 0,37 | -0,03 |
| Mybl1                                   | E9QLX9   | SCKQEHSASVK                    | S(1): 0.0; S(7): 7.8; S(9): 92.2                                                                                                              | 0,37 | -0,37 |
| Pacsin1                                 | Q61644   | STSGPGMPMNWPQFEENPDLPHTTAK     | S(1): 0.0; T(2): 0.0; S(3): 1.1; T(24): 97.9; T(25): 1.1                                                                                      | 0,36 | -0,18 |
| Enah                                    | Q03173-4 | NSRPSSPVNTPSSQPAAK             | S(2): 3.1; S(5): 48.5; S(6): 48.5; T(10): 0.0; S(12): 0.0; S(13): 0.0                                                                         | 0,36 | -0,44 |
| Wdr44                                   | Q6NVE8   | EYVSNDAQSDDEEKLSQQTDTDGGR      | Y(2): 0.0; S(4): 0.4; T(8): 49.8; S(10): 49.8; S(18): 0.0; T(21): 0.0; T(23): 0.0                                                             | 0,36 | -0,08 |
| Gga3                                    | Q8BMI3   | TLIPSPPPRPK                    |                                                                                                                                               | 0,36 | -0,15 |
| Iitm2c                                  | Q91VK4   | AAASGPASASAPAAEILLTPAR         | S(4): 0.0; S(8): 0.0; S(10): 0.0; T(19): 100.0                                                                                                | 0,36 | 0,14  |

|          |          |                             |                                                                                                        |       |       |
|----------|----------|-----------------------------|--------------------------------------------------------------------------------------------------------|-------|-------|
| Ncor2    | E9Q9V3   | EGTPPPPPPPR                 | T(3): 100.0                                                                                            | 0,36  | -0,57 |
| Abcf1    | Q6P542   | SKPAAADSEGEEDTAK            | S(1): 0.0; S(8): 100.0; T(17): 0.0                                                                     | 0,36  | 0,32  |
| Fam117b  | Q3U3E2   | TSPTVATQTGASVTSTR           | T(1): 1.2; S(2): 98.6; T(4): 0.2; T(7): 0.0; T(9): 0.0; S(12): 0.0; T(14): 0.0; S(15): 0.0; T(16): 0.0 | 0,35  | 0,27  |
| Slc4a4   | E9Q8N8   | MFSNPDNGSPAMTHR             | S(3): 0.0; S(9): 100.0; T(13): 0.0                                                                     | 0,35  | -0,28 |
| Slc9a6   | A1L3P4   | LVLPMDDSEPALNSLDDTRHSPA     | S(8): 0.0; S(14): 0.0; T(18): 0.7; S(21): 99.3                                                         | 0,35  | 0,37  |
| Pacsin1  | Q61644   | GRLDSGQLGLYPANYVEAI         | S(5): 100.0; Y(11): 0.0; Y(15): 0.0                                                                    | 0,35  | 0,07  |
| Mug2     | P28666   | FDLAFSSEVSGTLQK             | S(6): 49.8; S(7): 49.8; S(10): 0.3; T(12): 0.0                                                         | 0,34  | -0,02 |
| Rph3a    | P47708   | WHQLQENHVVSSD               | S(11): 50.0; S(12): 50.0                                                                               | 0,34  | -0,13 |
| Son      | Q9QX47-3 | ESAQAVAVALSPPK              | S(2): 0.0; S(11): 100.0                                                                                | 0,34  | -0,10 |
| Map1b    | P14873   | SQGSTSNSDWMK                | S(1): 0.0; S(4): 93.3; T(5): 5.9; S(6): 0.4; S(8): 0.4                                                 | 0,34  | 0,13  |
| Rab3a    | P63011   | MSESLDTADPAVTGAK            | S(2): 100.0; S(4): 0.0; T(7): 0.0; T(13): 0.0                                                          | 0,34  | 0,06  |
| Srrm2    | Q8BT18-3 | SGAGSPPGK                   | S(1): 0.0; S(5): 100.0                                                                                 | -0,67 | 0,12  |
| Commd7   | A2AU52   | FGVTSGSSELEK                | T(4): 0.0; S(5): 0.0; S(7): 95.0; S(8): 5.0                                                            | -0,67 | 0,37  |
| Ablim3   | Q69ZX8   | YTSDEMLER                   | Y(1): 3.9; T(2): 92.2; S(3): 3.9                                                                       | -0,67 | 0,28  |
| Khsrp    | Q3U0V1   | VQISPDSSGLPER               | S(4): 100.0; S(7): 0.0                                                                                 | -0,67 | 0,30  |
| Lrig3    | Q6P1C6   | NVDGLTFQGLGALK              | T(6): 100.0                                                                                            | -0,67 | 0,05  |
| Cacna1a  | P97445   | EMGTDGYSDSEHYLPMEGQTR       | T(4): 24.9; Y(7): 24.9; S(8): 24.9; S(10): 24.9; Y(13): 0.3; T(20): 0.0                                | -0,68 | 0,27  |
| Fam21    | Q6PGL7   | LAAQESSEAEVDTVDR            | S(6): 50.0; S(7): 50.0; T(13): 0.0                                                                     | -0,68 | 0,15  |
| Pgk1     | P09411   | ALESPPERFLAILGGAK           | S(4): 100.0                                                                                            | -0,68 | 0,33  |
| Sparcl1  | P70663   | AAGSKEHIPHTEQQDQEGK         | S(4): 100.0; T(11): 0.0                                                                                | -0,68 | -0,05 |
| Sparcl1  | P70663   | GKESQEQPVSDSHQQPNESK        | S(4): 24.9; S(10): 24.9; S(12): 24.9; S(19): 24.9; S(20): 0.2                                          | -0,68 | 0,06  |
| Habp4    | Q9JKS5   | SLAASGAQQPDSPGGPQQPGQK      | S(1): 0.0; S(5): 0.0; S(12): 100.0                                                                     | -0,69 | 0,74  |
| Pabpc1l  | A2A5N3   | EVFSTYGVITSAK               | S(4): 0.0; T(5): 0.0; Y(6): 0.0; T(10): 100.0; S(11): 0.0                                              | -0,69 | 0,15  |
| Chgb     | P16014   | SSYEGHPLSEER                | S(1): 0.0; S(2): 0.0; Y(3): 0.0; S(9): 100.0                                                           | -0,69 | 0,62  |
| Tppp     | Q7TQD2   | RLSLESEGANEGATAAPELSALEEAFR | S(3): 99.6; S(6): 0.4; T(14): 0.0; S(20): 0.0                                                          | -0,69 | 0,16  |
| Ppm1g    | Q61074   | KLEEALSTEGAEDTGNSDK         | S(7): 50.0; T(8): 50.0; T(14): 0.0; S(17): 0.0                                                         | -0,69 | 0,59  |
| Lrrc16a  | F7AI27   | TASRPEDTPDPSGSPSSPK         | T(1): 0.0; S(3): 0.0; T(8): 0.0; S(11): 0.0; S(13): 0.0; S(16): 7.8; S(17): 92.2                       | -0,70 | 0,49  |
| Unc13a   | Q4KUS2   | ESYSDSMHSYEEFSEPR           | S(2): 0.0; Y(3): 0.0; S(4): 0.0; S(6): 0.0; S(9): 93.7; Y(10): 6.3; S(14): 0.0                         | -0,70 | 0,21  |
| Hn1      | P97825   | SNSSEASSGDFDLK              | S(1): 33.3; S(3): 33.3; S(4): 33.3; S(7): 0.0; S(8): 0.0                                               | -0,70 | 0,52  |
| Smaka    | Q9CPS8   | TPSPGEQQVQEVK               | T(1): 0.0; S(3): 100.0                                                                                 | -0,70 | 0,17  |
| Aak1     | Q3UHJ0-2 | VQTTTPPTIQGQK               | T(3): 0.0; T(4): 100.0; T(8): 0.0                                                                      | -0,70 | 0,27  |
| Ttyh3    | Q6P5F7   | ESPPPSYTSSMR                | S(2): 100.0; S(6): 0.0; Y(7): 0.0; T(8): 0.0; S(9): 0.0; S(10): 0.0                                    | -0,71 | 0,25  |
| Tcea1    | P10711   | EPAISSQNSPEAR               | S(5): 5.1; S(6): 47.5; S(9): 47.5                                                                      | -0,71 | 0,59  |
| Map1a    | Q9QYR6   | SHWDDGTNDSLEK               | S(1): 0.0; T(7): 0.0; S(10): 100.0                                                                     | -0,71 | 0,78  |
| Map1a    | Q9QYR6   | VPSAPGQESVPDTK              | S(3): 0.4; S(9): 99.6; T(14): 0.0                                                                      | -0,71 | 0,82  |
| Npnt     | D3YTX1   | VTGLHSGTLQVFRK              | T(2): 50.0; S(6): 50.0; T(8): 0.1                                                                      | -0,71 | 0,45  |
| Pex19    | Q8VCI5   | AKPSPEHAPTISAPDASGPQK       | S(4): 100.0; T(10): 0.0; S(12): 0.0; S(17): 0.0                                                        | -0,72 | 0,41  |
| Stxbp5   | D3Z2Q2   | RPVSVSPSSSQEISENQYAVICSEK   | S(4): 0.1; S(6): 0.5; S(8): 4.9; S(9): 47.0; S(10): 47.0; S(14): 0.5; S(23): 0.0                       | -0,72 | 0,71  |
| Map1a    | Q9QYR6   | SHWDDGTNDSLEK               | S(1): 0.0; T(7): 0.0; S(10): 100.0                                                                     | -0,72 | 0,28  |
| Aatk     | Q80YE4-4 | DDCSSLEQTPR                 | S(4): 0.4; S(5): 99.6; T(9): 0.0                                                                       | -0,72 | 0,09  |
| Basp1    | Q91XV3   | KAEGAGTEEGTPK               | T(7): 0.0; T(12): 100.0                                                                                | -0,73 | 0,36  |
| Pclo     | Q9QYX7   | ENPELVDDLSPR                | S(10): 100.0                                                                                           | -0,73 | 0,37  |
| Ncl      | P09405   | GLSEDTTEETLK                | S(3): 100.0; T(6): 0.0; T(7): 0.0; T(10): 0.0                                                          | -0,73 | -0,30 |
| Map1b    | P14873   | TPEEGGYSYEISEK              | T(1): 100.0; Y(7): 0.0; S(8): 0.0; Y(9): 0.0; S(12): 0.0                                               | -0,74 | 0,61  |
| Smap     | Q9R0P4   | SASPDGSSNWEAADLGNEER        | S(1): 6.1; S(3): 93.9; S(10): 0.0; S(11): 0.0                                                          | -0,74 | -0,05 |
| Dmtn     | Q9WV69   | DSSVPGSPSSIVAK              | S(2): 0.0; S(3): 0.0; S(7): 87.7; S(9): 6.1; S(10): 6.1                                                | -0,74 | 0,13  |
| Map1a    | Q9QYR6   | SPFEIISPPASPEMTGQR          | S(1): 0.0; S(7): 100.0; S(11): 0.0; T(16): 0.0                                                         | -0,74 | 0,02  |
| Tmem161a | M0QWV0   | YIHPSEEELR                  | Y(1): 50.0; S(5): 50.0                                                                                 | -0,74 | 0,46  |

|                                 |          |                                 |                                                                                                                        |       |       |
|---------------------------------|----------|---------------------------------|------------------------------------------------------------------------------------------------------------------------|-------|-------|
| Hnrnpa3                         | A2AL12   | SSGSPYGGGYGSGGGGGYGR            | S(1): 0.0; S(2): 0.1; S(4): 99.9; Y(6): 0.1; Y(10): 0.0; S(12): 0.0; S(16): 0.0; Y(19): 0.0; S(21): 0.0                | -0.74 | 0.19  |
| Rbbp8                           | Q80YR6   | MDVTVIDTK                       | T(4): 100.0; T(8): 0.0                                                                                                 | -0.75 | 0.47  |
| Tmem161a                        | M0QWV0   | YIHPSEEELR                      | Y(1): 50.0; S(5): 50.0                                                                                                 | -0.75 | 0.41  |
| D430041D05Rik                   | D3YZ21   | GHSETLSSQPSIDEVR                | S(3): 0.5; T(5): 97.7; S(6): 0.5; T(7): 0.5; S(9): 0.5; S(10): 0.5; S(13): 0.0                                         | -0.76 | 0.71  |
| Slc1a3                          | P56564   | DVEMGNSVIEENEMK                 | S(7): 100.0                                                                                                            | -0.76 | 0.34  |
| Grin2a                          | P35436   | QDSLNNQNPVSQR                   | S(3): 100.0; S(10): 0.0                                                                                                | -0.77 | 0.66  |
| Pacsin1                         | Q61644   | KAEGATLSNATGAVESTSQAGDRGSVSSYDR | T(6): 0.0; S(8): 0.0; T(11): 0.0; S(16): 2.9; T(17): 2.9; S(18): 2.9; S(25): 87.7; S(27): 2.9; S(28): 0.6; Y(29): 0.1  | -0.77 | 1.17  |
| Nefm                            | P08553   | QASHAQLGDAYDQEIR                | S(3): 100.0; Y(11): 0.0                                                                                                | -0.77 | 0.32  |
| Chgb                            | P16014   | EGVDDQESLRPSNQQASK              |                                                                                                                        | -0.77 | -0.26 |
| Fam169a                         | Q5XG69   | GHTEENLSPVSK                    |                                                                                                                        | -0.77 | 0.19  |
| Huwe1                           | Q7TMY8   | DLSMSEEDQMMR                    | S(3): 91.9; S(5): 8.1                                                                                                  | -0.77 | 0.74  |
| Clns1a                          | Q923F1   | LGEEESKEPLSDEEEDNDVPISEFR       | S(5): 50.0; S(10): 50.0; S(24): 0.0                                                                                    | -0.77 | 0.73  |
| Arhgap39                        | P59281-2 | AFSEDEALAQDQSK                  | S(3): 100.0; S(13): 0.0                                                                                                | -0.78 | 0.66  |
| Map2                            | P20357   | GSAQESLDTISPKNQHDEK             | S(2): 0.0; S(6): 0.3; T(9): 49.8; S(11): 49.8                                                                          | -0.78 | -0.09 |
| Nefn                            | P19246   | SPGEAKSPSEAK                    | S(1): 0.0; S(7): 99.6; S(9): 0.4                                                                                       | -0.78 | 0.02  |
| Map1a                           | Q9QYR6   | GEPVPAWEGKSPEQEVV               | S(11): 100.0                                                                                                           | -0.79 | 0.40  |
| Pcdh11x                         | B1AZR7   | GDSPHIEEHL                      | S(3): 100.0                                                                                                            | -0.79 | 0.14  |
| Rtn4                            | Q99P72   | LSASPQEVGKPYLESFQPNLHITK        | S(2): 0.0; S(4): 100.0; Y(12): 0.0; S(15): 0.0; T(23): 0.0                                                             | -0.80 | 0.75  |
| Pclo                            | Q9QYX7   | TSIGSSSSEYKQEDSQSGEDEFIR        | T(1): 0.0; S(2): 0.0; S(5): 0.0; S(6): 0.0; S(7): 0.0; S(8): 0.0; Y(11): 0.0; S(16): 0.7; S(19): 99.3                  | -0.80 | 0.44  |
| Fam21                           | Q6PGL7   | VSPEVGSADVASIAQK                | S(2): 100.0; S(7): 0.0; S(12): 0.0                                                                                     | -0.80 | 0.37  |
| Cep170b                         | Q80U49   | QESFTKEPTSGPPAPGK               | S(3): 93.6; T(5): 6.4; T(9): 0.0; S(10): 0.0                                                                           | -0.81 | 0.27  |
| Prrf2                           | E9PUL5   | ASPSPSPSEAR                     | S(2): 99.3; S(4): 0.1; S(6): 0.7; S(8): 0.0                                                                            | -0.81 | 0.50  |
| Reps2                           | A2AFI8   | APSQAEESSPTK                    | S(3): 0.0; S(8): 0.3; S(9): 99.7                                                                                       | -0.81 | 0.05  |
| Marcks1                         | P28667   | GDVTAEEAAGASPAK                 | T(4): 0.0; S(12): 100.0                                                                                                | -0.83 | 0.21  |
| Marcks1                         | P28667   | AAATPESQEPQAK                   | T(4): 50.0; S(7): 50.0                                                                                                 | -0.83 | 0.60  |
| UPF0690 protein C1orf52 homolog | Q9CWU4   | LLPEGEETVESDDDKDER              | T(8): 0.0; S(11): 100.0                                                                                                | -0.83 | 0.34  |
| Zdhhc5                          | Q8VDZ4   | GDSLKEPTSIADSSR                 |                                                                                                                        | -0.83 | 0.60  |
| Abcb5                           | B5X0E4   | FNTLVGEK                        | T(3): 100.0                                                                                                            | -0.84 | 0.48  |
| Mdc1                            | Q5PSV9   | VLLAADSEEEGDFPSGR               | S(7): 100.0; S(15): 0.0                                                                                                | -0.84 | 0.30  |
| Map1a                           | Q9QYR6   | AELEEMEEVHPSDEEEETKAESFYQK      | S(12): 33.3; T(19): 33.3; S(23): 33.3; Y(25): 0.2                                                                      | -0.84 | 0.27  |
| Caskin1                         | Q6P9K8-2 | AAASVVGPPVASDCASPGDSAR          | S(4): 0.0; S(7): 0.0; S(13): 2.5; S(17): 97.0; S(21): 0.4                                                              | -0.84 | 0.58  |
| Akap5                           | D3YVF0   | GPVAASPQK                       | S(6): 100.0                                                                                                            | -0.85 | 0.25  |
| Anp32a                          | O35381   | NRTPSDVK                        | T(3): 100.0; S(5): 0.0                                                                                                 | -0.85 | 0.50  |
| Akap12                          | Q9WTQ5-2 | CQETESNEEQSISPEKR               | T(4): 0.0; S(6): 0.6; S(11): 0.6; S(13): 98.8                                                                          | -0.85 | 0.52  |
| Dbnl                            | Q62418-3 | AMSTTSVTSSQPGK                  | S(3): 5.8; T(4): 87.9; T(5): 5.8; S(6): 0.4; T(8): 0.0; S(9): 0.0; S(10): 0.0                                          | -0.85 | 0.51  |
| Palmd                           | Q9JHU2   | RSNGPTHSTPTRPTQPR               | S(2): 0.0; T(6): 0.0; T(8): 50.0; S(9): 50.0; T(11): 0.0; T(14): 0.0                                                   | -0.85 | -0.07 |
| Basp1                           | Q91XV3   | KAEGAGTEEEGTPKESEPQAAADATEVK    | T(7): 0.3; T(12): 86.6; S(16): 13.1; T(25): 0.0                                                                        | -0.85 | 0.73  |
| Sfr1                            | Q8BP27-2 | ENPPSPPTSPAAPQPR                | S(5): 99.6; T(8): 0.4; S(9): 0.0                                                                                       | -0.85 | 0.57  |
| Kiaa1045                        | Q80TL4   | RGTVEGVSQEVQEEK                 | T(3): 100.0; S(7): 0.0                                                                                                 | -0.85 | 0.33  |
| Irs2                            | P81122   | ASSPAESSPEDSGYMR                | S(2): 1.0; S(3): 1.0; S(7): 48.9; S(8): 48.9; S(12): 0.0; Y(14): 0.0                                                   | -0.86 | 0.40  |
| Shank1                          | D3YZU5   | GSSTEDGPGVPPSPR                 | S(2): 13.5; S(3): 86.5; S(14): 0.0                                                                                     | -0.86 | 0.45  |
| Cntnap1                         | O54991   | DQNLQILEESRSE                   | S(11): 10.3; S(13): 89.7                                                                                               | -0.86 | 0.43  |
| Tmf1                            | B9EKI3   | SVSEINSDELPGK                   | S(1): 0.0; S(3): 0.1; S(7): 99.9                                                                                       | -0.86 | 0.17  |
| Ppp6r3                          | Q922D4-2 | IQQFDDGGSDEEDIWEEK              | S(9): 100.0                                                                                                            | -0.87 | 0.90  |
| Pacsin1                         | Q61644   | KAEGATLSNATGAVESTSQAGDRGSVSSYDR | T(6): 0.0; S(8): 0.0; T(11): 0.1; S(16): 78.2; T(17): 16.7; S(18): 3.8; S(25): 0.9; S(27): 0.2; S(28): 0.1; Y(29): 0.1 | -0.87 | 0.22  |
| Ppp1r9b                         | Q6R891   | ASSLNENVDSALLK                  | S(2): 0.4; S(3): 99.6; S(11): 0.0                                                                                      | -0.87 | 0.73  |
| Npy                             | P57774   | SSPETLISDLLMKESTENAPR           | S(1): 0.0; S(2): 0.0; T(5): 0.0; S(8): 0.0; S(15): 99.5; T(16): 0.5                                                    | -0.88 | 0.76  |
| Arfgef2                         | A2A5R2   | QSLSSADNLEPDVQGHQVAAR           | S(2): 8.7; S(4): 8.7; S(5): 82.5                                                                                       | -0.88 | 0.03  |



|          |          |                               |                                                                                                                   |       |       |
|----------|----------|-------------------------------|-------------------------------------------------------------------------------------------------------------------|-------|-------|
| Dbnl     | Q62418-3 | QLTQPETSYGR                   | T(3): 100.0; T(7): 0.0; S(8): 0.0; Y(9): 0.0                                                                      | -0.88 | 0.55  |
| Fbxl20   | Q9CZV8-4 | VHAYFAPVTPPPSVGGSR            | S(13): 99.1; S(17): 0.9                                                                                           | -0.88 | 0.66  |
| Efh2     | Q8C845   | ADLNQIGEPQSPSR                | S(12): 95.8; S(14): 4.2                                                                                           | -0.89 | 0.85  |
| Pak3     | Q61036-2 | IGQGASGTVYTALDIATGQEVAIK      | S(6): 0.0; T(8): 0.0; Y(10): 0.0; T(11): 0.0; T(17): 100.0                                                        | -0.90 | 0.29  |
| Ywhaz    | P63101   | TAFDEAIAELDTLSEESYK           | T(1): 0.0; T(12): 0.0; S(14): 100.0; S(17): 0.0; Y(18): 0.0                                                       | -0.90 | 0.12  |
| Map1a    | Q9QYR6   | APISLSQDPSPLNGSTTSCGPDR       | S(4): 0.0; S(6): 0.0; S(10): 100.0; S(16): 0.0; T(17): 0.0; T(18): 0.0; S(19): 0.0                                | -0.90 | 0.49  |
| Zswim8   | Q3UHH1-5 | RTFANGSADEFQR                 | T(2): 91.1; S(7): 8.9                                                                                             | -0.90 | 0.23  |
| Wfs1     | Q3UN10   | LNATASLEQDK                   | T(4): 6.4; S(6): 93.6                                                                                             | -0.90 | 0.18  |
| Rnf20    | Q5DTM8   | ALVVPEPEPDSDSNQR              | S(11): 6.2; S(13): 93.8                                                                                           | -0.91 | 0.04  |
| Fasn     | P19096   | TDSATDTTAPK                   | T(1): 0.1; S(3): 91.6; T(5): 7.5; T(7): 0.7; T(8): 0.1                                                            | -0.92 | 0.52  |
| Marcks   | P26645   | GEATAERPGEAAVASSPSK           | T(4): 0.0; S(15): 0.8; S(16): 98.3; S(18): 0.8                                                                    | -0.92 | 0.45  |
| Tom1     | O88746   | GLEFPMTDLDMLSPIHTPQR          | T(7): 0.0; S(13): 100.0; T(17): 0.0                                                                               | -0.92 | 0.34  |
| Atp2b1   | G5E829   | IEDSEPHIPLIDDTDAEDDAPTK       | S(4): 100.0; T(14): 0.0; T(22): 0.0                                                                               | -0.93 | 0.26  |
| Bcmo1    | E9Q321   | YLQSDTYIANIEANR               | Y(1): 0.0; S(4): 0.1; T(6): 7.2; Y(7): 92.8                                                                       | -0.93 | 0.73  |
| Sh3bp5l  | Q99LH9   | CDSVEHLR                      | S(3): 100.0                                                                                                       | -0.93 | 0.24  |
| Ranbp3   | Q9CT10   | SAGSSSPEAGEDSDHEDGNYPVVK      | S(1): 0.0; S(4): 0.0; S(5): 0.0; S(6): 0.0; S(13): 100.0; Y(20): 0.0                                              | -0.93 | 0.46  |
| Dnah7b   | L7N1Y0   | SSDEVVNEVAGDILSK              | S(1): 7.5; S(2): 92.5; S(15): 0.0                                                                                 | -0.94 | -0.22 |
| Bsn      | O88737   | DYLSDELNQLR                   | Y(2): 0.0; S(4): 99.9; S(6): 0.0                                                                                  | -0.94 | 0.54  |
| Slc7a14  | Q8BXR1   | ETCSPVSEGEFSSPATNTCGAK        | T(2): 33.3; S(4): 33.3; S(7): 33.3; S(13): 0.0; S(14): 0.0; T(17): 0.0; T(19): 0.0                                | -0.94 | 0.98  |
| Arhgap35 | Q91YM2   | NEEENIYVPHDSTQGK              | Y(7): 99.5; S(8): 0.5; S(13): 0.0; T(14): 0.0                                                                     | -0.94 | 0.21  |
| Sparcl1  | P70663   | AEKPSALNSEETHEQSTEQDK         | S(5): 33.1; S(9): 33.1; T(13): 33.1; S(17): 0.3; T(18): 0.3                                                       | -0.95 | 0.56  |
| Bsn      | O88737   | DACEPESGDPSTVR                | S(7): 100.0; S(12): 0.0; T(13): 0.0                                                                               | -0.95 | 0.44  |
| Clip2    | Q9Z0H8   | QASGPSSSGAATTVSEKPGPK         | S(3): 82.9; S(6): 8.5; S(7): 8.5; S(8): 0.1; T(12): 0.0; T(13): 0.0; S(15): 0.0                                   | -0.95 | 0.81  |
| Mical3   | Q8CJ19   | GTSQVSSPSQPPEK                | T(2): 0.0; S(3): 0.0; S(6): 0.4; S(7): 93.4; S(9): 6.2                                                            | -0.95 | 0.12  |
| Map4     | P27546   | DMSPSAETEAPLAK                | S(3): 50.0; S(5): 50.0; T(8): 0.0                                                                                 | -0.95 | 0.11  |
| Park2    | Q3UVA0   | NLTETLVGGSGGR                 | T(3): 1.4; T(5): 97.3; S(10): 1.4                                                                                 | -0.96 | 0.38  |
| Caskin1  | Q6P9K8-2 | RGSGEPAEQSHFMEDGTAR           | S(3): 100.0; S(10): 0.0; T(17): 0.0                                                                               | -0.96 | 0.17  |
| Ptges3   | Q9R0Q7   | DWEDDSDEDMSNFDR               | S(6): 100.0; S(11): 0.0                                                                                           | -0.98 | 0.55  |
| Map1a    | Q9QYR6   | SEPQDFQEDSWGDTK               | S(1): 0.0; S(10): 5.4; T(14): 94.6                                                                                | -0.98 | 0.56  |
| Lmtk2    | Q3TYD6   | GQSPPEVPEESSDVR               | S(3): 100.0; S(7): 0.0; S(13): 0.0; S(14): 0.0                                                                    | -0.99 | 0.32  |
| Map1a    | Q9QYR6   | TEATQGLDYVPSAGTISPTSSLEEDKGFK | T(1): 0.0; T(4): 0.0; Y(9): 0.0; S(12): 0.0; T(15): 0.2; S(17): 24.9; T(19): 24.9; S(20): 24.9; S(21): 24.9       | -0.99 | 0.89  |
| Map1b    | P14873   | ASLSPMDEPVPDSESPVEK           | S(2): 0.0; S(4): 0.0; S(13): 0.0; S(15): 100.0                                                                    | -1.00 | 0.29  |
| Apba1    | B2RUJ5   | MDSYEQEEDIDQIVAEVK            | S(3): 50.0; Y(4): 50.0                                                                                            | -1.01 | 1.13  |
| Arpp21   | E9Q4A0   | TGSESSSAGSSGSLSR              | T(1): 1.0; S(3): 97.9; S(5): 1.0; S(6): 0.1; S(7): 0.0; S(8): 0.0; S(11): 0.0; S(12): 0.0; S(14): 0.0; S(16): 0.0 | -1.02 | 1.03  |
| Pp2d1    | Q8BVT6   | ECIISNLLR                     | S(5): 100.0                                                                                                       | -1.02 | 0.91  |
| Myo18a   | B2RRE2   | EPADLDPEAASPAYSQAK            | S(11): 100.0; Y(14): 0.0; S(15): 0.0                                                                              | -1.03 | 0.39  |
| Chgb     | P16014   | ADEFDPFDYDSEEQMGPHQEANDEK     | Y(8): 1.0; S(10): 99.0                                                                                            | -1.03 | 0.47  |
| Basp1    | Q91XV3   | ETPAASEAPSSAAK                | T(2): 0.0; S(6): 0.0; S(10): 5.8; S(11): 94.2                                                                     | -1.05 | 0.68  |
| Syn1     | O88935   | QASISGPAPTK                   | S(3): 100.0; S(5): 0.0; T(10): 0.0                                                                                | -1.05 | 0.85  |
| Arpp21   | E9Q4A0   | SESLDEEEKLELQR                | S(1): 0.0; S(3): 100.0                                                                                            | -1.05 | 0.68  |
| Chgb     | P16014   | WWQEEQLGPEESREEVR             | S(13): 100.0                                                                                                      | -1.06 | 0.48  |
| Me1      | P06801   | LFYSVLMSDVEK                  | Y(3): 47.9; S(4): 47.9; S(8): 4.3                                                                                 | -1.09 | 0.45  |
| Bsn      | O88737   | EPELEMESLTGSPEDR              | S(8): 0.0; T(10): 93.4; S(12): 6.5                                                                                | -1.09 | 0.05  |
| Rapgef2  | E9QNQ4   | SLGSLSQGSANATVLDVAQTGGHK      | S(1): 91.1; S(4): 8.9; S(6): 0.0; S(9): 0.0                                                                       | -1.10 | 1.18  |
| Tmem44   | E9Q4M0   | RASLSPVDLASSD                 | S(3): 96.4; S(5): 3.6; S(11): 0.0                                                                                 | -1.11 | 0.89  |
| Pan3     | Q640Q5   | SVLVVYSDLK                    | S(1): 0.0; S(8): 100.0                                                                                            | -1.12 | 0.60  |
| Stxbp1   | O08599-2 | ESSRVFEDQAPTME                | S(2): 0.0; S(3): 0.0; S(6): 100.0; T(13): 0.0                                                                     | -1.12 | 0.78  |
| Srr      | Q9QZX7-2 | GLIPDTPEEKPK                  | T(6): 100.0                                                                                                       | -1.15 | 0.00  |

|          |          |                                     |                                                                                                                       |       |      |
|----------|----------|-------------------------------------|-----------------------------------------------------------------------------------------------------------------------|-------|------|
| Chgb     | P16014   | ESKEADVATVR                         | S(2): 100.0; T(9): 0.0                                                                                                | -1,18 | 0,45 |
| Cplx1    | P63040   | EAEAQAAMEANSEGLTRPK                 | S(12): 0.8; S(15): 98.3; T(17): 0.8                                                                                   | -1,21 | 0,79 |
| Npy      | P57774   | SSPETLISDLLMKESTENAPR               | S(1): 0.0; S(2): 0.0; T(5): 0.0; S(8): 0.0; S(15): 99.3; T(16): 0.7                                                   | -1,21 | 1,10 |
| Tnrc6c   | Q3UHC0   | DSSEATGWEEPPSPSIR                   | S(2): 0.0; S(3): 0.0; T(6): 0.0; S(12): 99.9; S(15): 0.1                                                              | -1,23 | 0,82 |
| Mccc2    | Q3ULD5   | AYHGDSVARLGTQPDSSASTYQENYEQMK       | S(6): 0.0; S(16): 9.7; S(18): 45.1; S(19): 45.1                                                                       | -1,27 | 0,70 |
| Scg2     | Q03517   | RVPSPVSSDDLQEEEQLEQAIK              | S(4): 0.0; S(7): 99.5; S(8): 0.5                                                                                      | -1,28 | 0,62 |
| Prkcb    | P68404-2 | NIDQSEFEGFSFNSEFLKPEVK              | S(5): 0.5; S(11): 49.8; S(15): 49.8                                                                                   | -1,31 | 0,23 |
| Dgkg     | Q91WG7   | EIEQSPLVMLDR                        | S(5): 100.0                                                                                                           | -1,35 | 0,08 |
| Cttn     | Q60598   | QTPPASPPQPIEDRPPSSPIYEDAAPFK        | T(2): 0.0; S(6): 0.0; S(8): 0.0; S(18): 88.9; S(19): 9.9; Y(22): 1.2                                                  | -1,38 | 0,98 |
| Col3a1   | P08121   | GFPGNPGPPGSPGAAGHQGAIGSPGPAGPR      | S(11): 50.0; S(23): 50.0                                                                                              | -1,52 | 0,06 |
| Arhgef11 | Q68FM7   | TCEGRLSVDSQEADSGLDGTER              | T(1): 0.6; S(7): 96.5; S(10): 3.0; S(15): 0.0; S(19): 0.0; T(21): 0.0                                                 | -1,52 | 0,50 |
| Hsp90aa1 | P07901   | ESDDKPEIEDVGSDEEEEEK                | S(2): 0.0; S(13): 100.0                                                                                               | -1,53 | 0,99 |
| Map2     | P20357   | LASVSADAEVAR                        | S(3): 100.0; S(5): 0.0                                                                                                | -1,56 | 0,77 |
| Trim28   | Q62318   | RPAASSAAAASAAASSPAGGGGEAQELLEHCGVCR | S(5): 0.0; S(6): 0.0; S(11): 0.0; S(15): 50.0; S(16): 50.0                                                            | -1,66 | 0,54 |
| Slc12a5  | Q91V14   | ETDPEVHLTWTK                        | T(2): 0.0; T(9): 99.6; T(11): 0.4                                                                                     | -1,67 | 1,01 |
| Smarcc2  | Q3UID0   | DMDEPSPVNVVEEVTLPK                  | S(6): 100.0; T(15): 0.0                                                                                               | -1,79 | 2,05 |
| Camkv    | Q3UHL1   | SATPATDGRATPATEESTVPATQSSALPAAK     | S(1): 0.0; T(3): 0.0; T(6): 0.0; T(11): 98.3; T(14): 1.7; S(17): 0.0; T(18): 0.0; T(22): 0.0; S(24): 0.0; S(25): 0.0  | -1,81 | 1,54 |
| Tsc22d2  | E9Q7M2   | TEDVSSEIFDVSR                       | T(1): 0.0; S(5): 50.0; S(6): 50.0; S(12): 0.0                                                                         | -1,91 | 1,05 |
| Camkv    | Q3UHL1   | SATPATDGRATPATEESTVPATQSSALPAAK     | S(1): 2.4; T(3): 2.4; T(6): 2.4; T(11): 44.8; T(14): 44.8; S(17): 2.4; T(18): 0.6; T(22): 0.0; S(24): 0.0; S(25): 0.0 | -1,97 | 1,17 |
| Camkv    | Q3UHL1   | ATPATEESTVPATQSSALPAAK              | T(2): 98.0; T(5): 1.9; S(8): 0.1; T(9): 0.1; T(13): 0.0; S(15): 0.0; S(16): 0.0                                       | -2,18 | 1,91 |

**Supplementary Table S5. Proteins up and down phosphorylated in the cortex of Ts65Dn mice and reverted by L41 treatment.**

| Gene name | Protein Group Accessions | Sequence                          | phosphoRS Site Probabilities                                                                                                                                                                                                        | Ts65Dn vs WT | Ts65Dn +/-L41 |
|-----------|--------------------------|-----------------------------------|-------------------------------------------------------------------------------------------------------------------------------------------------------------------------------------------------------------------------------------|--------------|---------------|
| Lppr4     | Q7TME0                   | QTYELNDLNR                        | T(2): 50.0; Y(3): 50.0                                                                                                                                                                                                              | 5.46         | -6.56         |
| Khdrbs1   | Q60604-2                 | ASQVAIGIRDNER                     | S(2): 100.0                                                                                                                                                                                                                         | 4.82         | -3.08         |
| Napa      | Q9DAV8                   | NYQFLAIFNLHCLR                    | Y(2): 100.0; S(11): 0.0                                                                                                                                                                                                             | 3.44         | -3.06         |
| Akap12    | Q9WTP7                   | VYNIEFNPPK                        | Y(2): 100.0                                                                                                                                                                                                                         | 2.88         | -1.42         |
| Arhgap39  | P59281-2                 | EDTSSCSPPGVLEK                    | T(3): 33.3; S(4): 33.3; S(5): 33.3; S(7): 0.0                                                                                                                                                                                       | 2.52         | -2.93         |
| Kif5b     | Q61738-4                 | GANVQKESK                         | S(8): 100.0                                                                                                                                                                                                                         | 2.20         | -2.11         |
| Sipa111   | Q8C0T5                   | QDPVVHLSPNK                       | S(8): 100.0                                                                                                                                                                                                                         | 2.16         | -2.31         |
| Dhx16     | Q04690-2                 | SSSGLATYSPPMGAVSER                | S(1): 0.0; S(2): 0.0; S(3): 0.0; T(7): 0.0; Y(8): 6.8; S(9): 93.2; S(16): 0.0                                                                                                                                                       | 2.15         | -1.77         |
| Mark1     | Q8VHG2                   | DTTVISHPNTSYDTALEAR               | T(2): 0.0; T(3): 0.0; S(6): 0.0; S(8): 100.0; T(11): 0.0; S(12): 0.0; Y(13): 0.0; T(15): 0.0                                                                                                                                        | 1.65         | -1.70         |
| Asap1     | H3BL41                   | GVFPVSFVHILSD                     | S(6): 0.0; S(12): 100.0                                                                                                                                                                                                             | 1.58         | -1.07         |
| Pgm3      | Q9CXF4                   | DDSPTQLASPNACR                    | S(3): 99.6; T(5): 0.4; T(7): 0.0; S(10): 0.0                                                                                                                                                                                        | 1.53         | -1.40         |
| Osbp      | Q2WF71                   | STPHLDGAGGGAAGEDGLGLGSAR          | S(1): 50.0; T(2): 50.0; S(23): 0.0                                                                                                                                                                                                  | 1.51         | -1.52         |
| Bsn       | O88737                   | GEHSSLTPASTPSYTSPTSLSLSEEDSDSSPSR | S(4): 0.0; S(5): 0.0; T(6): 0.0; S(10): 0.0; T(11): 0.0; S(13): 0.0; Y(14): 0.0; T(15): 0.0; S(16): 0.0; T(18): 0.1; S(19): 0.1; T(21): 0.3; S(22): 0.8; S(24): 0.8; S(25): 0.8; S(30): 15.7; S(32): 15.7; S(33): 15.7; S(35): 49.9 | 1.51         | -1.24         |
| Tsc1      | Q9DCS2                   | ISPQSNVDFDLTLR                    | S(2): 90.5; S(5): 9.5; T(12): 0.0                                                                                                                                                                                                   | 1.39         | -1.79         |
| Ehd3      | Q9QXY6                   | DKPMYDEIFYTLSPVDGK                | Y(5): 0.0; Y(10): 0.1; T(11): 8.1; S(13): 91.9                                                                                                                                                                                      | 1.38         | -1.10         |
| Agap2     | Q3UHD9                   | AISAFGPSASINGLVK                  | S(3): 0.0; S(8): 50.0; S(10): 50.0                                                                                                                                                                                                  | 1.38         | -0.04         |
| Sin3a     | Q5XJV6                   | AQRPEGMSPELPPR                    | S(9): 100.0                                                                                                                                                                                                                         | 1.38         | -1.52         |
| Phkb      | Q7TQH0-2                 | EVDGLLTSDPMGSPVSSK                | T(7): 0.0; S(8): 0.0; S(13): 99.8; S(16): 0.2; S(17): 0.0                                                                                                                                                                           | 1.35         | -0.93         |
| Sgip1     | Q8VCY8-2                 | LSPWEDLSQAPTMDSPLEK               | S(2): 0.0; S(8): 0.0; T(12): 0.4; S(15): 99.6                                                                                                                                                                                       | 1.34         | -1.54         |
| Ptpn23    | Q6PAR5-6                 | RPGNEELPPAAATGATSLVAAPHSSSSSSPSK  | T(13): 0.0; T(16): 0.0; S(17): 0.1; S(24): 26.5; S(25): 6.8; S(26): 6.8; S(27): 26.5; S(28): 26.5; S(30): 6.8                                                                                                                       | 1.33         | -0.26         |
| Lamtor1   | Q99PV8-2                 | ELAGNSSTPPPVPSPGR                 | S(6): 0.1; S(7): 0.0; T(8): 0.0; S(13): 99.9                                                                                                                                                                                        | 1.29         | -0.63         |
| Map1b     | P14873                   | TPEEGGYSYEISEK                    | T(1): 100.0; Y(7): 0.0; S(8): 0.0; Y(9): 0.0; S(12): 0.0                                                                                                                                                                            | 1.27         | -1.03         |
| Grin2b    | G3X9V4                   | RQHSYDTFVDLQK                     | S(4): 99.6; Y(5): 0.4; T(7): 0.0                                                                                                                                                                                                    | 1.26         | -1.39         |
| Rab11fip2 | G3XA57                   | SGTNDTYTIQLGK                     | S(1): 0.1; T(3): 8.3; T(6): 83.2; Y(7): 8.3; T(8): 0.1                                                                                                                                                                              | 1.18         | -0.90         |
| Arhgap21  | B7ZCJ1                   | DQGEVPSSEDEPFSWPGPK               | S(7): 91.8; S(9): 8.2; S(15): 0.0                                                                                                                                                                                                   | 1.16         | -1.15         |
| Bod1l     | E9Q6J5                   | GSDVVLVSGEVPCEVGHMSPR             | S(2): 0.0; S(8): 0.0; S(20): 100.0                                                                                                                                                                                                  | 1.15         | -0.65         |
| Gsk3b     | Q9WV34                   | TYETPPSPGLDPTFSNQVPPDAVR          | T(1): 49.8; Y(2): 49.8; T(4): 0.5; S(8): 0.0; T(14): 0.0; S(16): 0.0                                                                                                                                                                | 1.10         | 0.00          |
| Sec22b    | O08547                   | NLGSINTELQDVQR                    | S(4): 93.0; T(7): 7.0                                                                                                                                                                                                               | 1.10         | -0.76         |
| Ppp1r1b   | Q60829                   | RPNPCAYTPPSLK                     | Y(7): 0.0; T(8): 100.0; S(11): 0.0                                                                                                                                                                                                  | 1.04         | -1.14         |
| Usp45     | E9Q4D8                   | ISLSSAPQLEPLVLELSSPGPLTSALFL      | S(2): 69.4; S(4): 15.3; S(5): 15.3; S(17): 0.0; S(18): 0.0; T(23): 0.0; S(24): 0.0                                                                                                                                                  | 1.04         | 0.07          |
| Palmd     | Q9JHU2                   | SNGPHTSPTRPTPQPR                  | S(1): 0.0; T(5): 0.6; T(7): 0.6; S(8): 98.7; T(10): 0.0; T(13): 0.0                                                                                                                                                                 | 1.00         | -1.26         |
| Rps3      | P62908                   | DEILPTTPISEQK                     | T(6): 4.8; T(7): 95.2; S(10): 0.0                                                                                                                                                                                                   | 0.98         | -0.57         |
| Exo1      | Q9QZ06                   | LGYAVYETPTAHNGAK                  | Y(3): 0.0; Y(6): 99.3; T(8): 0.7; T(10): 0.0                                                                                                                                                                                        | 0.98         | -1.17         |
| Avl9      | Q80U56                   | DSLPSDSPITVQPQANNR                | S(2): 0.0; S(5): 0.7; S(7): 99.3; T(11): 0.0                                                                                                                                                                                        | 0.97         | -0.44         |
| Chgb      | P16014                   | EGVDDQESLRPSNQQASK                | S(8): 0.3; S(12): 11.8; S(17): 88.0                                                                                                                                                                                                 | 0.97         | -0.53         |
| Kcna2     | P63141                   | ETEGEEQAQYLQVTSCPK                | T(2): 0.0; Y(10): 0.0; T(14): 0.0; S(15): 100.0                                                                                                                                                                                     | 0.97         | -0.48         |
| Psd       | Q5DP50                   | MGSQSLNSTFLK                      | S(3): 0.1; S(5): 7.9; S(8): 91.2; T(9): 0.8                                                                                                                                                                                         | 0.96         | -0.90         |
| Abcc1     | O35379                   | GSSQLDVNEEVEALIVK                 | S(2): 50.0; S(3): 50.0                                                                                                                                                                                                              | 0.94         | -0.26         |
| Setd1a    | E9PYH6                   | SGSPAPETTNEVPFAQHSSSLDSR          | S(1): 0.6; S(3): 99.3; T(8): 0.0; T(9): 0.0; S(12): 0.0; S(19): 0.0; S(20): 0.0; S(23): 0.0                                                                                                                                         | 0.91         | -0.79         |
| Nup210l   | Q9D219                   | SSTPSHGQTPAPEPISAQK               | S(1): 1.2; S(2): 1.2; T(3): 95.4; S(5): 1.2; T(9): 1.2; S(16): 0.0                                                                                                                                                                  | 0.91         | -0.45         |
| Ppp1r1b   | Q60823                   | YFDFEFTAQSITIPDDR                 | Y(1): 0.0; T(7): 0.0; S(10): 0.0; T(12): 0.2; T(14): 99.8                                                                                                                                                                           | 0.90         | -0.06         |
| Begain    | F8WIG2                   | RPSVDTPVTDVGLFR                   | S(3): 6.4; T(6): 93.6; T(9): 0.0                                                                                                                                                                                                    | 0.88         | -0.15         |

|                                          |          |                                 |                                                                                                                      |      |       |
|------------------------------------------|----------|---------------------------------|----------------------------------------------------------------------------------------------------------------------|------|-------|
| Pde1b                                    | Q01065   | SPPEMLESDCPSPLELK               | S(1): 100.0; S(8): 0.0; S(12): 0.0                                                                                   | 0.87 | -0.53 |
| Uncharacterized protein C15orf39 homolog | Q3TEI4   | GAAYQAGGLGSPYLR                 | Y(4): 83.6; S(11): 13.8; Y(13): 2.6                                                                                  | 0.86 | -1.65 |
| Ywhaz                                    | P63101   | TAFDEAIAELDTLSEESYK             | T(1): 0.0; T(12): 0.0; S(14): 100.0; S(17): 0.0; Y(18): 0.0                                                          | 0.86 | -1.02 |
| Ctps1                                    | P70698   | SGSSSPDSEITELK                  | S(1): 0.0; S(3): 0.0; S(4): 0.0; S(5): 0.2; S(8): 99.8; T(11): 0.0                                                   | 0.85 | -0.11 |
| Wrnip1                                   | Q91XQ0-2 | NSDILSSTEGK                     | S(2): 0.0; S(6): 9.1; S(7): 1.0; T(8): 89.8                                                                          | 0.85 | -0.84 |
| Lpin2                                    | Q99P72   | ESAEFSVLEYSEMGSFNGSPK           | S(2): 0.0; S(6): 0.0; Y(10): 0.0; S(11): 0.0; S(15): 0.0; S(16): 6.7; S(20): 93.3                                    | 0.85 | -1.05 |
| Camk2d                                   | E9Q1T1   | ENFSGGTSLWQNI                   | S(4): 88.3; T(7): 5.8; S(8): 5.8                                                                                     | 0.84 | -0.14 |
| Prkab2                                   | Q6PAM0   | DLSSSPPGPYQEMYVFR               | S(3): 0.0; S(4): 0.0; S(5): 100.0; Y(10): 0.0; Y(15): 0.0                                                            | 0.83 | -0.92 |
| Tbc1d15                                  | Q9CXF4   | DDSPTQLTASPACR                  | S(3): 92.4; T(5): 7.5; T(7): 0.1; S(10): 0.0                                                                         | 0.82 | -0.79 |
| Eml2                                     | E9QK48   | VGGYATSPSSPK                    | Y(4): 0.0; T(6): 0.3; S(7): 33.2; S(9): 33.2; S(10): 33.2                                                            | 0.81 | -0.76 |
| Epn1                                     | Q80V94   | IIEQPECSSPIETER                 | S(8): 50.0; S(9): 50.0; T(14): 0.0                                                                                   | 0.81 | -0.44 |
| Map1a                                    | Q9QYR6-2 | VAELEEQSQGSSSYSDWVK             | S(9): 100.0; S(12): 0.0; S(13): 0.0; S(14): 0.0; Y(15): 0.0; S(16): 0.0                                              | 0.81 | -0.36 |
| Usp10                                    | P52479-2 | TCDSPQNPVDFISGVPDSPFPR          | T(1): 11.1; S(4): 88.9; S(13): 0.0; S(19): 0.0                                                                       | 0.80 | 0.04  |
| Kcnd1                                    | Q03717   | STSSLPEPMEIVR                   | S(1): 0.0; T(2): 0.2; S(3): 9.9; S(4): 90.0                                                                          | 0.74 | -0.34 |
| Gng3                                     | P63216   | GETPVNSTMSIGQAR                 | T(3): 0.0; S(7): 0.1; T(8): 0.1; S(10): 99.9                                                                         | 0.71 | -0.83 |
| Tppp                                     | Q7TQ95   | ADSVPNLEPSEESLVTK               | S(3): 100.0; S(10): 0.0; S(13): 0.0; T(16): 0.0                                                                      | 0.71 | -0.42 |
| Lmtk3                                    | Q5XJV6   | ALVNGEPMSPAGEK                  | S(9): 100.0                                                                                                          | 0.70 | -0.64 |
| Usp5                                     | Q3U3J1   | IGHHSTDDSSAYR                   | S(5): 100.0; T(6): 0.0; S(7): 0.0; S(10): 0.0; S(11): 0.0; Y(13): 0.0                                                | 0.70 | -0.39 |
| Argef1                                   | G3X9K3   | VETEKQSPHGAEK                   | T(3): 0.4; S(7): 99.6                                                                                                | 0.69 | -0.43 |
| HnrnpC                                   | Q9Z1P7   | SEGALQVLDPGSRTPDGEPR            | S(1): 0.0; S(12): 99.4; T(14): 0.6                                                                                   | 0.69 | -0.64 |
| Comt                                     | O88587-2 | AVYQGGSSPVK                     | Y(3): 0.0; S(8): 50.0; S(9): 50.0                                                                                    | 0.68 | 0.24  |
| Arhgef2                                  | H3BJU7   | SVSTTNIAGHFNDESPLGLR            | S(1): 0.0; S(3): 0.0; T(4): 0.0; T(5): 0.0; S(15): 100.0                                                             | 0.68 | -0.85 |
| Grin2a                                   | P35436   | GSLIVDMVSDK                     | S(2): 100.0; S(9): 0.0                                                                                               | 0.68 | -0.80 |
| Gm15800                                  | E9Q2E4   | SMSAPSDLEMIGNEDLEFTR            | S(1): 47.3; S(3): 47.3; S(6): 5.4; T(19): 0.0                                                                        | 0.67 | -0.87 |
| Klc2                                     | D3YXZ3   | VDSPTVNTTLR                     | S(3): 100.0; T(5): 0.0; T(8): 0.0; T(9): 0.0                                                                         | 0.67 | -0.40 |
| Yap1                                     | P46938-2 | GDSETDLEALFNAVMNPK              | S(3): 50.0; T(5): 50.0                                                                                               | 0.67 | -0.41 |
| Gripap1                                  | A2AEW8   | TGLEELVLSEMNSPSR                | T(1): 0.0; S(9): 0.0; S(13): 50.0; S(15): 50.0                                                                       | 0.66 | -0.98 |
| Kif17                                    | A2AM72   | EYQEEIK                         | Y(2): 100.0                                                                                                          | 0.65 | -0.51 |
| Apc                                      | B2RUG9   | SPTGNTPPVIDSVSEK                | S(1): 99.9; T(3): 0.1; T(6): 0.0; S(12): 0.0; S(14): 0.0                                                             | 0.64 | -0.29 |
| Pkdrej                                   | F8VQF3   | YSRFFYNVRLAQK                   | Y(1): 100.0; S(2): 0.0; Y(6): 0.0                                                                                    | 0.64 | -0.53 |
| Aldoc                                    | P05063   | GILAADES VGSMK                  | S(8): 100.0; S(11): 0.0                                                                                              | 0.64 | -0.48 |
| Rtn1                                     | Q8K0T0   | GSVSEDELI AAIK                  | S(2): 3.4; S(4): 96.6                                                                                                | 0.64 | -0.72 |
| Add2                                     | Q9QY81   | ELASPLALTPR                     | S(4): 0.8; T(9): 99.2                                                                                                | 0.64 | 0.36  |
| Pdpk1                                    | F2Z3X6   | ANSFVGT AQYVSPPELLTEK           | S(3): 99.7; T(7): 0.3; Y(10): 0.0; S(12): 0.0; T(17): 0.0                                                            | 0.64 | -0.93 |
| Slc43a2                                  | Q8CFT2-2 | ISSPSSSSSDK                     | S(2): 48.9; S(3): 48.9; S(5): 1.3; S(6): 0.1; S(7): 0.1; S(8): 0.3; S(9): 0.3; S(10): 0.3                            | 0.63 | -0.43 |
| Chga                                     | P26339   | GELEHSQQEEDGEEAMVGT PQGLFPQGGK  | S(6): 100.0; T(19): 0.0                                                                                              | 0.62 | -0.36 |
| Map1b                                    | P14873   | TTRSPDTSAYCYETMEK               | T(1): 0.0; T(2): 6.8; S(4): 93.1; T(7): 0.0; S(8): 0.0; Y(10): 0.0; Y(12): 0.0; T(14): 0.0                           | 0.61 | -0.65 |
| Map1a                                    | Q9QYR6-2 | ELSSAVSPPNLHSDTPTFSYASLAGPTIPPR | S(3): 0.0; S(4): 0.8; S(7): 99.2; S(13): 0.0; T(15): 0.0; T(17): 0.0; S(19): 0.0; Y(20): 0.0; S(22): 0.0; T(27): 0.0 | 0.61 | -0.29 |
| Arhgef7                                  | Q9ES00   | LAGGQTSQPTTPTLSPQR              | T(6): 0.0; S(7): 0.0; T(10): 0.0; T(11): 0.0; T(14): 9.5; S(15): 90.5                                                | 0.61 | 0.22  |
| Xrn2                                     | Q9DB05   | AIDIYEQVGT SAMDSPLLK            | Y(5): 0.0; T(10): 0.0; S(11): 0.0; S(15): 100.0                                                                      | 0.60 | -1.65 |
| Atp4a                                    | Q91WG5   | SSSKESPNSNPSTSPGGIR             | S(1): 0.4; S(2): 49.3; S(3): 49.3; S(6): 0.4; S(7): 0.4; S(10): 0.0; S(13): 0.0; T(14): 0.0; S(15): 0.0              | 0.59 | -0.98 |
| Yap1                                     | P46938-2 | QSSFEPD VPLPAGWEMAK             | S(2): 0.5; S(3): 99.5                                                                                                | 0.59 | 0.30  |
| Kif2a                                    | E0CZ72   | ARPSQLPEQSSSAQNGSVSDISPVQAAK    | S(4): 0.0; S(10): 0.0; S(11): 0.0; S(12): 0.0; S(18): 0.0; S(20): 0.0; S(23): 100.0                                  | 0.59 | -0.28 |
| Cacna1e                                  | Q61206   | ELFSPHLALNFGIGDTR               | S(4): 100.0; T(17): 0.0; T(18): 0.0                                                                                  | 0.59 | -0.54 |
| Gprin1                                   | Q3UNH4   | AETVSPGEVDAMTLGK                | T(3): 7.0; S(5): 93.0; T(13): 0.0                                                                                    | 0.58 | -0.62 |

|          |          |                                  |                                                                                                                        |       |       |
|----------|----------|----------------------------------|------------------------------------------------------------------------------------------------------------------------|-------|-------|
| Gbf1     | Q69ZX8   | TSETISPPGSSIGSPNR                | T(1): 0.0; S(2): 0.0; T(4): 0.0; S(5): 0.0; S(7): 100.0; S(11): 0.0; S(12): 0.0; S(15): 0.0                            | 0.57  | -0.14 |
| Ap2a1    | P17426-2 | RDTSSNDINGGVEPTSTVSTSPSADLLGLR   | T(3): 0.0; S(4): 0.0; S(5): 0.0; T(15): 0.0; S(17): 0.0; T(18): 0.0; S(20): 0.6; T(21): 0.6; S(23): 98.3; S(25): 0.6   | 0.56  | 0.15  |
| Otud7a   | Q8R554   | AAPGTGGPTPGRSPAPAR               | T(5): 0.0; T(9): 0.0; S(13): 100.0                                                                                     | 0.55  | 0.00  |
| Pclo     | Q9QYX7   | KIVDSGVQTDDEETADR                | S(5): 0.1; T(9): 99.9; T(14): 0.0                                                                                      | 0.55  | 0.03  |
| Ankrd63  | A2ARS0   | GSNSDSPGHPAPAPSPER               | S(2): 33.3; S(4): 33.3; S(6): 33.3; S(16): 0.0                                                                         | 0.55  | -0.35 |
| Ppp1r9b  | Q6R5C6   | NQALEMSLR                        | S(8): 100.0                                                                                                            | 0.55  | 0.44  |
| Prkcb    | P68404-2 | NIDQSEFEGFSVNSEFLKPEVK           | S(5): 0.0; S(11): 50.0; S(15): 50.0                                                                                    | 0.54  | -0.23 |
| Rims1    | Q99NE5-5 | SASTNCLRPDTSLSHSPER              | S(1): 0.0; S(3): 0.0; T(4): 0.0; T(11): 0.0; S(12): 0.0; S(15): 100.0                                                  | 0.53  | -0.47 |
| Bora     | Q8BRF7   | VNLEESTGVENSPAGARPK              | S(6): 0.0; T(7): 0.0; S(12): 100.0                                                                                     | 0.53  | -0.27 |
| Aak1     | Q3UJH0-2 | REQGSSGLGSGSSGGSSGLGSGYIGR       | S(5): 0.0; S(6): 0.0; S(10): 0.1; S(12): 13.4; S(13): 86.5; S(18): 0.0; S(19): 0.0; S(20): 0.0; S(24): 0.0; Y(26): 0.0 | 0.52  | -0.20 |
| Sfr1     | Q8BP27-2 | ENPPSPPTSPAAPQPR                 | S(5): 100.0; T(8): 0.0; S(9): 0.0                                                                                      | 0.52  | -0.60 |
| Phyhipl  | Q8BGR1   | HRTVLAEEFK                       | T(3): 100.0                                                                                                            | 0.52  | -0.20 |
| Rtn4     | Q99P31   | LLQTCFSSPTDDSDMR                 | T(4): 0.0; S(7): 49.9; S(8): 49.9; T(10): 0.2; S(13): 0.0                                                              | 0.52  | -0.29 |
| Ankrd34a | B2RW11   | APSLPAPPPGAPGSPR                 | S(3): 0.0; S(10): 0.0; S(15): 100.0                                                                                    | 0.51  | -0.57 |
| Gm15800  | E9Q2E4   | TEGTPPPGQPAK                     | T(1): 0.0; T(4): 100.0                                                                                                 | 0.51  | -0.58 |
| Map1b    | P14873   | DYNASASTISPPSSMEEDK              | Y(2): 0.0; S(5): 0.0; S(7): 0.2; T(8): 1.2; S(10): 87.6; S(13): 9.9; S(14): 1.2                                        | 0.51  | 0.03  |
| Dchs1    | F6TP58   | ITFNLLAGGDGLFTVDPTTGHVR          | T(2): 0.1; T(14): 43.8; T(18): 12.3; T(19): 43.8                                                                       | 0.51  | -0.19 |
| Foxk1    | P42128   | SAPASPTHPLMSPR                   | S(1): 0.0; S(5): 100.0; T(7): 0.0; S(13): 0.0                                                                          | 0.51  | -0.20 |
| Trappc8  | E9PWG2   | NSDSNLLSLDGLDNEVK                | S(2): 50.0; S(4): 50.0; S(8): 0.1                                                                                      | 0.50  | -0.58 |
| Dbr1     | Q922Y1   | SSPPATDGPVSPSPSQEPPTK            | S(1): 47.0; S(2): 47.0; T(6): 6.0; S(13): 0.0; S(14): 0.0; S(16): 0.0; T(21): 0.0                                      | 0.50  | 0.39  |
| Ncoa7    | Q6A0A2   | SPSPVHLPEDPK                     | S(1): 0.0; S(3): 100.0                                                                                                 | 0.50  | -0.59 |
| Syn1     | O88935   | LPSPTAAPQQSASQATPVTTQGGQR        | S(3): 99.4; T(5): 0.6; S(11): 0.0; S(13): 0.0; T(16): 0.0; T(19): 0.0                                                  | 0.50  | -0.13 |
| Rgs7bp   | Q8BQC3-2 | YTLLPK                           | Y(1): 100.0; T(2): 0.0                                                                                                 | 0.50  | -0.46 |
| Wdr7     | Q920I9   | TYQVPPVQPASPGSHNALK              | T(1): 0.0; Y(2): 0.0; S(11): 99.4; S(14): 0.6                                                                          | 0.49  | -0.32 |
| Cplx1    | P63040   | EAEAQAAMEANSEGLTRPK              | S(12): 1.7; S(15): 86.8; T(17): 11.5                                                                                   | 0.49  | -0.40 |
| Specc1   | Q5SXY1   | LGSSPTSSCNPTPTK                  | S(3): 7.3; S(4): 7.3; T(6): 0.8; S(7): 75.9; S(8): 7.3; T(12): 0.8; T(14): 0.8                                         | 0.49  | -0.05 |
| Reps1    | E9Q632   | RQSSSYEDPWK                      | S(3): 98.9; S(4): 0.4; S(5): 0.4; Y(6): 0.4                                                                            | 0.49  | -0.15 |
| Rtn4     | Q99P72   | RGSGSVDETLFALPAASEVIPSSAEK       | S(3): 98.0; S(5): 1.0; T(9): 1.0; S(17): 0.0; S(23): 0.0; S(24): 0.0                                                   | 0.48  | 0.26  |
| Aak1     | Q3UJH0-2 | EQGSSGLGSGSSGGSSGLGSGYIGR        | S(4): 0.0; S(5): 0.0; S(9): 0.1; S(11): 9.9; S(12): 90.0; S(17): 0.0; S(18): 0.0; S(19): 0.0; S(23): 0.0; Y(25): 0.0   | 0.48  | -0.40 |
| Apc      | B2RUG9   | QSVGSGSPVQTVGLETR                | S(2): 0.0; S(5): 0.4; S(7): 99.5; T(11): 0.0; T(16): 0.0                                                               | 0.48  | -0.62 |
| Rims1    | Q99NE5-5 | RASQSSLESSSGPPCIR                | S(3): 100.0; S(5): 0.0; S(6): 0.0; S(9): 0.0; S(10): 0.0; S(11): 0.0                                                   | 0.48  | 0.13  |
| Tbc1d5   | Q80XQ2   | EFTGSPPPSATK                     | T(3): 6.6; S(5): 93.3; S(9): 0.0; T(11): 0.0                                                                           | 0.48  | -0.33 |
| Tiam1    | G3UWG2   | ANSLGLDYAQK                      | S(3): 100.0; Y(8): 0.0                                                                                                 | 0.48  | 0.31  |
| Synj1    | E9Q7S0   | TPGPPSSQGSVDTQPAQK               | T(1): 0.0; S(6): 1.3; S(7): 10.2; S(10): 87.2; T(14): 1.3                                                              | 0.47  | -0.19 |
| Krt15    | Q61361   | GAIYSIPISEGGGSSSTPEDPAEAPR       | Y(4): 0.0; S(5): 0.0; S(9): 0.0; S(16): 7.7; S(17): 91.6; T(18): 0.7                                                   | 0.47  | -0.17 |
| Prl8a1   | Q9DA80   | VSSQPAPSQER                      | S(2): 50.0; S(3): 50.0; S(8): 0.0                                                                                      | 0.47  | -0.50 |
| Mff      | Q6PB44-2 | GAAAADLLSSPESQHGTTQPPGGGQPLLQPTK | S(9): 0.1; S(10): 25.0; S(11): 25.0; S(14): 25.0; T(19): 25.0; T(32): 0.0                                              | 0.47  | 0.03  |
| Ubqln2   | Q9QZD4   | QTSSSPEGCGVEIK                   | T(2): 0.0; S(3): 0.0; S(4): 5.1; S(5): 94.9                                                                            | 0.46  | 0.03  |
| Ssuh2    | Q8C1E1   | AGSLNLEITGQLNSK                  | S(3): 0.0; T(9): 13.7; S(14): 86.3                                                                                     | 0.46  | -0.15 |
| Trank1   | Q8BTI8   | SGTPPRPGSVTNMQADECTATPQR         | S(1): 0.0; T(3): 100.0; S(9): 0.0; T(11): 0.0; T(19): 0.0; T(21): 0.0                                                  | 0.45  | -0.13 |
| Tacc1    | F8VQ95   | APVSVACGGESPLDGICLSEADK          | S(4): 0.0; S(11): 100.0; S(19): 0.0                                                                                    | 0.45  | 0.21  |
| Gpr162   | Q3UMB5   | VASPANVGLHTLSR                   | S(3): 100.0; T(9): 0.0; T(12): 0.0; S(14): 0.0                                                                         | 0.45  | -0.36 |
| Ankrd50  | F7BE84   | SALQSAAWQGHVK                    | S(1): 100.0; S(5): 0.0                                                                                                 | 0.45  | -0.29 |
| Uqcrh    | P99028   | SQTEEDCTEELFDLHAR                | S(1): 8.2; T(3): 91.8; T(8): 0.0                                                                                       | -0.50 | 0.55  |
| Abi1     | Q8CBH5-2 | VAILTDDEEEQKR                    | T(5): 100.0                                                                                                            | -0.50 | 0.20  |
| Zswim8   | Q3UHH1-2 | KQSAGPNSPTGGGGGGGGGTR            | S(3): 0.0; S(8): 99.9; T(10): 0.1; S(18): 0.0; T(21): 0.0                                                              | -0.51 | 0.05  |
| Tns1     | E9Q0S6   | ETSDPSRTPEEPLNLEGLVAHR           | T(2): 0.0; T(3): 0.0; S(4): 0.0; S(7): 12.8; T(9): 87.2                                                                | -0.51 | 0.16  |



|               |          |                                    |                                                                                                                                             |       |       |
|---------------|----------|------------------------------------|---------------------------------------------------------------------------------------------------------------------------------------------|-------|-------|
| Epb4.111      | A2AUK5   | SLPELDRDKSDSETEGLVFAR              | S(1): 0.8; S(10): 99.2; S(12): 0.0; T(14): 0.0                                                                                              | -0.51 | -0.03 |
| Hcn1          | O88704   | RLGTPPGGAAGK                       | T(4): 100.0                                                                                                                                 | -0.52 | 0.34  |
| Klc2          | D3YXZ3   | DSLDDLPNEDEQSPAPSPGGDVAAQHGGYEIPAR | S(2): 0.0; S(14): 100.0; S(18): 0.0; Y(31): 0.0                                                                                             | -0.52 | 0.73  |
| Mcm6          | P97311   | DEEQTAESIK                         | T(5): 99.4; S(8): 0.6                                                                                                                       | -0.52 | 0.48  |
| Tbc1d10b      | Q8BHI9   | ALESVPIMILPEPK                     | S(4): 100.0                                                                                                                                 | -0.52 | 0.45  |
| Ncam1         | P13595   | NPPEAATAPASPK                      | T(7): 0.0; S(11): 100.0                                                                                                                     | -0.52 | 0.40  |
| Gpkow         | Q53YU8   | VEDLNTFGPK                         | T(6): 100.0                                                                                                                                 | -0.53 | -0.21 |
| Gng3          | P63216   | GETPVNSTMSIGQAR                    | T(3): 100.0; S(7): 0.0; T(8): 0.0; S(10): 0.0                                                                                               | -0.53 | 0.48  |
| Zc2hc1a       | Q8BJ42   | TTSKPLISVTAQSSTESTQDAYQDSR         | T(1): 0.0; T(2): 0.0; S(3): 0.0; S(8): 0.0; T(10): 0.0; S(13): 9.5; S(14): 80.6; T(15): 9.5; S(17): 0.2; T(18): 0.2; Y(22): 0.0; S(25): 0.0 | -0.53 | 0.73  |
| Sept5         | Q9Z2Q6   | FGIHVYQFPECDSDEDEDFKQQDR           | Y(6): 0.0; S(13): 100.0                                                                                                                     | -0.54 | 0.25  |
| Ahi1          | E9QP54   | ERSPPLTPK                          | S(3): 100.0; T(7): 0.0                                                                                                                      | -0.54 | 0.19  |
| Syt1          | P46096   | TLVMAVYDFDR                        | T(1): 0.0; Y(7): 100.0                                                                                                                      | -0.54 | 0.56  |
| Gm4951        | Q3U4W8   | AVDWIFSHIDDLAEAAAMDISEGR           | S(7): 0.0; S(21): 100.0                                                                                                                     | -0.54 | 0.47  |
| Map2          | P20357   | YTVPLPSPVQDSENLSGEGSFFYEGTDDK      | Y(1): 0.0; T(2): 0.0; S(7): 99.7; S(12): 0.2; S(16): 0.0; S(19): 0.0; S(21): 0.0; Y(23): 0.0; T(26): 0.0                                    | -0.54 | 0.75  |
| Bai3          | Q80ZD8   | RMSDPESVSSVFSDTPIVV                | S(3): 100.0; S(7): 0.0; S(9): 0.0; S(10): 0.0; S(13): 0.0; T(15): 0.0                                                                       | -0.55 | 0.44  |
| Map1a         | Q9QYR6-2 | ELALSSPEDLTQDFEELK                 | S(5): 4.0; S(6): 96.0; T(11): 0.0                                                                                                           | -0.55 | 0.40  |
| Iqsec2        | E9QAD8   | AQNPAYFEGKPAASLDEGAMAGAR           | Y(6): 0.0; S(13): 100.0                                                                                                                     | -0.56 | 0.04  |
| Ppp1r1b       | Q60829   | AVQHLQITSNLSENQASEEDELGELR         | T(7): 0.0; S(9): 0.0; S(12): 0.0; S(17): 100.0                                                                                              | -0.56 | 0.91  |
| Psma5         | Q9Z2U1   | ITSPLMEPSSIEK                      | T(2): 96.0; S(3): 4.0; S(9): 0.0; S(10): 0.0                                                                                                | -0.56 | 0.38  |
| Rtn4          | Q99P72   | ESAEFSVLEYSEMSSFNNGSPK             | S(2): 0.0; S(6): 0.0; Y(10): 0.0; S(11): 0.0; S(15): 0.3; S(16): 2.0; S(20): 97.6                                                           | -0.58 | 0.27  |
| Ctnd2         | E9QKH8   | TGSQHGPQNAAAATFOR                  | T(1): 8.4; S(3): 91.6; T(14): 0.0                                                                                                           | -0.58 | 0.01  |
| Map1b         | P14873   | SPLLGSESPYEDFLSADSK                | S(1): 100.0; S(7): 0.0; S(9): 0.0; Y(11): 0.0; S(16): 0.0; S(19): 0.0                                                                       | -0.58 | 0.26  |
| Syn2          | Q64332   | SQSLTNAFSFSESSFFR                  | S(1): 0.0; S(3): 100.0; T(5): 0.0; S(9): 0.0; S(11): 0.0; S(13): 0.0; S(14): 0.0                                                            | -0.58 | 0.05  |
| Ube4b         | Q9ERZ4   | EPVANQDPVSPSLVQGR                  | S(10): 11.0; S(12): 89.0                                                                                                                    | -0.58 | 0.28  |
| Ppme1         | Q8BVL3   | VTSSVPLPSGGTSSPSR                  | T(2): 0.0; S(3): 0.0; S(4): 0.0; S(9): 0.5; T(12): 6.3; S(13): 80.5; S(14): 6.3; S(16): 6.3                                                 | -0.58 | 0.31  |
| Ccdc92        | Q8VDN2   | VDNSSLTGESEPQTRSPDFTNENPLETR       | S(4): 0.0; S(5): 0.0; T(7): 0.7; S(10): 97.8; T(14): 0.7; S(16): 0.7; T(20): 0.0; T(27): 0.0                                                | -0.59 | 0.16  |
| Arhgef10      | F7BQE4   | FIVSATAFQNK                        | S(4): 93.3; T(6): 6.7                                                                                                                       | -0.60 | 0.90  |
| Tp53bp1       | P70399   | GREDAVAEDVCIDLTCDSGSQAVPSPATR      | T(15): 0.0; S(18): 0.0; S(20): 0.0; S(25): 99.3; T(28): 0.7                                                                                 | -0.60 | 0.71  |
| Nup37         | Q9CWE0   | ASSFADMMGILK                       | S(2): 3.8; S(3): 96.2                                                                                                                       | -0.60 | 0.47  |
| Arfgap1       | Q9EPJ9-2 | RSSDSWDVWGSASNNK                   | S(2): 7.1; S(3): 85.9; S(5): 7.1; S(11): 0.0; S(13): 0.0; S(15): 0.0                                                                        | -0.60 | -0.06 |
| Rgs12         | E9Q1K7   | TLPDSQVPPSPASK                     | T(1): 0.0; S(5): 0.0; S(10): 6.6; S(11): 92.9; S(14): 0.5                                                                                   | -0.60 | 0.56  |
| Marcks        | P26645   | AEDGAAPSPSETPKK                    | S(8): 0.0; S(10): 33.3; S(11): 33.3; T(13): 33.3                                                                                            | -0.60 | -0.37 |
| Pcsk1n        | Q9QXS6   | MAPPTIPTRSPSDSSTASTPIAEQIER        | T(4): 33.2; T(8): 33.2; S(10): 33.2; S(12): 0.3; S(14): 0.0; S(15): 0.0; T(16): 0.0; S(18): 0.0; T(19): 0.0                                 | -0.60 | -0.11 |
| Ntng1         | F8WJ50   | GTANTCDLTLVPTSPPK                  | T(2): 0.0; T(5): 0.0; T(9): 0.0; T(12): 1.7; T(15): 11.7; S(16): 86.6                                                                       | -0.60 | 0.33  |
| Atp8a1        | P70704   | SESLQQNLLHGYAFSQDENGIVSQSEVIR      | S(1): 0.0; S(3): 100.0; Y(12): 0.0; S(15): 0.0; S(23): 0.0; S(25): 0.0                                                                      | -0.61 | 2.83  |
| Mag           | P20917   | GESPELDLSYSHSDLGK                  | S(3): 100.0; S(9): 0.0; Y(10): 0.0; S(11): 0.0; S(13): 0.0                                                                                  | -0.61 | 0.12  |
| Slic39a10     | Q6P5F6   | LNTELTDLEAQESPPKNYLGVEEEK          | T(4): 0.0; T(7): 0.0; S(15): 10.3; Y(20): 89.7                                                                                              | -0.62 | 0.47  |
| Syngap1       | F6SEU4   | DLNSSIDLQSFMAR                     | S(4): 0.3; S(5): 99.7; S(10): 0.0                                                                                                           | -0.62 | -0.27 |
| D430041D05Rik | D3YZ21   | QSLNSPSPGETEMDLLVTR                | S(2): 0.0; S(5): 100.0; S(7): 0.0; T(11): 0.0; T(18): 0.0                                                                                   | -0.62 | 0.14  |
| Chga          | P26339   | GELEHSQQEEDGEEAMVGTPOGLFPQGGK      | S(6): 100.0; T(19): 0.0                                                                                                                     | -0.63 | 0.55  |
| Tmsb4x        | P20065-2 | TETQEKNLPSK                        | T(1): 0.0; T(3): 100.0; S(11): 0.0                                                                                                          | -0.63 | 0.15  |
| Slic1a2       | P43006-2 | ESNSNQCVYAAHNSVVIDECK              | S(2): 50.0; S(4): 50.0; Y(9): 0.0; S(14): 0.0                                                                                               | -0.63 | 0.36  |
| Begain        | F8WIG2   | ADSFSEDDLQSGHLAEPFLR               | S(3): 100.0; S(5): 0.0; S(11): 0.0                                                                                                          | -0.63 | 0.05  |
| Twf1          | Q91YM2   | AGSPLCNLQDSEEDVEPPSYHLFR           | S(3): 100.0; S(8): 0.0; S(13): 0.0; S(21): 0.0; Y(22): 0.0                                                                                  | -0.64 | 0.32  |
| Sh3gl1        | Q62418-3 | QLTQPETSYGR                        | T(3): 100.0; T(7): 0.0; S(8): 0.0; Y(9): 0.0                                                                                                | -0.64 | 0.28  |
| Camsap2       | Q8C0T7   | SEGLTQGAATTSTARR                   | S(1): 0.0; T(4): 0.1; T(10): 98.7; T(11): 1.1; S(12): 0.0; T(13): 0.0                                                                       | -0.64 | 0.50  |

|          |          |                                  |                                                                                                   |       |       |
|----------|----------|----------------------------------|---------------------------------------------------------------------------------------------------|-------|-------|
| Chrm2    | Q9ERT9   | RPTPATLVLTSDQSSPEIDEDR           | T(3): 0.0; T(6): 0.0; T(10): 0.0; S(11): 0.0; S(14): 0.3; S(15): 99.7                             | -0.65 | 0.59  |
| Lppr2    | Q8VCY8-2 | LSPWEDLSQAPTMDSPLEK              | S(2): 0.0; S(8): 0.0; T(12): 0.0; S(15): 100.0                                                    | -0.66 | 0.38  |
| Gm996    | A2AJA9   | QRSLEQLDELITDLVIDSR              | S(3): 100.0; T(12): 0.0; S(18): 0.0                                                               | -0.66 | 0.43  |
| Garnl3   | A2AUQ6   | GCSFESPSTAPQPPGLMDPLTK           | S(3): 78.3; S(6): 10.2; S(8): 10.2; T(9): 1.4; T(22): 0.0                                         | -0.67 | 0.02  |
| Larp4b   | Q6A099   | FQLEMYIK                         | Y(6): 100.0                                                                                       | -0.68 | 0.21  |
| Kbtbd11  | Q8BNN1   | SGDLAPPESPSPGQASPR               | S(1): 0.0; S(9): 33.3; S(11): 33.3; S(12): 33.3; S(17): 0.0                                       | -0.68 | -0.18 |
| Lppr4    | Q7TME0   | MSLQVMDTEPEGQSPPR                | S(2): 0.0; T(8): 0.0; S(14): 100.0                                                                | -0.69 | 0.19  |
| Apoa1bp  | Q8K3I9   | VPCNVEGISPELEK                   | S(9): 100.0                                                                                       | -0.69 | 0.74  |
| Fam195b  | Q3UED7   | LYFLDMVTEDAKTLK                  | Y(2): 100.0; T(8): 0.0; T(13): 0.0                                                                | -0.69 | 0.23  |
| Cep170b  | Q80U49   | SQGPRDTDDDEEEDPYGFIVQTAEIAEIAIR  | S(1): 0.2; T(7): 99.6; Y(17): 0.2; T(23): 0.0                                                     | -0.70 | 0.51  |
| Brsk1    | Q5PR73   | CDESPNREVQSSEAEALAR              | S(4): 100.0; S(11): 0.0; S(12): 0.0                                                               | -0.70 | 0.76  |
| Echdc1   | Q9D8U8   | SVSVDLNVDPQLDIPDALSER            | S(1): 12.1; S(3): 87.9; S(11): 0.0; S(21): 0.0                                                    | -0.70 | -0.37 |
| Gprin1   | Q3UNH4   | DLAAAAAQKSPSAEAAAAPPGR           | S(10): 100.0; S(12): 0.0                                                                          | -0.71 | 0.33  |
| Cldn11   | Q60771   | FYYSSGSSSPTHAK                   | Y(2): 0.0; Y(3): 0.0; S(4): 0.0; S(5): 0.0; S(7): 0.0; S(8): 0.5; S(9): 99.5; T(11): 0.0          | -0.73 | 0.31  |
| Slc1a3   | P56564   | DVEMGNSVIEENEMK                  | S(7): 100.0                                                                                       | -0.73 | 0.92  |
| Coro1a   | O89053   | RATPEPSGTSSDTSVSR                | T(3): 100.0; S(7): 0.0; T(9): 0.0; S(11): 0.0; S(12): 0.0; T(14): 0.0; S(16): 0.0                 | -0.73 | -0.28 |
| Adcy5    | P84309   | SVSPPGYAAQTAASPAPR               | S(1): 0.0; S(3): 100.0; Y(7): 0.0; T(11): 0.0; S(14): 0.0                                         | -0.75 | 0.01  |
| Slc39a10 | Q6P5B8   | ANSSGGGGGGSGVSGSSK               | S(3): 0.0; S(4): 0.0; S(12): 0.0; S(15): 0.8; S(17): 49.6; S(18): 49.6                            | -0.75 | 0.06  |
| Pcdh1    | F7BJK1   | IHLPLNYPGSPDLGR                  | Y(7): 0.0; S(11): 100.0                                                                           | -0.75 | 0.31  |
| Acap2    | Q6ZQ18   | SIGETISLQVEVESR                  | S(1): 100.0; T(5): 0.0; S(7): 0.0; S(14): 0.0                                                     | -0.76 | 0.66  |
| Gng3     | P63216   | MKGETPVNSTMISIGQAR               | T(5): 4.8; S(9): 47.4; T(10): 47.4; S(12): 0.5                                                    | -0.76 | 0.81  |
| Map6d1   | Q14BB9   | SDVAVPLTLHGYSDPGSEESGADCSVSR     | S(1): 0.0; T(8): 0.0; Y(12): 0.4; S(13): 0.4; S(17): 49.2; S(20): 49.2; S(25): 0.4; S(27): 0.4    | -0.76 | -0.19 |
| Clasp2   | E9Q8N5   | NTNGTQSSMGSPTRPTPR               | T(2): 0.0; T(6): 0.0; S(8): 0.0; S(9): 0.6; S(12): 99.4; T(15): 0.0; T(18): 0.0                   | -0.78 | 0.25  |
| Dlg4     | Q62073   | SIQDLTVTGTEPGQVSSR               | S(1): 100.0; T(6): 0.0; T(8): 0.0; T(10): 0.0; S(16): 0.0; S(17): 0.0                             | -0.78 | 0.33  |
| Homer2   | Q9JME5   | AFYGSSEDEAKGPGSEEAATAALPAR       | Y(3): 0.6; S(5): 99.4; S(15): 0.0; T(20): 0.0                                                     | -0.79 | 0.09  |
| Pvr11    | Q9JKC6   | ADPVLNNHNSLKPAPTVPAAAPSSPDATSEPK | S(10): 0.0; T(17): 0.0; S(23): 48.6; S(24): 48.6; T(28): 1.4; S(29): 1.4                          | -0.79 | 0.53  |
| Pnpo     | Q91XF0   | GLATGDSPLGPMTHHGEEEDWVYER        | T(4): 0.3; S(7): 99.7; T(13): 0.0; Y(22): 0.0                                                     | -0.79 | 0.34  |
| Apc      | B2RUG9   | TPASKSPSEGGATTSPR                | T(1): 0.0; S(4): 49.9; S(6): 49.9; S(8): 0.2; T(14): 0.0; T(15): 0.0; S(16): 0.0                  | -0.80 | -0.03 |
| Begain   | F8WIG2   | GDIYCDPALYCPDER                  | Y(4): 0.0; S(6): 100.0; Y(11): 0.0                                                                | -0.81 | 0.71  |
| Gas7     | B1ATI9   | KSTGDSQNLGSSSPGR                 | S(2): 0.0; T(3): 0.0; S(6): 0.1; S(11): 33.3; S(12): 33.3; S(13): 33.3                            | -0.82 | 0.32  |
| Gprin1   | Q3UN16   | RLSLGSPDSR                       | S(3): 100.0; S(6): 0.0; S(9): 0.0                                                                 | -0.83 | 0.68  |
| Map6d1   | Q149S1   | LLSEVEELNMSLR                    | S(3): 2.5; S(11): 97.5                                                                            | -0.83 | 0.09  |
| Cacna1b  | A2AIR9   | EVAEVSPMSAANISIAAR               | S(6): 99.9; S(9): 0.1; S(14): 0.0                                                                 | -0.83 | 0.45  |
| Atp13a1  | Q9EPB4   | EIHPLYLMDLEQS                    | Y(5): 0.0; S(13): 100.0                                                                           | -0.84 | 0.19  |
| Col3a1   | P08121   | GENGSPGAPGAPGHPGPPGVPVPSGK       | S(5): 100.0; S(24): 0.0                                                                           | -0.85 | -0.17 |
| Tbc1d22a | Q8R574   | LGIAVIHGEAQDAESDLVDGRHSPPMVR     | S(15): 0.0; S(23): 100.0                                                                          | -0.86 | 0.19  |
| Trim3    | Q3B7Z2   | GATVLPANPPGSAGSGK                | T(3): 100.0; S(12): 0.0; S(15): 0.0                                                               | -0.87 | 0.71  |
| Kcnma1   | J3QN27   | RLEDEQPPTLSPK                    | T(9): 0.3; S(11): 99.7                                                                            | -0.87 | 0.41  |
| Atp1a3   | Q6PIC6   | VDNSSLTGESEPTQTRSPDCTHDNPLETR    | S(4): 16.7; S(5): 16.7; T(7): 16.7; S(10): 16.7; T(14): 16.7; S(16): 16.7; T(20): 0.0; T(27): 0.0 | -0.88 | 0.70  |
| Map1a    | Q9QYR6-2 | MASPPPSGPPSAAHTPFHQSPVEEK        | S(3): 98.9; S(7): 1.1; S(11): 0.0; T(15): 0.0; S(20): 0.0                                         | -0.88 | 0.77  |
| Ncor2    | F8VQL9   | TSVLGSSEDAIEPVSPPEGMTEPGHAR      | T(1): 0.0; S(2): 0.0; S(6): 0.0; S(7): 0.0; S(15): 100.0; T(21): 0.0                              | -0.90 | 0.55  |
| Map3k7   | Q61937   | CGSGPVHISGQHLVAVEEDAEESEDEEDVK   | S(3): 0.0; S(9): 0.0; S(22): 100.0                                                                | -0.91 | 0.58  |
| Dzank1   | Q8BYW1-2 | DAPISPPAQK                       | S(5): 100.0                                                                                       | -0.94 | -0.06 |
| Cacng8   | F7CZ64   | DASPGGPGGPGFASTDISMYTLR          | S(3): 100.0; S(14): 0.0; T(15): 0.0; S(18): 0.0; Y(20): 0.0; T(21): 0.0; S(23): 0.0               | -0.94 | 0.66  |
| Col1a1   | P11087-2 | GDAGPAGPKGEPGSPGENGAPQMGPR       | S(14): 100.0                                                                                      | -0.94 | -0.06 |
| Caskin1  | Q6P9K8-2 | KTPQSLEMMIAIESPPSEAAAECQSPK      | T(2): 0.0; S(5): 0.0; S(13): 0.0; S(17): 9.8; S(26): 90.2                                         | -0.95 | 1.34  |

|         |          |                                |                                                                                                                       |       |       |
|---------|----------|--------------------------------|-----------------------------------------------------------------------------------------------------------------------|-------|-------|
| Akt2    | Q60771   | FYSSGSSSPHAK                   | Y(2): 0.0; Y(3): 0.0; S(4): 0.0; S(5): 1.9; S(7): 32.0; S(8): 32.0; S(9): 32.0; T(11): 1.9                            | -0.95 | 0.30  |
| Syngap1 | F6SEU4   | EGSIGGSGGGGGGGLKPSITK          | S(3): 0.0; S(7): 33.2; S(10): 33.2; S(21): 33.2; T(23): 0.3                                                           | -0.96 | 0.32  |
| Sirt2   | Q8VDQ8-2 | EHANIDAQSGSQAPNPSTTISPGKSPPPAK | S(9): 0.0; S(11): 0.0; S(17): 0.0; T(18): 0.0; T(19): 0.0; S(21): 0.0; S(25): 100.0                                   | -0.96 | 0.51  |
| Pclo    | Q9QYX7   | GGSLGCQTETDPDTQSPPYMGATSPPKDK  | S(3): 0.0; T(8): 0.0; T(10): 0.0; T(14): 20.0; S(16): 20.0; Y(19): 20.0; T(23): 20.0; S(24): 20.0                     | -0.97 | 0.52  |
| Lrrc8e  | Q64514-2 | VNESSHYDLAFTDVHFKPGQIR         | S(4): 25.0; S(5): 25.0; Y(7): 25.0; T(12): 25.0                                                                       | -0.99 | 1.16  |
| Col3a1  | P08121   | GFPNGPGPPGSPAAGHQGAIGSPGAPGR   | S(11): 50.0; S(23): 50.0                                                                                              | -1.00 | -0.07 |
| Nbea    | Q9EPJ9-2 | EWSLESSPAQNWTPPQPK             | S(3): 0.0; S(6): 0.0; S(7): 0.0; T(13): 100.0                                                                         | -1.00 | 0.57  |
| Rims1   | Q99MX7   | SSYGAPPSAPPPPPPPQGGSQR         | S(1): 2.2; S(2): 48.9; Y(3): 48.9; S(8): 0.0; S(22): 0.0                                                              | -1.01 | 0.58  |
| Rmdn3   | Q3UID0   | DMDEPSPVNVVEEVLTK              | S(6): 100.0; T(15): 0.0                                                                                               | -1.02 | 0.57  |
| Il1a    | P01582   | ESRVTVSATSSNGK                 | S(2): 0.0; T(5): 0.0; S(7): 3.6; T(9): 46.4; S(10): 46.4; S(11): 3.6                                                  | -1.03 | -0.10 |
| Mtfr1l  | Q9CW07   | SFSLPADPILQAAK                 | S(1): 3.8; S(3): 96.2                                                                                                 | -1.06 | 0.17  |
| Pnpo    | Q91WH7   | VDNSSLTGESEPTRSPECTHESPLETR    | S(4): 0.0; S(5): 0.0; T(7): 0.2; S(10): 0.7; T(14): 77.4; S(16): 15.3; T(20): 3.2; S(23): 3.2; T(27): 0.0             | -1.07 | 0.21  |
| Col4a1  | P02463   | VVPLPGPPGAAGLPGSPGFPQGDGR      | S(16): 100.0                                                                                                          | -1.10 | 0.71  |
| Dopey2  | Q3UHL1   | SATPATDGRATPATEESTVPATQSSALPAK | S(1): 0.0; T(3): 0.0; T(6): 1.1; T(11): 98.9; T(14): 0.0; S(17): 0.0; T(18): 0.0; T(22): 0.0; S(24): 0.0; S(25): 0.0  | -1.10 | 0.17  |
| Cep170b | Q80U49   | GASPVTPSTTPPPPTDQLTK           | S(3): 0.0; T(6): 0.0; S(8): 0.0; T(9): 0.0; T(10): 0.4; T(15): 99.6; T(20): 0.0                                       | -1.15 | 0.17  |
| Braf    | F6SZ47   | SSSAPNVHINTIEPVNIDDLIR         | S(1): 47.2; S(2): 47.2; S(3): 5.6; T(11): 0.0                                                                         | -1.19 | 1.04  |
| Strn4   | P58404-2 | SLENGAGEPVEGAPR                | S(1): 100.0                                                                                                           | -1.23 | -0.41 |
| Slc8a2  | Q8K4Z3   | RGSETMAGAAVK                   | S(3): 100.0; T(5): 0.0                                                                                                | -1.25 | 0.42  |
| Cecr6   | Q99MV7-3 | SAVSINDQLVK                    | S(1): 100.0; S(4): 0.0                                                                                                | -1.26 | 1.22  |
| Cplx2   | P84086   | AALEQPCEGSLTRPK                | S(10): 99.6; T(12): 0.4                                                                                               | -1.29 | 0.07  |
| Syap1   | Q9D2P8   | HQPAASPVVVR                    | S(6): 100.0                                                                                                           | -1.34 | 0.36  |
| Scn11a  | Q9QZS8-2 | VHAPSATPSTSAQPASPAR            | S(5): 0.0; T(7): 0.0; S(9): 0.0; T(10): 0.0; S(11): 0.0; S(16): 100.0                                                 | -1.36 | -0.18 |
| Tmem163 | Q8C996   | GHAPSTAAPASPAPMSSSVQSDEER      | S(5): 0.0; T(6): 0.0; S(12): 0.0; S(17): 84.4; S(18): 7.5; S(19): 0.7; S(22): 7.5                                     | -1.36 | 0.86  |
| Ehd3    | Q9QXW9   | NHPGSDTSPEAEASSGGGVALK         | S(5): 6.3; T(7): 6.3; S(8): 87.5; S(14): 0.0; S(15): 0.0                                                              | -1.39 | 1.64  |
| Kif1b   | Q60520   | VEDALSYLDQVK                   | S(6): 0.1; Y(7): 99.9                                                                                                 | -1.57 | 1.20  |
| Nedd4l  | E9PXB7   | SLSSPTVTLAPLEGAK               | S(1): 1.4; S(3): 76.0; S(4): 9.9; T(6): 9.9; T(8): 1.4; S(10): 1.4                                                    | -1.57 | 0.96  |
| Vcpip1  | Q8CCF0-2 | FPELESLVPNALDYIRTVK            | S(6): 83.0; Y(14): 14.3; T(17): 2.7                                                                                   | -1.66 | 0.43  |
| Slc2a13 | Q3UHJ0-2 | EQGSSGLGSGSSGGGSSGLGSGYIGR     | S(4): 0.3; S(5): 0.3; S(9): 3.9; S(11): 16.4; S(12): 74.0; S(17): 3.9; S(18): 1.0; S(19): 0.3; S(23): 0.0; Y(25): 0.0 | -1.67 | 0.69  |
| Maoa    | Q640R3   | QNSLEYMDQNDDRDK                | S(3): 99.7; Y(6): 0.3                                                                                                 | -1.70 | 0.81  |
| Hspa12a | Q8K0T0   | EQDSPPMKPGALDAIR               | S(4): 100.0                                                                                                           | -2.16 | 0.21  |

**Supplementary Table S6. Proteins up and down phosphorylated in the cerebellum of Ts65Dn mice and reverted by L41 treatment.**

| Gene name     | Protein Group Accessions | Sequence                         | phosphoRS Site Probabilities                                                                              | Ts65Dn vs WT | Ts65Dn +/-L41 |
|---------------|--------------------------|----------------------------------|-----------------------------------------------------------------------------------------------------------|--------------|---------------|
| Aqr           | A2AQA7                   | IFTQLEEFR                        | T(3): 100.0                                                                                               | 3.79         | -3.42         |
| C130026121Rik | Q3KNJ6                   | GSAWANLSELVQGSR                  | S(2): 99.0; S(8): 0.5; S(14): 0.5                                                                         | 3.30         | -2.67         |
| Robo2         | E9PYK2                   | SVVIGGLFPGIQYR                   | S(1): 0.1; Y(13): 99.9                                                                                    | 2.50         | -2.14         |
| Tmbim1        | D3Z0A5                   | AGSDSFRPGEWDDR                   | S(3): 100.0; S(5): 0.0                                                                                    | 2.25         | -2.47         |
| Madd          | A2AGR0                   | ATLSDSEIETNSATSIFGK              | T(2): 6.4; S(4): 6.4; S(6): 87.2; T(10): 0.0; S(12): 0.0; T(14): 0.0; S(15): 0.0                          | 1.88         | -0.18         |
| Map1b         | P14873                   | TTRSPDTSAYCYETMEK                | T(1): 0.0; T(2): 0.2; S(4): 99.8; T(7): 0.0; S(8): 0.0; Y(10): 0.0; Y(12): 0.0; T(14): 0.0                | 1.70         | -1.15         |
| Ubap2l        | Q80X50                   | RYPSSISSSPQK                     | Y(2): 0.0; S(4): 0.0; S(5): 0.0; S(7): 0.0; S(8): 0.0; S(9): 100.0                                        | 1.58         | -1.56         |
| Psm4          | O35226                   | AAAASAAEAGIATPGTEDSDALLK         | S(5): 0.0; T(13): 100.0; T(16): 0.0; S(19): 0.0                                                           | 1.58         | -0.54         |
| Efh2          | Q8C845                   | ADLNQGIGEPQSPRR                  | S(12): 98.8; S(14): 1.2                                                                                   | 1.57         | -1.47         |
| Gabbr2        | Q80T41                   | DLEEVMTQLQDTPEK                  | T(6): 0.0; T(12): 100.0                                                                                   | 1.57         | -1.30         |
| Slc43a2       | Q8CGA3                   | LCLSTVDLEVK                      | S(4): 50.0; T(5): 50.0                                                                                    | 1.41         | -0.29         |
| Map1b         | P14873                   | DYNASASTISPPSSMEEDK              | Y(2): 0.0; S(5): 0.0; S(7): 0.0; T(8): 0.2; S(10): 99.7; S(13): 0.0; S(14): 0.0                           | 1.39         | -1.48         |
| Htt           | P42859                   | ASDPSATPDSESVIVAMER              | S(2): 0.0; S(5): 0.3; T(8): 97.7; S(11): 1.8; S(13): 0.3                                                  | 1.39         | -0.60         |
| Pkp4          | Q68FH0                   | TEPEQGTLYSPEQTSLHSEGLNSR         | T(1): 0.0; T(7): 0.0; Y(9): 0.0; S(10): 0.4; T(14): 49.8; S(15): 49.8; S(19): 0.0; S(22): 0.0; S(26): 0.0 | 1.38         | -1.42         |
| Impact        | O55091                   | KTEEVEVESEEDPILEHPPENPVK         | T(2): 0.0; S(9): 100.0                                                                                    | 1.36         | -0.08         |
| Ctage5        | H3BK44                   | AFLSPPTLLEGPLR                   | S(4): 99.3; T(7): 0.7                                                                                     | 1.34         | -0.37         |
| Pacs2         | Q3V3Q7                   | EPGQPEDSPEAETSLDVFTEK            | S(3): 0.0; S(9): 100.0; T(14): 0.0; S(15): 0.0; T(16): 0.0; T(21): 0.0                                    | 1.33         | -0.11         |
| Mpdz          | Q8VBX6-2                 | NVQGLGITIAGYIGDK                 | T(8): 98.6; Y(12): 1.4                                                                                    | 1.31         | -0.50         |
| Epn2          | Q5NCM5                   | AGGSPASYHGSPEALCPQHR             | S(4): 0.0; S(7): 0.0; Y(8): 0.0; S(11): 50.0; S(15): 50.0                                                 | 1.31         | -1.46         |
| Eif4b         | Q8BGD9                   | SPPYTAFLGNLPYDVTEDSIK            | S(1): 33.3; Y(4): 33.3; T(5): 33.3; Y(13): 0.0; T(16): 0.0; S(19): 0.0                                    | 1.28         | -0.92         |
| Bcas3         | Q0VF62                   | EGSIETLSNSSGSGSIPR               | S(3): 100.0; T(6): 0.0; S(8): 0.0; S(10): 0.0; S(11): 0.0; S(13): 0.0; T(14): 0.0; S(15): 0.0; S(17): 0.0 | 1.27         | -1.17         |
| Arhgef2       | H3BJU7                   | LSPPHSPR                         | S(2): 100.0; S(6): 0.0                                                                                    | 1.23         | -1.04         |
| Coro1a        | O89053                   | RATPEPSGTPSSDTSR                 | T(3): 99.8; S(7): 0.1; T(9): 0.0; S(11): 0.0; S(12): 0.0; T(14): 0.0; S(16): 0.0                          | 1.14         | -1.00         |
| Tom1l2        | Q5SRX1                   | GIEFPMADLDALSPIHTPQR             | S(13): 100.0; T(17): 0.0                                                                                  | 1.06         | 0.01          |
| Slc1a4        | O35874                   | SEETSPLVTHQNPAGPVIAPELESK        | S(1): 0.0; T(5): 1.0; S(6): 99.0; T(10): 0.0; S(26): 0.0                                                  | 1.06         | -0.43         |
| Cacna1g       | P39061-2                 | QTVSVPGPPGPPGPPGAMGASAGQVR       | T(2): 6.0; S(4): 93.5; S(24): 0.5                                                                         | 1.06         | -0.23         |
| Ank1          | Q02357-5                 | EYSLSPSQVNGQQR                   | Y(2): 0.0; S(3): 0.0; S(5): 99.5; S(7): 0.5                                                               | 1.04         | -1.08         |
| Dmxl2         | Q8BPN8-2                 | RQSESIAPPVASEMDK                 | S(3): 50.0; S(5): 50.0; S(13): 0.0                                                                        | 1.00         | -1.10         |
| Clns1a        | Q923F1                   | LGEEESKEPLSDEEEDNDVPISEFR        | S(5): 0.0; S(10): 100.0; S(24): 0.0                                                                       | 0.99         | -0.29         |
| Add2          | Q9QYB8                   | SPSTESQLMSK                      | S(1): 0.0; S(3): 95.1; T(4): 4.8; S(6): 0.0; S(10): 0.0                                                   | 0.99         | -0.26         |
| Upf1          | Q9EPU0-2                 | AGLSQSLFER                       | S(4): 10.2; S(6): 89.8                                                                                    | 0.99         | -0.55         |
| Epb4.111      | A2AUK8                   | GPSSQEDESGLDSDPDRGACSTPEMPQFESVK | S(3): 0.0; S(4): 0.0; S(9): 3.0; S(15): 14.9; S(22): 79.2; T(23): 3.0; S(31): 0.0                         | 0.98         | -0.65         |
| Palmd         | Q3UVT7                   | SNGPTHSPTRPTPQPR                 | S(1): 0.0; T(5): 0.3; T(7): 49.9; S(8): 49.9; T(10): 0.0; T(13): 0.0                                      | 0.96         | -0.79         |
| Kif17         | A2AM72                   | EYQEEIK                          | Y(2): 100.0                                                                                               | 0.94         | -0.75         |
| Ppig          | A2AR02                   | SETPPHWR                         | S(1): 0.0; T(3): 100.0                                                                                    | 0.94         | -0.84         |
| Plekha6       | P16014                   | WASSREDAGAPVEDSQGQTK             | S(3): 50.0; S(4): 50.0; S(15): 0.0; T(19): 0.0                                                            | 0.93         | -0.09         |

|          |          |                                               |                                                                                                                                                |      |       |
|----------|----------|-----------------------------------------------|------------------------------------------------------------------------------------------------------------------------------------------------|------|-------|
| K1967    | Q8VDP4   | SVASNQSEMEYSSLQDMPK                           | S(1): 0.0; S(4): 99.7; S(7): 0.3; Y(11): 0.0; S(12): 0.0; S(13): 0.0                                                                           | 0.93 | -1.59 |
| Osbp     | Q3B7Z2   | GDMSDEDDENEFFDAPEIITMPENLGHK                  | S(4): 100.0; T(20): 0.0                                                                                                                        | 0.92 | 0.09  |
| Dpysl5   | Q9EQF6   | EMGTPLADTPTRPVTR                              | T(4): 100.0; T(9): 0.0; T(11): 0.0; T(15): 0.0                                                                                                 | 0.91 | -0.70 |
| Shank3   | Q4ACU6   | LGAEERPGTPELAPAPMQAAVAEPM<br>PSPR             | T(10): 100.0; S(29): 0.0                                                                                                                       | 0.90 | -0.81 |
| Phkb     | Q7TSH2   | EGPNFITMEGTVSDHIER                            | T(7): 10.0; T(11): 10.0; S(13): 80.1                                                                                                           | 0.89 | -0.42 |
| Ryr2     | E9Q401   | RISQTSQVSDAAHGYSR                             | S(3): 100.0; T(5): 0.0; S(6): 0.0; S(9): 0.0; Y(16): 0.0; S(17): 0.0                                                                           | 0.88 | -0.88 |
| Acin1    | O88737   | SQGSFEYQDTQDHDYGGGR                           | S(1): 0.0; S(4): 100.0; Y(7): 0.0; T(10): 0.0; Y(15): 0.0                                                                                      | 0.87 | -0.73 |
| Nfix     | Q3TYK3   | SPAAGSSQSSGWPNDVDAGSPR                        | S(1): 0.0; S(6): 0.0; S(7): 0.0; S(9): 0.0; S(10): 0.0; S(20): 100.0                                                                           | 0.87 | -0.38 |
| Arfp2    | Q8K221   | HPSHSTSPSGPGDEVAR                             | S(3): 0.0; S(5): 0.0; T(6): 0.4; S(7): 99.6; S(9): 0.0                                                                                         | 0.86 | -0.47 |
| Ralgps1  | F6WZ83   | LVSSKEDLAGPSAGSSAR                            | S(3): 50.0; S(4): 50.0; S(12): 0.0; S(15): 0.0; S(16): 0.0; S(17): 0.0                                                                         | 0.86 | -0.69 |
| Sh3bp5l  | Q99LH9   | EAQQETQK                                      | T(6): 100.0                                                                                                                                    | 0.85 | -0.38 |
| Slc38a10 | Q5I012-4 | QDVFGESEER                                    | S(8): 100.0                                                                                                                                    | 0.85 | -0.67 |
| Rtn1     | Q8K0T0   | SPPVAMETASTGMAAVPDALDHSPSTL<br>K              | S(1): 0.0; T(8): 97.2; S(10): 0.0; T(11): 0.0; S(23): 0.9; S(25): 0.9; S(26): 0.9; T(27): 0.0                                                  | 0.84 | -1.35 |
| Ebag9    | Q9D0V7   | KLSGDQITLPTTVDYSSVPK                          | S(3): 99.9; T(8): 0.1; T(11): 0.0; T(12): 0.0; Y(15): 0.0; S(16): 0.0; S(17): 0.0                                                              | 0.83 | -0.39 |
| Slc9a1   | Q61165   | CLSDPGPHPEPGEPEFIPK                           | S(3): 100.0                                                                                                                                    | 0.82 | -0.23 |
| Arid1b   | E9Q6R4   | SSPALAAPDASVDPK                               | S(1): 5.9; S(2): 94.1; S(11): 0.0                                                                                                              | 0.82 | -0.74 |
| Kif2a    | P28740-1 | EFGISPSDIPFSQGGSRPDLSPSYDYD<br>DFSPSITR       | S(5): 0.3; S(7): 0.3; S(12): 32.9; S(17): 32.9; S(22): 32.9; S(24): 0.3; Y(25): 0.3; Y(27): 0.0; S(31): 0.0; S(33): 0.0; T(35): 0.0            | 0.81 | -0.62 |
| Pkp4     | Q68FH0   | AQSPSYVTSTGVSPSR                              | S(3): 0.0; S(5): 0.0; Y(6): 0.0; T(8): 0.0; S(9): 0.1; T(10): 0.1; S(13): 9.5; S(15): 90.2                                                     | 0.80 | -0.75 |
| Oxct1    | Q9D0K2   | HHTKFYTDPEAVK                                 | T(3): 100.0; Y(6): 0.0; T(7): 0.0                                                                                                              | 0.77 | -1.00 |
| Aak1     | Q3UHJ0-2 | ILSDVTHSAVFGVPASK                             | S(3): 4.6; T(6): 47.7; S(8): 47.7; S(16): 0.0                                                                                                  | 0.77 | -0.03 |
| Phyhipl  | Q8BGT8   | NLSLEAIQLCDR                                  | S(3): 100.0                                                                                                                                    | 0.77 | 0.30  |
| Fbxl20   | Q9CZV8-4 | VHAYFAPVTPPPSVGGSR                            | Y(4): 0.0; T(9): 100.0; S(13): 0.0; S(17): 0.0                                                                                                 | 0.77 | -0.64 |
| Gm996    | A2AJA9   | SLEQLDELITDLVIDSR                             | S(1): 100.0; T(10): 0.0; S(16): 0.0                                                                                                            | 0.76 | -0.35 |
| Ckb      | Q04447   | RGTGGVDTAAVGGVFDVSNADR                        | T(3): 100.0; T(8): 0.0; S(18): 0.0                                                                                                             | 0.75 | -0.41 |
| Tom1l2   | Q5SRX1   | GIEFPMADLDALSPIHTPQR                          | S(13): 100.0; T(17): 0.0                                                                                                                       | 0.74 | -0.43 |
| Sptbn4   | E9PX29   | QESADHEGPHSLTLGR                              | S(3): 100.0; S(11): 0.0; T(13): 0.0                                                                                                            | 0.73 | -0.82 |
| Usp5     | Q3U4W8   | SAAESISESVPVGPVK                              | S(1): 0.0; S(5): 98.9; S(7): 1.0; S(9): 0.1                                                                                                    | 0.73 | -0.45 |
| Rapgef2  | E9QNQ4   | SLGSLSQGSANATVLDVAQTGGHK                      | S(1): 97.9; S(4): 2.0; S(6): 0.1; S(9): 0.1; T(13): 0.0; T(20): 0.0                                                                            | 0.72 | -0.24 |
| Ptges3   | Q9R0Q7   | DWEDDSDEDMSNFDR                               | S(6): 100.0; S(11): 0.0                                                                                                                        | 0.72 | -0.24 |
| Fxr1     | Q61584-4 | RGPNYTSGYGTNSELSNPSETESER                     | Y(5): 0.0; T(6): 0.0; S(7): 0.0; Y(9): 0.0; T(11): 0.0; S(13): 0.0; S(16): 0.2; S(19): 98.2; T(21): 1.5; S(23): 0.0                            | 0.71 | 0.00  |
| Tcp11l2  | Q8K1H7   | NIRPHIQHHLVEYERNK                             | Y(13): 100.0                                                                                                                                   | 0.70 | -0.12 |
| Tanc1    | E9QAF9   | ADNCSPVAEEETTGSASVLPK                         | S(5): 100.0; T(12): 0.0; T(13): 0.0; S(15): 0.0; S(18): 0.0                                                                                    | 0.70 | 0.19  |
| Dmxl2    | Q8C7U1   | AQLLHALSLDEGGPEPSLSDSSSGGSFGR                 | S(8): 0.8; S(17): 58.2; S(19): 12.6; S(21): 12.6; S(22): 12.6; S(23): 3.0; S(26): 0.2                                                          | 0.69 | -0.93 |
| Tin2     | E9PUM4   | FGLEGDEESTMLEESVSPK                           | S(9): 0.0; T(10): 0.0; S(15): 0.2; S(17): 99.8                                                                                                 | 0.69 | -0.41 |
| Nup85    | Q8R480   | QVIFSAEQTYELMR                                | S(5): 47.3; T(9): 47.3; Y(10): 5.4                                                                                                             | 0.69 | -0.15 |
| Tiam1    | G3UWG2   | SNATNSSYSPTGR                                 | S(1): 0.0; T(4): 0.0; S(6): 1.3; S(7): 0.2; Y(8): 1.3; S(9): 87.3; T(12): 10.0                                                                 | 0.69 | -0.26 |
| Trim3    | Q3TDT0   | ALRPGDLPPSPDDVK                               | S(10): 100.0                                                                                                                                   | 0.68 | -0.73 |
| Milt6    | B1AR09   | HSSGGGGGAGGGSSGGGGSSSAS<br>GGGGGTGGGSGNSFLSGR | S(2): 0.0; S(3): 0.0; S(13): 0.0; S(14): 0.0; S(21): 0.0; S(22): 0.3; S(23): 0.8; S(25): 0.3; T(31): 70.7; S(35): 21.1; S(38): 6.6; S(41): 0.3 | 0.68 | -0.18 |



|          |          |                                          |                                                                                                                                    |      |       |
|----------|----------|------------------------------------------|------------------------------------------------------------------------------------------------------------------------------------|------|-------|
| Gapvd1   | Q6PAR5-6 | EAPWPSAQSEIRTISAYK                       | S(6): 100.0; S(9): 0.0; T(13): 0.0; S(15): 0.0; Y(17): 0.0                                                                         | 0.68 | -0.81 |
| Ube4b    | Q9ES00   | LAGGQTSQPTTPLTSPQR                       | T(6): 0.0; S(7): 0.0; T(10): 0.0; T(11): 0.0; T(14): 50.0; S(15): 50.0                                                             | 0.68 | -0.09 |
| Ldhc     | D3YVR7   | SLNPAIGTDSK                              | S(1): 100.0; T(8): 0.0; S(10): 0.0                                                                                                 | 0.67 | -0.17 |
| Elmo3    | Q8BYZ7-2 | LLESVTLSSPALGQLVK                        | S(4): 4.5; T(6): 45.5; S(8): 45.5; S(9): 4.5                                                                                       | 0.67 | -0.88 |
| Ckb      | Q04447   | RGTGGVDTAAVGGVFDVSNADR                   | T(3): 97.0; T(8): 3.0; S(18): 0.0                                                                                                  | 0.67 | -0.27 |
| Dmwd     | Q08274   | LGDPDGAGEPPSTPSGLGAGGDR                  | S(12): 7.5; T(13): 85.1; S(15): 7.5                                                                                                | 0.66 | -0.20 |
| Atp6v0a2 | P15920-2 | KDSEEEVSLLNQDIEEGNSR                     | S(3): 100.0; S(8): 0.0; S(20): 0.0                                                                                                 | 0.66 | -0.27 |
| Hspa5    | P20029   | LYGSGGPPPTGEEDTSEKDEL                    | Y(2): 0.0; S(4): 0.0; T(10): 0.0; T(15): 50.0; S(16): 50.0                                                                         | 0.66 | -0.01 |
| Pcp2     | P12660   | RNSSPQPQTQAP                             | S(3): 94.4; S(4): 5.6; T(9): 0.0                                                                                                   | 0.66 | -0.40 |
| Arhgap21 | B7ZCJ1   | RNSEGSEASCTEGLTSPSLDSR                   | S(3): 91.9; S(6): 8.1; S(9): 0.0; T(11): 0.0; S(14): 0.0; T(16): 0.0; S(18): 0.0; S(21): 0.0                                       | 0.65 | -0.38 |
| Prune2   | Q52KR3-5 | VAISTVNMTLEVRK                           | S(4): 0.0; T(5): 0.0; T(9): 100.0                                                                                                  | 0.65 | -0.37 |
| Uty      | D6RFT4   | GSEVQSIHK                                | S(2): 0.0; S(6): 100.0                                                                                                             | 0.64 | -0.71 |
| Madd     | A2AGR0   | ATLSDSEIETNSATSAIFGK                     | T(2): 0.1; S(4): 92.1; S(6): 7.8; T(10): 0.0; S(12): 0.0; T(14): 0.0; S(15): 0.0                                                   | 0.63 | -0.67 |
| Ryr2     | E9Q401   | RISQTSQVSDAAHGYSR                        | S(3): 99.6; T(5): 0.4; S(6): 0.0; S(9): 0.0; Y(16): 0.0; S(17): 0.0                                                                | 0.63 | -0.64 |
| Syn1     | O88935   | QTSQQPAGPPAQRPPPGGPPQPGP<br>GPQR         | T(2): 15.6; S(3): 84.4                                                                                                             | 0.62 | -1.67 |
| Rtn4     | Q99P72   | DDSPKEYTDLEVSNK                          | S(3): 100.0; Y(7): 0.0; T(8): 0.0; S(13): 0.0                                                                                      | 0.62 | -0.44 |
| Gprin1   | Q3UNH4   | AETVSPGEVDAMTLGK                         | T(3): 4.6; S(5): 95.4; T(13): 0.0                                                                                                  | 0.61 | -0.41 |
| Tiam1    | G3UWG2   | SNATNSSYSPTGR                            | S(1): 0.0; T(4): 0.0; S(6): 0.9; S(7): 0.1; Y(8): 0.9; S(9): 97.1; T(12): 0.9                                                      | 0.60 | -0.20 |
| Pvrl1    | Q9JKF6   | AGIPQHHPMAQNLQYPDDSDDEK                  | Y(16): 0.7; S(20): 99.3                                                                                                            | 0.60 | -0.69 |
| Sp100    | E9Q4Y0   | GGDTSDESSIIIR                            | T(4): 0.8; S(5): 96.8; T(7): 0.8; S(9): 0.8; S(10): 0.8                                                                            | 0.60 | -0.21 |
| Sltm     | Q8CH25-2 | DVQDAIAQSPEK                             | S(9): 100.0                                                                                                                        | 0.59 | -0.20 |
| Lmtk3    | Q5XJV6   | ALVNGEPMSPAGEK                           | S(9): 100.0                                                                                                                        | 0.59 | -0.53 |
| Map2     | P20357   | ASQSPPAQEAQYSTLAQSYTPDHPSEL<br>PEEPSPQER | S(2): 0.0; S(5): 0.0; Y(13): 0.0; S(14): 0.0; T(15): 0.0; S(19): 0.0; Y(20): 0.0; T(21): 0.0; S(26): 0.0; S(33): 12.1; S(34): 87.9 | 0.58 | 0.09  |
| Pabpc4   | Q6PHQ9   | LAMDFGGAGAAQGLTDCQSGGVPT<br>AVPNLAPR     | T(16): 13.6; S(18): 28.8; S(21): 28.8; T(26): 28.8                                                                                 | 0.58 | -0.59 |
| Pitpnm3  | Q3UHE1-2 | FPAQGSIEIHEDGEEGCSQR                     | S(6): 100.0; S(18): 0.0                                                                                                            | 0.58 | -0.40 |
| Ahdc1    | Q6PAL7   | ANSEASSSEGQSSLSLEK                       | S(3): 91.1; S(6): 8.8; S(7): 0.1; S(8): 0.0; S(12): 0.0; S(13): 0.0; S(15): 0.0; S(16): 0.0                                        | 0.58 | 0.23  |
| Gpsm1    | Q6IR34-3 | AAQSSVTASPQTEEFFDLIASSQSR                | S(4): 0.0; S(5): 0.0; T(7): 8.5; S(9): 83.0; T(12): 8.5; S(21): 0.0; S(22): 0.0; S(24): 0.0                                        | 0.57 | -0.02 |
| Sept_4   | P28661-2 | LTRESGDFPIPAVPPGTDPETEK                  | T(2): 11.1; S(5): 11.1; T(7): 77.9; T(18): 0.0; T(22): 0.0                                                                         | 0.57 | -0.22 |
| Speg     | E9QQ25   | MPSIPEEPHGDLEK                           | S(3): 100.0                                                                                                                        | 0.57 | -0.19 |
| Apba1    | B2RUJ5   | APTGGGHPDPSGLPAPAGQQQR                   | T(3): 0.0; S(11): 100.0                                                                                                            | 0.56 | -0.53 |
| Elmo1    | Q8BPU7   | IAFDAESEPNSSGSMK                         | S(7): 0.0; S(12): 0.0; S(13): 5.8; S(15): 94.2                                                                                     | 0.56 | 0.01  |
| Mobp     | Q9D2P8   | ATSPQRPK                                 | T(2): 50.0; S(3): 50.0                                                                                                             | 0.56 | -0.13 |
| Dmxl1    | Q6PNC0   | ISEASWLPEEHYSSPEK                        | S(2): 0.0; S(5): 0.0; Y(12): 0.0; S(13): 0.6; S(14): 0.6; S(15): 98.9                                                              | 0.55 | -0.42 |
| Slc7a5   | Q9Z127   | AVATPAAAAEEER                            | T(4): 100.0                                                                                                                        | 0.55 | -0.68 |
| Pclo     | Q9QYX7   | SVDTSVQTDDEDQDEWDMPSR                    | S(1): 0.0; T(4): 0.6; S(5): 0.6; T(8): 98.8; S(20): 0.0                                                                            | 0.55 | -0.50 |
| Akt2     | Q60823   | YFDDEFTAQSITITPPDRYDSLPLELDQ<br>R        | Y(1): 0.0; T(7): 0.8; S(10): 96.6; T(12): 0.8; T(14): 0.8; Y(19): 0.8; S(21): 0.0                                                  | 0.54 | -0.15 |
| Bsn      | O88737   | SPQVLYSPVSPSPHR                          | S(1): 0.0; Y(6): 0.0; S(7): 0.0; S(10): 5.6; S(13): 94.4                                                                           | 0.54 | -0.93 |
| Rab12    | P35283   | RPAGGSLGAVSPALSGGQAR                     | S(6): 46.5; S(11): 46.5; S(15): 7.1                                                                                                | 0.54 | -0.13 |
| Hcn2     | O88703   | DSASPGAASGLDPLDSAR                       | S(2): 7.6; S(4): 92.4; S(9): 0.0; S(16): 0.0                                                                                       | 0.54 | -0.47 |
| Rab16    | Q64511   | KTSFDQSDVDIFPDSFTSEPPALPR                | T(2): 0.0; S(3): 0.0; S(8): 100.0; S(15): 0.0; T(18): 0.0; S(19): 0.0                                                              | 0.54 | 0.03  |

|          |          |                                         |                                                                                                              |      |       |
|----------|----------|-----------------------------------------|--------------------------------------------------------------------------------------------------------------|------|-------|
| Epn1     | Q80VP1   | SPGAFDMSGVGGSLAESVGSPPPAATP<br>TPTPPTTR | S(1): 0.0; S(8): 0.2; S(13): 4.0; S(17): 4.0; S(20): 91.5; T(26): 0.2; T(28): 0.0;<br>T(30): 0.0; T(33): 0.0 | 0.54 | -0.17 |
| Pml      | F7BTZ2   | ATSPPHLDGTSNPESTVPEK                    | T(2): 50.0; S(3): 50.0; T(10): 0.0; S(11): 0.0; S(15): 0.0; T(16): 0.0                                       | 0.52 | -0.64 |
| Dpysl2   | O08553   | NLHQSGFSLSGAQIDDNIPR                    | S(5): 49.9; S(8): 49.9; S(10): 0.2                                                                           | 0.52 | -0.43 |
| Prex1    | Q69ZK0   | HPDHTAVQSALQAMK                         | T(5): 0.1; S(9): 99.9                                                                                        | 0.52 | -0.41 |
| Tom1l2   | Q5SRX1   | AAETVPDLPSPTTEAPASNTSTR                 | T(4): 0.0; S(10): 50.0; T(13): 50.0; S(20): 0.0; T(22): 0.0; S(23): 0.0; T(24): 0.0                          | 0.52 | -0.86 |
| Shisa6   | F6VQZ6   | QYNHPILSSATQPTTHEKPR                    | Y(2): 0.0; S(8): 0.0; S(9): 0.0; T(11): 0.0; T(13): 100.0; T(15): 0.0                                        | 0.52 | -0.95 |
| Ranbp2   | Q9ERU9   | NRPGYVSEEEEDDEDYEMAVK                   | Y(5): 0.0; S(7): 100.0; Y(16): 0.0                                                                           | 0.52 | -0.37 |
| Csnk1a1  | E9Q4G7   | AAQQAASSSGGQQQAQTPTGK                   | S(7): 0.0; S(8): 0.0; S(9): 0.0; T(17): 100.0; T(19): 0.0                                                    | 0.52 | -0.40 |
| Fbxo16   | Q9QZM9   | QSPSLAFRSSSSLR                          | S(2): 0.0; S(4): 0.0; S(9): 2.7; S(10): 32.4; S(11): 32.4; S(12): 32.4                                       | 0.51 | -0.72 |
| Ace      | P09470   | GPQFGSEVELR                             | S(6): 100.0                                                                                                  | 0.51 | -0.77 |
| Scap     | Q6GQT6   | RDSCGGGAFETQENWER                       | S(3): 100.0; T(11): 0.0                                                                                      | 0.51 | -0.81 |
| Armc10   | Q9D0L7   | SAEDLTDGSYDDILNAEQLK                    | S(1): 49.4; T(6): 49.4; S(9): 0.6; Y(10): 0.6                                                                | 0.51 | -0.28 |
| Syn1     | O88935   | SQSLTNAFNLPEPAPRPSLSQDEVK               | S(1): 0.0; S(3): 0.0; T(5): 0.0; S(19): 50.0; S(21): 50.0                                                    | 0.51 | -0.14 |
| Phkb     | Q7TSH2   | SGSVYEPLK                               | S(1): 5.8; S(3): 93.8; Y(5): 0.4                                                                             | 0.51 | -0.84 |
| Tmem108  | Q8BHE4   | EIQSLETSEDQLSEPR                        | S(4): 0.0; T(7): 0.0; S(8): 0.1; S(13): 99.9                                                                 | 0.50 | -0.64 |
| Tnks1bp1 | P58871   | SSGSLSPGLETDPEAR                        | S(1): 0.0; S(2): 0.0; S(4): 0.0; S(6): 100.0; T(11): 0.0                                                     | 0.50 | 0.02  |
| Mink1    | Q9JM52-2 | QNSDPTSEGGPSPNPPSWVRPDNEAP<br>PK        | S(3): 95.3; T(6): 2.3; S(7): 2.3; S(13): 0.0; S(18): 0.0                                                     | 0.49 | -0.54 |
| Arfgef3  | Q3UGY8   | VAAPSSSPSAEAEYWR                        | S(5): 0.2; S(6): 0.2; S(7): 49.8; S(9): 49.8; Y(14): 0.0                                                     | 0.49 | -0.40 |
| Lgalsl   | Q8VED9   | LDDGHLNNSLGSVPQADVYFPR                  | S(9): 0.0; S(12): 100.0; Y(19): 0.0                                                                          | 0.49 | 0.18  |
| Amph     | Q7TQF7   | TPSPPEEPSPLPSTASPNHTLAPASPA<br>PVRPR    | T(1): 2.9; S(3): 95.8; S(9): 0.6; S(13): 0.6; T(15): 0.1; S(17): 0.0; T(21): 0.0; S(26):<br>0.0              | 0.49 | -0.29 |
| Ppp1r14a | Q91VC7   | QPGFPQPSDDPSLSPR                        | S(8): 0.0; S(10): 0.0; S(14): 0.6; S(16): 99.4                                                               | 0.49 | 0.03  |
| Tmem163  | Q8C996   | GHAPSTAAPASPAPMSSSVQSDEER               | S(5): 0.0; T(6): 0.0; S(12): 0.0; S(17): 0.0; S(18): 0.0; S(19): 0.0; S(22): 100.0                           | 0.48 | 0.15  |
| Rab3a    | P63011   | MSESLDTADPAVTGAK                        | S(2): 33.3; S(4): 33.3; T(7): 33.3; T(13): 0.0                                                               | 0.47 | -0.41 |
| Prpf40b  | D3Z4N6   | TGWDTSESELSEGELER                       | T(1): 0.0; T(5): 0.0; S(6): 0.0; S(8): 0.0; S(11): 100.0                                                     | 0.46 | -0.01 |
| Sec16a   | A2AIX1   | FTGSFDDDAEHR                            | T(2): 0.2; S(4): 99.8                                                                                        | 0.46 | -0.63 |
| Wdr47    | Q8CGF6   | TSPMSHSFANFHYPGVQNLRSR                  | T(1): 98.9; S(2): 1.1; S(5): 0.0; S(7): 0.0; Y(13): 0.0; S(20): 0.0                                          | 0.46 | -0.28 |
| Bod1l    | E9Q6J5   | TSTPVILEGAQEETDTR                       | T(1): 0.1; S(2): 0.7; T(3): 99.2; T(14): 0.0; T(16): 0.0                                                     | 0.46 | -0.22 |
| Rps28    | G3UYV7   | TGSQGQCTQVR                             | T(1): 0.5; S(3): 99.5; T(8): 0.0                                                                             | 0.46 | -0.47 |
| Rps3     | P62908   | DEILPTTPISEQK                           | T(6): 3.8; T(7): 96.2; S(10): 0.0                                                                            | 0.46 | -0.33 |
| Dbi      | Q4VWZ5   | TQPTDEEMLFYSHFK                         | T(1): 0.0; T(4): 0.0; Y(12): 95.8; S(13): 4.2                                                                | 0.45 | -0.23 |
| Cep76    | Q0VEJ0   | ELNFVTDSDVQELPSSPK                      | T(6): 0.0; S(8): 0.0; S(15): 7.8; S(16): 92.2                                                                | 0.45 | -0.37 |
| Ybx1     | P62960   | NYQQNYQNSSEGEK                          | Y(2): 0.0; Y(6): 0.0; S(9): 99.4; S(11): 0.6                                                                 | 0.45 | -0.60 |
| N4bp3    | A2A699   | TGLCSPEDNSLTPLLDEVAPEGR                 | T(1): 3.3; S(5): 92.8; S(10): 0.7; T(12): 3.3                                                                | 0.45 | -0.16 |
| Prrc2c   | Q3TLH4   | ATSTSPNSQSSK                            | T(2): 0.0; S(3): 0.0; T(4): 0.2; S(5): 99.8; S(8): 0.0; S(10): 0.0; S(11): 0.0                               | 0.45 | -0.26 |
| Egfr     | Q01279   | ELVEPLTPSGEAPNQAHLR                     | T(7): 100.0; S(9): 0.0                                                                                       | 0.45 | -0.18 |
| Tns1     | E9Q0S6   | WDSYDNFSGHR                             | S(3): 99.7; Y(4): 0.3; S(8): 0.0                                                                             | 0.45 | -0.25 |
| Dmtn     | Q9WV69   | LQSTEFSPSGSEAGSPGLQNGEGQR               | S(3): 46.9; T(4): 46.9; S(7): 6.1; S(9): 0.1; S(11): 0.0; S(15): 0.0                                         | 0.45 | -0.27 |
| Arhgef12 | F8VQN6   | SEGVDQAQEPQSLVGPSTR                     | S(1): 0.0; S(12): 10.9; S(16): 67.4; S(18): 10.9; T(19): 10.9                                                | 0.45 | -0.31 |
| Myo5a    | D3YZ62   | RTSSIADEGTYTLDSILR                      | T(2): 48.1; S(3): 48.1; S(4): 3.8; T(10): 0.0; Y(11): 0.0; T(12): 0.0; S(15): 0.0                            | 0.44 | -0.18 |
| Znfx1    | Q8R151   | IQGSAGEISTSQEQLK                        | S(4): 0.1; S(9): 33.3; T(10): 33.3; S(11): 33.3                                                              | 0.44 | 0.01  |
| Gm15800  | E9Q2E4   | TEGTPPPPGQPAK                           | T(1): 0.8; T(4): 99.2                                                                                        | 0.44 | -0.25 |
| Sptbn2   | Q68FG2   | SSEAAHGATLPTR                           | S(1): 100.0; S(2): 0.0; T(9): 0.0; T(12): 0.0                                                                | 0.44 | -0.63 |

|           |          |                                     |                                                                                                         |      |       |
|-----------|----------|-------------------------------------|---------------------------------------------------------------------------------------------------------|------|-------|
| Slc25a46  | Q9CQS4   | SFGSGTELGHVWTPPDIPGSR               | S(1): 0.0; S(4): 0.0; T(6): 0.0; T(13): 0.7; T(14): 99.3; S(21): 0.0                                    | 0,44 | -0,33 |
| Astn1     | Q61137-2 | QLTTISLIIR                          | T(3): 33.3; T(4): 33.3; S(6): 33.3                                                                      | 0,44 | -0,14 |
| Sphkap    | E9PUC4   | QSSTESITEEFYR                       | S(2): 0.0; S(3): 99.7; T(4): 0.3; S(6): 0.0; T(8): 0.0; Y(12): 0.0                                      | 0,44 | -0,09 |
| Nefh      | P19246   | EGAKSPAFAK                          | S(5): 100.0                                                                                             | 0,44 | -0,27 |
| Shank1    | D3YZU5   | HYTVGSYDSFDAPSDYIIK                 | Y(2): 0.1; T(3): 0.7; S(6): 7.4; Y(7): 7.4; S(9): 84.4; S(14): 0.0; Y(16): 0.0                          | 0,44 | -0,77 |
| Ifi44     | Q8BV66   | DMLILSALK                           | S(6): 100.0                                                                                             | 0,44 | -0,27 |
| Arhgef12  | Q8R4H2   | SEGVDQAEQSLVGGSPSTR                 | S(1): 0.0; S(11): 0.0; S(15): 83.9; S(17): 8.0; T(18): 8.0                                              | 0,44 | 0,03  |
| Purb      | O35295   | DSLGDFFIEHYAQLGPSSPEQLAAGAEEGGGPR   | S(2): 0.0; Y(10): 0.0; S(16): 8.3; S(17): 91.7                                                          | 0,43 | -0,05 |
| Hspa12a   | Q8K0U4   | ETAPTSTYSSPAR                       | T(2): 0.0; T(5): 0.0; S(6): 0.0; T(7): 0.0; Y(8): 0.6; S(9): 92.5; S(10): 6.8                           | 0,43 | -0,42 |
| Tgfb1i1   | Q62219-7 | EGCPSPPGQTSK                        | S(5): 88.1; T(10): 6.0; S(11): 6.0                                                                      | 0,43 | -0,18 |
| Eif3b     | Q8JZQ9   | AKPAAQSEETATSPAASPTQSAER            | S(7): 0.0; T(11): 0.0; T(13): 8.7; S(14): 91.3; S(18): 0.0; T(20): 0.0; S(23): 0.0                      | 0,43 | 0,21  |
| Tpr       | Q7M739   | QTPQAPQSPR                          | T(2): 0.0; S(8): 100.0                                                                                  | 0,42 | -0,48 |
| Kcnc1     | E9PVV3   | AALANEDCPHIDQALTPDEGLPFTR           | T(16): 100.0; T(24): 0.0                                                                                | 0,42 | -0,13 |
| Akap1     | O08715   | SESSGNLPSVADTR                      | S(1): 33.3; S(3): 33.3; S(4): 33.3; S(9): 0.1; T(13): 0.0                                               | 0,42 | -0,29 |
| Dclk1     | Q9JLM8   | REESEEGFQIPATITER                   | S(4): 100.0; T(13): 0.0; T(15): 0.0                                                                     | 0,42 | -0,10 |
| Sod1      | P08228   | DGVANVSIEDR                         | S(7): 100.0                                                                                             | 0,42 | -0,05 |
| Sipa1l2   | Q80TE4-2 | EYGSTSSIDR                          | Y(2): 0.5; S(4): 32.0; T(5): 32.0; S(6): 32.0; S(7): 3.6                                                | 0,41 | -0,38 |
| Reps2     | A2AFI8   | SFSVEREPQENNSNYPDEPWR               | S(1): 0.8; S(3): 99.2; S(13): 0.0; Y(15): 0.0                                                           | 0,41 | 0,21  |
| Tmem163   | Q8C996   | GHAPSTAAPAPSPAPMSSSVQSDEER          | S(5): 0.0; T(6): 0.0; S(12): 0.0; S(17): 0.0; S(18): 0.0; S(19): 0.0; S(22): 100.0                      | 0,41 | 0,23  |
| Epb4.111  | A2AUK8   | GPSSQEDESGLDSDPRGACSTPEMPQFESVK     | S(3): 0.0; S(4): 0.0; S(9): 13.1; S(15): 84.3; S(22): 2.2; T(23): 0.4; S(31): 0.0                       | 0,41 | -0,42 |
| Pianp     | Q6P1B3   | QEESSQPLTDLSPAGVTLGAFGDSPTPTPDHEEPR | S(4): 0.0; T(9): 0.0; S(12): 0.0; T(17): 0.0; S(25): 99.5; T(27): 0.3; T(29): 0.3                       | 0,41 | -0,24 |
| Atp1a3    | Q6PIC6   | DVAGDASESALLK                       | S(7): 100.0; S(9): 0.0                                                                                  | 0,41 | 0,24  |
| Rgl3      | Q3UYI5   | EPPPPGSPASPSPGQSPSTK                | S(7): 100.0; S(11): 0.0; S(16): 0.0; S(18): 0.0; T(19): 0.0                                             | 0,41 | -0,16 |
| Rab11fip5 | Q8R361   | GSPSLGASPHHSSTGEEK                  | S(2): 0.0; S(4): 0.0; S(8): 100.0; S(12): 0.0; S(13): 0.0; T(14): 0.0                                   | 0,41 | -0,57 |
| Prkar2a   | Q8K1M3   | RVSVCAETFNPDEEEEDNDPR               | S(3): 100.0; T(8): 0.0                                                                                  | 0,41 | -0,22 |
| Srrm1     | E9QKA4   | RESPPAPKPR                          | S(3): 100.0; S(5): 0.0                                                                                  | 0,41 | 0,16  |
| Ksr2      | M0QW59   | LKPPGTPPPSSR                        | T(6): 100.0; S(10): 0.0; S(11): 0.0                                                                     | 0,41 | -0,60 |
| Dsg2      | O55111   | LDLSIIVTNK                          | S(4): 100.0; T(8): 0.0                                                                                  | 0,41 | 0,00  |
| Ywhae     | P62259   | AAFDDAIAELDTLSEESYK                 | T(12): 0.0; S(14): 100.0; S(17): 0.0; Y(18): 0.0                                                        | 0,41 | 0,01  |
| Zfp292    | Q9Z2U2-2 | LESTENTEVK                          | S(3): 0.0; T(4): 0.1; T(7): 99.9                                                                        | 0,41 | -0,16 |
| Ppapdc3   | Q91WB2   | KASGPSTQPPSSDGAR                    | S(3): 99.3; S(6): 0.7; T(7): 0.0; S(12): 0.0; S(13): 0.0                                                | 0,40 | -0,28 |
| Ep300     | E9PYJ8   | TDGKEEEEQSTSATQSSPAPGQSK            | T(1): 0.0; S(11): 0.0; T(12): 0.0; S(13): 0.2; T(15): 0.0; S(17): 49.4; S(18): 49.4; S(24): 1.0         | 0,40 | -0,52 |
| Kmt2b     | Q64514-2 | LGFTVTVGNNRGIYLR                    | T(4): 50.0; T(6): 50.0; Y(14): 0.0                                                                      | 0,40 | 0,03  |
| Atp1a3    | Q6PIC6   | SPDCTHDNPLETR                       | S(1): 100.0; T(5): 0.0; T(12): 0.0                                                                      | 0,40 | -0,21 |
| Srrm2     | Q8BTI8   | SGTPPRPGSVTNMQADECTATPQR            | S(1): 0.6; T(3): 99.4; S(9): 0.0; T(11): 0.0; T(19): 0.0; T(21): 0.0                                    | 0,40 | -0,02 |
| Gbbp1     | Q6NXH3-3 | SSTFPQTDVLSLSLEAEHR                 | S(1): 0.0; S(2): 0.0; T(3): 0.0; T(7): 0.0; S(11): 0.6; S(12): 7.4; S(13): 92.0                         | 0,40 | -0,45 |
| Map4      | P27546   | DVAPMEEIIVPGNDTTSK                  | T(16): 4.6; T(17): 47.7; S(18): 47.7                                                                    | 0,40 | -0,38 |
| Sfr1      | Q8BP27-2 | ENPPSPHSNSSGK                       | S(5): 100.0; S(8): 0.0; S(10): 0.0; S(11): 0.0                                                          | 0,40 | -0,22 |
| Pik3c2g   | D3Z6L6   | FLGHAQTFGGIK                        | T(7): 100.0                                                                                             | 0,39 | -0,05 |
| Golga3    | P55937-1 | SSTSVVSEVSPSSETDNR                  | S(1): 0.0; S(2): 0.0; T(3): 0.0; S(4): 0.0; S(7): 0.0; S(10): 49.8; S(12): 49.8; S(13): 0.3; T(15): 0.0 | 0,39 | -0,09 |

|          |          |                                        |                                                                                                          |       |       |
|----------|----------|----------------------------------------|----------------------------------------------------------------------------------------------------------|-------|-------|
| Park2    | Q9WVS6   | SHETNASGGDEPQSTSEGSIWESR               | S(1): 10.2; T(4): 89.6; S(7): 0.2; S(14): 0.0; T(15): 0.0; S(16): 0.0; S(19): 0.0; S(23): 0.0            | 0.39  | -0.33 |
| Wipf3    | E9Q2D0   | AQLVSPAPPTK                            | S(5): 100.0; T(11): 0.0                                                                                  | 0.39  | -0.44 |
| Raly     | Q64012-2 | LPAPQEDTASEAGTPQGEVQTR                 | T(8): 0.0; S(10): 0.0; T(14): 100.0; T(21): 0.0                                                          | 0.39  | 0.12  |
| Rph3a    | P47708   | WHQLQENHVSSD                           | S(11): 0.3; S(12): 99.7                                                                                  | 0.39  | -0.14 |
| Tanc1    | E9QAF9   | QQGPPAPANDSDNEEDAPASSLK                | S(12): 100.0; S(21): 0.0; S(22): 0.0                                                                     | 0.39  | -0.31 |
| Gucy1b2  | E9Q6H0   | VGIHTGPVLAVVGDK                        | T(5): 100.0                                                                                              | 0.39  | -0.46 |
| Ctnnd2   | E9QKH8   | DGWSQYHFVASSSTIER                      | S(4): 0.0; Y(6): 0.0; S(11): 25.0; S(12): 25.0; S(13): 25.0; T(14): 25.0                                 | 0.39  | -0.20 |
| Psm4     | O35226-2 | AAAASAAEAGIATPGTEGER                   | S(5): 0.0; T(13): 100.0; T(16): 0.0                                                                      | 0.39  | -0.07 |
| ptplad1  | Q8K2C9   | EGSPETLTNLK                            | S(3): 0.0; T(6): 0.7; T(8): 99.3                                                                         | 0.39  | -0.24 |
| Unc13c   | Q8K0T7   | NAWLSPNDSRELESDLSR                     | S(5): 0.0; S(9): 100.0; S(15): 0.0; S(18): 0.0                                                           | 0.39  | -0.32 |
| Gsk3a    | D3Z7E5   | TSSFAEPGGGGGGGGGGPGGSASGPG<br>GTGGGK   | T(1): 5.2; S(2): 47.4; S(3): 47.4; S(21): 0.0; S(23): 0.0; T(28): 0.0                                    | 0.39  | -0.49 |
| Lhx9     | Q9WUH2-2 | SYFAINHNPDAK                           | S(1): 8.8; Y(2): 91.2                                                                                    | -0.35 | 0.46  |
| Sp9      | Q64HY3   | MATSILGEEPR                            | T(3): 50.0; S(4): 50.0                                                                                   | -0.35 | 0.31  |
| THMS1    | Q8BGW0-4 | EFPTAYDLQIAK                           | T(4): 0.4; Y(6): 99.6                                                                                    | -0.35 | 0.34  |
| Stub1    | Q9WUD1   | LGTGGGGSPDKSPSAQELK                    | T(3): 0.0; S(8): 100.0; S(12): 0.0; S(14): 0.0                                                           | -0.35 | 0.32  |
| Kcnrg    | Q2TUM3-3 | DGALFSFILDFLR                          | S(6): 100.0                                                                                              | -0.35 | 0.57  |
| Ppfa3    | B8QI35   | RGSALGPDEAGGELER                       | S(3): 100.0                                                                                              | -0.35 | 0.48  |
| Farp1    | F8VPU2   | LGAPENSGISTLER                         | S(7): 0.0; S(10): 94.5; T(11): 5.5                                                                       | -0.35 | 0.15  |
| Camsap2  | Q8C1B1   | LNQSSPDNLDTK                           | S(4): 94.4; S(5): 5.6; T(10): 0.0; T(12): 0.0                                                            | -0.35 | 0.16  |
| Lnp      | Q7TQ95   | ADSVNLEPSEESLVTK                       | S(3): 100.0; S(10): 0.0; S(13): 0.0; T(16): 0.0                                                          | -0.35 | 0.09  |
| Picl2    | Q8K394   | EFQVSFQVQK                             | S(5): 100.0                                                                                              | -0.35 | 0.26  |
| Ap3d1    | O54774   | VDIITEEMPENALPSDEDDKDPNDPYR            | T(5): 0.0; S(15): 100.0; Y(26): 0.0                                                                      | -0.35 | 0.71  |
| Nin      | E9Q4S3   | DLYVENAQLLK                            | Y(3): 100.0                                                                                              | -0.35 | 0.32  |
| Sptbn2   | Q68FG2   | LEQSNVPEGPGSGTGEDESSGPR                | S(4): 0.0; S(12): 99.6; T(14): 0.4; S(18): 0.0; S(19): 0.0                                               | -0.35 | -0.10 |
| Slc25a31 | Q3V132   | SDGLIGLYQGFVSVQGIIVYR                  | S(1): 0.0; Y(8): 99.8; S(14): 0.2; Y(21): 0.0                                                            | -0.35 | 0.07  |
| Rims3    | Q80U57   | SSSISGEICGSQQAGGGAGTTAK                | S(1): 0.4; S(2): 47.6; S(3): 4.4; S(5): 47.6; S(11): 0.0; T(20): 0.0; T(21): 0.0; T(22): 0.0             | -0.36 | 0.37  |
| Sde2     | Q8K1J5   | EDGIDAVEVAADRPGSPR                     | S(16): 100.0                                                                                             | -0.36 | 0.25  |
| Rtn4     | Q99P72   | LSASPQEVGKPYLESFQPNLHITK               | S(2): 0.0; S(4): 100.0; Y(12): 0.0; S(15): 0.0; T(23): 0.0                                               | -0.36 | -0.03 |
| Ili16    | O54824   | SASPETPASP GK                          | S(1): 0.9; S(3): 98.2; T(6): 0.9; S(9): 0.0                                                              | -0.36 | 2.20  |
| Map4     | P27546   | DMSPSAETEAPLAK                         | S(3): 100.0; S(5): 0.0; T(8): 0.0                                                                        | -0.36 | 0.33  |
| Nlgn2    | Q69ZK9   | RLSPPGSGSGVPGGPLLPTAGR                 | S(3): 100.0; S(8): 0.0; S(10): 0.0; T(21): 0.0                                                           | -0.36 | 0.24  |
| Sparcl1  | P70663   | AAGSKEHIPHTEQQDQEGK                    | S(4): 100.0; T(11): 0.0                                                                                  | -0.36 | 0.30  |
| Slc1a3   | P56564   | DVEMGNSVIEENEMK                        | S(7): 100.0                                                                                              | -0.36 | -0.02 |
| Nfia     | Q02780-2 | SVEDEMDSPGEEPFYTGQGR                   | S(1): 0.0; S(8): 100.0; Y(15): 0.0; T(16): 0.0                                                           | -0.36 | 0.22  |
| Marcks   | P26645   | VNGDASPAEAEPGAK                        | S(6): 100.0                                                                                              | -0.36 | 0.79  |
| Hnrmpa3  | A2AL12   | SSGSPYGGYGSGGGSGGYGSR                  | S(1): 49.8; S(2): 49.8; S(4): 0.3; Y(6): 0.0; Y(10): 0.0; S(12): 0.0; S(16): 0.0; Y(19): 0.0; S(21): 0.0 | -0.36 | 0.20  |
| Tut1     | Q8R3F9   | LGGQEKSFEEGK                           | S(7): 100.0                                                                                              | -0.36 | 0.35  |
| Tjp2     | Q9Z0U1   | SYHEAYEPDYGGGYSPSYDR                   | S(1): 0.0; Y(2): 0.0; Y(6): 0.0; Y(10): 0.0; Y(14): 0.6; S(15): 98.8; S(17): 0.6; Y(18): 0.0             | -0.37 | -0.01 |
| Hist1h4a | P62806   | TVTAMDVVYALK                           | T(1): 0.0; T(3): 0.0; Y(9): 100.0                                                                        | -0.37 | -0.27 |
| Cd209c   | D6RJ18   | VQQLGSLDEEHLIPSGTR                     | S(6): 100.0; S(15): 0.0; T(17): 0.0                                                                      | -0.37 | 0.19  |
| Gabbr2   | Q80T41   | TCKDPIEDINSPEHIQR                      | T(1): 0.0; S(11): 100.0                                                                                  | -0.37 | -0.01 |
| Dagla    | Q6WQJ1   | LLSPVAAASAAR                           | S(3): 100.0; S(9): 0.0                                                                                   | -0.37 | -0.12 |
| Arhgap35 | Q91YM2   | TSFVSGSDELGPIR                         | T(1): 0.0; S(2): 0.0; S(4): 0.0; S(7): 100.0                                                             | -0.37 | 0.56  |
| Izumo4   | D3Z690   | TTPAFLSQNIK                            | T(1): 50.0; T(2): 50.0; S(7): 0.0                                                                        | -0.37 | -0.05 |
| Sash1    | F8VQK5   | SCETLEGPEPVESWPR                       | S(1): 100.0; T(4): 0.0; S(13): 0.0                                                                       | -0.37 | 0.30  |
| Gm2933   | Q1LZ15   | LMYVLALSSDLLVIQK                       | Y(3): 90.2; S(8): 9.7; S(9): 0.1                                                                         | -0.37 | 0.43  |
| Trim28   | Q62318   | RPAASSAAAASAAASPAGGGGEAQEL<br>LEHCGVCR | S(5): 0.0; S(6): 0.0; S(11): 0.0; S(15): 50.0; S(16): 50.0                                               | -0.37 | 0.77  |

|          |          |                                           |                                                                                                   |       |       |
|----------|----------|-------------------------------------------|---------------------------------------------------------------------------------------------------|-------|-------|
| Rplp2    | P99027   | KEESEESDDDMGFGLFD                         | S(4): 50.0; S(7): 50.0                                                                            | -0,37 | 0,18  |
| Pnpo     | Q91XF0   | GLATGDSPLGPMTHHGEEDWVYER                  | T(4): 50.0; S(7): 50.0; T(13): 0.0; Y(22): 0.0                                                    | -0,38 | 0,28  |
| Trim28   | E9Q6J5   | GSDDVLVSGEVPECEVGHMSPR                    | S(2): 0.0; S(8): 0.0; S(20): 100.0                                                                | -0,38 | -0,07 |
| Acot11   | Q8VHQ9   | KSISHPESGDPPTMAEGEGYR                     | S(2): 50.0; S(4): 50.0; S(8): 0.0; T(13): 0.0; Y(20): 0.0                                         | -0,38 | -0,01 |
| Unc13c   | Q8K0T7   | RPSQPASSTPEK                              | S(3): 0.0; S(8): 0.0; S(9): 0.6; T(10): 99.4                                                      | -0,38 | 0,35  |
| Pkp4     | Q68FH0   | DGWNQNHFITPVSTLER                         | T(10): 100.0; S(13): 0.0; T(14): 0.0                                                              | -0,38 | 0,36  |
| Rnf20    | Q5DTM8   | ALVVPEPEPDSNSQER                          | S(11): 0.5; S(13): 99.5                                                                           | -0,38 | 0,20  |
| Npm1     | Q61937   | CGSGPVHISGQHLVAVEEDAEESEDEDE<br>EDVK      | S(3): 0.0; S(9): 0.0; S(22): 100.0                                                                | -0,38 | -0,08 |
| Pde4b    | B1AWC9   | QNDVEIPSPTQK                              | S(8): 96.0; T(10): 4.0                                                                            | -0,38 | 0,10  |
| Park2    | Q9WVS6   | SHETNASGGDEPQSTSEGSIWESR                  | S(1): 1.6; T(4): 96.8; S(7): 1.6; S(14): 0.0; T(15): 0.0; S(16): 0.0; S(19): 0.0;<br>S(23): 0.0   | -0,38 | 0,10  |
| Oxr1     | Q4KMM3   | ESLPIELDQLSGR                             | S(2): 0.0; S(11): 100.0                                                                           | -0,38 | -0,10 |
| Pkp4     | Q68FH0   | AEQYPGSPDSWV                              | Y(4): 0.0; S(7): 100.0; S(10): 0.0                                                                | -0,39 | -0,23 |
| Map2     | P20357   | DGSPDPATPEKEEVAFSEYK                      | S(3): 100.0; T(9): 0.0; S(18): 0.0; Y(20): 0.0                                                    | -0,39 | 0,54  |
| Plekha6  | Q7TQG1   | SIHEVDISNLEAALR                           | S(1): 100.0; S(8): 0.0                                                                            | -0,39 | -0,07 |
| Mgrn1    | Q9D074   | ESSSPESFGTEEGDEPSLK                       | S(2): 1.2; S(3): 9.6; S(4): 79.4; S(7): 9.6; T(10): 0.2; S(17): 0.0                               | -0,39 | 0,26  |
| Mink1    | Q9JM52-2 | QNSDPTSEGGPSPNPPSWVRPDNEAP<br>PK          | S(3): 99.7; T(6): 0.3; S(7): 0.0; S(13): 0.0; S(18): 0.0                                          | -0,39 | 0,50  |
| Gja1     | P23242   | MGQAGSTISNSHAQPFDFPDSQNAK                 | S(6): 25.0; T(7): 25.0; S(9): 25.0; S(11): 25.0; S(22): 0.0                                       | -0,39 | 0,16  |
| Trappc10 | F8VQF9   | RQESGSLEPPSGLALEDGAHVLR                   | S(4): 33.3; S(6): 33.3; S(7): 33.3; S(12): 0.0                                                    | -0,39 | 0,07  |
| Pcif1    | P59114   | QLSEEQPSGNGVK                             | S(3): 100.0; S(8): 0.0                                                                            | -0,40 | 0,08  |
| Aatk     | B1AZF9   | AVSFFDDVTVYLFQESPTR                       | S(3): 0.0; T(9): 0.0; Y(11): 0.0; S(17): 50.0; T(19): 50.0                                        | -0,40 | 0,06  |
| Atp1a2   | Q6PIE5   | CIELSCGSR                                 | S(5): 0.0; S(8): 100.0                                                                            | -0,40 | 0,07  |
| Bag6     | Q3UF95   | ENASPAPGTTAEEMSR                          | S(4): 100.0; T(9): 0.0; T(10): 0.0; S(16): 0.0                                                    | -0,40 | 0,30  |
| Mobp     | Q9D2P8   | HQPAASPVVVR                               | S(6): 100.0                                                                                       | -0,40 | 0,08  |
| Ctnd2    | E9QKH8   | TSTAPSSPGVDSVPLQR                         | T(1): 0.0; S(2): 0.0; T(3): 0.0; S(6): 50.0; S(7): 50.0; S(12): 0.0                               | -0,40 | 0,16  |
| Mltf6    | B1AQX9   | EVSGPNETSSPGSEKPSGSR                      | S(3): 0.0; T(8): 33.2; S(9): 33.2; S(10): 33.2; S(13): 0.3; S(17): 0.0; S(19): 0.0                | -0,40 | 0,44  |
| Fam195b  | Q3UGS4   | SPTNSSEIFTPAHEENVR                        | S(1): 100.0; T(3): 0.0; S(5): 0.0; S(6): 0.0; T(10): 0.0                                          | -0,40 | 0,25  |
| Gdf7     | P43029-2 | TALAGTRGAQSGGGGGGGGGGGGGGGG<br>GGGGGGGAGR | T(1): 9.5; T(6): 3.5; S(12): 87.0                                                                 | -0,40 | 0,22  |
| Bsn      | O88737   | TLPSPPPEEAHLPLAGQVPSQLYAASLL<br>QR        | T(1): 0.9; S(4): 99.1; S(20): 0.0; Y(23): 0.0; S(26): 0.0                                         | -0,40 | 0,31  |
| H2afy2   | Q8CCK0   | EGTSNSTSEDGPGDGFILSSK                     | T(3): 20.0; S(4): 20.0; S(6): 20.0; T(7): 20.0; S(8): 20.0; T(17): 0.0; S(20): 0.0;<br>S(21): 0.0 | -0,41 | 0,44  |
| Naf1     | Q3UMQ8   | NDQEPPEVLDVDFSDDEKEK                      | S(13): 100.0                                                                                      | -0,41 | 0,41  |
| Nck1     | Q99M51   | KPSVPDTASPADDSFVDPGER                     | S(3): 0.0; T(7): 0.1; S(9): 99.9; S(14): 0.0                                                      | -0,41 | 0,23  |
| Hnmpc    | Q9Z204-2 | SAAEMYGSSFDLDYDFQR                        | S(1): 0.0; Y(6): 0.0; S(8): 0.9; S(9): 99.1; Y(14): 0.0                                           | -0,41 | 0,57  |
| Lppr4    | Q7TME0   | MSLQVMDTEPEGQSPPR                         | S(2): 0.0; T(8): 0.0; S(14): 100.0                                                                | -0,41 | 0,11  |
| Bsn      | O88737   | LYSSMSDTNLAEAGLNYHAQR                     | Y(2): 48.0; S(3): 48.0; S(4): 0.3; S(6): 3.7; T(8): 0.0; Y(17): 0.0                               | -0,41 | -0,14 |
| Cstf2t   | Q8C7E9   | QGGGQPSSFSPGQSQTVPQDQEK                   | S(7): 0.0; S(8): 0.0; S(10): 99.9; S(14): 0.0; T(17): 0.0                                         | -0,41 | 1,02  |
| Gtf3c1   | Q8K284-2 | VAASPRPGAEEQAEQAQAQLAAPEDA<br>DAGGPR      | S(4): 100.0                                                                                       | -0,41 | 0,63  |
| Top2b    | Q64511   | FDSNEEDTASVFAPSFGLK                       | S(3): 100.0; T(8): 0.0; S(10): 0.0; S(15): 0.0                                                    | -0,42 | 0,44  |
| Srrm2    | Q8BTI8   | SPVPSAFSDQSR                              | S(1): 100.0; S(5): 0.0; S(8): 0.0; S(11): 0.0                                                     | -0,42 | 0,23  |
| Inpp5f   | Q8CDA1   | SPSADSIHTR                                | S(1): 100.0; S(3): 0.0; S(6): 0.0; T(9): 0.0                                                      | -0,42 | 0,33  |
| Zfp2     | Q8CCH7   | SSPEVSFER                                 | S(1): 0.4; S(2): 99.6; S(6): 0.0                                                                  | -0,42 | 0,16  |
| Caskin2  | Q8VHK1   | VGLSPDSPAGDRNSVSGSESVGSIR                 | S(4): 99.0; S(7): 1.0; S(14): 0.0; S(17): 0.0; S(20): 0.0; S(23): 0.0                             | -0,42 | 0,26  |
| Brsk1    | Q5RJI5   | SSGGTPLHSPLHTPR                           | S(1): 0.0; S(2): 0.0; T(5): 0.0; S(9): 100.0; T(13): 0.0                                          | -0,42 | 0,17  |
| Cacna1a  | P97445   | EMGTDGYSDSEHYLPMEGQTR                     | T(4): 0.3; Y(7): 49.7; S(8): 49.7; S(10): 0.3; Y(13): 0.0; T(20): 0.0                             | -0,42 | 0,42  |



|           |          |                                     |                                                                                                                       |       |       |
|-----------|----------|-------------------------------------|-----------------------------------------------------------------------------------------------------------------------|-------|-------|
| Phf3      | B2RQG2   | NTVDIVDKPENSPQR                     | T(2): 0.0; S(12): 100.0                                                                                               | -0.42 | 0.49  |
| Arhgap21  | B7ZCJ1   | DQGEVPSPSEDEPFWSWPGPK               | S(7): 100.0; S(9): 0.0; S(15): 0.0                                                                                    | -0.42 | -0.07 |
| Bag6      | Q3UF95   | ENASPAPGTTAEEMSRS                   | S(4): 99.9; T(9): 0.1; T(10): 0.0; S(16): 0.0                                                                         | -0.43 | -0.15 |
| Trank1    | Q8BV79   | AEQAGSPLLSK                         | S(6): 98.4; S(10): 1.6                                                                                                | -0.43 | 0.12  |
| Arfgap1   | Q9EPJ9-2 | RSSDSWDVWVWGSASNNK                  | S(2): 33.3; S(3): 33.3; S(5): 33.3; S(11): 0.0; S(13): 0.0; S(15): 0.0                                                | -0.43 | 0.93  |
| Epn2      | Q8CHU3   | AGGSPASYHGSTSPR                     | S(4): 100.0; S(7): 0.0; Y(8): 0.0; S(11): 0.0; T(12): 0.0; S(13): 0.0                                                 | -0.43 | 0.00  |
| Kcnj13    | P86046   | DGHSTLQMDGAQR                       | S(4): 50.0; T(5): 50.0                                                                                                | -0.44 | -0.18 |
| Mier1     | Q5UAK0-4 | APSPPTASNSSNSQSEK                   | S(3): 0.8; T(7): 90.7; S(9): 8.5; S(11): 0.0; S(12): 0.0; S(14): 0.0; S(16): 0.0                                      | -0.44 | 0.89  |
| Vat11     | Q80TB8   | TPTPLMANDSTETSEAGEEEEEDHEGDS<br>ENK | T(1): 0.0; T(3): 2.0; S(10): 2.0; T(11): 2.0; T(13): 12.5; S(14): 81.4; S(27): 0.0                                    | -0.44 | 0.09  |
| Fam169a   | Q5XG69   | SQSEEQSEASSEHLEQFTQSAEK             | S(1): 0.0; S(3): 1.1; S(7): 9.1; S(10): 9.1; S(11): 80.5; T(18): 0.1; S(20): 0.0                                      | -0.44 | 0.64  |
| Krt15     | Q61414   | EVASNTEMIQTSK                       | S(4): 0.0; T(6): 0.0; T(11): 1.0; S(12): 99.0                                                                         | -0.44 | 0.61  |
| Rps6kc1   | Q8BLK9-2 | GVDLLLEGVQGESSPTR                   | S(13): 49.9; S(14): 49.9; T(16): 0.2                                                                                  | -0.44 | 0.35  |
| Spag7     | Q7TNE3   | EFAPSDEELDSYR                       | S(5): 100.0; S(11): 0.0; Y(12): 0.0                                                                                   | -0.45 | 0.37  |
| Mroh2a    | F5H8M8   | CLGSLQQVSSSAMAEGMEALTK              | S(4): 0.0; S(10): 0.1; S(11): 3.5; S(12): 3.5; T(22): 93.0                                                            | -0.45 | 0.42  |
| CR025     | Q8BH50   | RDSSSQLASTESDKPTTGR                 | S(3): 50.0; S(4): 50.0; S(6): 0.0; S(10): 0.0; T(11): 0.0; S(13): 0.0; T(17): 0.0;<br>T(18): 0.0                      | -0.45 | 0.92  |
| Slc12a4   | Q9JIS8   | LESLYSDEEEESVAGADK                  | S(3): 3.5; Y(5): 48.3; S(6): 48.3; S(12): 0.0                                                                         | -0.45 | 0.15  |
| Dclk1     | Q9JLM8   | SKSPASTSSVNGTPGSQLSTPR              | S(1): 49.2; S(3): 49.2; S(6): 0.5; T(7): 0.5; S(8): 0.5; S(9): 0.0; T(13): 0.0; S(16):<br>0.0; S(19): 0.0; T(20): 0.0 | -0.46 | -0.06 |
| Sparcl1   | P70663   | AEKPSALNSEETHEQSTEQDK               | S(5): 33.3; S(9): 33.3; T(13): 33.3; S(17): 0.0; T(18): 0.0                                                           | -0.46 | 0.39  |
| Abca8b    | Q8K440-2 | ELTESHAEIIR                         | T(3): 15.1; S(5): 84.9                                                                                                | -0.46 | 0.66  |
| Dnajc6    | Q80TZ3   | GASSPDMEPSYGGGLFDMVK                | S(3): 0.4; S(4): 99.6; S(10): 0.0; Y(11): 0.0                                                                         | -0.46 | -0.04 |
| Akt1      | P31750   | SGSPSDNSGAEEMEVSLAKPK               | S(1): 0.0; S(3): 99.0; S(5): 0.9; S(8): 0.0; S(16): 0.0                                                               | -0.46 | 0.13  |
| Caskin1   | Q6P9K8-2 | SVSESSPGDSPVKPEGSSGAAR              | S(1): 0.0; S(3): 0.0; S(5): 0.0; S(6): 0.0; S(10): 100.0; S(18): 0.0; S(19): 0.0                                      | -0.46 | 0.29  |
| Arhgap12  | B2RUJ8   | IQQDSESGDELSSSSTEQMR                | S(5): 0.0; S(7): 100.0; S(12): 0.0; S(13): 0.0; S(14): 0.0; S(15): 0.0; T(16): 0.0                                    | -0.46 | 0.33  |
| Serpinb6a | F8WIV2   | LTIMDPLQEANGTFALNLLK                | T(2): 50.0; T(13): 50.0                                                                                               | -0.46 | -0.01 |
| Prkar2b   | P31324   | RASVCAEAYNPDEEEDDAESR               | S(3): 95.2; Y(9): 4.8; S(20): 0.0                                                                                     | -0.46 | 0.81  |
| Pkp4      | Q68FH0   | VGSPPLTLTDAQTR                      | S(3): 100.0; T(6): 0.0; T(8): 0.0; T(12): 0.0                                                                         | -0.46 | 0.05  |
| Vmn2r3    | E9Q107   | YLIGIAGGSTMLAGAR                    | Y(1): 0.6; S(11): 73.5; T(12): 13.0; S(14): 13.0                                                                      | -0.46 | -0.04 |
| Mtmr2     | Q9Z2D1   | ASSPAQCVPVQTVV                      | S(2): 50.0; S(3): 50.0; T(9): 0.0; T(13): 0.0                                                                         | -0.47 | 0.13  |
| Sparcl1   | P70663   | AAGSKEHIPHTEQQDQEGK                 | S(4): 100.0; T(11): 0.0                                                                                               | -0.47 | 0.34  |
| Polr2a    | P08775   | YSPTSPTYSPTSPK                      | Y(1): 0.5; S(2): 0.5; T(4): 98.6; S(5): 0.5; T(7): 0.0; Y(8): 0.0; S(9): 0.0; T(11): 0.0;<br>S(12): 0.0               | -0.47 | 0.30  |
| Anks1b    | Q8BIZ1   | NSSTGPTPDCSPSPDPTALK                | S(2): 0.0; S(3): 0.0; T(4): 0.0; T(7): 0.0; S(11): 0.0; S(14): 100.0; T(17): 0.0                                      | -0.48 | 0.18  |
| Znf598    | Q80YR4-2 | YLDNDELLK                           | Y(1): 100.0                                                                                                           | -0.48 | 0.48  |
| Map1a     | Q9QYR6   | MASPPPSGPPSAAHTPFHQSPVEEK           | S(3): 11.2; S(7): 11.2; S(11): 77.5; T(15): 0.0; S(20): 0.0                                                           | -0.48 | 0.22  |
| Fam131b   | Q3TY60-2 | KVSDVTSSGVQSFDEEEGDANN              | S(3): 0.0; T(6): 0.0; S(7): 0.0; S(8): 0.0; S(12): 100.0                                                              | -0.48 | 0.72  |
| Nfia      | Q02780-2 | LKSVEDEMDSPGEEPFYTGQGR              | S(3): 100.0; S(10): 0.0; Y(17): 0.0; T(18): 0.0                                                                       | -0.48 | -0.32 |
| Skiv2l    | Q6NZR5   | LLEPLDLGGDEDEGEAAGGPR               | S(8): 100.0                                                                                                           | -0.49 | -0.08 |
| Pbxip1    | Q3TVI8   | GREPSSQPVPVVDVEDQAK                 | S(5): 91.8; S(6): 7.6; S(7): 0.7                                                                                      | -0.49 | 0.33  |
| Atp1a1    | Q8VDN2   | VDNSSLTGESEPTQTRSPDFTNENPLETR       | S(4): 0.0; S(5): 0.0; T(7): 0.0; S(10): 0.0; T(14): 0.1; S(16): 99.7; T(20): 0.1; T(27):<br>0.0                       | -0.49 | 0.85  |
| Cnksr3    | Q8BMA3   | KGSESPNSFLDQESQR                    | S(3): 0.0; S(5): 100.0; S(8): 0.0; S(14): 0.0                                                                         | -0.49 | 0.15  |
| Pds5b     | Q4VA53-3 | LDSSSEMDHSENYTMSPLPGK               | S(3): 0.1; S(4): 0.7; S(9): 99.2; Y(14): 0.0; T(15): 0.0; S(17): 0.0; S(18): 0.0                                      | -0.50 | 0.12  |

|                                        |          |                                  |                                                                                                                                                                       |       |       |
|----------------------------------------|----------|----------------------------------|-----------------------------------------------------------------------------------------------------------------------------------------------------------------------|-------|-------|
| Lurap1                                 | Q9D6I9   | GSWDSLPTDSSTDR                   | S(2): 0.2; S(5): 99.7; T(9): 0.0; S(10): 0.0; S(11): 0.0; T(12): 0.0                                                                                                  | -0.50 | 0.43  |
| Gtpbp1                                 | O08582   | SRSPVDSVPASMFAPESPSPAAR          | S(1): 1.0; S(3): 99.0; S(7): 0.0; S(12): 0.0; S(19): 0.0; S(20): 0.0                                                                                                  | -0.50 | 0.78  |
| Ppp1r1b                                | Q60829   | AVQHLQTISNLSENQASEEDELGELR       | T(7): 0.0; S(9): 0.0; S(12): 0.0; S(17): 100.0                                                                                                                        | -0.51 | 0.27  |
| Ywhaz                                  | P63101   | TAFDEAIAELDTLSEESYK              | T(1): 0.0; T(12): 0.1; S(14): 99.7; S(17): 0.1; Y(18): 0.1                                                                                                            | -0.51 | 0.55  |
| Sptbn1                                 | Q62261   | AQTLPTS SVVTTITSESSPGKR          | T(3): 0.0; T(6): 0.0; S(7): 0.0; T(10): 0.0; T(12): 0.2; S(13): 33.3; S(15): 33.3; S(16): 33.3                                                                        | -0.51 | 0.39  |
| Srgap1                                 | Q91Z69   | RPGHGSLTNISR                     | S(6): 100.0; T(8): 0.0; S(11): 0.0                                                                                                                                    | -0.52 | -0.16 |
| Psm2                                   | Q8VDM4   | DKTPVQSQPSATTPSGADEK             | T(3): 0.0; S(7): 0.0; S(11): 0.0; T(13): 49.9; T(14): 49.9; S(16): 0.3                                                                                                | -0.52 | 0.24  |
| Sp4                                    | K4DI62   | ENNVSQPASSSSSSSSNNGSSSPTK        | S(5): 0.0; S(9): 0.0; S(10): 0.0; S(11): 0.0; S(12): 0.0; S(13): 0.0; S(14): 0.0; S(15): 0.0; S(16): 0.0; S(17): 0.0; S(21): 0.4; S(22): 6.1; S(23): 87.3; T(25): 6.1 | -0.53 | 0.53  |
| Ppp1r12a                               | Q9DBR7   | STGVSWTQSDENEQER                 | S(1): 0.0; T(2): 0.0; S(5): 0.0; T(8): 0.0; S(11): 100.0                                                                                                              | -0.53 | 0.53  |
| Map1b                                  | P14873   | SQGSTNSNDWMK                     | S(1): 0.0; S(4): 0.0; T(5): 0.1; S(6): 50.0; S(8): 50.0                                                                                                               | -0.53 | 0.52  |
| Sphkap                                 | E9PUC4   | NPHHTLNYDSNER                    | T(5): 1.4; Y(8): 97.2; S(10): 1.4                                                                                                                                     | -0.53 | 0.23  |
| Transmembrane protein C15orf27 homolog | Q8BZB3   | ALDPAPLAQPTPLG SVQT SPELEHR      | T(11): 0.0; S(15): 0.0; T(18): 50.0; S(19): 50.0                                                                                                                      | -0.54 | 0.00  |
| Atn1                                   | O35126   | TEQELPRQPSPDLSDLGR               | T(1): 0.0; S(10): 99.4; S(12): 0.6; S(16): 0.0                                                                                                                        | -0.54 | 0.16  |
| Efr3a                                  | Q8BG67   | LT FYAVSAPEK                     | T(2): 0.3; Y(4): 99.7; S(7): 0.0                                                                                                                                      | -0.55 | 0.44  |
| Irf2bpl                                | Q8K3X4   | NSSSPVSPASVPGQR                  | S(2): 0.0; S(3): 0.6; S(4): 99.3; S(7): 0.1; S(10): 0.0                                                                                                               | -0.55 | 0.46  |
| Phkb                                   | Q7TSH2   | QSSTADAPAEQHEPGITITEWK           | S(2): 47.7; S(3): 47.7; T(4): 4.7; T(17): 0.0; T(19): 0.0                                                                                                             | -0.55 | 0.17  |
| Serp1b6a                               | F8WIV2   | LTIMDPLQEANGTFALNLLK             | T(2): 50.0; T(13): 50.0                                                                                                                                               | -0.55 | 0.21  |
| Svop                                   | Q8BFT9   | TGESARSEDAAASGEHQIEGVR           | T(1): 1.6; S(4): 49.2; S(7): 49.2; S(13): 0.1                                                                                                                         | -0.56 | 0.44  |
| Zswim8                                 | Q3UHH1-3 | KQSAGPNSPTGGGGGGSGGTR            | S(3): 0.0; S(8): 99.8; T(10): 0.2; S(18): 0.0; T(21): 0.0                                                                                                             | -0.56 | 0.92  |
| Vdac1                                  | Q8K284-2 | VAASPRGAEAEQAQAPAQLAAPEDA DAGGPR | S(4): 100.0                                                                                                                                                           | -0.57 | 0.06  |
| Gramd1b                                | Q80TI0   | SRSPTPNQDGD TMVEK                | S(1): 0.0; S(3): 99.5; T(5): 0.5; T(13): 0.0                                                                                                                          | -0.57 | 0.05  |
| Slc4a4                                 | E9Q8N8   | MFSNPDNGSPAMTHR                  | S(3): 0.0; S(9): 99.8; T(13): 0.2                                                                                                                                     | -0.57 | 0.38  |
| Pcsk1n                                 | Q9QXT0   | NGESSELDLQGIR                    | S(4): 100.0; S(5): 0.0                                                                                                                                                | -0.57 | 0.20  |
| Slc6a11                                | P31650   | GSETLGGGGGAAGTR                  | S(2): 100.0; T(4): 0.0; T(15): 0.0                                                                                                                                    | -0.58 | 0.82  |
| Tom1                                   | O88746   | GLEFPMTDLMLSPIHTPQR              | T(7): 0.0; S(13): 100.0; T(17): 0.0                                                                                                                                   | -0.59 | -0.31 |
| Tnrc6c                                 | Q3UHC0   | DSSEATGWEEPPSIR                  | S(2): 0.0; S(3): 0.0; T(6): 0.0; S(12): 99.7; S(15): 0.3                                                                                                              | -0.59 | 0.33  |
| Iltih2                                 | Q61703   | SLPEESGEETDTPVTLYSYK             | S(1): 1.1; S(6): 89.0; T(10): 9.8; T(12): 0.1; T(17): 0.0; Y(19): 0.0; S(20): 0.0; Y(21): 0.0                                                                         | -0.59 | 0.09  |
| Top2b                                  | Q64511   | KTSFDQSDVDIFPSPFTSEPPALPR        | T(2): 0.0; S(3): 0.0; S(8): 100.0; S(15): 0.0; T(18): 0.0; S(19): 0.0                                                                                                 | -0.59 | 0.03  |
| Golga1                                 | Q9CW79-2 | ESVASMADSGDDFASDGSSSR            | S(2): 0.0; S(5): 0.0; S(10): 100.0; S(16): 0.0; S(19): 0.0; S(20): 0.0; S(21): 0.0                                                                                    | -0.59 | 0.60  |
| Rcor1                                  | Q8CFE3   | ERESEDELEETNGSNPVDIEIDPNK        | S(5): 87.4; T(12): 12.6; S(15): 0.1                                                                                                                                   | -0.60 | 0.09  |
| Ctnnd2                                 | E9QKH8   | TGSQHGPQNAATAFQR                 | T(1): 0.0; S(3): 100.0; T(14): 0.0                                                                                                                                    | -0.60 | 0.15  |
| Rtn3                                   | Q9ES97-2 | SEMCENSEQPQAQPETPTQK             | S(1): 0.0; S(7): 0.0; T(16): 89.8; T(18): 10.2                                                                                                                        | -0.60 | 0.86  |
| Akap12                                 | Q9WTQ5   | QAQSSTEIPLQAESGGT EEEAAKDGEENR   | S(4): 33.3; S(5): 33.3; T(6): 33.3; S(14): 0.0; T(18): 0.0                                                                                                            | -0.60 | 0.31  |
| Raly                                   | Q64012-2 | LPAPQEDTASEAGTPQGEVQTR           | T(8): 0.0; S(10): 0.0; T(14): 100.0; T(21): 0.0                                                                                                                       | -0.61 | -0.09 |
| Bsn                                    | O88737   | EPELEMESLTGSPEDR                 | S(8): 4.7; T(10): 47.6; S(12): 47.6                                                                                                                                   | -0.62 | 0.49  |
| Ctbs                                   | Q8R242   | NIIDPTFRASWIAQK                  | T(6): 91.2; S(10): 8.8                                                                                                                                                | -0.62 | 0.31  |
| Pde4d                                  | E9PVU7   | EWYQSTIPQSPAPDDQEEGR             | Y(3): 0.0; S(5): 0.0; T(6): 0.0; S(10): 99.6; S(12): 0.4                                                                                                              | -0.62 | 0.40  |
| Radil                                  | Q69Z89-4 | GTPALTSEAAQSSPPTTR               | T(2): 0.0; T(6): 0.0; S(7): 0.0; S(12): 4.9; S(13): 47.5; T(16): 47.5                                                                                                 | -0.62 | 0.27  |
| Camk4                                  | Q8BGR3   | TVCGTPGYCAPEILR                  | T(1): 99.9; T(5): 0.1; Y(8): 0.0                                                                                                                                      | -0.64 | 0.34  |
| Slc12a5                                | Q91V14   | NKGSPVSSSEGIK                    | S(5): 100.0; S(8): 0.0; S(9): 0.0                                                                                                                                     | -0.64 | 0.27  |
| Stxbp1                                 | O08599-2 | ESSRVSFEDQAPTME                  | S(2): 0.0; S(3): 0.0; S(6): 99.9; T(13): 0.0                                                                                                                          | -0.64 | 0.67  |

|          |          |                                 |                                                                                                                                              |       |       |
|----------|----------|---------------------------------|----------------------------------------------------------------------------------------------------------------------------------------------|-------|-------|
| Tmem200b | D3Z0P8   | SLDLGLGELLGAPATR                | S(1): 100.0; T(16): 0.0                                                                                                                      | -0.65 | -0.20 |
| Jph3     | Q9ET77   | EFSPSFQHR                       | S(3): 100.0; S(5): 0.0                                                                                                                       | -0.66 | 0.26  |
| Atf7ip   | Q7TT18   | NSSTTAAPLGTTLAVQAAPTASIVQATR    | S(2): 4.7; S(3): 4.7; T(4): 4.7; T(5): 11.2; T(11): 29.8; T(12): 11.2; T(20): 11.2; S(23): 11.2; T(28): 11.2                                 | -0.66 | 0.64  |
| Setd1a   | E9PYH6   | SGSPAPETTNEVFPFAQHSSLSR         | S(1): 0.0; S(3): 100.0; T(8): 0.0; T(9): 0.0; S(12): 0.0; S(19): 0.0; S(20): 0.0; S(23): 0.0                                                 | -0.67 | 0.46  |
| Svop     | Q8BFT9   | TGESARSEDDAASGEHQIEGVR          | T(1): 0.0; S(4): 50.0; S(7): 50.0; S(13): 0.0                                                                                                | -0.67 | 0.49  |
| Myo18a   | B2RRE2   | EPADLDPEAASPAYSQAK              | S(11): 74.6; Y(14): 12.7; S(15): 12.7                                                                                                        | -0.67 | 0.17  |
| Cacna1g  | F6RJ39   | APVVLQPEQIVSEETPPPLTK           | S(12): 0.0; T(16): 100.0; T(22): 0.0                                                                                                         | -0.67 | 0.61  |
| Bysl     | O54825   | LGPGLPQDGSDEEEDWPTLEK           | S(10): 100.0; T(19): 0.0                                                                                                                     | -0.68 | 0.38  |
| Vill     | D3Z669   | TVVSVFPGNNK                     | T(1): 93.3; S(4): 6.7                                                                                                                        | -0.68 | 0.05  |
| Samd14   | Q8K070   | DASPPPEASPTIGLDK                | S(3): 100.0; S(9): 0.0; T(11): 0.0                                                                                                           | -0.69 | 0.68  |
| Hspa4l   | P48722   | TGSEHNGPMDGQSGSETSPDPPK         | T(1): 0.0; S(3): 0.0; S(13): 6.6; S(15): 6.6; T(17): 43.4; S(18): 43.4                                                                       | -0.69 | 0.03  |
| Dock4    | P59764   | ASPLLSDK                        | S(2): 100.0; S(6): 0.0                                                                                                                       | -0.73 | 0.59  |
| Pds5b    | Q4VA53-3 | AESPETSVESTQSTPQK               | S(3): 98.9; T(6): 1.0; S(7): 0.1; S(11): 0.0; T(12): 0.0; S(14): 0.0; T(15): 0.0                                                             | -0.74 | -0.05 |
| Vps35    | Q9EQH3   | RESPESEGPYIEGLIL                | S(3): 100.0; S(6): 0.0; Y(11): 0.0                                                                                                           | -0.81 | 0.00  |
| Brd3     | Q8K2F0   | QASASYDSEEEEEGLPMSYDEK          | S(3): 0.5; S(5): 4.6; Y(6): 47.4; S(8): 47.4; S(18): 0.0; Y(19): 0.0                                                                         | -0.84 | -0.04 |
| Nucks1   | Q80XU3   | KVVDYSQFQESDDADEYGR             | Y(5): 0.0; S(6): 0.0; S(11): 100.0; Y(18): 0.0                                                                                               | -0.91 | 0.20  |
| Rgl3     | Q3UYI5   | NREPPPPGSPASPQPSTK              | S(9): 100.0; S(13): 0.0; S(18): 0.0; S(20): 0.0; T(21): 0.0                                                                                  | -0.94 | 0.18  |
| Ccdc40   | Q8BI79-3 | ILQQWTTSLVGMK                   | T(6): 33.3; T(7): 33.3; S(8): 33.3                                                                                                           | -0.95 | -0.20 |
| Efr3b    | Q6ZQ18   | AGIVEVLSEAAIIAATGSGVPTVLEMFNTLR | S(8): 9.3; T(16): 29.2; S(18): 29.2; T(22): 29.2; T(29): 3.2                                                                                 | -0.96 | 0.57  |
| Mtss1    | G3X9H7   | GSDYSWSYQTPSPSTMSR              | S(2): 0.0; Y(4): 0.0; S(5): 0.0; S(7): 0.0; Y(8): 1.4; T(10): 10.0; S(13): 78.3; S(14): 10.0; S(16): 0.2; T(17): 0.0; T(18): 0.0; S(20): 0.0 | -0.96 | 0.87  |
| Apex1    | P28352   | ALGSDHCPITLYLAL                 | S(4): 93.8; T(10): 3.1; Y(12): 3.1                                                                                                           | -1.00 | 0.45  |
| Htt      | P42859   | SLNPQKSGEEEDSGSAAQLGMCNR        | S(1): 0.2; S(7): 99.7; S(13): 0.1; S(15): 0.1                                                                                                | -1.18 | 0.68  |
| Dennd1a  | Q8K382   | TMPSPAETQDPR                    | T(1): 0.1; S(4): 99.9; T(9): 0.0                                                                                                             | -1.29 | -0.22 |
| Arvcf    | P98203-2 | SLAADDEGGPDLEPDYSTATR           | S(1): 100.0; Y(16): 0.0; S(17): 0.0; T(18): 0.0; T(20): 0.0                                                                                  | -1.31 | 0.64  |
| Ptchd3   | Q0EEE2   | GFIQIVDVSSSNK                   | S(9): 25.0; S(10): 25.0; S(11): 25.0; S(12): 25.0                                                                                            | -1.32 | 0.55  |
| Prkcb    | P68404-2 | NIDQSEFEGFSFVNSEFLKPEVK         | S(5): 0.0; S(11): 50.0; S(15): 50.0                                                                                                          | -1.33 | 0.17  |
| Tbx18    | G3X919   | IVSSQGSFLGSSPSGTMTR             | S(3): 0.1; S(4): 0.1; S(7): 2.3; S(11): 43.5; S(12): 43.5; S(14): 9.5; T(16): 0.6; T(18): 0.6                                                | -1.35 | 0.95  |
| Dos      | E9QP85   | LAEPVASSQVLIVAAAAPTSPDHSPA      | S(7): 0.0; S(8): 0.0; T(19): 50.0; S(20): 50.0; S(24): 0.1                                                                                   | -1.37 | 1.51  |
| Fam131b  | Q3TY60-2 | KVSDVTSSGVQSFDEEEGDANN          | S(3): 100.0; T(6): 0.0; S(7): 0.0; S(8): 0.0; S(12): 0.0                                                                                     | -1.38 | 0.87  |
| Atp7b    | B1AQ57   | AIATQVGINK                      | T(4): 100.0                                                                                                                                  | -1.38 | 1.02  |
| Mprip    | P97434-2 | DFASEAPTAPLSDACPLSPHR           | S(4): 0.0; T(8): 0.0; S(12): 0.0; S(18): 100.0                                                                                               | -1.62 | 0.43  |
| Atp1a4   | Q9WV27   | ATTGDASESALLK                   | T(2): 0.0; T(3): 0.0; S(7): 92.5; S(9): 7.5                                                                                                  | -1.94 | 0.42  |

**Supplementary Table S7: Common proteins up and down phosphorylated in hippocampus of Tg(*Dyrk1a*) and Ts65Dn mice, and reverted by L41 treatment.**

| Gene name | Protein Group Accessions | Sequence                       | phosphoRS Site Probabilities                                                                                          | Ts65Dn vs WT | Ts65Dn +/- L41 | TgDyrk1A vs WT | TgDyrk1A +/-L41 |
|-----------|--------------------------|--------------------------------|-----------------------------------------------------------------------------------------------------------------------|--------------|----------------|----------------|-----------------|
| Aak1      | Q3UJH0-2                 | ILSDVTHSAVFGVPASK              | S(3): 0.4; T(6): 93.9; S(8): 5.7; S(16): 0.0                                                                          | 0.59         | -0.02          | 0.59           | -0.63           |
| Aak1      | Q3UJH0-2                 | VQTTTPPTIQGQK                  | T(3): 0.0; T(4): 100.0; T(8): 0.0                                                                                     | -0.70        | 0.27           | 0.42           | -0.18           |
| Ace       | P09470                   | GPQFGSEVELR                    | S(6): 100.0                                                                                                           | 0.65         | -0.44          | -0.67          | 0.17            |
| Aldoa     | P05064                   | GILAADESTGSIK                  | S(8): 0.3; T(9): 5.5; S(11): 94.2                                                                                     | 0.47         | -0.01          | -0.73          | 0.34            |
| Arhgef2   | H3BJU7                   | LQDSSDPDTGSEEEVSSRLSPPHSPR     | S(4): 14.3; S(5): 14.3; T(9): 14.3; S(11): 14.3; S(16): 14.3; S(17): 14.3; S(20): 14.3; S(24): 0.0                    | -0.38        | 1.25           | -1.40          | -0.59           |
| Arhgef2   | H3BJU7                   | LSPPHSPR                       | S(2): 100.0; S(6): 0.0                                                                                                | 1.13         | -1.17          | 0.46           | -0.59           |
| Arhgef28  | G5E8P2                   | LSLPMAAGHGDDAGDGAENILYL        | S(2): 96.9; Y(23): 3.1                                                                                                | 0.64         | -0.23          | -0.51          | 0.37            |
| Basp1     | Q91XV3                   | AEGAGTEEEGTPKESEPQAAADATEVK    | T(6): 0.0; T(11): 100.0; S(15): 0.0; T(24): 0.0                                                                       | -0.56        | 0.36           | -0.29          | 0.83            |
| Basp1     | Q91XV3                   | AEGAGTEEEGTPKESEPQAAADATEVK    | T(6): 1.4; T(11): 97.2; S(15): 1.4; T(24): 0.0                                                                        | 0.11         | 0.04           | -0.63          | 0.57            |
| Basp1     | Q91XV3                   | ETPAASEAPSSAAK                 | T(2): 0.0; S(6): 0.0; S(10): 5.8; S(11): 94.2                                                                         | -1.05        | 0.68           | -0.86          | 0.60            |
| Basp1     | Q91XV3                   | KAEGAGTEEEGTPK                 | T(7): 0.0; T(12): 100.0                                                                                               | -0.73        | 0.36           | -0.53          | 0.20            |
| Basp1     | Q91XV3                   | KAEGAGTEEEGTPKESEPQAAADATEVK   | T(7): 0.3; T(12): 86.6; S(16): 13.1; T(25): 0.0                                                                       | -0.85        | 0.73           | -0.13          | 0.88            |
| Basp1     | Q91XV3                   | KAEGAGTEEEGTPKESEPQAAADATEVK   | T(7): 0.1; T(12): 49.9; S(16): 49.9; T(25): 0.0                                                                       | 0.08         | -0.18          | -1.30          | 1.22            |
| Basp1     | Q91XV3                   | SDAAPAASDSKPSSAEPAPSSK         | S(1): 0.0; S(8): 98.8; S(10): 0.6; S(13): 0.6; S(14): 0.0; S(20): 0.0; S(21): 0.0                                     | 0.31         | -0.02          | -0.48          | 0.54            |
| Bcmo1     | E9Q321                   | YLSQDITYANIEANR                | Y(1): 0.0; S(4): 0.1; T(6): 7.2; Y(7): 92.8                                                                           | -0.93        | 0.73           | 0.56           | -0.28           |
| Bsn       | O88737                   | DACEPESGPDSTVR                 | S(7): 100.0; S(12): 0.0; T(13): 0.0                                                                                   | -0.95        | 0.44           | 0.02           | 0.13            |
| Bsn       | O88737                   | DYLSDELNQLR                    | Y(2): 0.0; S(4): 100.0; S(6): 0.0                                                                                     | -0.31        | 0.03           | -0.25          | 0.47            |
| Bsn       | O88737                   | DYLSDELNQLR                    | Y(2): 0.0; S(4): 99.9; S(6): 0.0                                                                                      | -0.94        | 0.54           | -0.30          | 0.53            |
| Bsn       | O88737                   | EPELEMESLTGSPEDR               | S(8): 0.0; T(10): 93.4; S(12): 6.5                                                                                    | -1.09        | 0.05           | 0.05           | -0.18           |
| Bsn       | O88737                   | HDYVEDSSEGLSPLPPPPAR           | Y(3): 0.8; S(7): 91.2; S(8): 8.0; S(13): 0.0                                                                          | -0.30        | 0.50           | -0.25          | -0.68           |
| Bsn       | O88737                   | SPQVLYSPVSPSPHR                | S(1): 0.0; S(7): 0.0; S(10): 0.2; S(13): 99.8                                                                         | 0.67         | -0.19          | -0.27          | 0.30            |
| Bsn       | O88737                   | SQGSFEYQDTQDHDYGGRR            | S(1): 0.0; S(4): 100.0; Y(7): 0.0; T(10): 0.0; Y(15): 0.0                                                             | -0.64        | 0.31           | -0.20          | -0.06           |
| Bsn       | O88737                   | TLPSPPEEAHLPLAGQVPSQLYAASLLQR  | T(1): 0.0; S(4): 13.3; S(20): 86.4; Y(23): 0.4; S(26): 0.0                                                            | -0.19        | 0.32           | -0.55          | -0.27           |
| C2cd2l    | Q80X80                   | EAGLSQSHDDLNTTATPSVR           |                                                                                                                       | -0.23        | 0.00           | -0.53          | 0.29            |
| C2cd2l    | Q80X80                   | SLSPAATVTAELHYEQGSPR           | S(1): 0.0; S(3): 0.0; T(7): 0.0; T(9): 0.0; Y(14): 0.0; S(18): 100.0                                                  | 1.03         | -0.82          | -0.46          | 0.59            |
| Cacna1a   | P97445                   | EMGTDGYSDEHYLPMEGQTR           | T(4): 24.9; Y(7): 24.9; S(8): 24.9; S(10): 24.9; Y(13): 0.3; T(20): 0.0                                               | -0.68        | 0.27           | 0.27           | -0.23           |
| Cacna1a   | P97445                   | EMGTDGYSDEHYLPMEGQTR           | T(4): 0.0; Y(7): 49.9; S(8): 49.9; S(10): 0.3; Y(13): 0.0; T(20): 0.0                                                 | 0.03         | 0.08           | -0.49          | 0.21            |
| Camkv     | Q3UHL1                   | ATPATEESTVPATQSSALPAK          | T(2): 98.0; T(5): 1.9; S(8): 0.1; T(9): 0.1; T(13): 0.0; S(15): 0.0; S(16): 0.0                                       | -2.18        | 1.91           | -0.29          | -0.32           |
| Camkv     | Q3UHL1                   | SATPATDGRATPATEESTVPATQSSALPAK | S(1): 2.4; T(3): 2.4; T(6): 2.4; T(11): 44.8; T(14): 44.8; S(17): 2.4; T(18): 0.6; T(22): 0.0; S(24): 0.0; S(25): 0.0 | -1.97        | 1.17           | 0.85           | -0.26           |
| Camkv     | Q3UHL1                   | SATPATDGRATPATEESTVPATQSSALPAK | S(1): 0.0; T(3): 0.0; T(6): 0.0; T(11): 98.3; T(14): 1.7; S(17): 0.0; T(18): 0.0; T(22): 0.0; S(24): 0.0; S(25): 0.0  | -1.81        | 1.54           | 0.41           | 0.07            |
| Cep170b   | Q80U49                   | ESPLSPPTVPDPGGATPGSAR          | S(2): 0.6; S(5): 99.4; T(8): 0.0; T(16): 0.0; S(19): 0.0                                                              | -0.32        | 0.24           | -0.46          | 0.36            |
| Cep170b   | Q80U49                   | GSLDWPEEER                     | S(2): 100.0                                                                                                           | -0.58        | 0.00           | -0.63          | 0.29            |
| Cep170b   | Q80U49                   | HEDGTQSDSEDLAK                 | T(5): 33.3; S(7): 33.3; S(9): 33.3                                                                                    | 0.69         | -1.01          | 1.63           | -0.59           |
| Cep170b   | Q80U49                   | HEDGTQSDSEDLAK                 | T(5): 0.8; S(7): 98.5; S(9): 0.8                                                                                      | 0.67         | -0.88          | 1.37           | -0.75           |
| Cep170b   | Q80U49                   | QESFTKEPTSGPPAPGK              | S(3): 93.6; T(5): 6.4; T(9): 0.0; S(10): 0.0                                                                          | -0.81        | 0.27           | -0.75          | 0.63            |
| Chgb      | P16014                   | ADEFPDFYDSEEQMGPHQEANDEK       | Y(8): 1.0; S(10): 99.0                                                                                                | -1.03        | 0.47           | -0.39          | 0.74            |
| Chgb      | P16014                   | EGVDDQESLRPSNQASK              |                                                                                                                       | -0.77        | -0.26          | -0.82          | -0.01           |
| Chgb      | P16014                   | ESKEADVATVR                    | S(2): 100.0; T(9): 0.0                                                                                                | -1.18        | 0.45           | 0.19           | 0.05            |
| Chgb      | P16014                   | SSYEGHPLSEER                   | S(1): 0.0; S(2): 0.0; Y(3): 0.0; S(9): 100.0                                                                          | -0.69        | 0.62           | 0.06           | 0.01            |
| Chgb      | P16014                   | WWQQEEQLGPEESREEVR             | S(13): 100.0                                                                                                          | -1.06        | 0.48           | 0.40           | -0.09           |

|               |        |                                 |                                                                                                             |       |       |       |       |
|---------------|--------|---------------------------------|-------------------------------------------------------------------------------------------------------------|-------|-------|-------|-------|
| Clip2         | Q9Z0H8 | QASGPSSSGAATTVSEKPGPK           | S(3): 82.9; S(6): 8.5; S(7): 8.5; S(8): 0.1; T(12): 0.0; T(13): 0.0; S(15): 0.0                             | -0.95 | 0.81  | -0.39 | 0.35  |
| Clip2         | Q9Z0H8 | TGNESGSNLSDSGSVK                | S(5): 0.0; S(7): 91.1; S(10): 8.9; S(12): 0.0; S(14): 0.0                                                   | 2.08  | -3.05 | -0.69 | -0.06 |
| Clns1a        | Q923F1 | LGEEESKEPLSDEEEDNDDVEPISEFR     | S(5): 50.0; S(10): 50.0; S(24): 0.0                                                                         | -0.77 | 0.73  | 0.56  | -0.28 |
| Col3a1        | P08121 | GENGSPGAPGAPGHPGPPGVPVPSGK      | S(5): 100.0; S(24): 0.0                                                                                     | -0.64 | -0.40 | -0.33 | 0.32  |
| Col3a1        | P08121 | GFPGNPGPPGSPGAAGHQGAIGSPGPAGPR  | S(11): 50.0; S(23): 50.0                                                                                    | -1.52 | 0.06  | 0.33  | 0.60  |
| Col3a1        | P08121 | GPAGPPGPPGASGSPGLQGMPPER        | S(12): 85.8; S(14): 14.2                                                                                    | 0.00  | -0.40 | 0.41  | -0.92 |
| Col3a1        | P08121 | GPAGPPGPPGASGSPGLQGMPPER        | S(12): 50.0; S(14): 50.0                                                                                    | -0.64 | 0.59  | -0.55 | -0.15 |
| Col4a1        | P02463 | GFPGPPGPDGLPGSMGPPGTPSVDHGFLVTR | S(14): 98.9; T(20): 1.1; S(22): 0.0; T(30): 0.0                                                             | 0.96  | -0.64 | 0.58  | -0.29 |
| D430041D05Rik | D3YZ21 | GHSETSTLSSQPSIDEVR              | S(3): 0.5; T(5): 97.7; S(6): 0.5; T(7): 0.5; S(9): 0.5; S(10): 0.5; S(13): 0.0                              | -0.76 | 0.71  | 0.61  | -0.26 |
| Dmtn          | Q9WV69 | DSSVPGSPSSIVAK                  | S(2): 0.0; S(3): 0.0; S(7): 87.7; S(9): 6.1; S(10): 6.1                                                     | -0.74 | 0.13  | -0.12 | 0.04  |
| Dmtn          | Q9WV69 | ESVGGSPQSK                      |                                                                                                             | -0.59 | 0.11  | -0.58 | 0.41  |
| Dmtn          | Q9WV69 | KGAESEEEEEEDDDSEEEIK            | S(14): 100.0                                                                                                | 0.62  | -1.21 | -0.64 | 0.90  |
| Dmtn          | Q9WV69 | LQSTEFSPSGSEAGSPGLQNGEGQR       | S(3): 0.1; T(4): 0.8; S(7): 99.1; S(9): 0.1; S(11): 0.0; S(15): 0.0                                         | 0.39  | -0.27 | 0.43  | -0.05 |
| Dmtn          | Q9WV69 | QRESVGGSPQSK                    | S(4): 100.0; S(8): 0.0; S(11): 0.0                                                                          | -0.45 | 0.08  | -0.15 | 0.45  |
| Dnah7b        | L7N1Y0 | SSDEVVNEVAGDILSK                | S(1): 7.5; S(2): 92.5; S(15): 0.0                                                                           | -0.94 | -0.22 | -0.67 | -0.02 |
| Eif2ak4       | A2AUM0 | EILDGLAYIHEK                    | Y(8): 100.0                                                                                                 | 2.74  | -2.62 | 0.93  | 0.13  |
| Fam169a       | Q5XG69 | GHTENLSPVSK                     |                                                                                                             | -0.77 | 0.19  | -0.27 | -0.33 |
| Fam169a       | Q5XG69 | HFQDSEFSSSQGEDENVAK             | S(5): 0.0; S(8): 6.8; S(9): 86.3; S(10): 6.8                                                                | 0.25  | 0.50  | 0.35  | -0.71 |
| Fam169a       | Q5XG69 | SQSEEQSEASSEHLEQFTQSAEK         | S(1): 0.0; S(3): 0.0; S(7): 0.0; S(10): 33.2; S(11): 33.2; T(18): 33.2; S(20): 0.3                          | -0.59 | 0.15  | -0.44 | 0.00  |
| Fam171a2      | A2A699 | SVEGPGGLEPSLDEYR                | S(1): 100.0; S(11): 0.0; Y(15): 0.0                                                                         | 0.60  | -0.15 | -0.75 | 0.71  |
| Gbf1          | Q6A099 | ADAPDAGAQSDELPSYHQNDVSLDR       | S(10): 49.7; S(12): 49.7; S(16): 0.3; Y(17): 0.3; S(23): 0.0                                                | 0.89  | -0.60 | 1.08  | -0.40 |
| Gm14597       | B1AXE0 | VLAFFVEEDPLSHELK                |                                                                                                             | 0.55  | -0.69 | -0.54 | -0.19 |
| Gpr123        | Q8C4G9 | ALPCPGADQPPYPK                  | Y(12): 100.0                                                                                                | 0.45  | 0.22  | -0.96 | -0.34 |
| Grin2b        | G3X9V4 | QHSYDTFVDLQK                    | S(3): 2.9; Y(4): 97.1; T(6): 0.0                                                                            | -0.25 | 0.02  | 0.47  | -0.09 |
| Grin2b        | G3X9V4 | RQHSYDTFVDLQK                   | S(4): 48.4; Y(5): 48.4; T(7): 3.2                                                                           | 0.88  | -0.69 | 0.06  | -0.02 |
| Habp4         | Q9JKS5 | SLAASGAQQPDSPPGQPQPPGQK         | S(1): 0.0; S(5): 0.0; S(12): 100.0                                                                          | -0.69 | 0.74  | 0.50  | -0.63 |
| Hcn2          | O88703 | RAPPGLPPAASPGPPAASPPAAPSSPR     | S(12): 0.0; S(19): 100.0; S(25): 0.0; S(26): 0.0                                                            | -0.20 | 0.21  | -0.77 | 0.46  |
| Hcn2          | O88703 | RDSASPGAASGLDPLDSAR             | S(3): 8.9; S(5): 91.1; S(10): 0.0; S(17): 0.0                                                               | 0.58  | -0.19 | -0.32 | -0.16 |
| Hepacam       | Q640R3 | STTEPGPPGYSVSPVPGRSPGLPIR       | S(1): 0.0; S(11): 0.0; S(13): 0.0; S(20): 100.0                                                             | 0.49  | -0.07 | 0.65  | -0.36 |
| Hn1           | P97825 | SNSSEASSGDFDLK                  | S(1): 0.0; S(3): 50.0; S(4): 50.0; S(7): 0.0; S(8): 0.0                                                     | 0.92  | -0.66 | 0.46  | -0.03 |
| Hn1           | P97825 | SNSSEASSGDFDLK                  | S(1): 33.3; S(3): 33.3; S(4): 33.3; S(7): 0.0; S(8): 0.0                                                    | -0.70 | 0.52  | 0.20  | -0.17 |
| Hnrnpa0       | Q9CX86 | LFIGGLNVQTSSEGLR                |                                                                                                             | 0.44  | -0.25 | -0.69 | 0.20  |
| Huwe1         | Q7TMY8 | DLSMSEEDQMMR                    | S(3): 91.9; S(5): 8.1                                                                                       | -0.77 | 0.74  | 0.89  | -0.71 |
| Krt26         | Q3TRJ4 | EALSEELTYLQK                    | S(4): 0.0; T(8): 50.0; Y(9): 50.0                                                                           | 0.39  | 0.20  | -0.70 | 0.72  |
| Lmna          | P48678 | ASSHSSSQSGGGSVTK                | S(2): 6.8; S(3): 6.8; S(5): 0.6; S(6): 85.1; S(8): 0.6; S(13): 0.0                                          | -0.64 | 0.14  | -0.94 | 0.00  |
| Lmna          | P48678 | LRLSPSPTSQR                     |                                                                                                             | 0.58  | -0.14 | -0.39 | -0.31 |
| Map1a         | Q9QYR6 | AEEEMEEVHPSDEEEETKAESFYQK       | S(12): 33.3; T(19): 33.3; S(23): 33.3; Y(25): 0.2                                                           | -0.84 | 0.27  | -0.72 | 0.55  |
| Map1a         | Q9QYR6 | APISLQDPSPLNGSTTSCGPDR          | S(4): 0.0; S(6): 0.0; S(10): 100.0; S(16): 0.0; T(17): 0.0; T(18): 0.0; S(19): 0.0                          | -0.90 | 0.49  | 0.13  | -0.30 |
| Map1a         | Q9QYR6 | GEPVPAWEGKSPEQEVV               | S(11): 100.0                                                                                                | -0.79 | 0.40  | -0.08 | 0.02  |
| Map1a         | Q9QYR6 | GFKSPCEDFSVTGESEK               | S(4): 100.0; S(11): 0.0; S(16): 0.0                                                                         | -0.15 | -0.66 | -0.59 | 0.18  |
| Map1a         | Q9QYR6 | SEPQDFQEDSWGDTK                 | S(1): 0.0; S(10): 5.4; T(14): 94.6                                                                          | -0.98 | 0.56  | 0.47  | -0.05 |
| Map1a         | Q9QYR6 | SHWDDGTNDSLEK                   | S(1): 0.0; T(7): 0.0; S(10): 100.0                                                                          | -0.71 | 0.78  | 0.48  | -0.31 |
| Map1a         | Q9QYR6 | SHWDDGTNDSLEK                   | S(1): 0.0; T(7): 0.0; S(10): 100.0                                                                          | -0.72 | 0.28  | 0.09  | -0.05 |
| Map1a         | Q9QYR6 | SPESLSSPAMEDLAMEWGGK            | S(1): 0.0; S(4): 0.3; S(6): 5.0; S(7): 94.7                                                                 | 0.72  | -0.03 | 0.33  | -0.59 |
| Map1a         | Q9QYR6 | SPFEIIPPASPPMETGQR              | S(1): 0.0; S(7): 100.0; S(11): 0.0; T(16): 0.0                                                              | -0.74 | 0.02  | 0.33  | -0.30 |
| Map1a         | Q9QYR6 | SPPCEDFSVTGESEK                 | S(1): 100.0; S(8): 0.0; T(10): 0.0; S(13): 0.0                                                              | -0.41 | 0.15  | 0.71  | -0.21 |
| Map1a         | Q9QYR6 | TEATQGLDYVPSAGTISPTSSLEEDKGFK   | T(1): 0.0; T(4): 0.0; Y(9): 0.0; S(12): 0.0; T(15): 0.2; S(17): 24.9; T(19): 24.9; S(20): 24.9; S(21): 24.9 | -0.99 | 0.89  | 0.30  | 0.45  |



|         |        |                                  |                                                                                               |       |       |       |       |
|---------|--------|----------------------------------|-----------------------------------------------------------------------------------------------|-------|-------|-------|-------|
| Map1a   | Q9QYR6 | VPLSRSPQAQDTLGLAGGQTGCTIQLLPEQDK | S(4): 47.2; S(6): 47.2; T(12): 2.3; S(15): 0.6; T(21): 2.3; T(24): 0.6                        | 0,24  | 0,33  | 0,91  | -0,56 |
| Map1a   | Q9QYR6 | VPSAPGQESVVPDTK                  | S(3): 0.4; S(9): 99.6; T(14): 0.0                                                             | -0,71 | 0,82  | 0,32  | 0,01  |
| Map1a   | Q9QYR6 | WLAESPVGLPPEEEDK                 | S(5): 100.0                                                                                   | -0,08 | -0,09 | -0,45 | -0,58 |
| Map1b   | P14873 | ASLSPMDEPVPDSESPVEK              | S(2): 0.0; S(4): 0.0; S(13): 0.0; S(15): 100.0                                                | -0,18 | 0,40  | 0,82  | -0,09 |
| Map1b   | P14873 | ASLSPMDEPVPDSESPVEK              | S(2): 0.0; S(4): 0.0; S(13): 0.0; S(15): 100.0                                                | -1,00 | 0,29  | -0,19 | 0,17  |
| Map1b   | P14873 | DLTTSSVEK                        | T(3): 0.0; T(4): 5.6; S(5): 88.8; S(6): 5.6                                                   | -0,37 | 0,04  | 3,35  | -2,96 |
| Map1b   | P14873 | DYNASASTISPPSSMEEDK              | Y(2): 0.0; S(5): 0.0; S(7): 0.0; T(8): 0.0; S(10): 100.0; S(13): 0.0; S(14): 0.0              | -0,58 | 0,11  | 0,24  | -0,59 |
| Map1b   | P14873 | DYNASASTISPPSSMEEDK              | Y(2): 0.0; S(5): 0.0; S(7): 0.0; T(8): 0.0; S(10): 100.0; S(13): 0.0; S(14): 0.0              | -0,34 | -0,44 | 0,06  | 0,44  |
| Map1b   | P14873 | DYNASASTISPPSSMEEDK              | Y(2): 0.0; S(5): 0.0; S(7): 0.0; T(8): 0.0; S(10): 99.6; S(13): 0.2; S(14): 0.2               | -0,54 | 0,33  | -0,61 | -0,25 |
| Map1b   | P14873 | DYNASASTISPPSSMEEDKFSK           | Y(2): 0.0; S(5): 0.3; S(7): 11.2; T(8): 11.2; S(10): 77.2; S(13): 0.0; S(14): 0.0; S(21): 0.0 | -0,14 | -0,57 | -0,04 | -0,45 |
| Map1b   | P14873 | EEQSPVKAIEVAEK                   | S(4): 100.0                                                                                   | -0,04 | -0,08 | -0,65 | -0,10 |
| Map1b   | P14873 | ETAAAHQASSPPIDAATAEPYGFGR        | T(2): 0.0; S(9): 33.3; S(10): 33.3; S(11): 33.3; T(18): 0.0; Y(22): 0.0                       | -0,28 | 0,04  | 0,33  | -0,74 |
| Map1b   | P14873 | KLGGDVSPQTIDVVSQGFSGFK           | S(7): 99.9; T(9): 0.1; S(14): 0.0; S(18): 0.0                                                 | -0,12 | 0,42  | -0,37 | 0,58  |
| Map1b   | P14873 | SEQSSMSIEFGQESPEHSLAMDFSR        | S(1): 0.0; S(4): 0.0; S(5): 0.4; S(7): 49.6; S(14): 49.6; S(18): 0.4; S(24): 0.0              | 1,06  | -0,17 | 0,20  | -0,04 |
| Map1b   | P14873 | SQGSTNSDWMK                      | S(1): 0.0; S(4): 93.3; T(5): 5.9; S(6): 0.4; S(8): 0.4                                        | 0,34  | 0,13  | -0,30 | -0,17 |
| Map1b   | P14873 | SVSPGVTQAVVEHCASPEEK             | S(1): 0.0; S(3): 0.0; T(7): 0.0; S(17): 100.0                                                 | -0,35 | 0,18  | 0,09  | -1,19 |
| Map1b   | P14873 | TPEEGGYSYEISEK                   | T(1): 100.0; Y(7): 0.0; S(8): 0.0; Y(9): 0.0; S(12): 0.0                                      | -0,74 | 0,61  | -0,03 | 0,11  |
| Map1b   | P14873 | TTRSPDTSAYCYETMEK                | T(1): 0.2; T(2): 0.2; S(4): 99.5; T(7): 0.0; S(8): 0.0; Y(10): 0.0; Y(12): 0.0; T(14): 0.0    | 0,55  | -0,56 | 0,05  | 0,40  |
| Map2    | P20357 | GSAQESLDTISPKNQHDEK              | S(2): 0.0; S(6): 0.3; T(9): 49.8; S(11): 49.8                                                 | -0,78 | -0,09 | -0,26 | 0,24  |
| Map2    | P20357 | LASVSADAEVAR                     | S(3): 100.0; S(5): 0.0                                                                        | -1,56 | 0,77  | 0,98  | -0,50 |
| Map2    | P20357 | STELGSDYYELSDSR                  | S(1): 0.0; T(2): 0.0; S(6): 0.0; Y(8): 0.0; Y(9): 0.0; S(12): 0.0; S(14): 100.0               | -0,64 | 0,72  | -0,47 | 0,25  |
| Map2    | P20357 | VGSLDNAHHVPGGGNVK                | S(3): 100.0                                                                                   | -0,46 | 0,33  | -0,44 | 0,08  |
| Marcks1 | P28667 | AAATPESQEPQAK                    | T(4): 50.0; S(7): 50.0                                                                        | -0,83 | 0,60  | -0,56 | 0,32  |
| Marcks1 | P28667 | AAATPESQEPQAK                    | T(4): 99.5; S(7): 0.5                                                                         | -0,58 | 0,55  | -0,67 | 0,41  |
| Marcks1 | P28667 | AAATPESQEPQAK                    | T(4): 50.0; S(7): 50.0                                                                        | -0,83 | 0,60  | -0,56 | 0,32  |
| Marcks1 | P28667 | AAATPESQEPQAK                    | T(4): 99.5; S(7): 0.5                                                                         | -0,58 | 0,55  | -0,67 | 0,41  |
| Marcks1 | P28667 | GDVTAEAAAGASPAK                  | T(4): 0.0; S(12): 100.0                                                                       | -0,83 | 0,21  | -0,77 | 0,41  |
| Marcks1 | P28667 | GDVTAEAAAGASPAK                  | T(4): 0.0; S(12): 100.0                                                                       | -0,83 | 0,21  | -0,77 | 0,41  |
| Mccc2   | Q3ULD5 | AYHGDSVARLGTQPDASSTYQENYEQMK     | S(6): 0.0; S(16): 9.7; S(18): 45.1; S(19): 45.1                                               | -1,27 | 0,70  | -0,85 | 0,47  |
| Me1     | P06801 | LFYSVLMSDVEK                     | Y(3): 47.9; S(4): 47.9; S(8): 4.3                                                             | -1,09 | 0,45  | 0,76  | -0,07 |
| Mtdh    | Q80WJ7 | SETNWESPK                        | S(1): 0.0; S(7): 100.0                                                                        | 0,41  | 0,03  | 0,50  | -0,39 |
| Mug2    | P28666 | FDLAFSSEVSGTLQK                  | S(6): 49.8; S(7): 49.8; S(10): 0.3; T(12): 0.0                                                | 0,34  | -0,02 | 1,23  | -0,46 |
| Myo18a  | B2RRE2 | EPADLDPEAASPAYSQAK               | S(11): 100.0; Y(14): 0.0; S(15): 0.0                                                          | -1,03 | 0,39  | 1,09  | -0,22 |
| Nap14   | Q78ZA7 | ASGDGESLDEDEFTLASDFEIGHFFR       | S(2): 0.0; S(7): 100.0; S(12): 0.0; T(15): 0.0; S(18): 0.0                                    | 0,55  | -0,34 | -0,81 | 0,49  |
| Nap14   | Q78ZA7 | EFITGDVEPTDAESAWHSENEEEDK        | T(4): 0.0; T(10): 0.2; S(14): 1.3; S(18): 98.6                                                | -0,29 | -0,03 | -0,52 | 0,39  |
| Ncl     | P09405 | GLSEDTEETLK                      | S(3): 100.0; T(6): 0.0; T(7): 0.0; T(10): 0.0                                                 | -0,73 | -0,30 | 0,16  | -0,07 |
| Ncl     | P09405 | NLSFNITEDELK                     | S(3): 100.0; T(7): 0.0                                                                        | -0,42 | 0,50  | 0,78  | -0,52 |
| Nefh    | P19246 | SPAAVKSPAIAK                     | S(1): 0.0; S(7): 100.0                                                                        | -0,38 | -0,09 | 0,46  | -0,04 |
| Nefh    | P19246 | SPAIAKSPAIAK                     | S(1): 0.0; S(7): 100.0                                                                        | -0,66 | -0,08 | 0,52  | 0,52  |
| Nefh    | P19246 | SPAEPKSPAIAK                     | S(1): 0.0; S(7): 100.0                                                                        | -0,38 | -0,12 | 0,71  | -0,03 |
| Nefh    | P19246 | SPGEAKSPSEAK                     | S(1): 0.0; S(7): 99.6; S(9): 0.4                                                              | -0,78 | 0,02  | 0,40  | 0,34  |
| Nefm    | P08553 | QASHAQLGDAYDQEIR                 | S(3): 100.0; Y(11): 0.0                                                                       | -0,77 | 0,32  | 0,51  | 0,03  |
| Nktr    | P30415 | SRASSSSSHSSK                     | S(1): 0.0; S(4): 0.0; S(5): 0.0; S(6): 0.0; S(7): 1.2; S(8): 1.2; S(11): 87.9; S(12): 9.7     | 0,64  | -0,64 | -0,43 | 1,35  |
| Npnt    | D3YTX1 | VTGLHSGTLQVFVRK                  | T(2): 50.0; S(6): 50.0; T(8): 0.1                                                             | -0,71 | 0,45  | -0,43 | 0,41  |

|         |          |                                 |                                                                                                                        |       |       |       |       |
|---------|----------|---------------------------------|------------------------------------------------------------------------------------------------------------------------|-------|-------|-------|-------|
| Nsmf    | A2AJ96   | MYSVDGVSDVPIR                   | Y(2): 0.0; S(3): 100.0; S(8): 0.0                                                                                      | 0.48  | 0.23  | -0.72 | 0.29  |
| Nudt3   | Q9JI46   | SESEEEVLLVSSSR                  | S(1): 0.0; S(3): 100.0; S(11): 0.0; S(12): 0.0; S(13): 0.0                                                             | 0.65  | 0.34  | -0.70 | 0.61  |
| Pacsin1 | Q61644   | GRLDSGQLGLYPANYVEAI             | S(5): 100.0; Y(11): 0.0; Y(15): 0.0                                                                                    | 0.35  | 0.07  | 0.57  | -0.05 |
| Pacsin1 | Q61644   | KAEGATLSNATGAVESTSQAGDR         | T(6): 0.0; S(8): 0.0; T(11): 0.0; S(16): 6.2; T(17): 46.9; S(18): 46.9                                                 | 0.08  | -0.21 | 0.29  | -0.11 |
| Pacsin1 | Q61644   | KAEGATLSNATGAVESTSQAGDRGVSYSYDR | T(6): 0.0; S(8): 0.0; T(11): 0.1; S(16): 78.2; T(17): 16.7; S(18): 3.8; S(25): 0.9; S(27): 0.2; S(28): 0.1; Y(29): 0.1 | -0.87 | 0.22  | -0.06 | 0.63  |
| Pacsin1 | Q61644   | KAEGATLSNATGAVESTSQAGDRGVSYSYDR | T(6): 0.0; S(8): 0.0; T(11): 0.0; S(16): 2.9; T(17): 2.9; S(18): 2.9; S(25): 87.7; S(27): 2.9; S(28): 0.6; Y(29): 0.1  | -0.77 | 1.17  | -0.53 | 0.28  |
| Pacsin1 | Q61644   | STSGPGMPMNWPQFEENWDLPHHTAK      | S(1): 0.0; T(2): 0.0; S(3): 1.1; T(24): 97.9; T(25): 1.1                                                               | 0.36  | -0.18 | -0.61 | 0.41  |
| Pak3    | Q61036-2 | IGQGASGTVYALDIATGQVEAIK         | S(6): 0.0; T(8): 0.0; Y(10): 0.0; T(11): 0.0; T(17): 100.0                                                             | -0.90 | 0.29  | 1.31  | -0.19 |
| Palmd   | Q9JHU2   | RSNGPHTSPTRTPQPR                | S(2): 0.0; T(6): 0.0; T(8): 50.0; S(9): 50.0; T(11): 0.0; T(14): 0.0                                                   | -0.85 | -0.07 | -0.55 | 0.70  |
| Palmd   | Q9JHU2   | SGPQCSSPTCQEETEDVR              | S(1): 0.0; S(6): 50.0; S(7): 50.0; T(9): 0.0; T(14): 0.0                                                               | -0.66 | 0.49  | -0.64 | 0.37  |
| Palmd   | Q9JHU2   | SNGPHTSPTRTPQPR                 | S(1): 0.0; T(5): 0.3; T(7): 49.7; S(8): 49.7; T(10): 0.3; T(13): 0.0                                                   | 1.15  | -1.30 | 0.15  | 0.00  |
| Pcdh11x | B1AZR7   | GDSPHIEHPL                      | S(3): 100.0                                                                                                            | -0.79 | 0.14  | 1.31  | -0.93 |
| Pclo    | Q9QYX7   | ENPELVDDLSPR                    | S(10): 100.0                                                                                                           | -0.73 | 0.37  | -0.17 | -0.07 |
| Pclo    | Q9QYX7   | GSVPAAAAESPMHR                  | S(2): 0.0; S(10): 94.2; S(12): 5.8                                                                                     | -0.35 | 0.28  | 0.79  | -0.74 |
| Pclo    | Q9QYX7   | KDFSQESSPSSPSDLAK               | S(3): 0.0; S(5): 0.0; S(8): 0.0; S(9): 0.0; S(11): 94.1; S(12): 5.9; S(14): 0.0                                        | -0.17 | 0.22  | -0.19 | 1.16  |
| Pclo    | Q9QYX7   | RSQEVTDLFLAQLTSSR               | S(2): 100.0; S(15): 0.0; S(16): 0.0                                                                                    | -0.12 | 0.53  | -1.02 | 0.58  |
| Pclo    | Q9QYX7   | TIELNSTVTDK                     | S(6): 100.0                                                                                                            | 0.40  | 0.37  | 0.27  | 0.06  |
| Pclo    | Q9QYX7   | TSIGSSSSSEYKQEDSQSGEDEFIR       | T(1): 0.0; S(2): 0.0; S(5): 0.0; S(6): 0.0; S(7): 0.0; S(8): 0.0; Y(11): 0.0; S(16): 0.7; S(19): 99.3                  | -0.80 | 0.44  | -0.14 | 0.18  |
| Pp2d1   | Q8BVT6   | ECIISNLLR                       | S(5): 100.0                                                                                                            | -1.02 | 0.91  | 1.62  | -0.97 |
| Ppp1r18 | Q8BQ30   | EEAEAQRPLR                      |                                                                                                                        | 0.56  | -0.38 | -0.90 | 0.41  |
| Ppp6r3  | Q922D4-2 | IQQFDDGGSDDEEIIWEEK             | S(9): 100.0                                                                                                            | -0.87 | 0.90  | 0.71  | -0.13 |
| Prkcb   | P68404-2 | NIDQSEFEFGFSVNSEFLKPEVK         | S(5): 0.5; S(11): 49.8; S(15): 49.8                                                                                    | -1.31 | 0.23  | 1.24  | -1.29 |
| Prkcb   | P68404   | QPVELTPTDK                      | T(6): 100.0; T(8): 0.0                                                                                                 | 0.68  | -1.25 | -0.02 | 0.13  |
| Prrc2c  | Q3TLH4-5 | AFGSGIDIKPGTPPIGGR              |                                                                                                                        | -0.18 | 0.20  | -0.50 | 0.49  |
| Prrc2c  | Q3TLH4-5 | ATSTSPNSQSSK                    | T(2): 0.0; S(3): 0.0; T(4): 4.6; S(5): 95.4; S(8): 0.0; S(10): 0.0; S(11): 0.0                                         | 0.76  | -1.08 | -0.40 | 0.18  |
| Prrt2   | E9PUL5   | ASPSPPSEAR                      | S(2): 99.3; S(4): 0.1; S(6): 0.7; S(8): 0.0                                                                            | -0.81 | 0.50  | -0.71 | 0.37  |
| Prrt2   | E9PUL5   | QENGAVVPLQAGDGEPPAPQPHSPSTK     | S(24): 100.0; S(27): 0.0; T(28): 0.0                                                                                   | 0.18  | 0.18  | -0.44 | 0.20  |
| Rab3a   | P63011   | MSESLDTADPAVTGAK                | S(2): 100.0; S(4): 0.0; T(7): 0.0; T(13): 0.0                                                                          | 0.34  | 0.06  | -0.49 | -0.26 |
| Rbbp8   | Q80YR6   | MDVTVIDTK                       | T(4): 100.0; T(8): 0.0                                                                                                 | -0.75 | 0.47  | 0.46  | -0.72 |
| Reps2   | A2AFI8   | APSQAESSPTK                     | S(3): 0.0; S(8): 0.3; S(9): 99.7                                                                                       | -0.81 | 0.05  | -1.14 | 0.51  |
| Reps2   | A2AFI8   | SFSVEREPQENNSNPDEPWR            | S(1): 10.6; S(3): 89.4; S(13): 0.0; Y(15): 0.0                                                                         | -0.23 | 0.68  | -0.10 | -0.09 |
| Rgs14   | P97492   | EPGSSHLGSPDTAR                  | S(4): 0.0; S(5): 0.7; S(9): 99.2; T(12): 0.0                                                                           | 0.42  | -0.11 | 0.28  | -0.30 |
| Rgs14   | P97492   | SLGSGESESESRPGK                 |                                                                                                                        | -0.01 | 0.19  | -0.47 | 0.33  |
| Rltpr   | Q3V3V9-2 | LEAPPSPSLGSLGSKPLPPYPTSPSPER    | S(6): 0.0; S(8): 0.0; S(11): 0.0; S(15): 0.0; S(26): 50.0; S(27): 50.0                                                 | 0.94  | -0.11 | -1.26 | 0.34  |
| Rnf20   | Q5DTM8   | ALVPEPEPDSDSNQR                 | S(11): 6.2; S(13): 93.8                                                                                                | -0.91 | 0.04  | 0.56  | -0.52 |
| Scg2    | Q03517   | EHLGPGSSQEMER                   | S(7): 2.8; S(8): 97.2                                                                                                  | 0.62  | 0.26  | 0.33  | 0.06  |
| Scg2    | Q03517   | RVPSPVSSDDLQEEEQLEQAIK          | S(4): 0.0; S(7): 99.5; S(8): 0.5                                                                                       | -1.28 | 0.62  | 0.05  | 0.09  |
| Scg2    | Q03517   | VPSPVSSDDLQEEEQLEQAIK           | S(3): 0.0; S(6): 50.0; S(7): 50.0                                                                                      | -0.40 | 0.58  | 1.10  | -0.48 |
| Sdc4    | Q35988   | VSMSSTAQGSNIFER                 | S(2): 0.7; S(4): 0.7; S(5): 5.4; T(6): 46.6; S(10): 46.6                                                               | 0.54  | -0.21 | 0.64  | -0.17 |
| Sept2   | P42128   | EGSPIHPDLGSK                    | S(3): 100.0; S(13): 0.0                                                                                                | 0.60  | -0.36 | 1.09  | -0.59 |
| Sept2   | P42208   | IYHLPDAESDEDEDFKEQTR            | S(9): 100.0                                                                                                            | 0.54  | -0.42 | -0.34 | 0.40  |
| Sipa1l3 | G3X9J0   | SSSEITLSECDVEEPGDPR             | S(1): 8.5; S(2): 8.5; S(3): 83.1; T(6): 0.0; S(8): 0.0                                                                 | 0.97  | -0.62 | -1.57 | 0.30  |
| Sirt2   | Q8VDQ8   | EHANIDAQSGSQAPNPSTTISPGKSPPPAK  | S(9): 0.0; S(11): 0.0; S(17): 42.8; T(18): 42.8; T(19): 6.6; S(21): 1.1; S(25): 6.6                                    | 0.49  | -0.17 | -0.81 | 0.24  |
| Sirt2   | Q8VDQ8   | REHANIDAQSGSQAPNPSTTISPGKSPPPAK | S(10): 0.0; S(12): 0.0; S(18): 0.7; T(19): 0.7; T(20): 32.9; S(22): 32.9; S(26): 32.9                                  | 1.33  | -0.84 | -0.62 | 0.21  |

|                                         |          |                             |                                                                                                |       |       |       |       |
|-----------------------------------------|----------|-----------------------------|------------------------------------------------------------------------------------------------|-------|-------|-------|-------|
| Slc12a5                                 | Q91V14   | ETDPEVHLTWTK                | T(2): 0.0; T(9): 99.6; T(11): 0.4                                                              | -1.67 | 1.01  | 0.52  | -0.59 |
| Slc1a3                                  | P56564   | DVEMGNSVIEENEMK             | S(7): 100.0                                                                                    | -0.52 | 0.55  | 1.07  | -0.75 |
| Slc1a3                                  | P56564   | DVEMGNSVIEENEMK             | S(7): 100.0                                                                                    | -0.76 | 0.34  | 0.21  | -0.28 |
| Slc1a4                                  | Q35874   | SEEETSPLVTHQNPAGPVAIAPELESK | S(1): 0.0; T(5): 98.9; S(6): 1.1; T(10): 0.0; S(26): 0.0                                       | 0.50  | -0.41 | 0.47  | -0.81 |
| Slc7a14                                 | Q8BXR1   | ETCSPVSEGEFSSPATNTCGAK      | T(2): 33.3; S(4): 33.3; S(7): 33.3; S(13): 0.0; S(14): 0.0; T(17): 0.0; T(19): 0.0             | -0.94 | 0.98  | 0.48  | -0.88 |
| Slc7a14                                 | Q8BXR1   | HKQNSEALIANDELDCSPE         | S(5): 0.0; S(17): 100.0                                                                        | 0.72  | -0.14 | -0.03 | 0.19  |
| Slc7a14                                 | Q8BXR1   | HKQNSEALIANDELDCSPE         | S(5): 0.0; S(17): 100.0                                                                        | -0.06 | 0.09  | -0.83 | 0.24  |
| Slc9a6                                  | A1L3P4   | LVLPMDDSEPALNSLDDTRHSPA     | S(8): 0.0; S(14): 0.0; T(18): 6.0; S(21): 94.0                                                 | -0.09 | -0.19 | -0.55 | -0.02 |
| Slc9a6                                  | A1L3P4   | LVLPMDDSEPALNSLDDTRHSPA     | S(8): 0.0; S(14): 0.0; T(18): 0.7; S(21): 99.3                                                 | 0.35  | 0.37  | -0.59 | 0.25  |
| Sparcl1                                 | P70663   | AAGSKEHIPHTEQQDQEGK         | S(4): 100.0; T(11): 0.0                                                                        | -0.68 | -0.05 | 0.11  | 0.11  |
| Sparcl1                                 | P70663   | AEKPSALNSEETHEQSTEQDK       | S(5): 33.1; S(9): 33.1; T(13): 33.1; S(17): 0.3; T(18): 0.3                                    | -0.95 | 0.56  | 0.54  | 0.10  |
| Sparcl1                                 | P70663   | GKESQEQPVSDSHQQPNESK        | S(4): 24.9; S(10): 24.9; S(12): 24.9; S(19): 24.9; S(20): 0.2                                  | -0.68 | 0.06  | -0.16 | 0.35  |
| Sparcl1                                 | P70663   | KAESSPNAEPSDEGNSR           | S(4): 0.0; S(5): 0.0; S(11): 100.0; S(16): 0.0                                                 | -0.29 | -0.58 | 0.04  | 0.08  |
| Specc1                                  | Q5SXY1   | ASSEDTLNKPGSASSGVAR         | S(2): 50.0; S(3): 50.0; T(6): 0.0; S(12): 0.0; S(14): 0.0; S(15): 0.0                          | -0.12 | 0.07  | -0.54 | 0.38  |
| Specc1                                  | Q5SXY1   | GSPTGSSPNASELSLASLSTEK      | S(2): 23.7; T(4): 23.7; S(6): 23.7; S(7): 23.7; S(12): 4.4; S(15): 0.9; S(18): 0.0; T(20): 0.0 | 2.59  | -1.89 | -0.17 | 0.51  |
| Specc1                                  | Q5SXY1   | GSPTGSSPNASELSLASLSTEK      | S(2): 31.6; T(4): 31.6; S(6): 31.6; S(7): 5.0; S(12): 0.2; S(15): 0.0; S(18): 0.0; T(20): 0.0  | -0.15 | 0.11  | -0.46 | -0.05 |
| Sptbn1                                  | Q62261   | ESSPVPSPDLDR                | S(2): 93.7; S(3): 6.3; S(7): 0.0; T(9): 0.0                                                    | 0.38  | -0.22 | 2.11  | -1.83 |
| Sptbn1                                  | Q62261   | RPPSPDPNTK                  | S(4): 100.0; T(9): 0.0                                                                         | 0.04  | -0.15 | 0.29  | 0.50  |
| Srrm2                                   | Q8BTI8-3 | ELSHSPPRENSFESSLEFK         | S(3): 12.7; S(5): 86.9; S(11): 0.1; S(14): 0.1; S(15): 0.3                                     | -0.38 | 0.43  | 0.60  | -0.35 |
| Srrm2                                   | Q8BTI8-3 | SGAGSPPGK                   | S(1): 0.0; S(5): 100.0                                                                         | -0.67 | 0.12  | 0.19  | 0.02  |
| Srrm2                                   | Q8BTI8-3 | SLLPNSSQDELMEVEK            | S(1): 0.2; S(6): 49.9; S(7): 49.9                                                              | -0.24 | 0.09  | -0.48 | 0.30  |
| Stim1                                   | P70302   | LIEGVHPGSLVEK               |                                                                                                | 0.39  | -0.16 | 0.53  | -0.21 |
| Syk                                     | E9PWE9   | ELNGTYAISGGR                | T(5): 50.0; Y(6): 50.0; S(9): 0.0                                                              | 0.84  | -0.52 | -0.64 | 0.17  |
| Syn1                                    | O88935   | QASISGPAPTK                 | S(3): 100.0; S(5): 0.0; T(10): 0.0                                                             | -1.05 | 0.85  | 0.21  | -0.02 |
| Syn1                                    | O88935   | QSRPVAGGPGAPPAARPPASPPQR    | S(2): 0.0; S(20): 0.3; S(22): 99.7                                                             | 0.25  | 0.42  | 0.70  | 0.30  |
| Syn1                                    | O88935   | SQSLTNAFNLPAPPRPSLSQDEVK    | S(1): 0.0; S(3): 0.0; T(5): 0.0; S(19): 50.0; S(21): 50.0                                      | -0.46 | 0.61  | -0.18 | 0.47  |
| Synpr                                   | D3Z5Q8   | QASDWHSLSLQLSLGLYK          | S(3): 10.1; S(7): 89.9; S(9): 0.0; S(14): 0.0                                                  | 2.79  | -2.95 | -0.98 | 0.05  |
| Tcp1111                                 | Q8BTG3   | QEAENGALDISK                | S(11): 100.0                                                                                   | 2.48  | -1.94 | 0.57  | -0.16 |
| Tmem161a                                | MOQWV0   | YIHPSEELR                   | Y(1): 50.0; S(5): 50.0                                                                         | -0.74 | 0.46  | 0.54  | -0.83 |
| Tmem161a                                | MOQWV0   | YIHPSEELR                   | Y(1): 50.0; S(5): 50.0                                                                         | -0.75 | 0.41  | 0.21  | -0.12 |
| Tom1                                    | O88746   | GLEFPMTDLMLSPIHTPQR         | T(7): 0.0; S(13): 100.0; T(17): 0.0                                                            | -0.92 | 0.34  | 0.53  | -1.27 |
| Tppp                                    | Q7TQD2   | AANKTPPKSPGDPAR             | T(5): 100.0; S(9): 0.0                                                                         | -0.24 | 0.19  | -0.63 | 0.67  |
| Tppp                                    | Q7TQD2   | RLSLESEGANEGATAAPELSALEEAFR | S(3): 99.6; S(6): 0.4; T(14): 0.0; S(20): 0.0                                                  | -0.69 | 0.16  | -0.16 | -0.47 |
| Tsc22d2                                 | E9Q7M2   | TEDVSSEIFDVSR               | T(1): 0.0; S(5): 50.0; S(6): 50.0; S(12): 0.0                                                  | -1.91 | 1.05  | 1.42  | 0.06  |
| Tsg101                                  | Q61187   | QILNLYAEENAIEDTIFYLGEALR    | Y(6): 50.0; T(15): 50.0; Y(18): 0.0                                                            | 0.50  | -0.39 | -0.58 | 0.48  |
| Ube2w                                   | D6RCG4   | ELLALQNDPPPGMTLNEK          | T(14): 100.0                                                                                   | 0.71  | -0.52 | 0.51  | -0.60 |
| Unc13a                                  | Q4KUS2   | ESYSDSMHSYEEFSEPR           | S(2): 0.0; Y(3): 0.0; S(4): 0.0; S(6): 0.0; S(9): 93.7; Y(10): 6.3; S(14): 0.0                 | -0.70 | 0.21  | 0.59  | -0.33 |
| Uncharacterized protein C4orf21 homolog | Q0VGT4   | SSSELSEVINMSSLK             | S(1): 0.5; S(2): 2.3; S(3): 12.9; S(6): 0.5; S(13): 83.9                                       | 0.38  | -0.06 | -0.43 | 0.53  |
| Utp20                                   | Q5XG71   | EVMEANLPSILLK               | S(9): 100.0                                                                                    | 0.56  | -0.75 | -0.47 | 0.09  |
| Wfs1                                    | Q3UN10   | LNATASLEQDK                 | T(4): 6.4; S(6): 93.6                                                                          | -0.90 | 0.18  | 1.08  | -0.38 |
| Wfs1                                    | Q3UN10   | LNATASLEQDK                 | T(4): 0.0; S(6): 100.0                                                                         | -0.09 | -0.28 | 0.22  | -0.55 |
| Wwp1                                    | Q8BZZ3   | SSSPPIEQQNGDALHENGDPATR     | S(1): 0.4; S(2): 49.8; S(3): 49.8; T(23): 0.0                                                  | 0.43  | -0.38 | 0.49  | 0.17  |
| Zswim8                                  | Q3UHH1-5 | RTFANGSADEFQR               | T(2): 91.1; S(7): 8.9                                                                          | -0.90 | 0.23  | 0.58  | -0.08 |

**Supplementary Table S8: Common proteins up and down phosphorylated in cortex of Tg(*Dyrk1a*) and Ts65Dn mice, and reverted by L41 treatment.**

| Gene name | Protein Group Accessions | Sequence                        | phosphoRS Site Probabilities                                                                                         | Ts65Dn vs WT | Ts65Dn +/-L41 | TgDyrk1A vs WT | TgDyrk1A +/-L41 |
|-----------|--------------------------|---------------------------------|----------------------------------------------------------------------------------------------------------------------|--------------|---------------|----------------|-----------------|
| Adcy5     | P84309                   | APPAGGSGSSAAAAAAGTEVRPR         | S(7): 0.7; S(9): 49.7; S(10): 49.7; T(20): 0.0                                                                       | 0.17         | 0.03          | 0.51           | -0.33           |
| Adcy5     | P84309                   | SVSPGYAAQTAASPAPR               | S(1): 0.0; S(3): 100.0; Y(7): 0.0; T(11): 0.0; S(14): 0.0                                                            | -0.75        | 0.01          | 0.29           | -0.05           |
| Add2      | Q9QYB8                   | DIATEKPGSPVK                    | T(4): 0.0; S(9): 100.0                                                                                               | -0.28        | -0.09         | 0.20           | 0.31            |
| Add2      | Q9QY81                   | ELASPLALTPR                     | S(4): 0.8; T(9): 99.2                                                                                                | 0.64         | 0.36          | -0.63          | 0.29            |
| Agap2     | Q3UHD9                   | AISAFGPSASINGLVK                | S(3): 0.0; S(8): 50.0; S(10): 50.0                                                                                   | 1.38         | -0.04         | 0.70           | -0.23           |
| Aldoc     | P05063                   | RLSQIGVENTEENR                  | S(3): 100.0; T(10): 0.0                                                                                              | -0.13        | 0.15          | 0.15           | -0.61           |
| Aldoc     | P05063                   | GILAADESIVGSMK                  | S(8): 100.0; S(11): 0.0                                                                                              | -0.18        | -0.22         | 0.07           | 0.31            |
| Aldoc     | P05063                   | GILAADESIVGSMK                  | S(8): 100.0; S(11): 0.0                                                                                              | 0.64         | -0.48         | -0.49          | 0.08            |
| Ap2a1     | P17426-2                 | RDTSSNDINGGVEPTSTVSTPSPSADLLGLR | T(3): 0.0; S(4): 0.0; S(5): 0.0; T(15): 0.0; S(17): 0.0; T(18): 0.0; S(20): 0.6; T(21): 0.6; S(23): 98.3; S(25): 0.6 | 0.56         | 0.15          | 1.37           | -0.78           |
| Apc       | B2RUG9                   | QSVGSGSPVQTVGLETR               | S(2): 0.0; S(5): 0.4; S(7): 99.5; T(11): 0.0; T(16): 0.0                                                             | 0.48         | -0.62         | 0.66           | -0.39           |
| Apc       | B2RUG9                   | TPASKSPSEGGATTSPR               | T(1): 0.0; S(4): 49.9; S(6): 49.9; S(8): 0.2; T(14): 0.0; T(15): 0.0; S(16): 0.0                                     | -0.80        | -0.03         | 0.30           | -0.18           |
| Apc       | B2RUG9                   | SPTGNTPPVIDSVSEK                | S(1): 99.9; T(3): 0.1; T(6): 0.0; S(12): 0.0; S(14): 0.0                                                             | 0.64         | -0.29         | -0.17          | 0.37            |
| Arhgap21  | B7ZCJ1                   | DQGEVSPSEDEPFSWPGPK             | S(7): 91.8; S(9): 8.2; S(15): 0.0                                                                                    | 1.16         | -1.15         | 0.53           | -0.67           |
| Arhgef7   | Q9ES00                   | LAGGQTSQPTTPLTSPQR              | T(6): 0.0; S(7): 0.0; T(10): 0.0; T(11): 0.0; T(14): 9.5; S(15): 90.5                                                | 0.61         | 0.22          | -0.78          | 0.00            |
| Asap1     | H3BL41                   | QASESDNLTPTLPETPVPLPR           | S(3): 87.1; S(6): 12.9; T(10): 0.0; T(12): 0.0; T(16): 0.0                                                           | 0.22         | -0.37         | 3.10           | -1.42           |
| Asap1     | H3BL41                   | TLSDPPSPLPHGPPNK                | T(1): 0.0; S(3): 100.0; S(7): 0.0                                                                                    | 0.41         | -0.73         | -0.08          | 0.21            |
| Asap1     | H3BL41                   | GVFPVSVFVHILSD                  | S(6): 0.0; S(12): 100.0                                                                                              | 1.58         | -1.07         | -0.30          | 0.28            |
| Atp13a1   | Q9EPB4                   | EIHPYLVMDELS                    | Y(5): 0.0; S(13): 100.0                                                                                              | -0.84        | 0.19          | 1.31           | -0.30           |
| Atp1a3    | Q6PIC6                   | VDNSSLTGESEPTQTRSPDCTHDNPLETR   | S(4): 16.7; S(5): 16.7; T(7): 16.7; S(10): 16.7; T(14): 16.7; S(16): 16.7; T(20): 0.0; T(27): 0.0                    | -0.88        | 0.70          | 1.07           | -0.01           |
| Avl9      | Q80U56                   | DSLPSDSPPIVQPOANNR              | S(2): 0.0; S(5): 0.7; S(7): 99.3; T(11): 0.0                                                                         | 0.97         | -0.44         | 2.25           | -1.20           |
| Avl9      | Q80U49                   | GASPVTPSTTPPPPTDPQLTK           | S(3): 0.0; T(6): 1.1; S(8): 6.7; T(9): 45.5; T(10): 45.5; T(15): 1.1; T(20): 0.0                                     | 0.72         | 3.19          | -2.00          | -2.09           |
| Begain    | F8WIG2                   | GDIYCDPALYCPDER                 | Y(4): 0.0; S(6): 100.0; Y(11): 0.0                                                                                   | -0.81        | 0.71          | 0.52           | 0.26            |
| Begain    | F8WIG2                   | RPSVDTPTVDVGFLLR                | S(3): 6.4; T(6): 93.6; T(9): 0.0                                                                                     | 0.88         | -0.15         | 0.41           | 0.34            |
| Begain    | F8WIG2                   | ADSFSEGDLSQGHAEPCFLR            | S(3): 100.0; S(5): 0.0; S(11): 0.0                                                                                   | -0.63        | 0.05          | 0.09           | 0.28            |
| Bod1l     | E9Q6J5                   | GSDDVLVSGEVPECEVGHMSPR          | S(2): 0.0; S(8): 0.0; S(20): 100.0                                                                                   | 1.15         | -0.65         | 0.86           | -0.91           |
| Bora      | Q8BRF7                   | VNLEESTGVENSAPGARPK             | S(6): 0.0; T(7): 0.0; S(12): 100.0                                                                                   | 0.53         | -0.27         | -0.53          | 1.06            |
| Braf      | F6SZ47                   | SSSAPNVHINTIEPVNIDDLIR          | S(1): 47.2; S(2): 47.2; S(3): 5.6; T(11): 0.0                                                                        | -1.19        | 1.04          | -0.65          | -0.10           |
| Brsk1     | Q5RJ15                   | MQVPTAEEMSSLTPSSPELAK           | T(5): 0.0; S(10): 0.0; S(11): 0.0; T(13): 0.0; S(16): 50.0; S(17): 50.0                                              | -0.28        | 0.10          | 0.51           | -0.09           |
| Brsk1     | Q5RJ15                   | SPVFSFSPEPGAGDEAR               | S(1): 99.9; S(5): 0.1; S(7): 0.0                                                                                     | -0.23        | 0.44          | -0.64          | -0.08           |
| Brsk1     | Q5PR73                   | CDESPNREVQSSEAEALAR             | S(4): 100.0; S(11): 0.0; S(12): 0.0                                                                                  | -0.70        | 0.76          | 0.40           | -0.26           |
| Cacna1b   | A2AIR9                   | EVAEVSMPMSAANISIAAR             | S(6): 99.9; S(9): 0.1; S(14): 0.0                                                                                    | -0.83        | 0.45          | 0.71           | -0.18           |
| Camk2d    | E9Q1T1                   | ENFSGGTSLWQNI                   | S(4): 88.3; T(7): 5.8; S(8): 5.8                                                                                     | 0.84         | -0.14         | 0.57           | 0.12            |
| Camsap2   | Q8C1B1                   | RFSPSQVPIQTR                    | S(3): 100.0; S(5): 0.0; T(11): 0.0                                                                                   | 0.37         | -0.11         | 0.50           | -0.32           |
| Camsap2   | Q8C0T7                   | SEGLTQGAATTSTARR                | S(1): 0.0; T(4): 0.1; T(10): 98.7; T(11): 1.1; S(12): 0.0; T(13): 0.0                                                | -0.64        | 0.50          | -0.58          | 0.15            |
| Cep170b   | Q80U49                   | GASPVTPSTTPPPPTDPQLTK           | S(3): 0.0; T(6): 0.0; S(8): 0.0; T(9): 0.0; T(10): 0.4; T(15): 99.6; T(20): 0.0                                      | -1.15        | 0.17          | 0.54           | 0.18            |
| Cep170b   | Q80U49                   | SQGPRDDEEEDPDYGFIVQTAIEIAR      | S(1): 0.2; T(7): 99.6; Y(17): 0.2; T(23): 0.0                                                                        | -0.70        | 0.51          | 0.23           | -0.11           |
| Cep170b   | Q80U49                   | SQGPRDDEEEDPDYGFIVQTAIEIAR      | S(1): 49.4; T(7): 49.4; Y(17): 1.3; T(23): 0.0                                                                       | 0.50         | 0.71          | 0.08           | 0.47            |



|               |          |                                     |                                                                                                                                              |       |       |       |       |
|---------------|----------|-------------------------------------|----------------------------------------------------------------------------------------------------------------------------------------------|-------|-------|-------|-------|
| Cep170b       | Q80T23   | GASSPDMEPSYGGGLFDMVK                | S(3): 6.9; S(4): 93.1; S(10): 0.0; Y(11): 0.0                                                                                                | -0,01 | 0,61  | -0,58 | 0,39  |
| Chga          | P26339   | GELEHSQQEEDGEEAMVGTQGLFPQGGK        | S(6): 100.0; T(19): 0.0                                                                                                                      | -0,63 | 0,55  | 0,73  | -0,52 |
| Chga          | P26339   | GELEHSQQEEDGEEAMVGTQGLFPQGGK        | S(6): 100.0; T(19): 0.0                                                                                                                      | 0,62  | -0,36 | 0,61  | 0,40  |
| Col3a1        | P08121   | GENGSPGAPGAPGHPGPPGVPVPSGK          | S(5): 100.0; S(24): 0.0                                                                                                                      | -0,85 | -0,17 | 0,60  | -0,19 |
| Col3a1        | P08121   | GFPGNPGGSPGAAGHQGAIGSPGPAGPR        | S(11): 50.0; S(23): 50.0                                                                                                                     | -1,00 | -0,07 | 0,35  | 0,41  |
| Comt          | O88587-2 | AVYQGGSSPVKS                        | Y(3): 0.0; S(8): 0.5; S(9): 99.5; S(13): 0.0                                                                                                 | 0,17  | -0,06 | -0,25 | -0,01 |
| Comt          | O88587-2 | AVYQGGSSPVK                         | Y(3): 0.0; S(8): 50.0; S(9): 50.0                                                                                                            | 0,68  | 0,24  | -0,70 | 0,39  |
| Ctnnd2        | E9QKH8   | TGSQHGPNAAAATFQR                    | T(1): 8.4; S(3): 91.6; T(14): 0.0                                                                                                            | -0,58 | 0,01  | 0,55  | -0,97 |
| Ctnnd2        | E9QKH8   | TGSQHGPNAAAATFQR                    | T(1): 0.0; S(3): 100.0; T(14): 0.0                                                                                                           | -0,38 | 0,05  | 0,12  | -0,79 |
| Ctps1         | P70698   | SGSSSPDSEITELK                      | S(1): 0.0; S(3): 0.0; S(4): 0.0; S(5): 0.2; S(8): 99.8; T(11): 0.0                                                                           | 0,85  | -0,11 | 0,82  | -1,17 |
| D430041D05Rik | D3YZ21   | QSLNSPSPGETEMDLLVTR                 | S(2): 0.0; S(5): 100.0; S(7): 0.0; T(11): 0.0; T(18): 0.0                                                                                    | -0,62 | 0,14  | 0,58  | -0,10 |
| Dchs1         | F6TP58   | ITFNLLAGGDGLFTVDPTTGHVR             | T(2): 0.1; T(14): 43.8; T(18): 12.3; T(19): 43.8                                                                                             | 0,51  | -0,19 | -1,01 | -0,28 |
| Dhx16         | Q04690-2 | SSSGLATYSPPMGAVSER                  | S(1): 0.0; S(2): 0.0; S(3): 0.0; T(7): 0.0; Y(8): 6.8; S(9): 93.2; S(16): 0.0                                                                | 2,15  | -1,77 | 1,04  | -1,81 |
| Dlg4          | Q62073   | SIQDLTVTGTEPGQVSSR                  | S(1): 100.0; T(6): 0.0; T(8): 0.0; T(10): 0.0; S(16): 0.0; S(17): 0.0                                                                        | -0,78 | 0,33  | -0,45 | -0,15 |
| Echdc1        | Q9D8U8   | SVSVDLNVDPSLQIDIPDALSER             | S(1): 12.1; S(3): 87.9; S(11): 0.0; S(21): 0.0                                                                                               | -0,70 | -0,37 | -0,38 | 1,04  |
| Ehd3          | Q9QXY6   | DKPMYDEIFYTLSPVDGK                  | Y(5): 0.0; Y(10): 0.1; T(11): 8.1; S(13): 91.9                                                                                               | 1,38  | -1,10 | -0,62 | -0,42 |
| Ehd3          | Q9QXW9   | NHPGSDTSPEAEASSGGGVALK              | S(5): 6.3; T(7): 6.3; S(8): 87.5; S(14): 0.0; S(15): 0.0                                                                                     | -1,39 | 1,64  | -2,43 | 0,58  |
| Eml2          | E9QK48   | VGGYATSPSSPK                        | Y(4): 0.0; T(6): 0.3; S(7): 33.2; S(9): 33.2; S(10): 33.2                                                                                    | 0,81  | -0,76 | -0,44 | 2,07  |
| Epn1          | Q80V94   | IIEQPECSSPVIETER                    | S(8): 50.0; S(9): 50.0; T(14): 0.0                                                                                                           | 0,81  | -0,44 | 0,48  | -0,42 |
| Fam195b       | Q3UED7   | LYFLDMVTEDAKTLK                     | Y(2): 100.0; T(8): 0.0; T(13): 0.0                                                                                                           | -0,69 | 0,23  | -0,76 | 0,57  |
| Gm15800       | E9Q2E4   | SMSAPSDLEMIGNEDLEFTR                | S(1): 47.3; S(3): 47.3; S(6): 5.4; T(19): 0.0                                                                                                | 0,67  | -0,87 | 0,54  | -1,11 |
| Gm15800       | E9Q2E4   | SMSAPSDLEMIGNEDLEFTR                | S(1): 49.9; S(3): 49.9; S(6): 0.1; T(19): 0.0                                                                                                | -0,19 | 0,27  | -0,59 | 0,39  |
| Gm15800       | E9Q2E4   | TEGTPPPGQPAK                        | T(1): 0.0; T(4): 100.0                                                                                                                       | 0,51  | -0,58 | -0,62 | 0,10  |
| Gm996         | A2AJA9   | ASQGLATAPASPPVLR                    | S(2): 0.0; T(7): 0.0; S(11): 100.0                                                                                                           | 0,18  | -0,26 | 1,38  | -0,52 |
| Gm996         | A2AJA9   | QRSLEQLDELITDLVIDSR                 | S(3): 100.0; T(12): 0.0; S(18): 0.0                                                                                                          | -0,66 | 0,43  | 0,26  | -0,70 |
| Gpkow         | Q53YU8   | VEDLNTFGPK                          | T(6): 100.0                                                                                                                                  | -0,53 | -0,21 | 1,66  | -1,43 |
| Gpr162        | Q3UMB5   | VASPANVGTLHTLSR                     | S(3): 100.0; T(9): 0.0; T(12): 0.0; S(14): 0.0                                                                                               | 0,45  | -0,36 | -0,54 | -0,06 |
| Gprin1        | Q3UNH4   | AETVSPGEVDAMTLGK                    | T(3): 0.3; S(5): 99.7; T(13): 0.0                                                                                                            | 0,24  | -0,04 | 0,49  | 0,00  |
| Gprin1        | Q3UN16   | RLSLGSPDSR                          | S(3): 100.0; S(6): 0.0; S(9): 0.0                                                                                                            | -0,83 | 0,68  | 0,19  | -0,41 |
| Gprin1        | Q3UNH4   | DLAAAAQKSPSAEAAAPPGR                | S(10): 100.0; S(12): 0.0                                                                                                                     | -0,71 | 0,33  | 0,17  | -0,21 |
| Gprin1        | Q3UNH4   | AETVSPGEVDAMTLGK                    | T(3): 7.0; S(5): 93.0; T(13): 0.0                                                                                                            | 0,58  | -0,62 | -0,04 | 0,88  |
| Gprin1        | Q3UNH4   | SVATGPMTPQAAAPPVPPVPEVR             | S(1): 0.0; T(4): 0.1; T(8): 99.9                                                                                                             | 0,12  | -0,46 | -0,23 | 0,36  |
| lqsec2        | E9Q8N8   | MFSNPDNGSPAMTHR                     | S(3): 0.0; S(9): 100.0; T(13): 0.0                                                                                                           | -0,09 | 0,01  | 0,61  | -0,74 |
| lqsec2        | E9QAD8   | AQNPAYFEGKPASLDEGAMAGAR             | Y(6): 0.0; S(13): 100.0                                                                                                                      | -0,56 | 0,04  | -0,04 | 0,51  |
| lqsec2        | E9QAD8   | SSSPGAGGGHSTSTSTSPATTLQR            | S(1): 0.4; S(2): 0.4; S(3): 99.1; S(11): 0.0; T(12): 0.0; S(13): 0.0; T(14): 0.0; S(15): 0.0; T(16): 0.0; S(17): 0.0; T(20): 0.0; T(21): 0.0 | -0,01 | -0,31 | -0,33 | 0,56  |
| Kcnd1         | Q03717   | STSSLPPEPMEIVR                      | S(1): 0.0; T(2): 0.2; S(3): 9.9; S(4): 90.0                                                                                                  | 0,74  | -0,34 | 0,67  | -1,04 |
| Kif1b         | Q60575-2 | SHAVFTIVFTQK                        | S(1): 100.0; T(6): 0.0; T(10): 0.0                                                                                                           | -0,09 | -0,45 | -0,40 | 0,46  |
| Kif1b         | Q60520   | VEDALSYLDQVK                        | S(6): 0.1; Y(7): 99.9                                                                                                                        | -1,57 | 1,20  | -2,20 | 0,33  |
| Klc2          | D3YXZ3   | VDSPTVNTTLR                         | S(3): 100.0; T(5): 0.0; T(8): 0.0; T(9): 0.0                                                                                                 | 0,67  | -0,40 | 0,17  | -0,02 |
| Klc2          | D3YXZ3   | DSLDDLFPNEDEQSPAPSPGGDVAAQHGGYEIPAR | S(2): 0.0; S(14): 100.0; S(18): 0.0; Y(31): 0.0                                                                                              | -0,52 | 0,73  | -0,85 | 0,42  |
| Lmtk3         | Q5XJV6   | ALVNGEPMSPEAGEK                     | S(9): 100.0                                                                                                                                  | 0,11  | -0,23 | 1,08  | 0,12  |
| Lmtk3         | Q5XJV6   | ALVNGEPMSPEAGEK                     | S(9): 100.0                                                                                                                                  | 0,70  | -0,64 | 0,45  | 0,23  |
| Lmtk3         | Q5U4C3   | QPPASVATLASVAAPAAPPASAPR            | S(5): 87.2; T(8): 12.8; S(11): 0.0; S(21): 0.0                                                                                               | 0,09  | -0,43 | -0,06 | 0,43  |
| Lpin2         | Q99P72   | ESAEFSVLEYSEMSSFNQSPK               | S(2): 0.0; S(6): 0.0; Y(10): 0.0; S(11): 0.0; S(15): 0.0; S(16): 6.7; S(20): 93.3                                                            | 0,85  | -1,05 | 0,67  | -0,31 |



|        |          |                                  |                                                                                                                                  |       |       |       |       |
|--------|----------|----------------------------------|----------------------------------------------------------------------------------------------------------------------------------|-------|-------|-------|-------|
| Lppr2  | Q8VCY8-2 | LSPWEDLSQAPTMDSPLEK              | S(2): 0.0; S(8): 0.0; T(12): 0.0; S(15): 100.0                                                                                   | -0,66 | 0,38  | 0,50  | -0,12 |
| Lpin2  | Q99P72   | ESAEFVSLEYSEMGSFNGSPK            | S(2): 0.0; S(6): 0.0; Y(10): 0.0; S(11): 0.0; S(15): 0.0; S(16): 6.7; S(20): 93.3                                                | 0,85  | -1,05 | 0,67  | -0,31 |
| Lppr4  | Q7TME0   | QTYELNDLNR                       | T(2): 50.0; Y(3): 50.0                                                                                                           | 5,46  | -6,56 | 0,63  | -0,33 |
| Lppr4  | Q7TME0   | MSLQVMDETEPEGQSPPR               | S(2): 0.0; T(8): 0.0; S(14): 100.0                                                                                               | -0,69 | 0,19  | 0,49  | -0,45 |
| Mag    | P20917   | GESPELDLSYSHDLGK                 | S(3): 100.0; S(9): 0.0; Y(10): 0.0; S(11): 0.0; S(13): 0.0                                                                       | -0,61 | 0,12  | 0,51  | 0,19  |
| Maoa   | Q640R3   | QNSLEYMDQNDDRK                   | S(3): 99.7; Y(6): 0.3                                                                                                            | -1,70 | 0,81  | 0,70  | -0,26 |
| Map1a  | Q9QYR6-2 | ELSSAVSPPNLHSDTPTFSYASLAGPTIPPR  | S(3): 0.0; S(4): 0.8; S(7): 99.2; S(13): 0.0; T(15): 0.0; T(17): 0.0; S(19): 0.0; Y(20): 0.0; S(22): 0.0; T(27): 0.0             | 0,61  | -0,29 | 0,18  | 0,12  |
| Map1a  | Q9QYR6-2 | SPELSLSSPAMEDLAMEWGGK            | S(1): 0.0; S(4): 0.0; S(6): 5.6; S(7): 94.4                                                                                      | 0,06  | -0,97 | -0,28 | 0,14  |
| Map1a  | Q9QYR6-2 | MASPPSPGPPSAAHTPFHQSPVEEK        | S(3): 98.9; S(7): 1.1; S(11): 0.0; T(15): 0.0; S(20): 0.0                                                                        | -0,88 | 0,77  | -0,30 | -0,31 |
| Map1a  | Q9QYR6-2 | MASPPSPGPPSAAHTPFHQSPVEEK        | S(3): 95.4; S(7): 2.3; S(11): 2.3; T(15): 0.0; S(20): 0.0                                                                        | -0,46 | -0,01 | -0,36 | 0,22  |
| Map1a  | Q9QYR6-2 | EMTLQKKSPEK                      | T(3): 1.2; S(8): 98.8                                                                                                            | -0,09 | 0,23  | -0,39 | 0,17  |
| Map1a  | Q9QYR6-2 | MASPPSPGPPSAAHTPFHQSPVEEK        | S(3): 100.0; S(7): 0.0; S(11): 0.0; T(15): 0.0; S(20): 0.0                                                                       | -0,44 | 0,10  | -0,41 | 0,46  |
| Map1a  | Q9QYR6-2 | APISLSQDPSPLNGSTTSCGPDR          | S(4): 0.0; S(6): 0.0; S(10): 100.0; S(16): 0.0; T(17): 0.0; T(18): 0.0; S(19): 0.0                                               | 0,00  | 0,02  | -0,42 | 0,16  |
| Map1a  | Q9QYR6-2 | EMTLQKKSPEK                      | T(3): 0.1; S(8): 99.9                                                                                                            | -0,10 | 0,29  | -0,42 | 0,14  |
| Map1b  | P14873   | TPEEGYSYEISEK                    | T(1): 100.0; Y(7): 0.0; S(8): 0.0; Y(9): 0.0; S(12): 0.0                                                                         | 1,27  | -1,03 | 0,56  | -0,01 |
| Map1b  | P14873   | SPPLLGSSEPYEDFLSADSK             | S(1): 100.0; S(7): 0.0; S(9): 0.0; Y(11): 0.0; S(16): 0.0; S(19): 0.0                                                            | -0,58 | 0,26  | 0,45  | -0,28 |
| Map1b  | P14873   | TTRSPDTSAYCYETMEK                | T(1): 0.0; T(2): 6.8; S(4): 93.1; T(7): 0.0; S(8): 0.0; Y(10): 0.0; Y(12): 0.0; T(14): 0.0                                       | 0,61  | -0,65 | 0,35  | 0,20  |
| Map1b  | P14873   | DYNASASTISPPSSMEEDK              | Y(2): 0.0; S(5): 0.0; S(7): 0.2; T(8): 1.2; S(10): 87.6; S(13): 9.9; S(14): 1.2                                                  | 0,51  | 0,03  | 0,25  | -0,40 |
| Map1b  | P14873   | TTRSPDTSAYCYETMEK                | T(1): 0.0; T(2): 0.0; S(4): 100.0; T(7): 0.0; S(8): 0.0; Y(10): 0.0; Y(12): 0.0; T(14): 0.0                                      | 0,36  | -0,57 | 0,10  | 0,17  |
| Map1b  | P14873   | QGFPDRESPVSDLTSTGLYQDK           | S(8): 100.0; S(11): 0.0; T(14): 0.0; S(15): 0.0; T(16): 0.0; Y(19): 0.0                                                          | -0,09 | 0,04  | -0,14 | 0,46  |
| Map1b  | P14873   | TLEVVSQSVTGSAGHTPYYSPTDEK        | T(1): 0.0; S(6): 99.3; S(8): 0.7; S(10): 0.0; T(12): 0.0; S(14): 0.0; T(18): 0.0; Y(20): 0.0; Y(21): 0.0; S(23): 0.0; T(25): 0.0 | -0,19 | 0,57  | -0,30 | 0,09  |
| Map1b  | P14873   | TLEVVSQSVTGSAGHTPYYSPTDEK        | T(1): 0.0; S(6): 94.1; S(8): 0.8; S(10): 0.8; T(12): 0.8; S(14): 0.8; T(18): 0.8; Y(20): 0.8; Y(21): 0.8; S(23): 0.0; T(25): 0.0 | -0,02 | -0,23 | -0,39 | 0,08  |
| Map1b  | P14873   | DYNASASTISPPSSMEEDKFSK           | Y(2): 0.0; S(5): 0.0; S(7): 0.6; T(8): 0.6; S(10): 98.8; S(13): 0.0; S(14): 0.0; S(21): 0.0                                      | 0,05  | -0,38 | -0,43 | -0,24 |
| Map1b  | P14873   | LGGDVSPQIDVQFGSFK                | S(6): 50.0; T(8): 50.0; S(13): 0.0; S(17): 0.0                                                                                   | 0,31  | 0,12  | -0,45 | 0,04  |
| Map1b  | P14873   | DYNASASTISPPSSMEEDK              | Y(2): 0.0; S(5): 0.0; S(7): 0.0; T(8): 0.0; S(10): 100.0; S(13): 0.0; S(14): 0.0                                                 | -0,36 | 0,12  | -0,61 | 0,68  |
| Map1b  | P14873   | VLSPLRSPPLLGSSEPYEDFLSADSK       | S(3): 0.8; S(7): 96.9; S(13): 0.8; S(15): 0.8; Y(17): 0.8; S(22): 0.0; S(25): 0.0                                                | 0,44  | 0,29  | -0,81 | 0,34  |
| Map2   | P20357   | ETSPETSLIQDEVALK                 | T(2): 47.5; S(3): 47.5; T(6): 2.5; S(7): 2.5                                                                                     | 0,09  | -0,15 | 0,87  | -1,31 |
| Map2   | P20357   | RLSNVSSSGSINLLESPQLATLAEDVTAALAK | S(3): 10.4; S(6): 76.0; S(7): 10.4; S(8): 1.5; S(10): 0.2; S(16): 1.5; T(21): 0.0; T(27): 0.0                                    | 0,34  | -0,77 | -0,35 | 0,44  |
| Map2   | P20357   | YTVPLPSPVQDSENLSGEGSFYEGTDDK     | Y(1): 0.0; T(2): 0.0; S(7): 99.7; S(12): 0.2; S(16): 0.0; S(19): 0.0; S(21): 0.0; Y(23): 0.0; T(26): 0.0                         | -0,54 | 0,75  | -0,62 | 0,10  |
| Map6d1 | Q149S1   | LLSEVEELNMSLR                    | S(3): 2.5; S(11): 97.5                                                                                                           | -0,83 | 0,09  | 0,47  | -0,73 |

|         |          |                               |                                                                                                                       |       |       |       |       |
|---------|----------|-------------------------------|-----------------------------------------------------------------------------------------------------------------------|-------|-------|-------|-------|
| Map6d1  | Q14BB9   | SDVAVPLTLHGYSYDPGSEESGADCSVSR | S(1): 0.0; T(8): 0.0; Y(12): 0.4; S(13): 0.4; S(17): 49.2; S(20): 49.2; S(25): 0.4; S(27): 0.4                        | -0,76 | -0,19 | 0,01  | 0,32  |
| Mark1   | Q8VHG2   | DTTVISHSPNTSYDTALEAR          | T(2): 0.0; T(3): 0.0; S(6): 0.0; S(8): 100.0; T(11): 0.0; S(12): 0.0; Y(13): 0.0; T(15): 0.0                          | 1,65  | -1,70 | 0,48  | -0,49 |
| Mark1   | Q8VHJ5   | KPPEFEGGESLSSGSLCQR           | S(10): 0.3; S(12): 48.1; S(13): 48.1; S(15): 3.6                                                                      | 0,26  | -0,20 | -0,04 | 0,55  |
| Mtfr1l  | Q9CW07   | SFSLPADPILQAAK                | S(1): 3.8; S(3): 96.2                                                                                                 | -1,06 | 0,17  | -0,56 | 0,09  |
| Otud7a  | Q8R554   | AAPGTGGPTPGRSPPAPAR           | T(5): 0.0; T(9): 0.0; S(13): 100.0                                                                                    | 0,55  | 0,00  | 0,29  | -0,46 |
| Otud7a  | Q8R554   | TVNTVESLAPGGADAPGPAEHK        | T(1): 50.0; T(4): 50.0; S(7): 0.0                                                                                     | 0,04  | 0,17  | 0,03  | 0,31  |
| Otud7a  | Q8R550   | SIEVENDFLPVEK                 | S(1): 100.0                                                                                                           | -0,02 | -0,45 | -0,44 | 0,44  |
| Pcdh1   | F7BJK1   | SNSPLSIQLQPQSPSASK            | S(1): 0.0; S(3): 0.0; S(7): 0.0; S(14): 47.4; S(16): 47.4; S(18): 5.2                                                 | -0,12 | -0,13 | 0,47  | -0,20 |
| Pcdh1   | F7BJK1   | IHLPLNYPPGSPDLGR              | Y(7): 0.0; S(11): 100.0                                                                                               | -0,75 | 0,31  | -0,16 | -0,19 |
| Pclo    | Q9QYX7   | SEGITKPSLQQPSPK               | S(1): 0.0; T(5): 0.0; S(8): 0.0; S(13): 100.0                                                                         | -0,30 | 0,27  | 0,74  | -0,80 |
| Pclo    | Q9QYX7   | SHSSQNSQQSPKPSVIK             | S(1): 0.0; S(3): 0.0; S(4): 0.0; S(7): 0.5; S(10): 99.5; S(14): 0.0                                                   | -0,04 | 0,01  | 0,24  | 0,34  |
| Pclo    | Q9QYX7   | KIVDSGVQTDDEETADR             | S(5): 0.1; T(9): 99.9; T(14): 0.0                                                                                     | 0,55  | 0,03  | 0,22  | -0,04 |
| Pclo    | Q9QYX7   | KDSFSQESSPSSPSDLAK            | S(3): 0.0; S(5): 0.0; S(8): 0.0; S(9): 0.0; S(11): 6.7; S(12): 86.5; S(14): 6.7                                       | 0,08  | 0,11  | 0,14  | 0,44  |
| Pclo    | Q9QYX7   | SMSDPKPLSPTADESSR             | S(1): 0.5; S(3): 99.5; S(9): 0.0; T(11): 0.0; S(15): 0.0; S(16): 0.0                                                  | 0,40  | -0,48 | 0,07  | 0,07  |
| Pclo    | Q9QYX7   | LPTAVSLYSPTDEQSVMQK           | T(3): 0.0; S(6): 0.0; Y(8): 0.0; S(9): 50.0; T(11): 50.0; S(15): 0.0                                                  | 0,17  | -0,59 | 0,06  | -0,24 |
| Pclo    | Q9QYX7   | GGSLGCQTETDPTQSPPYMGATSPPKDK  | S(3): 0.0; T(8): 0.0; T(10): 0.0; T(14): 20.0; S(16): 20.0; Y(19): 20.0; T(23): 20.0; S(24): 20.0                     | -0,97 | 0,52  | -0,10 | 0,16  |
| Pclo    | Q9QYX7   | GAHAHSGPTSAGSSSVSPGQPGSPSVSK  | S(6): 0.0; T(9): 0.7; S(10): 0.0; S(13): 0.0; S(14): 0.0; S(15): 0.0; S(18): 0.0; S(24): 98.6; S(26): 0.7; S(28): 0.0 | -0,03 | 0,19  | -0,11 | 0,44  |
| Pclo    | Q9QYX7   | SPVPSQQASPK                   | S(1): 0.0; S(5): 0.0; S(9): 100.0                                                                                     | 0,38  | -0,48 | -0,15 | 0,26  |
| Pclo    | Q9QYX7   | TQPQKVSPQPDQKQK               | T(1): 0.2; S(7): 99.8                                                                                                 | -0,05 | 0,31  | -0,20 | 0,47  |
| Phkb    | Q7TQH0-2 | EVDGLLTSDFMGSPVSSK            | T(7): 0.0; S(8): 0.0; S(13): 99.8; S(16): 0.2; S(17): 0.0                                                             | 1,35  | -0,93 | -0,38 | 0,27  |
| Pnpo    | Q91WH7   | VDNSSLTGESEPQTRSPECTHESPLETR  | S(4): 0.0; S(5): 0.0; T(7): 0.2; S(10): 0.7; T(14): 77.4; S(16): 15.3; T(20): 3.2; S(23): 3.2; T(27): 0.0             | -1,07 | 0,21  | 0,56  | -0,12 |
| Pnpo    | Q91XF0   | GLATGDSPLGPMTHHGEEDWVYER      | T(4): 0.3; S(7): 99.7; T(13): 0.0; Y(22): 0.0                                                                         | -0,79 | 0,34  | 0,42  | -0,63 |
| Ppme1   | Q8BVL3   | VTSSVPLPSGGTSSPSR             | T(2): 0.0; S(3): 0.0; S(4): 0.0; S(9): 0.5; T(12): 6.3; S(13): 80.5; S(14): 6.3; S(16): 6.3                           | -0,58 | 0,31  | -0,38 | 0,38  |
| Ppp1r1b | Q60829   | AVQHLQITNSLSENQASEEDELGELR    | T(7): 0.0; S(9): 0.0; S(12): 0.0; S(17): 100.0                                                                        | -0,56 | 0,91  | 0,65  | -0,01 |
| Ppp1r1b | Q60829   | RPNPCAYTPPSLK                 | Y(7): 0.0; T(8): 100.0; S(11): 0.0                                                                                    | 1,04  | -1,14 | 0,04  | -0,38 |
| Ppp1r1b | Q60823   | YFDEFQTAQSITITPPDR            | Y(1): 0.0; T(7): 0.0; S(10): 0.0; T(12): 0.2; T(14): 99.8                                                             | 0,90  | -0,06 | -0,66 | 0,54  |
| Ppp1r9b | Q6R5C6   | NQALEMLSR                     | S(8): 100.0                                                                                                           | 0,55  | 0,44  | 0,66  | -0,42 |
| Ppp1r9b | Q6R891   | ASSLNENVDSALLK                | S(2): 0.3; S(3): 99.7; S(11): 0.0                                                                                     | -0,18 | 0,12  | -0,01 | -0,06 |
| Pri8a1  | Q9DA80   | VSSQPAPSQER                   | S(2): 50.0; S(3): 50.0; S(8): 0.0                                                                                     | 0,47  | -0,50 | 0,48  | -0,01 |
| Rmdn3   | Q3UJU9   | SHSLPNSLDYQAASER              | S(1): 0.0; S(3): 100.0; S(7): 0.0; Y(10): 0.0; S(14): 0.0                                                             | 0,00  | 0,07  | 0,68  | -0,58 |
| Rmdn3   | Q3UID0   | DMDEPSPVNPVEEVLTK             | S(6): 100.0; T(15): 0.0                                                                                               | -1,02 | 0,57  | 0,30  | -0,54 |
| Rtn1    | Q8K0T0   | GSVSEDELIAAIK                 | S(2): 3.4; S(4): 96.6                                                                                                 | 0,64  | -0,72 | 0,48  | -0,53 |
| Sec22b  | O08547   | NLGSINTELQDVQR                | S(4): 93.0; T(7): 7.0                                                                                                 | 1,10  | -0,76 | 0,87  | 0,02  |
| Sgip1   | Q8VD37   | LPSISDLDSIFGPVLSPK            | S(3): 0.0; S(5): 0.0; S(9): 0.0; S(16): 100.0                                                                         | 0,00  | 0,05  | 0,76  | -0,15 |
| Sgip1   | Q8VCY8-2 | LSPWEDLSQAPTMDSPLEK           | S(2): 0.0; S(8): 0.0; T(12): 0.4; S(15): 99.6                                                                         | 1,34  | -1,54 | -0,70 | 0,03  |
| Sipa1l1 | Q8C0T5   | LIDLESPTPESQK                 | S(6): 99.7; T(8): 0.3; S(11): 0.0                                                                                     | -0,33 | 0,11  | 1,30  | -1,29 |
| Sipa1l1 | Q8C0T5   | QDPVVHLSPNK                   | S(8): 100.0                                                                                                           | 2,16  | -2,31 | -0,04 | -0,49 |
| Sirt2   | Q8VDQ8-2 | EHANIDAQSGSQAPNPSTTISPGK      | S(9): 0.0; S(11): 0.0; S(17): 0.0; T(18): 0.0; T(19): 0.0; S(21): 100.0                                               | -0,43 | 0,43  | 1,09  | -0,55 |

|         |          |                                |                                                                                             |       |       |       |       |
|---------|----------|--------------------------------|---------------------------------------------------------------------------------------------|-------|-------|-------|-------|
| Sirt2   | Q8VDQ8-2 | EHANIDAQSGSQAPNPSTTISPGKSPPPAK | S(9): 0.0; S(11): 0.0; S(17): 0.0; T(18): 0.0; T(19): 0.0; S(21): 0.0; S(25): 100.0         | -0.96 | 0.51  | 0.22  | 0.17  |
| Syn1    | O88935   | QSRPVAGGPGAPPAARPPASPSPQR      | S(2): 0.0; S(20): 50.0; S(22): 50.0                                                         | -0.34 | -0.11 | 0.47  | -0.29 |
| Syn1    | O88935   | QSRPVAGGPGAPPAARPPASPSPQR      | S(2): 0.0; S(20): 1.3; S(22): 98.7                                                          | -0.27 | -0.14 | 0.46  | -0.16 |
| Syn1    | O88935   | LPSPTAAPQSQASQATPVTQGGQR       | S(3): 99.4; T(5): 0.6; S(11): 0.0; S(13): 0.0; T(16): 0.0; T(19): 0.0                       | 0.50  | -0.13 | 0.35  | -0.84 |
| Syn1    | O88935   | DASPGRGSQSSSPGALTLGR           | S(3): 100.0; S(8): 0.0; S(10): 0.0; S(12): 0.0; S(13): 0.0; S(14): 0.0; T(19): 0.0          | 0.21  | 0.10  | 0.28  | 0.33  |
| Syngap1 | F6SEU4   | DLNSSIDLQSFMAR                 | S(4): 0.3; S(5): 99.7; S(10): 0.0                                                           | -0.62 | -0.27 | 0.61  | -0.13 |
| Syngap1 | F6SEU4   | SSPAYCTSSSDITEPEQK             | S(1): 0.1; S(2): 0.4; Y(5): 3.5; T(7): 30.9; S(8): 3.5; S(9): 30.9; S(10): 30.9; T(13): 0.0 | 0.13  | -0.52 | 0.39  | -0.39 |
| Syngap1 | F6SEU4   | EGSIGGSGSGGGGGGLKPSITK         | S(3): 0.0; S(7): 33.2; S(10): 33.2; S(21): 33.2; T(23): 0.3                                 | -0.96 | 0.32  | 0.22  | 0.03  |
| Syngap1 | F6SEU4   | GPSAEMQGYMMR                   | S(3): 100.0; Y(9): 0.0                                                                      | -0.25 | -0.05 | -0.03 | 0.36  |
| Synj1   | E9Q7S0   | TPGPPSQGSPVDTQPAQK             | T(1): 0.0; S(6): 0.7; S(7): 7.6; S(10): 91.7; T(14): 0.0                                    | 0.28  | 0.00  | 0.65  | -0.42 |
| Synj1   | E9Q7S0   | TPGPPSQGSPVDTQPAQK             | T(1): 0.0; S(6): 1.3; S(7): 10.2; S(10): 87.2; T(14): 1.3                                   | 0.47  | -0.19 | 0.54  | -0.78 |
| Tmem163 | Q8C996   | GHAPSTAAPAPSPAPMSSSVQSDEER     | S(5): 0.0; T(6): 0.0; S(12): 0.0; S(17): 0.0; S(18): 0.0; S(19): 0.0; S(22): 100.0          | -0.02 | 0.24  | 0.56  | -0.35 |
| Tmem163 | Q8C996   | GHAPSTAAPAPSPAPMSSSVQSDEER     | S(5): 0.0; T(6): 0.0; S(12): 0.0; S(17): 84.4; S(18): 7.5; S(19): 0.7; S(22): 7.5           | -1.36 | 0.86  | -0.23 | -0.22 |
| Tmsb4x  | P20065-2 | TETQEKNPLPSK                   | T(1): 0.0; T(3): 100.0; S(11): 0.0                                                          | -0.63 | 0.15  | -0.37 | -0.36 |
| Tp53bp1 | P70399   | GREDAVAEDVCIDLTCDSGSQAVSPATR   | T(15): 0.0; S(18): 0.0; S(20): 0.0; S(25): 99.3; T(28): 0.7                                 | -0.60 | 0.71  | 0.15  | -0.73 |
| Tp53bp1 | P70399   | ASQEPFSPAEDVMETDLLEGLAANQDRPSK | S(2): 0.0; S(7): 1.4; T(15): 98.6; S(29): 0.0                                               | 0.14  | 0.10  | -0.38 | 0.23  |
| Trank1  | Q8BT18   | SGTPPRPGSVTNMQADECTATPQR       | S(1): 0.0; T(3): 100.0; S(9): 0.0; T(11): 0.0; T(19): 0.0; T(21): 0.0                       | 0.45  | -0.13 | -0.54 | -0.01 |
| Trappc8 | E9PWG2   | NSDSNLLSLDGLDNEVK              | S(2): 50.0; S(4): 50.0; S(8): 0.1                                                           | 0.50  | -0.58 | -0.43 | 0.26  |
| Trim3   | Q3B7Z2   | GATVLPANPPGSAGSGK              | T(3): 100.0; S(12): 0.0; S(15): 0.0                                                         | -0.87 | 0.71  | -0.39 | -0.08 |
| Twf1    | Q91YM2   | AGSPLCNSNLQDSEEDVEPPSYHLFR     | S(3): 100.0; S(8): 0.0; S(13): 0.0; S(21): 0.0; Y(22): 0.0                                  | -0.64 | 0.32  | -0.55 | -0.08 |
| Uqcrh   | P99028   | SQTEEDCTEELFDLHAR              | S(1): 8.2; T(3): 91.8; T(8): 0.0                                                            | -0.50 | 0.55  | 0.57  | 0.07  |
| Usp10   | P52479-2 | TCDSPQNPVDFISGVPDSPFPR         | T(1): 11.1; S(4): 88.9; S(13): 0.0; S(19): 0.0                                              | 0.80  | 0.04  | -0.39 | 0.41  |
| Usp45   | E9Q4D8   | ISLSSAPQLEPLVVELSSPGPLTSALFL   | S(2): 69.4; S(4): 15.3; S(5): 15.3; S(17): 0.0; S(18): 0.0; T(23): 0.0; S(24): 0.0          | 1.04  | 0.07  | -0.53 | 0.31  |
| Xrn2    | Q9DB05   | AIDIYEQVGTSAMDSPLLK            | Y(5): 0.0; T(10): 0.0; S(11): 0.0; S(15): 100.0                                             | 0.60  | -1.65 | -1.33 | 0.96  |
| Yap1    | P46938-2 | QSSFEIPDDVPLPAGWEMAK           | S(2): 0.5; S(3): 99.5                                                                       | 0.59  | 0.30  | 0.16  | 0.19  |
| Yap1    | P46938-2 | GDSETDLEALFNAVMPNK             | S(3): 50.0; T(5): 50.0                                                                      | 0.67  | -0.41 | -0.57 | 0.25  |
| Ywhaz   | P63101   | TAFDEAIAELDTLSEESYK            | T(1): 0.0; T(12): 0.0; S(14): 100.0; S(17): 0.0; Y(18): 0.0                                 | 0.86  | -1.02 | 1.19  | -1.35 |

**Supplementary Table S9: Common proteins up and down phosphorylated in cerebellum of Tg(*Dyrk1a*) and Ts65Dn mice, and reverted by L41 treatment.**

| Gene name | Protein Group Accessions | Sequence                         | phosphoRS Site Probabilities                                                                                          | Ts65Dn vs WT | Ts65Dn +/-L41 | TgDyrk1A vs WT | TgDyrk1A +/-L41 |
|-----------|--------------------------|----------------------------------|-----------------------------------------------------------------------------------------------------------------------|--------------|---------------|----------------|-----------------|
| Aak1      | Q3UJH0-2                 | STQLLQAAAAEASLNK                 | S(1): 50.0; T(2): 50.0; S(13): 0.0                                                                                    | 0,00         | 1,00          | -0,32          | 0,66            |
| Aak1      | Q3UJH0-2                 | ILSDVTHSAVFGVPASK                | S(3): 4.6; T(6): 47.7; S(8): 47.7; S(16): 0.0                                                                         | 0,77         | -0,03         | -0,61          | 0,18            |
| Aak1      | Q3UJH0-2                 | EQGSSGLGSGSSGGGSSGLGSGYIGR       | S(4): 0.0; S(5): 0.0; S(9): 47.3; S(11): 47.3; S(12): 5.5; S(17): 0.0; S(18): 0.0; S(19): 0.0; S(23): 0.0; Y(25): 0.0 | -0,32        | 0,08          | -0,76          | 0,66            |
| Acot11    | Q8VHQ9                   | SISHPESGDPPTMAEGEGYR             | S(1): 100.0; S(3): 0.0; S(7): 0.0; T(12): 0.0; Y(19): 0.0                                                             | -0,02        | -0,30         | 2,75           | -2,76           |
| Acot11    | Q8VHQ9                   | KSISHPESGDPPTMAEGEGYR            | S(2): 50.0; S(4): 50.0; S(8): 0.0; T(13): 0.0; Y(20): 0.0                                                             | -0,38        | -0,01         | -0,03          | 0,12            |
| Akap12    | Q9WTQ5                   | QSQVTEEEAAAQTEGPSTPSSFPAQEEHR    | S(2): 0.0; T(5): 0.0; T(14): 0.0; S(18): 92.3; T(19): 7.7; S(21): 0.0; S(22): 0.0                                     | -0,15        | 0,05          | 0,52           | -1,14           |
| Akap12    | Q9WTQ5                   | QAQSSTEIPLQAESGQGTETEEAAKDGEEENR | S(4): 33.3; S(5): 33.3; T(6): 33.3; S(14): 0.0; T(18): 0.0                                                            | -0,60        | 0,31          | 0,43           | -0,04           |
| Akap12    | Q9WTQ5                   | SATLSSTESTASGMQDEVR              | S(1): 0.0; T(3): 0.0; S(5): 0.0; S(6): 0.0; T(7): 0.0; S(9): 0.0; T(10): 0.0; S(12): 100.0                            | 0,10         | -0,12         | 0,39           | -0,09           |
| Akap12    | Q9WTQ5                   | AEPEILELESK                      | S(10): 100.0                                                                                                          | -0,07        | -0,20         | -0,52          | 0,39            |
| Akt1      | P31750                   | SGSPSDNSGAEMEVS LAKPK            | S(1): 0.0; S(3): 99.0; S(5): 0.9; S(8): 0.0; S(16): 0.0                                                               | -0,46        | 0,13          | -0,43          | 0,23            |
| Akt2      | Q60823                   | YFDDEFTAQSITITPPDRYDSLPLELDQR    | Y(1): 0.0; T(7): 0.8; S(10): 96.6; T(12): 0.8; T(14): 0.8; Y(19): 0.8; S(21): 0.0                                     | 0,54         | -0,15         | 0,30           | -0,07           |
| Akt2      | Q60823                   | YFDDEFTAQSITITPPDR               | Y(1): 0.0; T(7): 0.0; S(10): 0.0; T(12): 0.1; T(14): 99.9                                                             | 0,31         | 0,01          | -0,37          | 0,14            |
| Akt2      | Q91VE4                   | TSLGTEQHAAAAAASVACR              | T(1): 0.1; S(2): 0.5; T(5): 99.3; S(18): 0.0                                                                          | 0,28         | 0,08          | -0,51          | 0,63            |
| Amph      | Q7TQF7                   | TPSPPEEPSPLPSTASPNTLAPASPAPVRPR  | T(1): 2.9; S(3): 95.8; S(9): 0.6; S(13): 0.6; T(15): 0.1; S(17): 0.0; T(21): 0.0; S(26): 0.0                          | 0,49         | -0,29         | 0,31           | 0,33            |
| Amph      | Q7TQF7                   | AFSIQGAPSDSGPLR                  | S(3): 0.0; S(9): 7.2; S(11): 92.8                                                                                     | 0,20         | -0,32         | -0,37          | 0,45            |
| Ap3d1     | O54774                   | VDIITEEMPENALPSDEDDKDPNDPYR      | T(5): 0.0; S(15): 100.0; Y(26): 0.0                                                                                   | 0,07         | 0,15          | -0,18          | -0,32           |
| Ap3d1     | O54774                   | HSSLPTESDEDIAPAQR                | S(2): 0.0; S(3): 0.0; T(6): 0.0; S(8): 100.0                                                                          | -0,01        | 0,41          | -0,24          | -1,08           |
| Ap3d1     | O54774                   | VDIITEEMPENALPSDEDDKDPNDPYR      | T(5): 0.0; S(15): 100.0; Y(26): 0.0                                                                                   | 0,32         | 0,29          | -0,36          | 0,33            |
| Ap3d1     | O54774                   | VDIITEEMPENALPSDEDDKDPNDPYR      | T(5): 0.0; S(15): 100.0; Y(26): 0.0                                                                                   | -0,35        | 0,71          | -1,60          | -0,41           |
| Arfgap1   | Q9EPJ9-2                 | NSNSDGWESWEGASGEGR               | S(2): 0.1; S(4): 99.9; S(9): 0.0; S(14): 0.0                                                                          | -0,25        | 0,80          | 0,07           | -0,64           |
| Arfgap1   | Q9EPJ9-2                 | AKSPSSDSWTCADASTGR               | S(3): 100.0; S(5): 0.0; S(6): 0.0; S(8): 0.0; T(10): 0.0; S(15): 0.0; T(16): 0.0                                      | 0,02         | 0,09          | 0,06           | 0,69            |
| Arfgap1   | Q9EPJ9-2                 | RSSDSWDVWGSASNNK                 | S(2): 33.3; S(3): 33.3; S(5): 33.3; S(11): 0.0; S(13): 0.0; S(15): 0.0                                                | -0,43        | 0,93          | -0,10          | 0,11            |
| Arfgap1   | Q9EPJ9-2                 | RSSDSWDVWGSASNNK                 | S(2): 5.7; S(3): 88.5; S(5): 5.7; S(11): 0.0; S(13): 0.0; S(15): 0.0                                                  | -0,23        | 0,02          | -0,13          | 0,01            |
| Arfgap1   | Q9EPJ9-2                 | NSNSDGWESWEGASGEGR               | S(2): 0.0; S(4): 100.0; S(9): 0.0; S(14): 0.0                                                                         | -0,15        | 0,38          | -0,60          | -0,41           |
| Arhgap21  | B7ZCJ1                   | RNSEGSEASCTEGLTSLDSR             | S(3): 91.9; S(6): 8.1; S(9): 0.0; T(11): 0.0; S(14): 0.0; T(16): 0.0; S(18): 0.0; S(21): 0.0                          | 0,65         | -0,38         | 0,13           | -0,70           |
| Arhgap21  | B7ZCJ1                   | TRSWDYIEGQTEATVNSESIQIPDSNGER    | T(1): 49.8; S(3): 49.8; Y(6): 0.4; T(11): 0.0; T(14): 0.0; T(16): 0.0; S(19): 0.0; S(21): 0.0; S(26): 0.0             | 0,08         | -0,28         | 0,04           | -0,52           |
| Arhgap21  | B7ZCJ1                   | DQGEVPSPEDEPFVWPGPK              | S(7): 100.0; S(9): 0.0; S(15): 0.0                                                                                    | -0,42        | -0,07         | -0,49          | -0,04           |
| Arhgef12  | Q8R4H2                   | SEGVQDAEPQSLVGSSTR               | S(1): 0.0; S(11): 0.0; S(15): 83.9; S(17): 8.0; T(18): 8.0                                                            | 0,44         | 0,03          | 0,40           | -0,16           |
| Arhgef12  | F8VQN6                   | SEGVQDAQEPQSLVGSSTR              | S(1): 0.0; S(12): 10.9; S(16): 67.4; S(18): 10.9; T(19): 10.9                                                         | 0,45         | -0,31         | -0,05          | -0,26           |
| Arvcf     | P98203-2                 | SLAADDEGGPDLEPDYSTATR            | S(1): 100.0; Y(16): 0.0; S(17): 0.0; T(18): 0.0; T(20): 0.0                                                           | -1,31        | 0,64          | -0,38          | -0,34           |
| Atp1a3    | Q6PIC6                   | CIELSSGSVK                       | S(5): 0.2; S(6): 49.9; S(8): 49.9                                                                                     | -0,19        | 0,13          | 0,41           | -0,26           |
| Atp1a3    | Q6PIC6                   | SPDCTHDNPLETR                    | S(1): 100.0; T(5): 0.0; T(12): 0.0                                                                                    | 0,40         | -0,21         | 0,25           | -0,31           |
| Atp1a3    | Q6PIC6                   | DVAGDASESALLK                    | S(7): 100.0; S(9): 0.0                                                                                                | 0,41         | 0,24          | -0,08          | 0,49            |
| Brsk1     | Q5RJI5                   | SPVFSFSPEPGAGDEAR                | S(1): 100.0; S(5): 0.0; S(7): 0.0                                                                                     | -0,07        | -0,03         | 0,47           | -0,07           |
| Brsk1     | Q5RJI5                   | SSGGTPLHSLHTPR                   | S(1): 0.0; S(2): 0.0; T(5): 0.0; S(9): 100.0; T(13): 0.0                                                              | -0,42        | 0,17          | 0,19           | -0,18           |

|         |          |                                 |                                                                                                                                 |       |       |       |       |
|---------|----------|---------------------------------|---------------------------------------------------------------------------------------------------------------------------------|-------|-------|-------|-------|
| Bsn     | Q8VDQ8-2 | EHANIDAQSGSQAPNPSTTISPGK        | S(9): 0.0; S(11): 0.0; S(17): 0.0; T(18): 0.0; T(19): 0.0; S(21): 100.0                                                         | 0,14  | -0,42 | 0,27  | -0,44 |
| Bsn     | O88737   | SSVSQSPAPTYPSDSHYTSLEQNVPR      | S(1): 0.0; S(2): 0.0; S(4): 1.2; S(6): 98.8; T(10): 0.0; Y(11): 0.0; S(13): 0.0; S(15): 0.0; Y(17): 0.0; T(18): 0.0; S(19): 0.0 | -0,04 | 0,50  | 0,09  | 0,04  |
| Bsn     | O88737   | SPQVLYSPVSPLSPHR                | S(1): 0.0; Y(6): 0.0; S(7): 0.0; S(10): 5.6; S(13): 94.4                                                                        | 0,54  | -0,93 | 0,01  | -0,37 |
| Bsn     | O88737   | TLPSPPPEEAHLPLAGVPSQLYAASLLQR   | T(1): 0.9; S(4): 99.1; S(20): 0.0; Y(23): 0.0; S(26): 0.0                                                                       | -0,40 | 0,31  | -0,15 | 0,08  |
| Bsn     | O88737   | EPELEMESLTGSPEDR                | S(8): 4.7; T(10): 47.6; S(12): 47.6                                                                                             | -0,62 | 0,49  | -0,19 | -0,21 |
| Bsn     | O88737   | LYSSMSDTNLAEAGLNYHAQR           | Y(2): 48.0; S(3): 48.0; S(4): 0.3; S(6): 3.7; T(8): 0.0; Y(17): 0.0                                                             | -0,41 | -0,14 | -0,22 | 0,39  |
| Bsn     | O88737   | SADCSVQTDDEDNADWEQPVR           | S(1): 0.0; S(5): 0.0; T(8): 100.0                                                                                               | -0,28 | 0,38  | -0,47 | 0,59  |
| Bsn     | O88737   | RPHLSITPEAFDSDEELGDILEEDDSLAWGR | S(4): 0.0; S(6): 0.0; T(8): 0.0; S(14): 100.0; S(27): 0.0                                                                       | 0,19  | 0,32  | -1,33 | 1,00  |
| Cacna1g | P39061-2 | QTVSVPGGPPGPPGPPGAMGASAGQVR     | T(2): 6.0; S(4): 93.5; S(24): 0.5                                                                                               | 1,06  | -0,23 | -0,14 | -0,13 |
| Cacna1g | Q5SUF8   | SESEPDFFSVDGDGDR                | S(1): 0.0; S(3): 100.0; S(9): 0.0; S(11): 0.0                                                                                   | 0,34  | 0,61  | -0,74 | 0,89  |
| Cacna1g | F6RJ39   | APVVLQPEQIVSEETPPPLTK           | S(12): 0.0; T(16): 100.0; T(22): 0.0                                                                                            | -0,67 | 0,61  | -1,34 | 0,92  |
| Camsap2 | Q8C1B1   | SESVGFLSPSR                     | S(1): 0.0; S(3): 0.0; S(9): 99.7; S(11): 0.3                                                                                    | 0,00  | -0,23 | 0,67  | -0,39 |
| Camsap2 | Q8C1B1   | LNQSSPDNLTDTK                   | S(4): 94.4; S(5): 5.6; T(10): 0.0; T(12): 0.0                                                                                   | -0,35 | 0,16  | 0,30  | -0,08 |
| Camsap2 | Q8C1B1   | SVSNEGLTLNNSR                   | S(1): 0.0; S(3): 100.0; T(8): 0.0; S(12): 0.0                                                                                   | 0,11  | -0,39 | 0,00  | 0,25  |
| Caskin1 | Q6P9K8-2 | HISSSQELLGDGPPGSPMSR            | S(3): 6.2; S(4): 6.2; S(5): 87.6; S(18): 0.0; S(21): 0.0                                                                        | -0,16 | 0,37  | 1,09  | -0,91 |
| Caskin1 | Q6P9K8-2 | SQEYLLDEGMAGTPPKVVR             | S(1): 0.0; Y(4): 0.0; T(14): 100.0                                                                                              | 0,05  | -0,43 | -0,01 | -0,40 |
| Caskin1 | Q6P9K8-2 | SVSESSPGDSPVKPEGSSGAAR          | S(1): 0.0; S(3): 0.0; S(5): 0.0; S(6): 0.0; S(10): 100.0; S(18): 0.0; S(19): 0.0                                                | -0,46 | 0,29  | -0,14 | -0,12 |
| Caskin1 | Q6P9K8-2 | AQPGSPQALGGPHGPATAK             | S(5): 100.0; T(17): 0.0                                                                                                         | -0,02 | 0,14  | -0,58 | -0,04 |
| Caskin2 | Q8VHK1   | VGLSPDPAGDRNSVGSEGSVGSIR        | S(4): 99.0; S(7): 1.0; S(14): 0.0; S(17): 0.0; S(20): 0.0; S(23): 0.0                                                           | -0,42 | 0,26  | -0,46 | -0,10 |
| Ckb     | Q04447   | RGTGGVDTAAVGGVFDVSNADR          | T(3): 100.0; T(8): 0.0; S(18): 0.0                                                                                              | 0,75  | -0,41 | 0,31  | -0,27 |
| Ckb     | Q04447   | RGTGGVDTAAVGGVFDVSNADR          | T(3): 97.0; T(8): 3.0; S(18): 0.0                                                                                               | 0,67  | -0,27 | -0,73 | -0,04 |
| Clns1a  | Q923F1   | LGEESKEPLSDEDEEDNDVEPISEFR      | S(5): 0.0; S(10): 100.0; S(24): 0.0                                                                                             | 0,99  | -0,29 | 0,50  | 0,29  |
| Coro1a  | O89053   | RATPEPSGTSSDVTSR                | T(3): 99.8; S(7): 0.1; T(9): 0.0; S(11): 0.0; S(12): 0.0; T(14): 0.0; S(16): 0.0                                                | 1,14  | -1,00 | 0,53  | -0,03 |
| CR025   | Q8BH50   | RDSSSQLASTESDKPTTGR             | S(3): 50.0; S(4): 50.0; S(6): 0.0; S(10): 0.0; T(11): 0.0; S(13): 0.0; T(17): 0.0; T(18): 0.0                                   | -0,45 | 0,92  | -0,79 | -0,24 |
| Cstf2t  | Q8C7E9   | QGGGQPSFSPGQSQVTPQDQEK          | S(7): 0.0; S(8): 0.0; S(10): 99.9; S(14): 0.0; T(17): 0.0                                                                       | -0,41 | 1,02  | 0,64  | -0,46 |
| Ctage5  | H3BK44   | AFLSPPTLLEGLR                   | S(4): 99.3; T(7): 0.7                                                                                                           | 1,34  | -0,37 | 1,18  | -0,37 |
| Dagla   | Q6WQJ1   | DEGHLFYIDPAIPEENPSLSSR          | Y(7): 0.0; S(18): 33.3; S(20): 33.3; S(21): 33.3                                                                                | -0,05 | 0,29  | 0,27  | -0,45 |
| Dagla   | Q6WQJ1   | LLSPVAAAASAR                    | S(3): 100.0; S(9): 0.0                                                                                                          | -0,37 | -0,12 | -0,38 | 0,28  |
| Dbi     | Q4VWZ5   | TQPTDEMLFIYSHFK                 | T(1): 0.0; T(4): 0.0; Y(12): 95.8; S(13): 4.2                                                                                   | 0,45  | -0,23 | -0,38 | 0,33  |
| Dclk1   | Q9JLM8   | SKSPASTSSVNGTPGSQLSTPR          | S(1): 49.2; S(3): 49.2; S(6): 0.5; T(7): 0.5; S(8): 0.5; S(9): 0.0; T(13): 0.0; S(16): 0.0; S(19): 0.0; T(20): 0.0              | -0,46 | -0,06 | 0,43  | 0,25  |
| Dclk1   | Q9JLM8   | AQPAPPELNSESEDYSPSSSETVR        | S(10): 0.0; S(12): 0.0; Y(15): 1.3; S(16): 94.8; S(18): 1.3; S(19): 1.3; S(20): 1.3; T(22): 0.2                                 | -0,17 | 0,18  | 0,14  | -0,78 |
| Dclk1   | Q9JLM8   | REESEEGFQIPATITER               | S(4): 100.0; T(13): 0.0; T(15): 0.0                                                                                             | 0,42  | -0,10 | -0,11 | -0,76 |
| Dclk1   | Q9JLM8   | VCSSMDENDGPGEGDELGR             | S(3): 50.0; S(4): 50.0                                                                                                          | 0,32  | 0,38  | -0,56 | -0,45 |
| Dmtn    | Q9WV69   | LQSTEFSPSGSEAGSPGLQNGEGQR       | S(3): 46.9; T(4): 46.9; S(7): 6.1; S(9): 0.1; S(11): 0.0; S(15): 0.0                                                            | 0,45  | -0,27 | -0,37 | -0,12 |
| Dmnl2   | Q8BPN8-2 | RQSESAAPPVASEMDK                | S(3): 92.1; S(5): 7.9; S(13): 0.0                                                                                               | 0,01  | -0,80 | 0,25  | 0,44  |
| Dmnl2   | Q8BPN8-2 | RQSESAAPPVASEMDK                | S(3): 50.0; S(5): 50.0; S(13): 0.0                                                                                              | 1,00  | -1,10 | -0,10 | 0,43  |
| Dmnl2   | Q8BPN8-2 | ALLTPQDEECADGDTVDVIAEQLK        | T(4): 99.3; T(15): 0.7                                                                                                          | 0,12  | -0,55 | -1,02 | 0,42  |
| Dmnl2   | Q8C7U1   | AQLLHALSLDEGGPEPSLSDSSGGSGFR    | S(8): 0.8; S(17): 58.2; S(19): 12.6; S(21): 12.6; S(22): 12.6; S(23): 3.0; S(26): 0.2                                           | 0,69  | -0,93 | -0,95 | 0,99  |
| Dnajc6  | Q80TZ3   | TATSASAPTLR                     | T(1): 0.0; T(3): 0.0; S(4): 0.0; S(6): 0.5; S(8): 99.5; T(10): 0.0                                                              | -0,06 | -0,46 | 0,07  | -0,01 |
| Dnajc6  | Q80TZ3   | GASSPDMEPSYGGGLFDMVK            | S(3): 0.4; S(4): 99.6; S(10): 0.0; Y(11): 0.0                                                                                   | -0,46 | -0,04 | -0,64 | 0,27  |
| Dock4   | P59764   | NSAPASMPDGTR                    | S(2): 0.0; S(6): 8.8; S(8): 91.2; T(12): 0.0                                                                                    | 0,06  | 0,00  | 0,60  | -0,59 |



|         |          |                                    |                                                                                                                     |       |       |       |       |
|---------|----------|------------------------------------|---------------------------------------------------------------------------------------------------------------------|-------|-------|-------|-------|
| Dock4   | P59764   | ASPLLSDK                           | S(2): 100.0; S(6): 0.0                                                                                              | -0.73 | 0.59  | -0.76 | 0.25  |
| Dsg2    | O55111   | LDLSIIVTNK                         | S(4): 100.0; T(8): 0.0                                                                                              | 0.41  | 0.00  | 0.43  | 0.07  |
| Efh2    | Q8C845   | ADLNQGIGEPQSPSRR                   | S(12): 98.8; S(14): 1.2                                                                                             | 1.57  | -1.47 | 0.58  | -0.51 |
| Eif4b   | Q8BGD9   | ARPTTDSFDDYPPR                     | T(4): 0.0; T(5): 0.0; S(7): 100.0; Y(11): 0.0                                                                       | 0.24  | -0.43 | 0.70  | -0.71 |
| Eif4b   | Q8BGD9   | SPPYTAFLGNLPYDVTEDSIK              | S(1): 33.3; Y(4): 33.3; T(5): 33.3; Y(13): 0.0; T(16): 0.0; S(19): 0.0                                              | 1.28  | -0.92 | 0.68  | -0.50 |
| Eif4b   | Q8BGD9   | SQSSDTEQPSPTSGGGK                  | S(1): 0.0; S(3): 92.9; S(4): 6.6; T(6): 0.5; S(10): 0.0; T(12): 0.0; S(13): 0.0                                     | -0.30 | -0.12 | -0.01 | -0.43 |
| Eif4b   | Q8BGD9   | SQSSDTEQPSPTSGGGK                  | S(1): 11.4; S(3): 85.2; S(4): 1.7; T(6): 1.7; S(10): 0.0; T(12): 0.0; S(13): 0.0                                    | -0.10 | -0.71 | -0.06 | -0.11 |
| Epn1    | Q80VP1   | SPGAFDMMSGVGGSLAESVGSPPAATPTPTPPTR | S(1): 0.0; S(8): 0.2; S(13): 4.0; S(17): 4.0; S(20): 91.5; T(26): 0.2; T(28): 0.0; T(30): 0.0; T(33): 0.0           | 0.54  | -0.17 | 0.45  | -0.03 |
| Epn2    | Q8CHU3   | AGGSPASYHGSTSPR                    | S(4): 100.0; S(7): 0.0; Y(8): 0.0; S(11): 0.0; T(12): 0.0; S(13): 0.0                                               | -0.43 | 0.00  | 0.64  | 0.21  |
| Epn2    | Q5NCM5   | AGGSPASYHGSPPEALCPQHR              | S(4): 0.0; S(7): 0.0; Y(8): 0.0; S(11): 50.0; S(15): 50.0                                                           | 1.31  | -1.46 | 0.25  | -0.12 |
| Fam131b | Q3TY60-2 | KVSDVTSSGVQSFDEEEGDANN             | S(3): 100.0; T(6): 0.0; S(7): 0.0; S(8): 0.0; S(12): 0.0                                                            | -1.38 | 0.87  | 0.12  | -0.06 |
| Fam131b | Q3TY60-2 | KVSDVTSSGVQSFDEEEGDANN             | S(3): 0.0; T(6): 0.0; S(7): 0.0; S(8): 0.0; S(12): 100.0                                                            | -0.48 | 0.72  | -1.01 | -0.20 |
| Fam169a | Q5XG69   | SQSEEQSEASSEHLEQFTQSAEK            | S(1): 0.0; S(3): 0.0; S(7): 0.0; S(10): 50.0; S(11): 50.0; T(18): 0.0; S(20): 0.0                                   | 0.03  | 0.08  | -0.41 | -0.52 |
| Fam169a | Q5XG69   | SQSEEQSEASSEHLEQFTQSAEK            | S(1): 0.0; S(3): 1.1; S(7): 9.1; S(10): 9.1; S(11): 80.5; T(18): 0.1; S(20): 0.0                                    | -0.44 | 0.64  | -0.59 | -0.39 |
| Fxr1    | Q61584-4 | RGNPYTSGYGTNSELNPNSETESER          | Y(5): 0.0; T(6): 0.0; S(7): 0.0; Y(9): 0.0; T(11): 0.0; S(13): 0.0; S(16): 0.2; S(19): 98.2; T(21): 1.5; S(23): 0.0 | 0.71  | 0.00  | -0.63 | -0.32 |
| Gja1    | P23242   | MGQAGSTISNSHAQPFDFDDSQNAK          | S(6): 25.0; T(7): 25.0; S(9): 25.0; S(11): 25.0; S(22): 0.0                                                         | -0.39 | 0.16  | -0.24 | -0.34 |
| Gja1    | P23242   | SDPYHATTGPLSPSK                    | S(1): 0.0; Y(4): 0.0; T(7): 0.0; T(8): 0.0; S(12): 99.4; S(14): 0.6                                                 | 0.06  | 0.31  | -0.40 | -0.30 |
| Gm2933  | Q1LZ15   | LMYVLALSSDLLVIQK                   | Y(3): 90.2; S(8): 9.7; S(9): 0.1                                                                                    | -0.37 | 0.43  | -0.42 | 0.22  |
| Gm996   | A2AJA9   | SLEQLDELITDLVIDSR                  | S(1): 100.0; T(10): 0.0; S(16): 0.0                                                                                 | 0.76  | -0.35 | 0.74  | -0.08 |
| Gprin1  | Q3UNH4   | AETVSPGEVDAMTLGK                   | T(3): 4.6; S(5): 95.4; T(13): 0.0                                                                                   | 0.61  | -0.41 | 0.11  | -0.03 |
| Gprin1  | Q3UNH4   | DLAAAAAQKSPSAEAAAAPPPGPR           | S(10): 50.0; S(12): 50.0                                                                                            | 0.10  | -0.40 | -0.15 | -0.12 |
| Gprin1  | Q3UNH4   | VDIVSPGGDNAGSLR                    | S(5): 0.0; S(13): 100.0                                                                                             | 0.33  | -0.42 | -0.18 | -0.26 |
| Gprin1  | Q3UNH4   | AETVSPGEVDAMTLGK                   | T(3): 0.3; S(5): 99.7; T(13): 0.0                                                                                   | 0.24  | -0.03 | -0.37 | 0.41  |
| Gpsm1   | Q6IR34-3 | AAQSSVTASPQTEEFFDLIASSQSR          | S(4): 0.0; S(5): 0.0; T(7): 8.5; S(9): 83.0; T(12): 8.5; S(21): 0.0; S(22): 0.0; S(24): 0.0                         | 0.57  | -0.02 | 0.57  | -0.17 |
| Gramd1b | Q80TI0   | SRSPTPQNQDGMTMVEK                  | S(1): 0.0; S(3): 99.5; T(5): 0.5; T(13): 0.0                                                                        | -0.57 | 0.05  | -0.30 | -0.38 |
| Gramd1b | Q80TI0   | SRSPTPQNQDGMTMVEK                  | S(1): 1.5; S(3): 96.9; T(5): 1.5; T(13): 0.0                                                                        | -0.34 | 0.27  | -0.48 | -0.41 |
| Gtf3c1  | Q8K284-2 | VAASPRPGAEEQAEQAQAQLAAPEDADAGGPR   | S(4): 100.0                                                                                                         | -0.41 | 0.63  | -0.42 | -0.26 |
| Hcn2    | O88703   | DSASPGAASGLDPLDSAR                 | S(2): 7.6; S(4): 92.4; S(9): 0.0; S(16): 0.0                                                                        | 0.54  | -0.47 | -0.34 | 0.26  |
| Hcn2    | O88703   | RAPPGLPPAASPGPPAASPPAASPSPR        | S(12): 0.0; S(19): 0.0; S(25): 50.0; S(26): 50.0                                                                    | 0.18  | -0.66 | -0.42 | 0.25  |
| Htt     | P42859   | ASDPSPATPDSESVIVAMER               | S(2): 0.0; S(5): 0.3; T(8): 97.7; S(11): 1.8; S(13): 0.3                                                            | 1.39  | -0.60 | 0.78  | -1.61 |
| Htt     | P42859   | SGSIVELLAGGGSSCSPVLSR              | S(1): 0.0; S(3): 100.0; S(13): 0.0; S(14): 0.0; S(16): 0.0; S(20): 0.0                                              | 0.15  | -0.23 | 0.13  | -0.45 |
| Htt     | P42859   | SLNPQKSGEEEDSGSAAQLGMCNR           | S(1): 0.2; S(7): 99.7; S(13): 0.1; S(15): 0.1                                                                       | -1.18 | 0.68  | 0.08  | -1.06 |
| Ifi44   | Q8BV66   | DMLLILSALK                         | S(6): 100.0                                                                                                         | 0.44  | -0.27 | 1.08  | -0.49 |
| Ii16    | O54824   | DPGLPESPPPQRPSTK                   | S(7): 100.0; S(15): 0.0; T(16): 0.0                                                                                 | 0.00  | -0.08 | 0.55  | -0.15 |
| Ii16    | O54824   | SASPETPASPGK                       | S(1): 0.9; S(3): 98.2; T(6): 0.9; S(9): 0.0                                                                         | -0.36 | 2.20  | -1.72 | 0.19  |
| Itih2   | Q61703   | SLPEESGEETDTPVPTLYSYK              | S(1): 1.1; S(6): 89.0; T(10): 9.8; T(12): 0.1; T(17): 0.0; Y(19): 0.0; S(20): 0.0; Y(21): 0.0                       | -0.59 | 0.09  | -0.44 | 0.21  |
| Jph3    | Q9ET77   | EFSPSFQHR                          | S(3): 100.0; S(5): 0.0                                                                                              | -0.66 | 0.26  | -0.50 | -0.20 |
| Kif17   | A2AM72   | EYQEEIK                            | Y(2): 100.0                                                                                                         | 0.94  | -0.75 | -0.87 | -0.03 |
| Kif2a   | P28740-1 | ARPSQLPEQSSSAQQNGSVSDISPVQAAK      | S(4): 0.0; S(10): 0.0; S(11): 0.0; S(12): 0.0; S(18): 0.0; S(20): 0.0; S(23): 100.0                                 | -0.25 | 0.07  | 0.63  | 0.01  |

|        |          |                                       |                                                                                                                                     |       |       |       |       |
|--------|----------|---------------------------------------|-------------------------------------------------------------------------------------------------------------------------------------|-------|-------|-------|-------|
| Kif2a  | P28740-1 | EFGISPSDIPFSQGGGSRPDLSPSYDYDFSPSITR   | S(5): 0.3; S(7): 0.3; S(12): 32.9; S(17): 32.9; S(22): 32.9; S(24): 0.3; Y(25): 0.3; Y(27): 0.0; S(31): 0.0; S(33): 0.0; T(35): 0.0 | 0.81  | -0.62 | 0.47  | -0.09 |
| Lgalsl | Q8VED9   | LDDGHLNNSLGSPVQADVYFPR                | S(9): 0.0; S(12): 100.0; Y(19): 0.0                                                                                                 | 0.49  | 0.18  | 0.70  | -0.52 |
| Lgalsl | Q8VED9   | LDDGHLNNSLGSPVQADVYFPR                | S(9): 0.0; S(12): 100.0; Y(19): 0.0                                                                                                 | 0.14  | -0.35 | 0.37  | -0.32 |
| Lnp    | Q7TQ95   | ADSVPNLEPSEESLVTK                     | S(3): 100.0; S(10): 0.0; S(13): 0.0; T(16): 0.0                                                                                     | -0.35 | 0.09  | 0.38  | -0.39 |
| Map1a  | Q9QYR6   | MASPPPSGPPSAAHTPFHQSPVEEK             | S(3): 11.2; S(7): 11.2; S(11): 77.5; T(15): 0.0; S(20): 0.0                                                                         | -0.48 | 0.22  | 0.79  | -0.28 |
| Map1a  | Q9QYR6   | ELSSEPRTPPAQK                         | S(3): 0.0; S(4): 0.0; T(8): 100.0                                                                                                   | 0.07  | 0.42  | 0.50  | 0.03  |
| Map1a  | Q9QYR6   | ELSSAVSPPNLHSDTPTFSYASLAGPTIPPR       | S(3): 0.0; S(4): 0.0; S(7): 98.9; S(13): 0.5; T(15): 0.5; T(17): 0.0; S(19): 0.0; Y(20): 0.0; S(22): 0.0; T(27): 0.0                | 0.09  | -0.22 | 0.50  | -0.47 |
| Map1a  | Q9QYR6   | VAEEEEQSQGSSSYSDWVK                   | S(9): 100.0; S(12): 0.0; S(13): 0.0; S(14): 0.0; Y(15): 0.0; S(16): 0.0                                                             | -0.13 | 0.17  | 0.41  | -0.66 |
| Map1a  | Q9QYR6   | QLSPESLGLQFGELSLGK                    | S(3): 100.0; S(6): 0.0; T(9): 0.0; S(16): 0.0                                                                                       | 0.29  | -0.20 | 0.40  | -0.20 |
| Map1a  | Q9QYR6   | WLAESPVGLPPEEEDKLTR                   | S(5): 100.0; T(18): 0.0                                                                                                             | 0.15  | 0.36  | 0.35  | 0.10  |
| Map1a  | Q9QYR6   | MASPPPSGPPSAAHTPFHQSPVEEK             | S(3): 94.7; S(7): 2.6; S(11): 2.6; T(15): 0.1; S(20): 0.0                                                                           | 0.36  | 0.00  | -0.08 | 0.37  |
| Map1a  | Q9QYR6   | ESTFLDEGPNEQEITPLQHTPR                | S(2): 0.0; T(3): 0.0; T(15): 100.0; T(20): 0.0                                                                                      | 0.33  | -0.68 | -0.24 | -0.06 |
| Map1a  | Q9QYR6   | WLAESPVGLPPEEEDK                      | S(5): 100.0                                                                                                                         | 0.17  | 0.00  | -0.47 | 0.11  |
| Map1a  | P07742   | ATGSYIAGTNGNSGLVPMRLRVYNNNTAR         | T(2): 33.3; S(4): 33.3; Y(5): 33.3; T(9): 0.0; S(13): 0.0; Y(23): 0.0; T(26): 0.0                                                   | 0.00  | -0.11 | -0.58 | 0.41  |
| Map1a  | Q9QYR6   | EMTLQKQKQKQKQK                        | T(3): 0.0; S(8): 100.0                                                                                                              | -0.05 | 0.36  | -0.61 | 0.33  |
| Map1b  | P14873   | TTEAAATAVGTAATTAAVVAAAGIAASGPVK       | T(1): 0.0; T(2): 0.2; T(7): 16.3; T(11): 83.3; T(14): 0.2; T(15): 0.0; S(27): 0.0                                                   | -0.09 | -0.23 | 0.83  | -0.66 |
| Map1b  | P14873   | ETAAAHQASSPPIDAATAEPYGFRR             | T(2): 0.0; S(9): 6.0; S(10): 47.0; S(11): 47.0; T(18): 0.0; Y(22): 0.0                                                              | -0.32 | 0.04  | 0.54  | 0.56  |
| Map1b  | P14873   | QGFPDRESPVSDLTSTGLYQDKQEEK            | S(8): 87.7; S(11): 12.0; T(14): 0.3; S(15): 0.0; T(16): 0.0; Y(19): 0.0                                                             | 0.04  | 0.49  | 0.54  | 0.73  |
| Map1b  | P14873   | DYNASASTISPPSSMEEDK                   | Y(2): 0.0; S(5): 0.0; S(7): 0.0; T(8): 0.2; S(10): 99.7; S(13): 0.0; S(14): 0.0                                                     | 1.39  | -1.48 | 0.41  | 0.31  |
| Map1b  | P14873   | LGGDVSPQTIDVQSGFSFK                   | S(6): 5.6; T(8): 94.4; S(13): 0.0; S(17): 0.0                                                                                       | 0.09  | -0.05 | 0.32  | 0.47  |
| Map1b  | P14873   | DLTSSVEKDSGGK                         | T(3): 0.0; T(4): 0.0; S(5): 0.0; S(6): 0.0; S(11): 100.0                                                                            | -0.17 | 0.41  | 0.13  | -0.26 |
| Map1b  | P14873   | TPEEGGYSEIEK                          | T(1): 100.0; Y(7): 0.0; S(8): 0.0; Y(9): 0.0; S(12): 0.0                                                                            | -0.20 | -0.09 | 0.13  | 0.17  |
| Map1b  | P14873   | SQGSTNSDWMK                           | S(1): 0.0; S(4): 0.0; T(5): 0.1; S(6): 50.0; S(8): 50.0                                                                             | -0.53 | 0.52  | 0.05  | -0.04 |
| Map1b  | P14873   | VLSPLRSPPLGSESPYEDFLSADSK             | S(3): 0.0; S(7): 100.0; S(13): 0.0; S(15): 0.0; Y(17): 0.0; S(22): 0.0; S(25): 0.0                                                  | -0.28 | 0.07  | 0.04  | 0.48  |
| Map1b  | P14873   | SVSPGVTAQAVVEHCASPEEK                 | S(1): 0.0; S(3): 0.0; T(7): 0.0; S(17): 100.0                                                                                       | -0.30 | 0.43  | 0.00  | 0.06  |
| Map1b  | P14873   | QGFPDRESPVSDLTSTGLYQDK                | S(8): 100.0; S(11): 0.0; T(14): 0.0; S(15): 0.0; T(16): 0.0; Y(19): 0.0                                                             | 0.06  | 0.50  | -0.19 | 0.08  |
| Map1b  | P14873   | TTRSPDTSAYCYETMEK                     | T(1): 0.0; T(2): 0.2; S(4): 99.8; T(7): 0.0; S(8): 0.0; Y(10): 0.0; Y(12): 0.0; T(14): 0.0                                          | 1.70  | -1.15 | -0.23 | 0.12  |
| Map1b  | P14873   | ASLSPMDEPVPDESPEVK                    | S(2): 50.0; S(4): 50.0; S(13): 0.0; S(15): 0.0                                                                                      | 0.31  | -0.27 | -0.46 | 0.66  |
| Map1b  | P14873   | SPDTSAYCYETMEK                        | S(1): 95.0; T(4): 0.3; S(5): 4.7; Y(7): 0.0; Y(9): 0.0; T(11): 0.0                                                                  | 0.17  | 0.10  | -0.57 | 0.01  |
| Map2   | P20357   | ETSPETSLIQDEVALK                      | T(2): 99.7; S(3): 0.2; T(6): 0.0; S(7): 0.0                                                                                         | -0.04 | 0.21  | 0.76  | -0.66 |
| Map2   | P20357   | LASVSADAEVAR                          | S(3): 94.4; S(5): 5.6                                                                                                               | -0.33 | -0.02 | 0.41  | -0.22 |
| Map2   | P20357   | VDHGAEITQSPSR                         | T(9): 47.7; S(11): 47.7; S(13): 4.7                                                                                                 | -0.32 | 0.46  | 0.33  | 0.15  |
| Map2   | P20357   | GSAQESLDTISPK                         | S(2): 0.0; S(6): 0.0; T(9): 0.4; S(11): 99.5                                                                                        | -0.27 | 0.55  | 0.24  | 0.04  |
| Map2   | P20357   | ASQPSPPAQEAQYSTLAQSYTPDHPSELPEEPSPQER | S(2): 0.0; S(5): 0.0; Y(13): 0.0; S(14): 0.0; T(15): 0.0; S(19): 0.0; Y(20): 0.0; T(21): 0.0; S(26): 0.0; S(33): 12.1; S(34): 87.9  | 0.58  | 0.09  | 0.18  | -0.34 |
| Map2   | P20357   | ETSPETSLIQDEVALK                      | T(2): 7.3; S(3): 92.7; T(6): 0.0; S(7): 0.0                                                                                         | -0.22 | 0.49  | 0.04  | 0.39  |
| Map2   | P20357   | GVVESVWTIEDDFITVQVTTTDEGESGSHSVR      | S(5): 0.0; T(8): 0.1; T(15): 0.6; T(19): 12.1; T(20): 12.1; T(21): 12.1; S(26): 38.9; S(28): 12.1; S(30): 12.1                      | 0.05  | 0.10  | -0.06 | -0.63 |
| Map2   | P20357   | DGSPDAPATPEKEEVAFSEYK                 | S(3): 100.0; T(9): 0.0; S(18): 0.0; Y(20): 0.0                                                                                      | -0.39 | 0.54  | -0.21 | 0.31  |
| Marcks | P26645   | GEATAERPGEAAVASSPSK                   | T(4): 0.0; S(15): 47.3; S(16): 47.3; S(18): 5.3                                                                                     | -0.13 | 0.04  | 0.04  | -0.27 |
| Marcks | P26645   | VNGDASPAEAEPGAK                       | S(6): 100.0                                                                                                                         | -0.36 | 0.79  | -0.57 | -0.11 |

|        |          |                                    |                                                                                                           |       |       |       |       |
|--------|----------|------------------------------------|-----------------------------------------------------------------------------------------------------------|-------|-------|-------|-------|
| Mier1  | Q5UAK0-4 | APSPPTASNSSNSQSEK                  | S(3): 0.8; T(7): 90.7; S(9): 8.5; S(11): 0.0; S(12): 0.0; S(14): 0.0; S(16): 0.0                          | -0.44 | 0.89  | 1.09  | -1.33 |
| Mobp   | Q9D2P8   | HQPAASPVVVR                        | S(6): 100.0                                                                                               | -0.40 | 0.08  | -0.07 | 0.20  |
| Mobp   | Q9D2P8   | ATSPQRPK                           | T(2): 50.0; S(3): 50.0                                                                                    | 0.56  | -0.13 | -0.44 | 0.54  |
| Mpdz   | Q8VBX6-2 | NVQGLGITIAGYIGDK                   | T(8): 98.6; Y(12): 1.4                                                                                    | 1.31  | -0.50 | -0.40 | -0.13 |
| Mprp   | P97434-2 | DFASEAPTAPLSDACPLSPHR              | S(4): 0.0; T(8): 0.0; S(12): 0.0; S(18): 100.0                                                            | -1.62 | 0.43  | 2.12  | -0.71 |
| Mroh2a | F5H8M8   | CLGSLQGQVSSSAMAEGMEALTK            | S(4): 0.0; S(10): 0.1; S(11): 3.5; S(12): 3.5; T(22): 93.0                                                | -0.45 | 0.42  | -0.48 | -0.36 |
| Myo5a  | D3YZ62   | IGELEVGMENISPGQIIDEPIRPVNIPR       | S(13): 100.0                                                                                              | -0.26 | -0.16 | 0.49  | -1.08 |
| Myo5a  | D3YZ62   | IGELEVGMENISPGQIIDEPIRPVNIPR       | S(13): 100.0                                                                                              | -0.24 | 0.03  | 0.22  | -0.53 |
| Myo5a  | D3YZ62   | RTSSIADEGTYTLDSILR                 | T(2): 48.1; S(3): 48.1; S(4): 3.8; T(10): 0.0; Y(11): 0.0; T(12): 0.0; S(15): 0.0                         | 0.44  | -0.18 | -0.01 | 0.13  |
| N4bp3  | A2A699   | TGLCSPEDNSLTPLLDEVVAPEGR           | T(1): 3.3; S(5): 92.8; S(10): 0.7; T(12): 3.3                                                             | 0.45  | -0.16 | -0.94 | 1.30  |
| Nfix   | Q3TYK3   | SPAAGSSQSSGWPNDVDAGSPR             | S(1): 0.0; S(6): 0.0; S(7): 0.0; S(9): 0.0; S(10): 0.0; S(20): 100.0                                      | 0.87  | -0.38 | 0.08  | 0.63  |
| Nfix   | P70257-1 | SPAAGSSQSSGWPNDVDAGPASK            | S(1): 93.5; S(6): 2.7; S(7): 2.7; S(9): 0.5; S(10): 0.5; S(22): 0.0                                       | 0.06  | -0.09 | -0.47 | 0.10  |
| Npm1   | Q61937   | CGSGPVHISGQHLVAVEEDAESDEDEEDVK     | S(3): 0.0; S(9): 0.0; S(22): 100.0                                                                        | 0.22  | -0.07 | 0.12  | 0.44  |
| Npm1   | Q61937   | CGSGPVHISGQHLVAVEEDAESDEDEEDVK     | S(3): 0.0; S(9): 0.0; S(22): 100.0                                                                        | -0.38 | -0.08 | -0.38 | 0.24  |
| Nucks1 | Q80XU3   | KVVDYSQFQESDDADEDYGR               | Y(5): 0.0; S(6): 0.0; S(11): 100.0; Y(18): 0.0                                                            | -0.91 | 0.20  | 0.01  | -0.03 |
| Nucks1 | Q80XU3   | VVDYSQFQESDDADEDYGR                | Y(4): 0.0; S(5): 0.0; S(10): 100.0; Y(17): 0.0                                                            | -0.12 | 0.07  | -0.50 | 0.30  |
| Oxct1  | Q9D0K2   | SARNFNLPMCK                        | S(1): 100.0                                                                                               | 0.05  | 0.12  | 0.51  | -0.45 |
| Oxct1  | Q9D0K2   | HHTKFYTDPEAVK                      | T(3): 100.0; Y(6): 0.0; T(7): 0.0                                                                         | 0.77  | -1.00 | -0.29 | 1.14  |
| Oxr1   | Q4KMM3   | ESLPIELDQLSGR                      | S(2): 0.0; S(11): 100.0                                                                                   | -0.38 | -0.10 | 0.36  | -0.23 |
| Oxr1   | Q4KMM3   | VVSTSEEEEFTEK                      | S(3): 0.0; S(4): 0.0; T(5): 0.3; S(6): 99.7; T(13): 0.0                                                   | -0.15 | 0.38  | 0.17  | -0.07 |
| Park2  | Q9WVS6   | SHETNASGGDEPQSTSEGSIWESR           | S(1): 10.2; T(4): 89.6; S(7): 0.2; S(14): 0.0; T(15): 0.0; S(16): 0.0; S(19): 0.0; S(23): 0.0             | 0.39  | -0.33 | 0.58  | -0.30 |
| Park2  | Q9WVS6   | SHETNASGGDEPQSTSEGSIWESR           | S(1): 1.6; T(4): 96.8; S(7): 1.6; S(14): 0.0; T(15): 0.0; S(16): 0.0; S(19): 0.0; S(23): 0.0              | -0.38 | 0.10  | 0.39  | -0.30 |
| Pclo   | Q9QYX7   | KDSFSQESSPSSDLAK                   | S(3): 0.0; S(5): 0.0; S(8): 0.0; S(9): 0.0; S(11): 48.1; S(12): 48.1; S(14): 3.8                          | -0.27 | 0.31  | 0.65  | -0.42 |
| Pclo   | Q9QYX7   | KDSFSQESSPSSDLAK                   | S(3): 0.0; S(5): 0.0; S(8): 0.0; S(9): 0.0; S(11): 94.8; S(12): 5.2; S(14): 0.0                           | -0.04 | 0.22  | 0.38  | -0.25 |
| Pclo   | Q9QYX7   | GSVPAAAAESPMHR                     | S(2): 0.0; S(10): 100.0; S(12): 0.0                                                                       | -0.12 | 0.40  | 0.16  | -0.30 |
| Pclo   | Q9QYX7   | SVDTSVQTDDEDQDEWDMPSR              | S(1): 0.0; T(4): 0.6; S(5): 0.6; T(8): 98.8; S(20): 0.0                                                   | 0.55  | -0.50 | -0.04 | -0.05 |
| Pclo   | Q9QYX7   | SMSDPKPLSPTADESSR                  | S(1): 0.0; S(3): 100.0; S(9): 0.0; T(11): 0.0; S(15): 0.0; S(16): 0.0                                     | -0.07 | 0.36  | -0.06 | 0.11  |
| Pclo   | Q9QYX7   | LPTAVSLYSPTEQSVMQK                 | T(3): 0.0; S(6): 0.0; Y(8): 0.4; S(9): 49.8; T(11): 49.8; S(15): 0.0                                      | 0.34  | -0.27 | -0.50 | 0.28  |
| Pclo   | Q9QYX7   | DSFSQESSPSSDLAK                    | S(2): 0.0; S(4): 0.0; S(7): 0.0; S(8): 0.0; S(10): 5.0; S(11): 94.7; S(13): 0.3                           | 0.25  | 0.19  | -0.57 | 0.14  |
| Pclo   | Q9QYX7   | GGSLGCQTETDPTQSPPYMGATSPPKDK       | S(3): 0.0; T(8): 0.0; T(10): 0.0; T(14): 20.0; S(16): 20.0; Y(19): 20.0; T(23): 20.0; S(24): 20.0         | -0.15 | -0.03 | -0.81 | 0.30  |
| Phf3   | B2RQG2   | NTVIDDKPENSPQR                     | T(2): 0.0; S(12): 100.0                                                                                   | -0.42 | 0.49  | -0.40 | 0.05  |
| Phkb   | Q7TSH2   | QSSTADAPEAQHEPGITIEWK              | S(2): 47.7; S(3): 47.7; T(4): 4.7; T(17): 0.0; T(19): 0.0                                                 | -0.55 | 0.17  | 0.08  | -0.11 |
| Phkb   | Q7TSH2   | EGPNFITMEGTVDHIER                  | T(7): 10.0; T(11): 10.0; S(13): 80.1                                                                      | 0.89  | -0.42 | -0.38 | -0.21 |
| Phkb   | Q7TSH2   | SGSVYEPLK                          | S(1): 5.8; S(3): 93.8; Y(5): 0.4                                                                          | 0.51  | -0.84 | -0.46 | -0.04 |
| Pianp  | Q6P1B3   | QEESQQLTDLSPAGVTVLGAFGDSPTPTDHEEPR | S(4): 0.0; T(9): 0.0; S(12): 0.0; T(17): 0.0; S(25): 99.5; T(27): 0.3; T(29): 0.3                         | 0.41  | -0.24 | -0.41 | 0.85  |
| Pkp4   | Q68FH0   | TEPEQGLYSPEQTLHESEGLNSR            | T(1): 0.0; T(7): 0.0; Y(9): 0.0; S(10): 0.4; T(14): 49.8; S(15): 49.8; S(19): 0.0; S(22): 0.0; S(26): 0.0 | 1.38  | -1.42 | 0.82  | -1.08 |
| Pkp4   | Q68FH0   | DGWNQNHFITPVSTLER                  | T(10): 100.0; S(13): 0.0; T(14): 0.0                                                                      | -0.38 | 0.36  | 0.12  | 0.04  |
| Pkp4   | Q68FH0   | VGSPLTLTDAQTR                      | S(3): 100.0; T(6): 0.0; T(8): 0.0; T(12): 0.0                                                             | -0.46 | 0.05  | -0.04 | -0.14 |
| Pkp4   | Q68FH0   | AQSPSYVTSTGVSPSR                   | S(3): 0.0; S(5): 0.0; Y(6): 0.0; T(8): 0.0; S(9): 0.1; T(10): 0.1; S(13): 9.5; S(15): 90.2                | 0.80  | -0.75 | -0.05 | 0.09  |

|           |          |                                  |                                                                                                      |       |       |       |       |
|-----------|----------|----------------------------------|------------------------------------------------------------------------------------------------------|-------|-------|-------|-------|
| Pkp4      | Q68FH0   | VASPSQGQVGSSSPK                  | S(3): 0.0; S(5): 0.0; S(11): 0.0; S(12): 5.3; S(13): 94.7                                            | -0.14 | 0.05  | -0.40 | -0.13 |
| Pkp4      | Q68FH0   | AEQYPGSPDSWV                     | Y(4): 0.0; S(7): 100.0; S(10): 0.0                                                                   | -0.39 | -0.23 | -0.40 | 0.42  |
| Plcl2     | Q8K394   | EFQVSFQVQK                       | S(5): 100.0                                                                                          | -0.35 | 0.26  | -0.81 | -0.06 |
| Plekha6   | P16014   | WASSREDAGAPVEDSQGQTK             | S(3): 50.0; S(4): 50.0; S(15): 0.0; T(19): 0.0                                                       | 0.93  | -0.09 | -0.77 | 1.41  |
| Plekha6   | Q7TQG1   | SIHEVDISNLEAALR                  | S(1): 100.0; S(8): 0.0                                                                               | -0.39 | -0.07 | -0.87 | 0.61  |
| Polr2a    | Q8K019-2 | ADGDWDDQEVLDYFSDKESAK            | Y(13): 50.0; S(15): 50.0; S(19): 0.0                                                                 | 0.00  | 0.00  | -0.55 | 0.55  |
| Polr2a    | P08775   | YSPTSPTSPTSPPK                   | Y(1): 0.5; S(2): 0.5; T(4): 98.6; S(5): 0.5; T(7): 0.0; Y(8): 0.0; S(9): 0.0; T(11): 0.0; S(12): 0.0 | -0.47 | 0.30  | -0.55 | 0.34  |
| Ppfa3     | B8QI35   | RGSALGPDEAGGELER                 | S(3): 100.0                                                                                          | -0.35 | 0.48  | 0.01  | 0.10  |
| Ppfa3     | B8QI35   | GEGPAVPGDTPPTPR                  | T(10): 100.0; T(14): 0.0                                                                             | -0.18 | 0.14  | -0.26 | 0.24  |
| Ppfa3     | B8QI35   | ESVSLAGTPSDETLATDPLGLAK          | S(2): 0.0; S(4): 0.0; T(8): 0.6; S(10): 0.6; T(13): 98.7; T(16): 0.1                                 | 0.23  | -0.08 | -0.38 | 0.06  |
| Prkcb     | P68254   | TAFDEAIAELDTLNEDSYK              | T(1): 0.0; T(12): 0.0; S(17): 99.2; Y(18): 0.8                                                       | -0.22 | 0.47  | 0.27  | -0.17 |
| Prkcb     | P68404-2 | NIDQSEFEGFSFNSEFLKPEVK           | S(5): 0.0; S(11): 50.0; S(15): 50.0                                                                  | -1.33 | 0.17  | 0.49  | -0.53 |
| Prpf40b   | D3Z4N6   | TGWDTSESESEGELER                 | T(1): 0.0; T(5): 0.0; S(6): 0.0; S(8): 0.0; S(11): 100.0                                             | 0.46  | -0.01 | -0.47 | -0.37 |
| Ptchd3    | Q0EEE2   | GFIQIVDVSSSSNK                   | S(9): 25.0; S(10): 25.0; S(11): 25.0; S(12): 25.0                                                    | -1.32 | 0.55  | 0.45  | -0.75 |
| Purb      | O35295   | DSLGDIFIEHYAQLGPPSPEQLAAGAEEGGPR | S(2): 0.0; Y(10): 0.0; S(16): 8.3; S(17): 91.7                                                       | 0.43  | -0.05 | -0.53 | 0.24  |
| Pvrl1     | Q9JKF6   | AGIPQHHPMAQNLQYPDDSDDEK          | Y(16): 0.7; S(20): 99.3                                                                              | 0.60  | -0.69 | -0.53 | 0.16  |
| Rapgef2   | E9QNQ4   | SLGSLSQGSANATVLDVAQTGGHK         | S(1): 97.9; S(4): 2.0; S(6): 0.1; S(9): 0.1; T(13): 0.0; T(20): 0.0                                  | 0.72  | -0.24 | -0.48 | -0.08 |
| Rgl3      | Q3UYI5   | NREPPPPGSPASPQPSPSTK             | S(9): 100.0; S(13): 0.0; S(18): 0.0; S(20): 0.0; T(21): 0.0                                          | -0.94 | 0.18  | 1.44  | -1.37 |
| Rgl3      | Q3UYI5   | EPPPPGSPASPQPSPSTK               | S(7): 100.0; S(11): 0.0; S(16): 0.0; S(18): 0.0; T(19): 0.0                                          | 0.41  | -0.16 | 0.01  | 0.03  |
| Rph3a     | P47708   | WHQLQENHVSSD                     | S(11): 50.0; S(12): 50.0                                                                             | -0.11 | 0.10  | 0.36  | -0.25 |
| Rph3a     | P47708   | TKPQQPAGEPATQEQTPESR             | T(1): 0.0; T(12): 0.0; T(17): 99.4; S(20): 0.6                                                       | 0.31  | -0.65 | 0.32  | -0.48 |
| Rph3a     | P47708   | WHQLQENHVSSD                     | S(11): 0.3; S(12): 99.7                                                                              | 0.39  | -0.14 | 0.31  | -0.41 |
| Rph3a     | P47708   | TKPQQPAGEPATQEQTPESR             | T(1): 0.0; T(12): 0.0; T(17): 99.6; S(20): 0.4                                                       | -0.04 | -0.10 | 0.05  | -0.45 |
| Rps6kc1   | Q8BLK9-2 | GVDLLLEGVQGESPTR                 | S(13): 49.9; S(14): 49.9; T(16): 0.2                                                                 | -0.44 | 0.35  | -0.40 | 0.00  |
| Rtn4      | Q99P72   | DDSPKEYTDLEVSNK                  | S(3): 100.0; Y(7): 0.0; T(8): 0.0; S(13): 0.0                                                        | 0.62  | -0.44 | 0.00  | -0.06 |
| Rtn4      | Q99P72   | LSASPQEVGKPYLESFQPNLHITK         | S(2): 0.0; S(4): 100.0; Y(12): 0.0; S(15): 0.0; T(23): 0.0                                           | -0.36 | -0.03 | -0.09 | -0.10 |
| Rtn4      | Q99P72   | ESAEFSVLEYSEMSSFNSSPK            | S(2): 0.0; S(6): 0.0; Y(10): 0.0; S(11): 0.0; S(15): 0.1; S(16): 0.9; S(20): 99.0                    | -0.01 | -0.48 | -0.43 | 0.01  |
| Rtn4      | Q9QYR6   | ETSPTRGEPVPAWEGK                 | T(2): 0.4; S(3): 99.6; T(5): 0.0                                                                     | 0.02  | 0.30  | 0.04  | 0.38  |
| Ryr2      | E9Q401   | RISQTSQVSIDAAHGYSR               | S(3): 100.0; T(5): 0.0; S(6): 0.0; S(9): 0.0; Y(16): 0.0; S(17): 0.0                                 | 0.88  | -0.88 | 0.40  | -0.29 |
| Ryr2      | E9Q401   | RISQTSQVSIDAAHGYSR               | S(3): 99.6; T(5): 0.4; S(6): 0.0; S(9): 0.0; Y(16): 0.0; S(17): 0.0                                  | 0.63  | -0.64 | 0.25  | -0.02 |
| Ryr2      | E9Q401   | EAAPPEEEGGTPEKESIEDAK            | T(11): 100.0; S(17): 0.0                                                                             | 0.31  | -0.77 | 0.17  | -0.46 |
| Scap      | Q6GQT6   | RDCSGGAFETQENWER                 | S(3): 100.0; T(11): 0.0                                                                              | 0.51  | -0.81 | 1.02  | -0.71 |
| Serpinb6a | F8WIV2   | LTIMDPLQEANGTFALNLLK             | T(2): 50.0; T(13): 50.0                                                                              | -0.55 | 0.21  | -0.21 | 0.19  |
| Serpinb6a | F8WIV2   | LTIMDPLQEANGTFALNLLK             | T(2): 50.0; T(13): 50.0                                                                              | -0.46 | -0.01 | -0.59 | -0.21 |
| Sfr1      | Q8BP27-2 | ENPPSPHSNSSGK                    | S(5): 100.0; S(8): 0.0; S(10): 0.0; S(11): 0.0                                                       | 0.40  | -0.22 | 0.66  | -0.34 |
| Shisa6    | F6VQZ6   | QYNHPILSSATQPTHEKPR              | Y(2): 0.0; S(8): 0.0; S(9): 0.0; T(11): 0.0; T(13): 100.0; T(15): 0.0                                | 0.52  | -0.95 | -0.74 | 0.30  |
| Skiv2l    | Q6NZR5   | LLEPLDLGGDEDEGEAAGGPR            | S(8): 100.0                                                                                          | -0.49 | -0.08 | -0.52 | 0.20  |
| Slc12a5   | Q91V14   | ESSPFINSTDEK                     | S(2): 7.1; S(3): 92.9; S(8): 0.0; T(9): 0.0; T(11): 0.0                                              | -0.15 | -0.10 | -0.37 | 0.18  |
| Slc12a5   | Q91V14   | GPSVPSSEGIK                      | S(3): 100.0; S(6): 0.0; S(7): 0.0                                                                    | -0.07 | -0.06 | -0.38 | -0.19 |
| Slc12a5   | Q91V14   | NKGPSVPSSEGIK                    | S(5): 100.0; S(8): 0.0; S(9): 0.0                                                                    | -0.64 | 0.27  | -0.53 | 0.06  |
| Slc12a5   | Q91V14   | ESSPFINSTDEK                     | S(2): 50.0; S(3): 50.0; S(8): 0.0; T(9): 0.0; T(11): 0.0                                             | -0.06 | 0.01  | -0.53 | 0.18  |
| Slc43a2   | Q8CGA3   | LCLSTVDLEVK                      | S(4): 50.0; T(5): 50.0                                                                               | 1.41  | -0.29 | 0.77  | -0.78 |
| Slc4a4    | E9Q8N8   | MFSNPDNGSPAMTHR                  | S(3): 0.0; S(9): 99.8; T(13): 0.2                                                                    | -0.57 | 0.38  | -0.37 | 0.13  |
| Slc4a4    | E9Q8N8   | MFSNPDNGSPAMTHR                  | S(3): 0.0; S(9): 95.2; T(13): 4.8                                                                    | -0.04 | 0.01  | -0.41 | -0.03 |
| Slc6a11   | P31650   | GSETLGGGGGAAGTR                  | S(2): 100.0; T(4): 0.0; T(15): 0.0                                                                   | -0.58 | 0.82  | -1.12 | -0.36 |
| Sltm      | Q8CH25-2 | DVQDAIAQSPEK                     | S(9): 100.0                                                                                          | 0.59  | -0.20 | 0.64  | -0.45 |



|                                        |          |                                   |                                                                                                                                                                       |       |       |       |       |
|----------------------------------------|----------|-----------------------------------|-----------------------------------------------------------------------------------------------------------------------------------------------------------------------|-------|-------|-------|-------|
| Sp4                                    | K4DI62   | ENNVSQPASSSSSSSSNNGSSSPTK         | S(5): 0.0; S(9): 0.0; S(10): 0.0; S(11): 0.0; S(12): 0.0; S(13): 0.0; S(14): 0.0; S(15): 0.0; S(16): 0.0; S(17): 0.0; S(21): 0.4; S(22): 6.1; S(23): 87.3; T(25): 6.1 | -0.53 | 0.53  | 0.38  | -0.39 |
| Sptbn1                                 | Q62261   | TLETAAQMEGFLNR                    | T(1): 0.0; T(4): 100.0                                                                                                                                                | 0.38  | -0.26 | 0.50  | -0.13 |
| Sptbn1                                 | Q62261   | AQLTPTSVVTITSESSPGKR              | T(3): 0.0; T(6): 0.0; S(7): 0.0; T(10): 0.0; T(12): 0.2; S(13): 33.3; S(15): 33.3; S(16): 33.3                                                                        | -0.51 | 0.39  | -0.02 | -0.12 |
| Sptbn2                                 | Q68FG2   | SSEAAHGATLPTR                     | S(1): 100.0; S(2): 0.0; T(9): 0.0; T(12): 0.0                                                                                                                         | 0.44  | -0.63 | 0.04  | -0.47 |
| Sptbn2                                 | Q68FG2   | LEQSNVPEGPGSGTGDESSGPR            | S(4): 0.0; S(12): 99.6; T(14): 0.4; S(18): 0.0; S(19): 0.0                                                                                                            | -0.35 | -0.10 | -0.03 | -0.48 |
| Sptbn2                                 | Q68FG2   | WDLPDSWDNDSSAR                    | S(6): 100.0; S(12): 0.0; S(13): 0.0; S(14): 0.0                                                                                                                       | -0.08 | 0.23  | -1.07 | -0.37 |
| Sptbn4                                 | E9PX29   | QESADHEGPHSLTLGR                  | S(3): 100.0; S(11): 0.0; T(13): 0.0                                                                                                                                   | 0.73  | -0.82 | 0.36  | -0.18 |
| Srgap1                                 | Q91Z69   | RPGHGSLTNISR                      | S(6): 100.0; T(8): 0.0; S(11): 0.0                                                                                                                                    | -0.52 | -0.16 | 0.47  | -0.56 |
| Srm2                                   | Q8BTI8   | SRTPPSAPSQSR                      | S(1): 0.0; T(3): 100.0; S(6): 0.0; S(9): 0.0; S(11): 0.0                                                                                                              | 0.21  | -0.40 | -0.06 | 0.21  |
| Srm2                                   | Q8BTI8   | SPVPSAFSDQSR                      | S(1): 100.0; S(5): 0.0; S(8): 0.0; S(11): 0.0                                                                                                                         | -0.42 | 0.23  | -0.19 | 0.12  |
| Srm2                                   | Q8BTI8   | MVQASSQSLPPAQRPRSPVPSAFSDQSR      | S(5): 0.0; S(6): 0.0; S(8): 0.0; S(19): 100.0; S(23): 0.0; S(26): 0.0; S(29): 0.0                                                                                     | 0.06  | -0.40 | -0.21 | 0.03  |
| Srm2                                   | Q8BTI8   | SGTPPRPGSVTNMQADECTATPQR          | S(1): 0.6; T(3): 99.4; S(9): 0.0; T(11): 0.0; T(19): 0.0; T(21): 0.0                                                                                                  | 0.40  | -0.02 | -0.25 | 0.29  |
| Srm2                                   | Q8BTI8   | SGMSPEQSK                         | S(1): 0.0; S(4): 100.0; S(8): 0.0                                                                                                                                     | -0.06 | -0.02 | -0.38 | 0.29  |
| Stxbp1                                 | O08599-2 | ESSRVSFEDQAPTME                   | S(2): 0.0; S(3): 0.0; S(6): 99.9; T(13): 0.0                                                                                                                          | -0.64 | 0.67  | 0.73  | -0.53 |
| Svop                                   | Q8BFT9   | TGESARSEDDAASGEHQIEGVR            | T(1): 1.6; S(4): 49.2; S(7): 49.2; S(13): 0.1                                                                                                                         | -0.56 | 0.44  | -0.46 | -0.27 |
| Svop                                   | Q8BFT9   | TGESARSEDDAASGEHQIEGVR            | T(1): 0.0; S(4): 50.0; S(7): 50.0; S(13): 0.0                                                                                                                         | -0.67 | 0.49  | -0.64 | -0.26 |
| Syn1                                   | O88935   | QTSQQPAGPPAQRPPPGGPPQPGPGPQR      | T(2): 15.6; S(3): 84.4                                                                                                                                                | 0.62  | -1.67 | 0.80  | -0.73 |
| Syn1                                   | O88935   | QSRPVAGGPGAPPAARPPASPSQSR         | S(2): 0.0; S(20): 1.2; S(22): 98.8                                                                                                                                    | 0.33  | -0.08 | 0.49  | -0.31 |
| Syn1                                   | O88935   | SQSLTNAFNLPEPAPRPSLSQDEVK         | S(1): 0.0; S(3): 0.0; T(5): 0.0; S(19): 50.0; S(21): 50.0                                                                                                             | 0.51  | -0.14 | 0.48  | -0.27 |
| Syn1                                   | O88935   | QASISGPAPTK                       | S(3): 100.0; S(5): 0.0; T(10): 0.0                                                                                                                                    | 0.18  | -0.50 | 0.34  | -0.47 |
| Syn1                                   | O88935   | QSRPVAGGPGAPPAARPPASPSQSR         | S(2): 0.0; S(20): 1.1; S(22): 98.9                                                                                                                                    | 0.30  | -0.42 | 0.17  | 0.37  |
| Tanc1                                  | E9QAF9   | RADNCSPVAEEETTGAESVLPK            | S(6): 100.0; T(13): 0.0; T(14): 0.0; S(16): 0.0; S(19): 0.0                                                                                                           | 0.09  | 0.11  | 0.46  | -0.28 |
| Tanc1                                  | E9QAF9   | ADNCSPVAEEETTGAESVLPK             | S(5): 100.0; T(12): 0.0; T(13): 0.0; S(15): 0.0; S(18): 0.0                                                                                                           | 0.70  | 0.19  | 0.28  | -0.01 |
| Tanc1                                  | E9QAF9   | QQGPPPAPANDSDNEEDAPASSLK          | S(12): 100.0; S(21): 0.0; S(22): 0.0                                                                                                                                  | 0.39  | -0.31 | 0.03  | -0.15 |
| Tanc1                                  | E9QAF9   | QQGPPPAPANDSDNEEDAPASSLK          | S(12): 100.0; S(21): 0.0; S(22): 0.0                                                                                                                                  | -0.15 | 0.55  | -0.62 | -0.13 |
| Tom1l2                                 | Q5SRX1   | AAETVPDLPSPTTEAPAPASNTSTR         | T(4): 0.0; S(10): 38.8; T(13): 38.8; S(20): 1.4; T(22): 7.0; S(23): 7.0; T(24): 7.0                                                                                   | 0.23  | 0.79  | 0.95  | -0.11 |
| Tom1l2                                 | Q5SRX1   | GIEFPMADLDALSPIHTPQR              | S(13): 100.0; T(17): 0.0                                                                                                                                              | 1.06  | 0.01  | 0.67  | 0.80  |
| Tom1l2                                 | Q5SRX1   | AAETVPDLPSPTTEAPAPASNTSTR         | T(4): 0.0; S(10): 50.0; T(13): 50.0; S(20): 0.0; T(22): 0.0; S(23): 0.0; T(24): 0.0                                                                                   | 0.52  | -0.86 | 0.17  | 0.24  |
| Tom1l2                                 | Q5SRX1   | GIEFPMADLDALSPIHTPQR              | S(13): 100.0; T(17): 0.0                                                                                                                                              | 0.74  | -0.43 | 0.10  | -0.63 |
| Top2b                                  | Q64511   | KASGSENEGDPYNGR                   | S(3): 50.0; S(5): 50.0; Y(11): 0.0                                                                                                                                    | -0.12 | 0.09  | 0.59  | 0.19  |
| Top2b                                  | Q64511   | KTSFDQSDVDIFPSDFTSEPPALPR         | T(2): 0.0; S(3): 0.0; S(8): 100.0; S(15): 0.0; T(18): 0.0; S(19): 0.0                                                                                                 | -0.59 | 0.03  | -0.13 | -0.17 |
| Top2b                                  | Q3UID0   | DMDEPSPVNVVEVTLPK                 | S(6): 100.0; T(15): 0.0                                                                                                                                               | 0.33  | 0.08  | -0.69 | 0.41  |
| Top2b                                  | Q64511   | FDSNEEDTASVFAPSGFLK               | S(3): 100.0; T(8): 0.0; S(10): 0.0; S(15): 0.0                                                                                                                        | -0.42 | 0.44  | -0.69 | 0.60  |
| Transmembrane protein C15orf27 homolog | Q8BZB3   | ALDPAPLAQPTPLGVSQTSPELEHR         | T(11): 0.0; S(15): 0.0; T(18): 50.0; S(19): 50.0                                                                                                                      | -0.54 | 0.00  | -0.42 | -0.19 |
| Trim28                                 | E9Q6J5   | GSDDVLVSGEVPECEVGHMSPR            | S(2): 0.0; S(8): 0.0; S(20): 100.0                                                                                                                                    | -0.38 | -0.07 | -0.50 | 0.66  |
| Trim28                                 | Q62318   | RPAASSAAAAAASSPAGGGGAEQELLEHCGVCR | S(5): 0.0; S(6): 0.0; S(11): 0.0; S(15): 50.0; S(16): 50.0                                                                                                            | -0.37 | 0.77  | -0.50 | 0.73  |
| Ube4b                                  | Q9ES00   | LAGGQTSQPTTTLSPQR                 | T(6): 0.0; S(7): 0.0; T(10): 0.0; T(11): 0.0; T(14): 50.0; S(15): 50.0                                                                                                | 0.68  | -0.09 | 0.75  | -0.03 |
| Uty                                    | D6RFT4   | GSEVQSIIK                         | S(2): 0.0; S(6): 100.0                                                                                                                                                | 0.64  | -0.71 | -0.42 | 0.06  |
| Vdac1                                  | Q8K284-2 | VAASPRPGAEEQAQAPLAAPEDADAGGPR     | S(4): 100.0                                                                                                                                                           | -0.57 | 0.06  | -0.43 | 0.03  |
| Vdac1                                  | Q60932-2 | LTFDSSFSPNTGK                     | T(2): 0.0; S(5): 0.5; S(6): 0.5; S(8): 98.5; T(11): 0.5                                                                                                               | 0.25  | 0.01  | -0.44 | 1.55  |
| Vill                                   | D3Z669   | TVVSVFPGNNK                       | T(1): 93.3; S(4): 6.7                                                                                                                                                 | -0.68 | 0.05  | -0.40 | -0.13 |



|        |          |                               |                                                                                     |       |      |       |       |
|--------|----------|-------------------------------|-------------------------------------------------------------------------------------|-------|------|-------|-------|
| Ywhaz  | P63101   | TAFDEAIAELDTLSEESYK           | T(1): 0.0; T(12): 0.1; S(14): 99.7; S(17): 0.1; Y(18): 0.1                          | -0,51 | 0,55 | 0,02  | -0,40 |
| Ywhaz  | P63101   | TAFDEAIAELDTLSEESYKDSTLIMQLLR | T(1): 0.0; T(12): 49.9; S(14): 49.9; S(17): 0.1; Y(18): 0.1; S(21): 0.0; T(22): 0.0 | 0,09  | 0,30 | -0,37 | 0,85  |
| Zswim8 | Q3UHH1-3 | KQSAGPNSPTGGGGGGSGGTR         | S(3): 0.0; S(8): 99.8; T(10): 0.2; S(18): 0.0; T(21): 0.0                           | -0,56 | 0,92 | 0,82  | 0,02  |

**Supplementary Table S10: Phosphoproteins common to both models Tg(*Dyrk1a*) and Ts65Dn in each region of hippocampus, cortex and cerebellum.**

| Hippocampus | Cortex        | Cerebellum |
|-------------|---------------|------------|
| Aak1        | Aak1          | Aak1       |
| Ace         | Adcy5         | Acot11     |
| Akap5       | Agap2         | Akap12     |
| Aldoa       | Akt2          | Akt1       |
| Arhgef2     | Aldoc         | Akt2       |
| Arhgef28    | Amot          | Amph       |
| Basp1       | Ap2a1         | Ap3d1      |
| Bcmo1       | Ap4e1         | Appl1      |
| Bsn         | Apc           | Arfgap1    |
| C2cd2l      | Arhgap21      | Arhgap21   |
| Cacna1a     | Arhgap35      | Arhgef12   |
| Camkv       | Asap1         | Arvcf      |
| Caskin1     | Atp1a1        | Atp1a3     |
| Cep170b     | Atp1a3        | Brsk1      |
| Chgb        | Atp4a         | Bsn        |
| Clip2       | Atp8a1        | Cacna1g    |
| Clns1a      | Atxn2l        | Camsap2    |
| Col3a1      | Avl9          | Caskin1    |
| Col4a1      | Begain        | Caskin2    |
| Dmtn        | Bod1l         | Ckb        |
| Dnah7b      | Braf          | Clns1a     |
| Eif2ak4     | Cacna1b       | Coro1a     |
| Fam169a     | Camk2d        | Cstf2t     |
| Fam171a2    | Cep170b       | Ctage5     |
| Foxk1       | Chga          | Dagla      |
| Gbf1        | Col3a1        | Dbi        |
| Gm14597     | Comt          | Dclk1      |
| Gpr123      | Ctnnd2        | Dmtn       |
| Grin2b      | Ctps1         | Dmxl2      |
| Hcn2        | D430041D05Rik | Dnajc6     |
| Hepacam     | Dchs1         | Dock4      |
| Hn1         | Ehd3          | Dsg2       |
| Hnrpa0      | Eml2          | Efhd2      |
| Huwe1       | Fam208a       | Eif4b      |
| Krt26       | Gkn1          | Epn1       |
| Lmna        | Gm10277       | Epn2       |
| Map1a       | Gm15800       | Fam134a    |
| Map1b       | Gm4951        | Fam169a    |
| Map2        | Gm996         | Fam171a2   |
| Marcks      | Gprin1        | Fxr1       |

|         |                                          |          |
|---------|------------------------------------------|----------|
| Marcks1 | Hepacam                                  | Gja1     |
| Mccc2   | Kcnb1                                    | Gm2933   |
| Me1     | Klc2                                     | Gm996    |
| Mtdh    | Lmtk3                                    | Gprin1   |
| Mug2    | Lppr2                                    | Gpsm1    |
| Mycbpap | Lppr4                                    | Gramd1b  |
| Myo18a  | Mag                                      | Gtf3c1   |
| Nap114  | Map1a                                    | Hcn2     |
| Ncl     | Map1b                                    | Hist1h4a |
| Nefh    | Map2                                     | Htt      |
| Nefm    | Map3k7                                   | Ifi44    |
| Nktr    | Mfsd9                                    | Ii16     |
| Npnt    | Napa                                     | Itih2    |
| Nsmf    | Nf1                                      | Jph3     |
| Nudt3   | Npm1                                     | Kcnc1    |
| Pacsin1 | Nup210                                   | Kif17    |
| Pak3    | Osbp                                     | Kif2a    |
| Palmd   | Pcdh1                                    | Lgalsl   |
| Pcdh11x | Pclo                                     | Lnp      |
| Pclo    | Ppp1r1b                                  | Lzts3    |
| Pp2d1   | Ppp1r3g                                  | Map1a    |
| Ppm1g   | Pycard                                   | Map1b    |
| Ppp1r18 | Rsph3b                                   | Map2     |
| Ppp6r3  | Rtn1                                     | Marcks   |
| Prkcb   | Rtn4                                     | Mier1    |
| Prrc2c  | Scfd1                                    | Mobp     |
| Prrt2   | Sec22b                                   | Mpdz     |
| Rab3a   | Sin3a                                    | Mprip    |
| Rbbp8   | Sipa111                                  | Mroh2a   |
| Reps2   | Sirt2                                    | Myo5a    |
| Rgs14   | Slc7a8                                   | N4bp3    |
| Rltpr   | Snx17                                    | Npm1     |
| Rnf20   | Snx5                                     | Nucks1   |
| Scg2    | Syn1                                     | Oxct1    |
| Sdc4    | Syngap1                                  | Oxr1     |
| Shank1  | Synj1                                    | Park2    |
| Sipa113 | Tbc1d5                                   | Pclo     |
| Sirt2   | Tekt4                                    | Phf3     |
| Slc12a5 | Tmem163                                  | Phkb     |
| Slc1a3  | Tmsb4x                                   | Pianp    |
| Slc1a4  | Trappc8                                  | Pkp4     |
| Slc7a14 | Ube4b                                    | Plcl2    |
| Slc9a6  | Uncharacterized protein C15orf39 homolog | Plekha6  |
| Sparcl1 | Usp10                                    | Ppfia3   |

|          |       |                                          |
|----------|-------|------------------------------------------|
| Specc1   | Usp45 | Prkcb                                    |
| Sptbn1   | Yap1  | Prpf40b                                  |
| Srrm2    | Ywhaz | Ptchd3                                   |
| Stim1    |       | Purb                                     |
| Syk      |       | Pvrl1                                    |
| Syn1     |       | Rabl6                                    |
| Synpr    |       | Rapgef2                                  |
| Tcp11l1  |       | Rgl3                                     |
| Tmem161a |       | Rps6kc1                                  |
| Tom1     |       | Rtn4                                     |
| Tppp     |       | Ryr2                                     |
| Tsc22d2  |       | Scaf8                                    |
| Tsg101   |       | Scap                                     |
| Ube2w    |       | Serpinb6a                                |
| Unc13a   |       | Sfr1                                     |
| Utp20    |       | Shisa6                                   |
| Wfs1     |       | Skiv2l                                   |
| Wwp1     |       | Slc12a5                                  |
| Zdhc5    |       | Slc43a2                                  |
| Zswim8   |       | Slc4a4                                   |
|          |       | Slc6a11                                  |
|          |       | Slc9a1                                   |
|          |       | Sltm                                     |
|          |       | Sp4                                      |
|          |       | Sptbn1                                   |
|          |       | Sptbn2                                   |
|          |       | Sptbn4                                   |
|          |       | Srgap1                                   |
|          |       | Srrm1                                    |
|          |       | Srrm2                                    |
|          |       | Stxbp1                                   |
|          |       | Svop                                     |
|          |       | Syn1                                     |
|          |       | Tanc1                                    |
|          |       | Tom1l2                                   |
|          |       | Top2b                                    |
|          |       | Transmembrane protein C15orf27 homolog   |
|          |       | Trim28                                   |
|          |       | Ube4b                                    |
|          |       | Uncharacterized protein C18orf25 homolog |
|          |       | Uty                                      |
|          |       | Vdac1                                    |
|          |       | Vill                                     |
|          |       | Ywhaz                                    |
|          |       | Zfp292                                   |
|          |       | Zswim8                                   |

**Supplementary Table S11: Biological processes altered by the common proteins up- and down-phosphorylated in the hippocampus of Tg(*Dyrk1a*) and Ts65Dn mice, and reverted by L41 treatment.**  
**ToppCluster analysis.**

| ID         | GO : Biological Process         | TgDyrk1a logP | Ts65Dn logP | TgDyrk1a                                                                                                                               | Ts65Dn                                                                                                                                                                                                     |
|------------|---------------------------------|---------------|-------------|----------------------------------------------------------------------------------------------------------------------------------------|------------------------------------------------------------------------------------------------------------------------------------------------------------------------------------------------------------|
|            |                                 | pValues       |             | Gene List                                                                                                                              |                                                                                                                                                                                                            |
| GO:0007268 | synaptic transmission           | 10.0000       | 10.0000     | AKAP5 BSN CACNA1A EIF2AK4 GRIN2B HCN2 MYCBPAP NSMF PCLO PRKCB RAB3A RGS14 SHANK1 SLC12A5 SLC1A3 SLC1A4 SYN1 UNC13A                     | AP2A1 APBA1 APOE ATP1A2 BSN CACNB2 CASK EIF2AK4 GRIN2B GRIP1 HCN2 JPH3 KCNA2 KCNAB2 MYCBPAP NEFL NSMF PCLO PRKCB PRKCE RAB3A RGS14 SIPA1L1 SLC1A4 SLC6A11 STX1A                                            |
| GO:0007010 | cytoskeleton organization       | 10.0000       | 10.0000     | ALDOA ARHGEF2 ARHGEF28 DMTN DNAH7 LMNA MAP1A MAP1B MAP2 MYO18A NEFH NEFM PACSIN1 PAK3 PCLO RGS14 SDC4 SHANK1 SIRT2 SPTBN1 TPPP         | ABI2 ADD1 ALDOA APOE ARFIP2 ARHGEF2 ARHGEF28 CROCC DMTN DNAI2 ENAH FRYL IQSEC2 KLHL41 LMNA MAP1A MAP1B NEFL PACSIN1 PCLO PRKCE RGS14 SDC4 SIPA1L1 SIRT2 SON SORBS1 SPTBN1 WDR62 WIPF2                      |
| GO:0007267 | cell-cell signaling             | 5.4650        | 10.0000     | AKAP5 BSN C2CD2L CACNA1A EIF2AK4 GRIN2B HCN2 MARCKS MYCBPAP NSMF NUDT3 PCLO PRKCB RAB3A RGS14 SHANK1 SLC12A5 SLC1A3 SLC1A4 SYN1 UNC13A | AP2A1 APBA1 APOE ATP1A2 BSN C2CD2L CACNB2 CASK EIF2AK4 GAL GRIN2B GRIP1 HCN2 JPH3 KCNA2 KCNAB2 MYCBPAP NEFL NSMF NUDT3 PCLO PRKAR2A PRKAR2B PRKCB PRKCE RAB3A RGS14 SIPA1L1 SLC1A4 SLC6A11 STX1A VPS35     |
| GO:0048812 | neuron projection morphogenesis | 5.8279        | 4.9981      | AKAP5 ARHGEF28 CACNA1A COL3A1 COL4A1 EIF2AK4 GRIN2B MAP1B MAP2 NEFH NSMF PACSIN1 PAK3 RAB3A SHANK1 SLC9A6 SPTBN1 UNC13A                | AP2A1 APOE ARHGAP35 ARHGEF12 ARHGEF28 CACNB2 COL3A1 COL4A1 EIF2AK4 ENAH GRIN2B MAP1B NEFL NSMF PACSIN1 PGRMC1 PVRL1 RAB3A RASAL1 SIPA1L1 SLC9A6 SPTBN1 USP9X VAV3                                          |
| GO:0032940 | secretion by cell               | 10.0000       |             | AKAP5 ALDOA C2CD2L CACNA1A DMTN GRIN2B MARCKS MYO18A NCL PCLO PRKCB RAB3A RLTPR SCG2 SDC4 SLC1A3 SPTBN1 SYK SYN1 TSG101 UNC13A         |                                                                                                                                                                                                            |
| GO:0031175 | neuron projection development   |               | 10.0000     |                                                                                                                                        | ABI2 AP2A1 APOE ARHGAP35 ARHGEF12 ARHGEF28 ATCAY CACNB2 COL3A1 COL4A1 EIF2AK4 ENAH FRYL GPRIN1 GRIN2B GRIP1 ITM2C MAP1B NEFL NSMF PACSIN1 PGRMC1 PVRL1 RAB3A RASAL1 SEPT2 SIPA1L1 SLC9A6 SPTBN1 USP9X VAV3 |
| GO:1903530 | regulation of secretion by cell | 10.0000       |             | AKAP5 C2CD2L CACNA1A GRIN2B MARCKS MYO18A NCL PCLO PRKCB RAB3A RLTPR SDC4 SPTBN1 SYK SYN1 TSG101 UNC13A                                |                                                                                                                                                                                                            |



|            |                                     |         |         |                                                                                                                                               |                                                                                                                                                                                                                 |
|------------|-------------------------------------|---------|---------|-----------------------------------------------------------------------------------------------------------------------------------------------|-----------------------------------------------------------------------------------------------------------------------------------------------------------------------------------------------------------------|
| GO:0051046 | regulation of secretion             | 10.0000 |         | AKAP5 C2CD2L CACNA1A GRIN2B MARCKS MYO18A NCL PCLO PRKCB RAB3A RLTPR SDC4 SPTBN1 SYK SYN1 TSG101 UNC13A                                       |                                                                                                                                                                                                                 |
| GO:0046903 | secretion                           | 10.0000 |         | ACE AKAP5 ALDOA C2CD2L CACNA1A DMTN GRIN2B MARCKS MYO18A NCL PCLO PRKCB RAB3A RLTPR SCG2 SDC4 SLC1A3 SPTBN1 SYK SYN1 TSG101 UNC13A            |                                                                                                                                                                                                                 |
| GO:0060341 | regulation of cellular localization | 10.0000 |         | AKAP5 C2CD2L CACNA1A DMTN GBF1 GRIN2B HUWE1 LMNA MAP1B MARCKS MYO18A NCL NEFH PCLO PRKCB RAB3A RLTPR SDC4 SIRT2 SPTBN1 SYK SYN1 TSG101 UNC13A |                                                                                                                                                                                                                 |
| GO:0006865 | amino acid transport                |         | 10.0000 |                                                                                                                                               | APBA1 ATP1A2 GRIN2B RAB3A SEPT2 SLC17A6 SLC1A4 SLC6A11 SLC7A14 SLC7A8 STX1A                                                                                                                                     |
| GO:0048666 | neuron development                  |         | 5.6658  |                                                                                                                                               | ABI2 AP2A1 APOE ARHGAP35 ARHGEF12 ARHGEF28 ATCAY CACNB2 COL3A1 COL4A1 EIF2AK4 ENAH FRYL GPRIN1 GRIN2B GRIP1 ITM2C MAP1B NEFL NSMF PACSIN1 PGRMC1 PVRL1 RAB3A RASAL1 SDC4 SEPT2 SIPA1L1 SLC9A6 SPTBN1 USP9X VAV3 |
| GO:0016358 | dendrite development                | 5.5182  |         | AKAP5 CACNA1A MAP1B MAP2 NSMF PACSIN1 PAK3 SHANK1 SLC9A6                                                                                      |                                                                                                                                                                                                                 |
| GO:0046942 | carboxylic acid transport           |         | 5.5116  |                                                                                                                                               | ACE APBA1 APOE ATP1A2 GRIN2B RAB3A SEPT2 SLC17A6 SLC1A4 SLC6A11 SLC7A14 SLC7A8 STX1A SYK                                                                                                                        |
| GO:0017157 | regulation of exocytosis            | 5.4720  |         | CACNA1A PCLO RAB3A SDC4 SYK SYN1 TSG101 UNC13A                                                                                                |                                                                                                                                                                                                                 |
| GO:0015849 | organic acid transport              |         | 5.4651  |                                                                                                                                               | ACE APBA1 APOE ATP1A2 GRIN2B RAB3A SEPT2 SLC17A6 SLC1A4 SLC6A11 SLC7A14 SLC7A8 STX1A SYK                                                                                                                        |
| GO:0007015 | actin filament organization         |         | 5.2844  |                                                                                                                                               | ABI2 ADD1 ALDOA ARFIP2 ARHGEF2 DMTN ENAH FRYL PACSIN1 PRKCE SDC4 SORBS1 SPTBN1 WIPF2                                                                                                                            |
| GO:0050808 | synapse organization                | 5.2328  |         | BSN CACNA1A COL4A1 PAK3 PCLO RAB3A SHANK1 SLC9A6 UNC13A                                                                                       |                                                                                                                                                                                                                 |

|            |                                                       |        |        |                                                                                                                               |                                                                                                                                                      |
|------------|-------------------------------------------------------|--------|--------|-------------------------------------------------------------------------------------------------------------------------------|------------------------------------------------------------------------------------------------------------------------------------------------------|
| GO:0006835 | dicarboxylic acid transport                           |        | 5.2268 |                                                                                                                               | APBA1 ATP1A2 GRIN2B RAB3A SEPT2 SLC17A6 SLC1A4 STX1A                                                                                                 |
| GO:0015711 | organic anion transport                               |        | 5.1795 |                                                                                                                               | ACE APBA1 APOE ATP1A2 ATP8A1 GRIN2B RAB3A SEPT2 SLC17A6 SLC1A4 SLC4A4 SLC6A11 SLC7A14 SLC7A8 STX1A SYK                                               |
| GO:1903532 | positive regulation of secretion by cell              | 5.1216 |        | C2CD2L GRIN2B MYO18A NCL RAB3A RLTPR SDC4 SPTBN1 SYK TSG101 UNC13A                                                            |                                                                                                                                                      |
| GO:0050804 | modulation of synaptic transmission                   | 5.0345 |        | CACNA1A EIF2AK4 GRIN2B NSMF RAB3A RGS14 SHANK1 SLC1A3 SYN1 UNC13A                                                             |                                                                                                                                                      |
| GO:0050767 | regulation of neurogenesis                            | 5.0074 |        | ACE AKAP5 ARHGEF2 CACNA1A COL3A1 EIF2AK4 MAP1B MAP2 NSMF PACSIN1 PAK3 RGS14 SHANK1 SIRT2 UNC13A                               |                                                                                                                                                      |
| GO:0071705 | nitrogen compound transport                           |        | 4.9578 |                                                                                                                               | APBA1 ATP1A2 C2CD2L GAL GRIN2B HNRNPA1 KCNA2 MYO1C PCLO PRKAR2A PRKAR2B PRKCB PRKCE RAB3A SEPT2 SLC17A6 SLC1A4 SLC6A11 SLC7A14 SLC7A8 SMG6 STX1A SYK |
| GO:0048858 | cell projection morphogenesis                         | 4.9237 |        | AKAP5 ARHGEF28 CACNA1A COL3A1 COL4A1 DNAH7 EIF2AK4 GRIN2B MAP1B MAP2 NEFH NSMF PACSIN1 PAK3 RAB3A SHANK1 SLC9A6 SPTBN1 UNC13A |                                                                                                                                                      |
| GO:0050806 | positive regulation of synaptic transmission          | 4.8784 |        | EIF2AK4 GRIN2B RAB3A RGS14 SHANK1 SLC1A3 UNC13A                                                                               |                                                                                                                                                      |
| GO:0032990 | cell part morphogenesis                               | 4.8217 |        | AKAP5 ARHGEF28 CACNA1A COL3A1 COL4A1 DNAH7 EIF2AK4 GRIN2B MAP1B MAP2 NEFH NSMF PACSIN1 PAK3 RAB3A SHANK1 SLC9A6 SPTBN1 UNC13A |                                                                                                                                                      |
| GO:0051047 | positive regulation of secretion                      | 4.7964 |        | C2CD2L GRIN2B MYO18A NCL RAB3A RLTPR SDC4 SPTBN1 SYK TSG101 UNC13A                                                            |                                                                                                                                                      |
| GO:0048667 | cell morphogenesis involved in neuron differentiation | 4.7810 |        | AKAP5 ARHGEF28 CACNA1A COL3A1 COL4A1 GRIN2B MAP1B MAP2 NEFH NSMF PAK3 RAB3A SHANK1 SLC1A3 SLC9A6 SPTBN1                       |                                                                                                                                                      |
| GO:0060052 | neurofilament cytoskeleton organization               |        |        | ARHGEF28 NEFH NEFM                                                                                                            |                                                                                                                                                      |
|            |                                                       | 4.7808 |        |                                                                                                                               |                                                                                                                                                      |

Supplementary Table S12: Biological processes altered by the common proteins up- and down-phosphorylated in the cortex of Tg(*Dyrk1a*) and Ts65Dn mice, and reverted by L41 treatment. ToppCluster analysis.

| ID         | GO: Biological Process                    | TgDyrk1a logP | Ts65Dn logP | TgDyrk1a                                                                                                                                                                                                                                                         | Ts65Dn                                                                                                                                                                       |
|------------|-------------------------------------------|---------------|-------------|------------------------------------------------------------------------------------------------------------------------------------------------------------------------------------------------------------------------------------------------------------------|------------------------------------------------------------------------------------------------------------------------------------------------------------------------------|
|            |                                           | PValues       |             | Gene List                                                                                                                                                                                                                                                        |                                                                                                                                                                              |
| GO:0032990 | cell part morphogenesis                   | 10.0000       | 10.0000     | ABLIM3 AGAP2 AHI1 AP2A1 APC ARHGAP39 ASAP1 BRSK1 CAMK2D COL3A1 COL4A3BP CRMP1 CTNND2 DBN1 DBNL DPYSL5 GAP43 GDI1 IL17RD MAG MAP1B MAP1S MAP2 MAP2K1 MARK2 MYCBP2 MYO9B NEDD4L NF1 PSMD1 PSMD2 RAB3A RTN4 SIPA1L1 SLC9A6 SPTBN1 SRCIN1 SYNGAP1 TBC1D15 TNIK TOP2B | ABLIM3 AGAP2 AP2A1 APC ARHGAP39 ASAP1 BCL11B CAMK2D EHD3 GRIN2A GRIN2B HTT LRFN1 MAP1B MAP2 MARK3 NF1 NUMBL PTPN23 RIMS1 RTN4 SIPA1L1 SRC SYNGAP1 TBC1D15 TBC1D5 TIAM1       |
| GO:0007268 | synaptic transmission                     | 10.0000       | 10.0000     | ADCY5 ADCY9 AP2A1 APBA1 BRSK1 CACNA1B CACNA1E CAMK2D CSPG5 CTNNB1 CTNND2 DBN1 DNAJC5 HRH3 KCNB1 NF1 PCLO PDPK1 PPFIA4 RAB3A SIPA1L1 SLC6A11 SLC8A2 SYN1 SYN2 SYN3 SYNGAP1 SYNJ1                                                                                  | AMPH AP2A1 BCAN BSN CAMK2D COMT CPLX1 GNG3 GRIN2A GRIN2B HCN1 HTT KCNA2 KCNB1 NAPA NF1 PCLO PDPK1 PRKCB RIMS1 SIPA1L1 SYN1 SYNGAP1 SYNJ1                                     |
| GO:0048858 | cell projection morphogenesis             | 10.0000       | 10.0000     | ABLIM3 AGAP2 AHI1 AP2A1 APC ARHGAP39 ASAP1 BRSK1 CAMK2D COL3A1 CRMP1 CTNND2 DBN1 DBNL DPYSL5 GAP43 GDI1 IL17RD MAG MAP1B MAP1S MAP2 MAP2K1 MARK2 MYCBP2 MYO9B NEDD4L NF1 PSMD1 PSMD2 RAB3A RTN4 SIPA1L1 SLC9A6 SPTBN1 SRCIN1 SYNGAP1 TBC1D15 TNIK TOP2B          | ABLIM3 AGAP2 AP2A1 APC ARHGAP39 ASAP1 BCL11B CAMK2D EHD3 GRIN2A GRIN2B HTT LRFN1 MAP1B MAP2 MARK3 NF1 NUMBL PTPN23 RIMS1 RTN4 SIPA1L1 SRC SYNGAP1 TBC1D15 TBC1D5 TIAM1       |
| GO:0007264 | small GTPase mediated signal transduction | 10.0000       | 10.0000     | ABR AGAP2 AMOT ARHGAP33 ARHGAP39 ARHGEF10 ARHGEF2 CAMK2D COL3A1 CTNNB1 DBNL DOCK5 FMNL1 G3BP2 GARNL3 GDI1 IL17RD MAP2K1 MKL1 MYO9B NF1 PDCD10 PDPK1 PKN2 PSD3 PSMD1 PSMD2 RAB3A RALGAPA1 RALGAPB REM2 SIPA1L1 SPTBN1 STARD8 SYNGAP1 TAOK1 YWHAZ                  | AGAP2 AMOT ARFGEF1 ARHGAP39 ARHGEF2 CAMK2D FMNL1 GRIN2A GRIN2B IQSEC3 KIF2A KLC2 MARK3 NF1 PDPK1 PKN2 REM2 SIPA1L1 SRC SYNGAP1 TIAM1 YWHAZ                                   |
| GO:0051640 | organelle localization                    | 10.0000       | 10.0000     | AHI1 ARHGAP21 ARHGEF2 CHGA CTNNB1 DNAJC5 MAP1B MAP1S MAP2K1 MAP4 MARK2 NPM1 PCLO PDCD10 PDPK1 RAB3A SEC22B SEC24D SYN1 SYNJ1 YWHAZ                                                                                                                               | AMPH ARHGAP21 ARHGEF2 CHGA CPLX1 HTT MAP1B NAPA NPM1 PCLO PDPK1 RIMS1 SCFD1 SEC22B SYN1 SYNJ1 YWHAZ                                                                          |
| GO:0051656 | establishment of organelle localization   | 10.0000       | 10.0000     | AHI1 ARHGAP21 ARHGEF2 CTNNB1 DNAJC5 MAP1B MAP1S MAP2K1 MAP4 NPM1 PCLO PDCD10 RAB3A SEC22B SEC24D SYN1 SYNJ1 YWHAZ                                                                                                                                                | AMPH ARHGAP21 ARHGEF2 CPLX1 HTT MAP1B NAPA NPM1 PCLO RIMS1 SCFD1 SEC22B SYN1 SYNJ1 YWHAZ                                                                                     |
| GO:1902580 | single-organism cellular localization     | 10.0000       | 10.0000     | ABLIM3 ARHGAP21 ARHGEF2 ATP8A1 C2CD5 CHGA CTNNB1 DBN1 DNAJC5 G3BP2 GDI1 GPR158 KCNB1 MAP1B MAP1S MAP2K1 MAP4 MAP7 NF1 NPM1 PACS1 PCLO PDPK1 RAB3A SEC22B SEC24D SLC9A1 SPTBN1 SULF2 SYN1 SYNGAP1 SYNJ1 TNIK YWHAZ                                                | ABLIM3 AKT2 AMPH ARHGAP21 ARHGEF2 CHGA CPLX1 EHD3 GRIN2B HTT KCNB1 MAP1B NAPA NF1 NPM1 PACS1 PCLO PDE2A PDPK1 RIMS1 RPS3 SCFD1 SEC22B SYN1 SYNGAP1 SYNJ1 TIAM1 TRAPPC8 YWHAZ |
| GO:0007612 | learning                                  | 10.0000       | 10.0000     | ATP1A3 ATP8A1 CACNA1E CTNND2 HRH3 NF1 PDE1B PPP1R1B SLC8A2 SYNGAP1 SYNJ1                                                                                                                                                                                         | AMPH COMT GRIN2A GRIN2B HTT NF1 PDE1B PPP1R1B SYNGAP1 SYNJ1                                                                                                                  |

|            |                                      |         |         |                                                                                                                                                                                                                                                                                  |                                                                                                                                                                                              |
|------------|--------------------------------------|---------|---------|----------------------------------------------------------------------------------------------------------------------------------------------------------------------------------------------------------------------------------------------------------------------------------|----------------------------------------------------------------------------------------------------------------------------------------------------------------------------------------------|
| GO:0060341 | regulation of cellular localization  | 10.0000 | 10.0000 | ABLIM3 ABR ADCY5 AH11 APC C2CD2L C2CD5 CACNA1B CACNA1E CAMK2D CHGA CTNNB1 DBN1 G3BP2 GDI1 HRH3 KCNB1 MAP1B MAP2K1 NEDD4L NF1 PCLO PDPK1 PIK3C3 PYCARD RAB3A RALGAPB RTN4 SIRT2 SLC9A1 SNX12 SPTBN1 SRCIN1 SULF2 SYN1 SYNJ1 YWHAZ                                                 | ABLIM3 AKT2 APC ASTN2 CAMK2D CHGA CPLX1 GRIN2B HTT KCNA2 KCNB1 MAP1B NAPA NF1 PCLO PDE2A PDPK1 PKDREJ PRKCB PTPN23 RIMS1 RTN4 SCFD1 SRC SYN1 SYNJ1 TIAM1 YWHAZ                               |
| GO:0007010 | cytoskeleton organization            | 10.0000 | 10.0000 | ABLIM3 ABR AGAP2 AMOT APC ARHGEF10 ARHGEF2 BRSK1 CAMSAP1 CAMSAP2 CRMP1 CSNK1A1 CTNNB1 DBN1 DBNL FMNL1 MAP1A MAP1B MAP1S MAP2 MAP4 MAP7 MARK2 MYCBP2 NF1 NPM1 PCLO PDCD10 PDPK1 PYCARD SIPA1L1 SIRT2 SLC9A1 SPTBN1 STRIP1 SYNPO TAOK1 TNIK                                        | ABLIM3 AGAP2 AMOT APC ARFGEF1 ARHGEF2 CDC42BPB EML2 FHOD1 FMNL1 HTT IQSEC3 KANK3 KIF2A MAP1A MAP1B MAP2 NF1 NPM1 PCLO PDPK1 RPS3 SCIN SIPA1L1 SRC SYNPO                                      |
| GO:0007409 | axonogenesis                         | 10.0000 | 5.9321  | ABLIM3 AGAP2 AP2A1 APC ARHGAP39 BRSK1 CAMK2D COL3A1 CRMP1 DBN1 DPYSL5 GAP43 GDI1 IL17RD MAG MAP1B MAP2 MAP2K1 MARK2 MYCBP2 NF1 PSMD1 PSMD2 RAB3A RTN4 SIPA1L1 SLC9A6 SPTBN1 SYNGAP1 TOP2B                                                                                        | ABLIM3 AGAP2 AP2A1 APC ARHGAP39 BCL11B CAMK2D GRIN2A GRIN2B LRFN1 MAP1B MAP2 MARK3 NF1 NUMBL RTN4 SIPA1L1 SRC SYNGAP1 TIAM1                                                                  |
| GO:0048666 | neuron development                   | 10.0000 | 5.8393  | ABLIM3 AGAP2 AH11 AP2A1 APC ARHGAP39 ASAP1 BRSK1 CAMK2D CAMSAP1 CAMSAP2 COL3A1 CRMP1 CTNND2 DBN1 DBNL DPYSL5 GAP43 GBA2 GDI1 GPRIN1 IL17RD LRRC7 MAG MAP1B MAP1S MAP2 MAP2K1 MAP4 MARK2 MYCBP2 NEDD4L NF1 PSMD1 PSMD2 RAB3A RTN4 SIPA1L1 SLC9A6 SPTBN1 SRCIN1 SYNGAP1 TNIK TOP2B | ABLIM3 AGAP2 AP2A1 APC ARFGEF1 ARHGAP39 ASAP1 BCL11B CAMK2D GPRIN1 GRIN2A GRIN2B HCN1 HTT LRFN1 MAP1B MAP2 MARK3 NF1 NUMBL RIMS1 RTN4 SIPA1L1 SRC SYNGAP1 TIAM1 UBE4B                        |
| GO:0031175 | neuron projection development        | 10.0000 | 5.7384  | ABLIM3 AGAP2 AH11 AP2A1 APC ARHGAP39 ASAP1 BRSK1 CAMK2D CAMSAP1 CAMSAP2 COL3A1 CRMP1 CTNND2 DBN1 DBNL DPYSL5 GAP43 GDI1 GPRIN1 IL17RD LRRC7 MAG MAP1B MAP1S MAP2 MAP2K1 MAP4 MARK2 MYCBP2 NEDD4L NF1 PSMD1 PSMD2 RAB3A RTN4 SIPA1L1 SLC9A6 SPTBN1 SRCIN1 SYNGAP1 TNIK TOP2B      | ABLIM3 AGAP2 AP2A1 APC ARFGEF1 ARHGAP39 ASAP1 BCL11B CAMK2D GPRIN1 GRIN2A GRIN2B LRFN1 MAP1B MAP2 MARK3 NF1 NUMBL RIMS1 RTN4 SIPA1L1 SRC SYNGAP1 TIAM1 UBE4B                                 |
| GO:0016192 | vesicle-mediated transport           | 5.7358  | 10.0000 | AAK1 ABR AH11 AP2A1 AP4E1 ARHGAP21 ATP6V1H ATP8A1 C2CD5 CHGA COL3A1 CSNK1A1 CTNNB1 DBNL DNAJC5 GAPVD1 KCNB1 MAP2K1 NEDD4L PACS1 PCLO PDPK1 PIK3C3 PUM1 PYCARD RAB3A SEC22B SEC24D SGIP1 SNX12 SPTBN1 SRCIN1 SYN1 SYNJ1 YWHAZ                                                     | AAK1 AKT2 AMPH AP2A1 AP4E1 ARFGEF1 ARHGAP21 CHGA CPLX1 EHD3 GAPVD1 HTT KCNB1 KIF17 NAPA PACS1 PCLO PDPK1 PKDREJ PTPN23 RAB11FIP2 RIMS1 SCFD1 SCIN SEC22B SRC SYN1 SYNJ1 TBC1D5 TRAPPC8 YWHAZ |
| GO:0051336 | regulation of hydrolase activity     | 10.0000 | 5.7298  | ABR ADCY5 ADCY9 AGAP2 AMOT ARHGAP21 ARHGAP33 ARHGEF10 ARHGEF2 ASAP1 CAMK2D DBN1 DOCK5 GAPVD1 GARNL3 GDI1 LMTK3 MAP2K1 MKL1 MYO9B NF1 NPM1 PDE1B PDPK1 PSD3 PYCARD RAB3A RALGAPA1 RALGAPB SIPA1L1 SLC39A10 STARD8 SYNGAP1 TBC1D15                                                 | AGAP2 AKT2 AMOT AMPH ARFGEF1 ARHGAP21 ARHGEF2 ASAP1 CAMK2D GAPVD1 HNRNPU HTT IQSEC3 LMTK3 NF1 NPM1 PDE1B PDPK1 RPS3 SIPA1L1 SRC SYNGAP1 TBC1D15 TBC1D5 TIAM1 UBXN1                           |
| GO:0061564 | axon development                     | 10.0000 | 5.6612  | ABLIM3 AGAP2 AP2A1 APC ARHGAP39 BRSK1 CAMK2D COL3A1 CRMP1 DBN1 DPYSL5 GAP43 GDI1 IL17RD MAG MAP1B MAP2 MAP2K1 MARK2 MYCBP2 NF1 PSMD1 PSMD2 RAB3A RTN4 SIPA1L1 SLC9A6 SPTBN1 SYNGAP1 TOP2B                                                                                        | ABLIM3 AGAP2 AP2A1 APC ARHGAP39 BCL11B CAMK2D GRIN2A GRIN2B LRFN1 MAP1B MAP2 MARK3 NF1 NUMBL RTN4 SIPA1L1 SRC SYNGAP1 TIAM1                                                                  |
| GO:0033043 | regulation of organelle organization | 5.5866  | 10.0000 | ABLIM3 AMOT APC ARHGEF10 ARHGEF2 ATXN2L C2CD5 CAMK2D CAMSAP2 CTNNB1 DBN1 DBNL HNRNPC MAP1A MAP1B MAP1S MAP2K1 MARK2 MYCBP2 NPM1 PYCARD RAB3A SEC22B SIRT2 SLC9A1 SPTBN1 SYNPO TAOK1 TBC1D15                                                                                      | ABLIM3 AKT2 AMOT APC ARFGEF1 ARHGEF2 ATXN2L CAMK2D EML2 ERCC4 FHOD1 HNRNPU HTT KANK3 MAP1A MAP1B NPM1 RPS3 SCFD1 SCIN SEC22B SRC SYNPO TBC1D15 TBC1D5 YWHAZ                                  |

|            |                                                       |         |         |                                                                                                                                                                                                                                |                                                                                                                                                                       |
|------------|-------------------------------------------------------|---------|---------|--------------------------------------------------------------------------------------------------------------------------------------------------------------------------------------------------------------------------------|-----------------------------------------------------------------------------------------------------------------------------------------------------------------------|
|            |                                                       |         |         | YWHAZ                                                                                                                                                                                                                          |                                                                                                                                                                       |
| GO:0048812 | neuron projection morphogenesis                       | 10.0000 | 5.4657  | ABLIM3 AGAP2 AP2A1 APC ARHGAP39 BRSK1 CAMK2D COL3A1 CRMP1 CTNND2 DBN1 DBNL DPYSL5 GAP43 GDI1 IL17RD MAG MAP1B MAP1S MAP2 MAP2K1 MARK2 MYCBP2 NEDD4L NF1 PSMD1 PSMD2 RAB3A RTN4 SIPA1L1 SLC9A6 SPTBN1 SRCIN1 SYNGAP1 TNIK TOP2B | ABLIM3 AGAP2 AP2A1 APC ARHGAP39 BCL11B CAMK2D GRIN2A GRIN2B LRFN1 MAP1B MAP2 MARK3 NF1 NUMBL RIMS1 RTN4 SIPA1L1 SRC SYNGAP1 TIAM1                                     |
| GO:0043087 | regulation of GTPase activity                         | 10.0000 | 5.4589  | ABR AGAP2 AMOT ARHGAP21 ARHGAP33 ARHGEF10 ARHGEF2 ASAP1 DOCK5 GAPVD1 GARNL3 GDI1 MAP2K1 MYO9B NF1 PSD3 PYCARD RALGAPA1 RALGAPB SIPA1L1 STARD8 SYNGAP1 TBC1D15                                                                  | AGAP2 AKT2 AMPH ARFGEF1 ARHGAP21 ARHGEF2 ASAP1 GAPVD1 IQSEC3 NF1 SIPA1L1 SYNGAP1 TBC1D15 TBC1D5 TIAM1                                                                 |
| GO:0043547 | positive regulation of GTPase activity                | 10.0000 | 5.3319  | ABR AGAP2 ARHGAP21 ARHGAP33 ARHGEF10 ARHGEF2 ASAP1 DOCK5 GAPVD1 GARNL3 GDI1 MAP2K1 MYO9B NF1 PSD3 RALGAPA1 RALGAPB SIPA1L1 STARD8 SYNGAP1 TBC1D15                                                                              | AGAP2 AKT2 AMPH ARFGEF1 ARHGAP21 ARHGEF2 ASAP1 GAPVD1 IQSEC3 NF1 SIPA1L1 SYNGAP1 TBC1D15 TBC1D5 TIAM1                                                                 |
| GO:0048667 | cell morphogenesis involved in neuron differentiation | 10.0000 | 5.1540  | ABLIM3 AGAP2 AP2A1 APC ARHGAP39 BRSK1 CAMK2D COL3A1 CRMP1 CTNND2 DBN1 DPYSL5 GAP43 GDI1 IL17RD MAG MAP1B MAP2 MAP2K1 MARK2 MYCBP2 NF1 PSMD1 PSMD2 RAB3A RTN4 SIPA1L1 SLC9A6 SPTBN1 SRCIN1 SYNGAP1 TNIK TOP2B                   | ABLIM3 AGAP2 AP2A1 APC ARHGAP39 BCL11B CAMK2D GRIN2A GRIN2B LRFN1 MAP1B MAP2 MARK3 NF1 NUMBL RTN4 SIPA1L1 SRC SYNGAP1 TIAM1                                           |
| GO:0048011 | neurotrophin TRK receptor signaling pathway           | 10.0000 | 5.1040  | ABR ADCY5 ADCY9 AP2A1 ARHGEF2 CAMK2D IL17RD MAG MAP2K1 NF1 PDE1B PDPK1 PSMD1 PSMD2 RTN4 SLC9A6 SPTBN1 SYNGAP1                                                                                                                  | AP2A1 ARHGEF2 CAMK2D GRIN2A GRIN2B MARK3 NF1 PDE1B PDPK1 RTN4 SRC SYNGAP1 TIAM1                                                                                       |
| GO:0007267 | cell-cell signaling                                   | 5.1035  | 10.0000 | ADCY5 ADCY9 AP2A1 APBA1 BRSK1 C2CD2L CACNA1B CACNA1E CAMK2D CSPG5 CTNNB1 CTNND2 DBN1 DNAJC5 HRH3 KCNB1 NF1 PCDH1 PCLO PDPK1 PPFIA4 RAB3A SIPA1L1 SLC6A11 SLC8A2 SYN1 SYN2 SYN3 SYNGAP1 SYNJ1 TJP1 YWHAZ                        | AMPH AP2A1 BCAN BSN CAMK2D COMT CPLX1 GNG3 GRIN2A GRIN2B HCN1 HTT KCNA2 KCNB1 NAPA NF1 PCLO PDPK1 PRKCB RAB11FIP2 RIMS1 SIPA1L1 SYN1 SYNGAP1 SYNJ1 TIAM1 TOLLIP YWHAZ |
| GO:0030029 | actin filament-based process                          | 10.0000 | 5.0963  | ABLIM3 ABR AGAP2 AMOT ARHGEF10 ARHGEF2 ATP1A1 CAMK2D DBN1 DBNL FMNL1 MYO9B NEDD4L NF1 PDCD10 PDPK1 PYCARD SIPA1L1 SLC9A1 SPTBN1 STRIP1 SYNPO TNIK                                                                              | ABLIM3 AGAP2 AMOT ARFGEF1 ARHGEF2 CAMK2D CDC42BPB FHOD1 FMNL1 IQSEC3 KANK3 NF1 PDPK1 SCIN SIPA1L1 SRC SYNPO                                                           |
| GO:0038179 | neurotrophin signaling pathway                        | 10.0000 | 5.0696  | ABR ADCY5 ADCY9 AP2A1 ARHGEF2 CAMK2D IL17RD MAG MAP2K1 NF1 PDE1B PDPK1 PSMD1 PSMD2 RTN4 SLC9A6 SPTBN1 SYNGAP1                                                                                                                  | AP2A1 ARHGEF2 CAMK2D GRIN2A GRIN2B MARK3 NF1 PDE1B PDPK1 RTN4 SRC SYNGAP1 TIAM1                                                                                       |
| GO:0051345 | positive regulation of hydrolase activity             | 10.0000 | 4.9161  | ABR ADCY5 ADCY9 AGAP2 ARHGAP21 ARHGAP33 ARHGEF10 ARHGEF2 ASAP1 DOCK5 GAPVD1 GARNL3 GDI1 MAP2K1 MYO9B NF1 PDE1B PDPK1 PSD3 PYCARD RAB3A RALGAPA1 RALGAPB SIPA1L1 SLC39A10 STARD8 SYNGAP1 TBC1D15                                | AGAP2 AKT2 AMPH ARFGEF1 ARHGAP21 ARHGEF2 ASAP1 GAPVD1 HNRNPU IQSEC3 NF1 PDE1B PDPK1 RPS3 SIPA1L1 SYNGAP1 TBC1D15 TBC1D5 TIAM1                                         |
| GO:0001505 | regulation of neurotransmitter levels                 | 10.0000 | 4.8415  | APBA1 BRSK1 CACNA1B DNAJC5 HRH3 NF1 PCLO PDE1B PPFIA4 RAB3A SLC6A11 SYN1 SYN2 SYN3 SYNJ1                                                                                                                                       | COMT CPLX1 NAPA NF1 PCLO PDE1B RIMS1 SYN1 SYNJ1                                                                                                                       |



|            |                                                         |         |         |                                                                                                                                                                                                                     |                                                                                                                                       |
|------------|---------------------------------------------------------|---------|---------|---------------------------------------------------------------------------------------------------------------------------------------------------------------------------------------------------------------------|---------------------------------------------------------------------------------------------------------------------------------------|
| GO:0032940 | secretion by cell                                       | 5.1006  | 5.6649  | ABR ADCY5 AHI1 APBA1 BRSK1 C2CD2L CACNA1B CACNA1E CHGA DNAJC5 HRH3 KCNB1 NF1 PCLO PDPK1 PIK3C3 PPFIA4 PYCARD RAB3A RTN4 SLC6A11 SPTBN1 SRCIN1 SYN1 SYN2 SYN3 SYNJ1 YWHAZ                                            | ARFGEF1 CHGA CPLX1 GRIN2B HTT KCNA2 KCNB1 NAPA NF1 PCLO PDPK1 PKDREJ PRKCB RAB11FIP2 RIMS1 RTN4 SCFD1 SCIN SRC SYN1 SYNJ1 TIAM1 YWHAZ |
| GO:0007163 | establishment or maintenance of cell polarity           | 5.4304  | 5.1746  | AMOT APC ARHGEF2 BRSK1 MAP1B MAP2 MAP4 MAP7 MARK2 MYO9B SLC9A1                                                                                                                                                      | AMOT APC ARFGEF1 ARHGEF2 CDC42BPB HTT MAP1B MAP2 RAB11FIP2                                                                            |
| GO:1901653 | cellular response to peptide                            | 4.8994  | 5.2205  | ADCY5 ADCY9 ARHGEF2 ATP6V1H C2CD5 CAMK2D CTNNB1 IL17RD MAP2K1 NF1 PDPK1 PIK3C3 PRKAB1 PSMD1 PSMD2 SLC9A1 SPTBN1 SYNGAP1                                                                                             | AKT2 ARHGEF2 CAMK2D GNG3 GRIN2A GRIN2B MARK3 NF1 NUCKS1 PDPK1 PRKAB2 PRKAG2 PRKCB SRC SYNGAP1                                         |
| GO:0022603 | regulation of anatomical structure morphogenesis        | 10.0000 |         | ABR AHI1 AMOT APC CAMSAP1 CTNNB1 DBN1 EPB42 FMNL1 GDI1 HSPB1 ITGA7 MAG MAP1B MAP2 MAP2K1 MARK2 MTDH NEDD4L NF1 PDCD10 RTN4 SIPA1L1 SRCIN1 STRIP1 SULF2 SYNGAP1 TBC1D15 TNIK                                         |                                                                                                                                       |
| GO:0051056 | regulation of small GTPase mediated signal transduction | 10.0000 |         | ABR AMOT ARHGAP33 ARHGAP39 ARHGEF10 ARHGEF2 CAMK2D COL3A1 GARNL3 GDI1 MAP2K1 MYO9B NF1 PDCD10 PSD3 RALGAPA1 RALGAPB SIPA1L1 STARD8 SYNGAP1                                                                          |                                                                                                                                       |
| GO:0051494 | negative regulation of cytoskeleton organization        |         | 10.0000 |                                                                                                                                                                                                                     | APC ARFGEF1 ARHGEF2 EML2 KANK3 MAP1A MAP1B NPM1 SCIN                                                                                  |
| GO:0006887 | exocytosis                                              |         | 10.0000 |                                                                                                                                                                                                                     | ARFGEF1 CHGA CPLX1 KCNB1 NAPA PCLO PDPK1 PKDREJ RAB11FIP2 RIMS1 SCFD1 SCIN SYN1 SYNJ1 YWHAZ                                           |
| GO:0010256 | endomembrane system organization                        | 10.0000 |         | ARHGAP21 C2CD5 COL4A3BP CSNK1A1 GPR158 KCNB1 MAP2K1 MAP7 NDRG1 PACS1 PDCD10 PDPK1 PIK3C3 RTN4 SGIP1 SPTBN1 SYNJ1 TNIK VCIPI1 YWHAZ                                                                                  |                                                                                                                                       |
| GO:0007269 | neurotransmitter secretion                              | 10.0000 |         | APBA1 BRSK1 CACNA1B DNAJC5 HRH3 NF1 PCLO PPFIA4 RAB3A SLC6A11 SYN1 SYN2 SYN3 SYNJ1                                                                                                                                  |                                                                                                                                       |
| GO:0044087 | regulation of cellular component biogenesis             |         | 10.0000 |                                                                                                                                                                                                                     | AMOT APC ARFGEF1 ATXN2L CHGA EML2 FHOD1 HTT KANK3 MAP1B NAPA NPM1 RIMS1 RPS3 SCFD1 SCIN SRC SYNPO TBC1D15 TBC1D5                      |
| GO:0000904 | cell morphogenesis involved in differentiation          | 10.0000 |         | ABLIM3 AGAP2 AP2A1 APC ARHGAP39 BRSK1 CAMK2D COL3A1 CRMP1 CTNNB1 CTNND2 DBN1 DPYSL5 GAP43 GDI1 IL17RD MAG MAP1B MAP2 MAP2K1 MARK2 MYCBP2 NF1 PSMD1 PSMD2 RAB3A RTN4 SIPA1L1 SLC9A6 SPTBN1 SRCIN1 SYNGAP1 TNIK TOP2B |                                                                                                                                       |
| GO:0060627 | regulation of vesicle-mediated transport                |         | 10.0000 |                                                                                                                                                                                                                     | AAK1 AKT2 ARHGAP21 CPLX1 KCNB1 NAPA PCLO PDPK1 PKDREJ PTPN23 RIMS1 SCFD1 SRC SYN1 SYNJ1 TBC1D5                                        |

|            |                                                                  |         |        |                                                                                                                                                                                 |                                                                                  |
|------------|------------------------------------------------------------------|---------|--------|---------------------------------------------------------------------------------------------------------------------------------------------------------------------------------|----------------------------------------------------------------------------------|
| GO:0006836 | neurotransmitter transport                                       | 10.0000 |        | APBA1 BRSK1 CACNA1B DNAJC5 HRH3 NF1 PCLO PPFIA4 RAB3A SLC6A11 SYN1 SYN2 SYN3 SYNJ1                                                                                              |                                                                                  |
| GO:0007265 | Ras protein signal transduction                                  | 5.9502  |        | ABR ARHGEF10 ARHGEF2 CAMK2D COL3A1 DBNL G3BP2 GDI1 IL17RD MAP2K1 MYO9B NF1 PDCD10 PSD3 PSMD1 PSMD2 RALGAPB SPTBN1 SYNGAP1                                                       |                                                                                  |
| GO:0007169 | transmembrane receptor protein tyrosine kinase signaling pathway | 5.9234  |        | ABR ADCY5 ADCY9 AHI1 AP2A1 ARHGEF2 ATP6V1H C2CD5 CAMK2D CTNNB1 HSPB1 IL17RD MAG MAP2K1 NF1 PDE1B PDPK1 PIK3C3 PRKAB1 PSMD1 PSMD2 RTN4 SIPA1L1 SIRT2 SLC9A6 SPTBN1 SULF2 SYNGAP1 |                                                                                  |
| GO:0010639 | negative regulation of organelle organization                    |         | 5.9090 |                                                                                                                                                                                 | APC ARFGF1 ARHGEF2 EML2 ERCC4 HNRNPU KANK3 MAP1A MAP1B NPM1 SCFD1 SCIN SRC       |
| GO:0051493 | regulation of cytoskeleton organization                          | 5.8864  |        | AMOT APC ARHGEF10 ARHGEF2 CTNNB1 DBN1 DBNL MAP1A MAP1B MARK2 MYCBP2 NPM1 PYCARD SIRT2 SLC9A1 SPTBN1 SYNPO TAOK1                                                                 |                                                                                  |
| GO:0008286 | insulin receptor signaling pathway                               |         | 5.8526 |                                                                                                                                                                                 | AKT2 CAMK2D GRIN2A GRIN2B MARK3 NF1 NUCKS1 PDPK1 PRKAB2 PRKAG2 PRKCB SRC SYNGAP1 |
| GO:0023061 | signal release                                                   | 5.7546  |        | ADCY5 APBA1 BRSK1 C2CD2L CACNA1B CACNA1E DNAJC5 HRH3 KCNB1 NF1 PCLO PPFIA4 RAB3A SLC6A11 SYN1 SYN2 SYN3 SYNJ1 YWHAZ                                                             |                                                                                  |
| GO:0055067 | monovalent inorganic cation homeostasis                          | 5.6749  |        | ANPEP ATP1A1 ATP1A3 ATP4A ATP6V1H CAMK2D NEDD4L SLC4A4 SLC9A1 SLC9A6                                                                                                            |                                                                                  |
| GO:0006883 | cellular sodium ion homeostasis                                  | 5.5297  |        | ATP1A1 ATP1A3 ATP4A NEDD4L SLC9A1                                                                                                                                               |                                                                                  |
| GO:0016079 | synaptic vesicle exocytosis                                      |         | 5.5016 |                                                                                                                                                                                 | CPLX1 NAPA PCLO RIMS1 SYN1 SYNJ1                                                 |
| GO:0022604 | regulation of cell morphogenesis                                 | 5.4930  |        | CAMSAP1 CTNNB1 DBN1 EPB42 FMNL1 GDI1 ITGA7 MAG MAP1B MAP2 MAP2K1 MARK2 NEDD4L RTN4 SIPA1L1 SRCIN1 STRIP1 SYNGAP1 TBC1D15 TNIK                                                   |                                                                                  |
| GO:0008306 | associative learning                                             |         | 5.4854 |                                                                                                                                                                                 | GRIN2A GRIN2B HTT NF1 PDE1B PPP1R1B SYNGAP1                                      |
| GO:0048167 | regulation of synaptic plasticity                                |         | 5.4831 |                                                                                                                                                                                 | BCAN GRIN2A GRIN2B HTT KCNB1 NF1 RIMS1 SIPA1L1 SYNGAP1                           |
| GO:0008542 | visual learning                                                  |         | 5.4110 |                                                                                                                                                                                 | GRIN2A HTT NF1 PDE1B PPP1R1B SYNGAP1                                             |
| GO:0032880 | regulation of protein localization                               | 5.4068  |        | AAK1 ABLIM3 ADCY5 AHI1 APC C2CD2L C2CD5 CACNA1E CTNNB1 DBN1 G3BP2 GAPVD1 GDI1 KCNB1 MYCBP2 NEDD4L NF1 PDPK1 PIK3C3 PYCARD RALGAPB                                               |                                                                                  |

|            |                                                      |        |        |                                                 |                                                                                                                                                 |
|------------|------------------------------------------------------|--------|--------|-------------------------------------------------|-------------------------------------------------------------------------------------------------------------------------------------------------|
|            |                                                      |        |        | SIRT2 SLC9A1 SNX12 SPTBN1 SRCIN1<br>SULF2 YWHAZ |                                                                                                                                                 |
| GO:0048169 | regulation of long-term neuronal synaptic plasticity |        | 5.3573 |                                                 | GRIN2A GRIN2B NF1 RIMS1 SYNGAP1                                                                                                                 |
| GO:1901701 | cellular response to oxygen-containing compound      |        | 5.3434 |                                                 | AKT2 ARHGEF2 CAMK2D GNG3 GRIN2A GRIN2B HCN1 HNRNPU KCNB1 MARK3 NF1 NUCKS1 PDE2A PDPK1 PRKAB2 PRKAG2 PRKCB RAB11FIP2 RPS3 SRC SYNGAP1 TIAM1 YAP1 |
| GO:0090168 | Golgi reassembly                                     | 5.3265 |        | PDCD10 VCIPI1 YWHAZ                             |                                                                                                                                                 |
| GO:0046903 | secretion                                            |        | 5.3185 |                                                 | ARFGEF1 CHGA COMT CPLX1 GRIN2B HTT KCNA2 KCNB1 NAPA NF1 PCLO PDPK1 PKDREJ PRKCB RAB11FIP2 RIMS1 RTN4 SCFD1 SCIN SRC SYN1 SYNJ1 TIAM1 YWHAZ      |
| GO:0050804 | modulation of synaptic transmission                  |        | 5.2944 |                                                 | BCAN GRIN2A GRIN2B HTT KCNB1 NAPA NF1 RIMS1 SIPA1L1 SYN1 SYNGAP1 SYNJ1                                                                          |
| GO:1901699 | cellular response to nitrogen compound               |        | 5.2873 |                                                 | AKT2 ARHGEF2 CAMK2D GNG3 GRIN2A GRIN2B HCN1 MARK3 NF1 NPM1 NUCKS1 PDE2A PDPK1 PRKAB2 PRKAG2 PRKCB SRC SYNGAP1                                   |
| GO:0030036 | actin cytoskeleton organization                      |        | 5.2766 |                                                 | ABLIM3 AGAP2 AMOT ARFGEF1 ARHGEF2 CDC42BPB FHOD1 FMNL1 IQSEC3 KANK3 NF1 PDPK1 SCIN SIPA1L1 SRC SYNPO                                            |
| GO:0048168 | regulation of neuronal synaptic plasticity           |        | 5.2398 |                                                 | BCAN GRIN2A GRIN2B NF1 RIMS1 SYNGAP1                                                                                                            |
| GO:1902001 | fatty acid transmembrane transport                   |        | 5.2314 |                                                 | ABCC1 AKT2 PRKAB2 PRKAG2                                                                                                                        |
| GO:0007632 | visual behavior                                      |        | 5.1989 |                                                 | GRIN2A HTT NF1 PDE1B PPP1R1B SYNGAP1                                                                                                            |
| GO:0071417 | cellular response to organonitrogen compound         |        | 5.1386 |                                                 | AKT2 ARHGEF2 CAMK2D GNG3 GRIN2A GRIN2B HCN1 MARK3 NF1 NUCKS1 PDE2A PDPK1 PRKAB2 PRKAG2 PRKCB SRC SYNGAP1                                        |

|            |                                                                       |        |        |                                                                                                |                                                                                                             |
|------------|-----------------------------------------------------------------------|--------|--------|------------------------------------------------------------------------------------------------|-------------------------------------------------------------------------------------------------------------|
| GO:0008543 | fibroblast growth factor receptor signaling pathway                   | 5.1121 |        | ADCY5 ADCY9 CAMK2D CTNNB1 IL17RD<br>MAP2K1 NF1 PDE1B PDPK1 PSMD1<br>PSMD2 SPTBN1 SULF2 SYNGAP1 |                                                                                                             |
| GO:0031111 | negative regulation of microtubule polymerization or depolymerization |        | 5.1112 |                                                                                                | APC ARHGEF2 EML2 MAP1A MAP1B                                                                                |
| GO:0051650 | establishment of vesicle localization                                 |        | 5.1039 |                                                                                                | AMPH CPLX1 HTT NAPA PCLO<br>RIMS1 SCFD1 SEC22B SYN1 SYNJ1                                                   |
| GO:0050688 | regulation of defense response to virus                               | 5.0975 |        | ALKBH5 AP2A1 ATP6V1H CSPG5<br>KIAA1549L MAP1A PACS1 PNPO PUM1<br>PYCARD TNIK                   |                                                                                                             |
| GO:0030007 | cellular potassium ion homeostasis                                    | 5.0830 |        | ATP1A1 ATP1A3 ATP4A CAMK2D                                                                     |                                                                                                             |
| GO:0035725 | sodium ion transmembrane transport                                    | 5.0562 |        | ATP1A1 ATP1A3 ATP4A CAMK2D NEDD4L<br>SLC4A4 SLC8A2 SLC9A1 SLC9A6                               |                                                                                                             |
| GO:0032869 | cellular response to insulin stimulus                                 |        | 5.0242 |                                                                                                | AKT2 CAMK2D GRIN2A GRIN2B<br>MARK3 NF1 NUCKS1 PDPK1<br>PRKAB2 PRKAG2 PRKCB SRC<br>SYNGAP1                   |
| GO:0031110 | regulation of microtubule polymerization or depolymerization          |        | 4.9678 |                                                                                                | APC ARHGEF2 EML2 MAP1A MAP1B<br>RPS3                                                                        |
| GO:0071436 | sodium ion export                                                     | 4.9405 |        | ATP1A1 ATP1A3 ATP4A SLC9A1                                                                     |                                                                                                             |
| GO:0048313 | Golgi inheritance                                                     | 4.9405 |        | MAP2K1 PDCD10 VCIPI1 YWHAZ                                                                     |                                                                                                             |
| GO:0051046 | regulation of secretion                                               |        | 4.9003 |                                                                                                | CHGA COMT CPLX1 GRIN2B KCNA2<br>KCNB1 NAPA NF1 PCLO PDPK1<br>PKDREJ PRKCB RIMS1 RTN4 SCIN<br>SRC SYN1 TIAM1 |

|            |                                                |  |        |  |                                                                                                                                                |
|------------|------------------------------------------------|--|--------|--|------------------------------------------------------------------------------------------------------------------------------------------------|
| GO:0051648 | vesicle localization                           |  | 4.8981 |  | AMPH CPLX1 HTT NAPA PCLO<br>RIMS1 SCFD1 SEC22B SYN1 SYNJ1                                                                                      |
| GO:0061024 | membrane organization                          |  | 4.8699 |  | AKT2 AP4E1 EHD3 GRIN2B HTT<br>KCNB1 NAPA NUP210 PACS1 PDPK1<br>PRKAB2 PRKAG2 PRKCB RIMS1<br>RPS3 SCFD1 SEC22B SRC<br>SYNGAP1 SYNJ1 TIAM1 YWHAZ |
| GO:0048489 | synaptic vesicle transport                     |  | 4.8353 |  | AMPH CPLX1 NAPA PCLO RIMS1<br>SYN1 SYNJ1                                                                                                       |
| GO:0097480 | establishment of synaptic vesicle localization |  | 4.8353 |  | AMPH CPLX1 NAPA PCLO RIMS1<br>SYN1 SYNJ1                                                                                                       |



**Supplementary Table S13: Biological processes altered by the common proteins up-and down-phosphorylated in the cerebellum of Tg(*Dyrk1a*) and Ts65Dn mice, and reverted by L41 treatment. ToppCluster analysis.**

| ID         | GO: Biological Process                         | TgDyrk1a | Ts65Dn<br>logP | TgDyrk1a                                                                                                                                                                                                                                               | Ts65Dn                                                                                                                                                                                                                                                                                                    |
|------------|------------------------------------------------|----------|----------------|--------------------------------------------------------------------------------------------------------------------------------------------------------------------------------------------------------------------------------------------------------|-----------------------------------------------------------------------------------------------------------------------------------------------------------------------------------------------------------------------------------------------------------------------------------------------------------|
| pValues    |                                                |          |                | Gene List                                                                                                                                                                                                                                              |                                                                                                                                                                                                                                                                                                           |
| GO:0048858 | cell projection morphogenesis                  | 10.0000  | 10.0000        | ABLIM2 ARHGAP35 ARHGEF12 ASAP1 BRSK1 DCLK1 DOCK7 DPYSL3 FEZ1 GSK3B HTT KIF13B MAP1B MAP2 MAP4K4 MAPT PACSIN1 PARK2 PLXNB3 PSMD1 RIMS1 RIMS2 RUFY3 SPRED1 SPTBN1 SPTBN2 SPTBN4 SRCIN1 STMN1 TBC1D22B TNIK TOP2B USP9X                                   | ABLIM2 ANK1 ARHGEF12 CAMK2B COL3A1 CSNK1D CTTN DCLK1 DNM1 DPYSL2 DPYSL5 EGFR EP300 GIT1 GOLGA4 HTT IMPACT KCNQ2 KIF13B MAP1B MAP2 MINK1 NEFH PAK1 PLEKHO1 PLXNB3 PSMD4 PTPRZ1 PVRL1 RAB3A RAPGEF2 ROBO2 RTN4 SHANK1 SHANK3 SPTBN2 SPTBN4 SRGAP2 TIAM1 TOP2B                                               |
| GO:0051640 | organelle localization                         | 10.0000  | 10.0000        | AP3D1 ARFGAP1 ARHGAP21 CHMP6 CLUH CTNNB1 DOCK7 FEZ1 GBF1 HTT MAP1B MAPT MYO5A NLGN2 PACSIN1 PARK2 PCLO PDPK1 RIMS1 RIMS2 SPIRE1 SPTBN2 SYN1                                                                                                            | AMPH AP3B2 ARHGAP21 ARHGEF2 CSNK1D DNM1 DPYSL2 DYNC111 FMN2 HTT MAGI2 MAP1B MAP4 MYO5A PCLO PDPK1 RAB3A RAP1B SEC16A SPTBN2 STX1B SYN1                                                                                                                                                                    |
| GO:0048666 | neuron development                             | 10.0000  | 10.0000        | ABLIM2 ANKS1A ARHGAP35 ARHGEF12 ASAP1 BRSK1 CAMSAP2 DCLK1 DOCK7 DPYSL3 FEZ1 GBA2 GSK3B HTT KIF13B MAP1B MAP2 MAP4K4 MAPT MTOR NDRG4 NLGN2 PACSIN1 PARK2 PLXNB3 PSMD1 RIMS1 RIMS2 RUFY3 SPRED1 SPTBN1 SPTBN2 SPTBN4 SRCIN1 STMN1 TNIK TOP2B UBE4B USP9X | ABLIM2 ANK1 ARHGEF12 CAMK2B CAMSAP2 COL3A1 CTNNA1 CTTN DCLK1 DNM1 DPYSL2 DPYSL5 EGFR EP300 GIT1 GOLGA4 GPRIN1 GSK3A HTT IMPACT KCNQ2 KIF13B MAGI2 MAP1B MAP2 MAP4 MINK1 NEFH PAK1 PLXNB3 PREX1 PSMD4 PTPRZ1 PVRL1 RAB3A RAPGEF2 ROBO2 RTN4 SHANK1 SHANK3 SOD1 SPTBN2 SPTBN4 SRGAP2 STRN TIAM1 TOP2B UBE4B |
| GO:0031175 | neuron projection development                  | 10.0000  | 10.0000        | ABLIM2 ARHGAP35 ARHGEF12 ASAP1 BRSK1 CAMSAP2 DCLK1 DOCK7 DPYSL3 FEZ1 GSK3B KIF13B MAP1B MAP2 MAP4K4 MAPT MTOR NDRG4 NLGN2 PACSIN1 PARK2 PLXNB3 PSMD1 RIMS1 RIMS2 RUFY3 SPRED1 SPTBN1 SPTBN2 SPTBN4 SRCIN1 STMN1 TNIK TOP2B UBE4B USP9X                 | ABLIM2 ANK1 ARHGEF12 CAMK2B CAMSAP2 COL3A1 CTNNA1 CTTN DCLK1 DNM1 DPYSL2 DPYSL5 EGFR EP300 GIT1 GOLGA4 GPRIN1 GSK3A IMPACT KCNQ2 KIF13B MAGI2 MAP1B MAP2 MAP4 MINK1 NEFH PAK1 PLXNB3 PREX1 PSMD4 PTPRZ1 PVRL1 RAB3A RAPGEF2 ROBO2 RTN4 SHANK1 SHANK3 SPTBN2 SPTBN4 SRGAP2 STRN TIAM1 TOP2B UBE4B          |
| GO:0033043 | regulation of organelle organization           | 10.0000  | 10.0000        | ADD1 BAD CAMSAP2 CEP76 CORO1A CTNNB1 FEZ1 GSK3B HNRNPC HTT KMT2B LCP1 MAP1A MAP1B MAPT MTOR MTSS1 MYC MYO5A PARK2 PRKCE SIRT2 SPIRE1 SPTBN1 SPTBN2 SPTBN4 STMN1 TBC1D22B TOM1L2 UBQLN2 WBP11                                                           | ADD1 ADD2 AKT2 ANK1 ARFIP2 ARHGEF2 BCAS3 CAMK2B CAMSAP2 CDC26 CEP76 CORO1A CTTN DMTN EP300 FMN2 GSK3A HNRNPU HTT KMT2B MAP1A MAP1B MYC MYO5A PAK1 PHF8 PKIB PML PREX1 RAB3A RICTOR RPS3 SHANK1 SHANK3 SIRT2 SLC9A1 SPTBN2 SPTBN4 TOM1L2 TPR WIPF3 YWHAE                                                   |
| GO:0000904 | cell morphogenesis involved in differentiation | 10.0000  | 10.0000        | ABLIM2 ARHGAP35 ARHGEF12 BRSK1 CTNNB1 DCLK1 DOCK7 DPYSL3 FEZ1 FRMD6 GSK3B KIF13B MAP1B MAP2 MAPT PLXNB3 PSMD1 PXN RUFY3 SPRED1 SPTBN1 SPTBN2 SPTBN4 SRCIN1 STMN1 TMEM100 TNIK TOP2B TRIM28 TTC3 USP9X                                                  | ABLIM2 ANK1 ARHGEF12 CAMK2B COL18A1 COL3A1 CTTN DCLK1 DMTN DNM1 DPYSL2 DPYSL5 EGFR EP300 FRMD6 GIT1 GOLGA4 KCNQ2 KIF13B MAP1B MAP2 MINK1 NEFH PAK1 PLXNB3 PREX1 PSMD4 PTPRZ1 PVRL1 RAB3A RAPGEF2 ROBO2 RTN4 SHANK1 SHANK3 SOD1 SPTBN2 SPTBN4 SRGAP2 TGFB11 TIAM1 TOP2B                                    |

|            |                                                        |         |         |                                                                                                                                                                                                                                                                          |                                                                                                                                                                                                                                                                                                    |
|------------|--------------------------------------------------------|---------|---------|--------------------------------------------------------------------------------------------------------------------------------------------------------------------------------------------------------------------------------------------------------------------------|----------------------------------------------------------------------------------------------------------------------------------------------------------------------------------------------------------------------------------------------------------------------------------------------------|
| GO:0048812 | neuron projection morphogenesis                        | 10.0000 | 10.0000 | ABLIM2 ARHGAP35 ARHGEF12 BRSK1 DCLK1 DOCK7 DPYSL3 FEZ1 GSK3B KIF13B MAP1B MAP2 MAP4K4 MAPT PACSIN1 PARK2 PLXNB3 PSMD1 RIMS1 RIMS2 RUFY3 SPRED1 SPTBN1 SPTBN2 SPTBN4 SRCIN1 STMN1 TNIK TOP2B USP9X                                                                        | ABLIM2 ANK1 ARHGEF12 CAMK2B COL3A1 CTTN DCLK1 DNMI DPYSL2 DPYSL5 EGFR EP300 GIT1 GOLGA4 IMPACT KCNQ2 KIF13B MAP1B MAP2 MINK1 NEFH PAK1 PLXNB3 PSMD4 PTPRZ1 PVRL1 RAB3A RAPGEF2 ROBO2 RTN4 SHANK1 SHANK3 SPTBN2 SPTBN4 SRGAP2 TIAM1 TOP2B                                                           |
| GO:0051648 | vesicle localization                                   | 10.0000 | 10.0000 | AP3D1 ARFGAP1 CTNNB1 GBF1 HTT MYO5A NLGN2 PACSIN1 PARK2 PCLO RIMS1 RIMS2 SPTBN2 SYN1                                                                                                                                                                                     | AMPH AP3B2 CSNK1D DNMI DPYSL2 DYNC111 HTT MAGI2 MYO5A PCLO RAB3A RAP1B SEC16A SPTBN2 STX1B SYN1                                                                                                                                                                                                    |
| GO:0030029 | actin filament-based process                           | 10.0000 | 10.0000 | ABLIM2 ACTA1 ADD1 ARHGEF18 ATP1A1 CORO1A DPYSL3 DSG2 FRMD6 LCP1 LIMCH1 MTOR MTSS1 MYO5A NOS1AP PACSIN1 PARK2 PDPK1 PRKCE RUFY3 RYR2 SPIRE1 SPTBN1 SPTBN2 SPTBN4 TNIK                                                                                                     | ABLIM2 ADD1 ADD2 ARFIP2 ARHGEF2 BCAS3 CORO1A CTNNA1 CTTN DMTN DSG2 ELMO1 EP300 FMN2 FRMD6 MINK1 MYO5A PAK1 PDPK1 PREX1 RICTOR RYR2 SHANK1 SHANK3 SLC9A1 SPTBN2 SPTBN4 SRGAP2 STRIP1 WIPF3                                                                                                          |
| GO:0007010 | cytoskeleton organization                              | 10.0000 | 10.0000 | ABLIM2 ACTA1 ADD1 ARHGEF18 BRSK1 CAMSAP2 CEP76 CORO1A CSNK1A1 CTNNB1 DOCK7 DPYSL3 GSK3B HTT KIF2A LCP1 LIMCH1 MAP1A MAP1B MAP2 MAP7 MAP7D1 MAP7D2 MAPT MAST1 MTOR MTSS1 NLGN2 PACSIN1 PARK2 PCLO PDPK1 PRKCE PXN RUFY3 SIRT2 SPIRE1 SPTBN1 SPTBN2 SPTBN4 STMN1 TNIK TPPP | ABLIM2 ADD1 ADD2 ANK1 ARFIP2 ARHGEF2 BCAS3 BIRC7 CAMSAP2 CEP76 CORO1A CSNK1A1 CSNK1D CTNNA1 CTTN DMTN DPYSL2 ELMO1 EML1 EP300 FMN2 HTT KIF2A MAP1A MAP1B MAP2 MAP4 MINK1 NEFH PAK1 PCLO PDPK1 PREX1 RANBP10 RICTOR RPS3 SHANK1 SHANK3 SIRT2 SLC9A1 SOD1 SPTBN2 SPTBN4 SRGAP2 STRIP1 TLN2 TPR WIPF3 |
| GO:0007017 | microtubule-based process                              | 10.0000 | 10.0000 | AP3D1 ARHGAP21 BRSK1 CAMSAP2 CEP76 CTNNB1 DOCK7 GSK3B HTT KIF13B KIF2A MAP1A MAP1B MAP2 MAP7 MAP7D1 MAP7D2 MAPT SIRT2 SPIRE1 STMN1 TPPP                                                                                                                                  | AP3B2 APBA1 ARHGAP21 ARHGEF2 BCAS3 BIRC7 CAMSAP2 CEP76 CSNK1D DYNC111 EML1 FMN2 HTT KIF13B KIF17 KIF2A MAP1A MAP1B MAP2 MAP4 NEFH RANBP10 RPS3 SIRT2 SOD1 SRGAP2 TPR                                                                                                                               |
| GO:0032271 | regulation of protein polymerization                   | 10.0000 | 10.0000 | ADD1 CORO1A MAP1B MAPT MTOR PRKCE SPIRE1 SPTBN1 SPTBN2 SPTBN4 STMN1 TPPP                                                                                                                                                                                                 | ADD1 ADD2 ARFIP2 CORO1A CTTN DMTN FMN2 MAP1B PREX1 RICTOR RPS3 SPTBN2 SPTBN4 WIPF3                                                                                                                                                                                                                 |
| GO:0032990 | cell part morphogenesis                                | 10.0000 | 10.0000 | ABLIM2 ARHGAP35 ARHGEF12 ASAP1 BRSK1 DCLK1 DOCK7 DPYSL3 FEZ1 GSK3B HTT KIF13B MAP1B MAP2 MAP4K4 MAPT PACSIN1 PARK2 PLXNB3 PSMD1 RIMS1 RIMS2 RUFY3 SPRED1 SPTBN1 SPTBN2 SPTBN4 SRCIN1 STMN1 TBC1D22B TNIK TOP2B USP9X                                                     | ABLIM2 ANK1 ARHGEF12 CAMK2B COL3A1 CSNK1D CTTN DCLK1 DNMI DPYSL2 DPYSL5 EGFR EP300 GIT1 GOLGA4 HTT IMPACT KCNQ2 KIF13B MAP1B MAP2 MINK1 NEFH PAK1 PLEKHO1 PLXNB3 PSMD4 PTPRZ1 PVRL1 RAB3A RAPGEF2 ROBO2 RTN4 SHANK1 SHANK3 SPTBN2 SPTBN4 SRGAP2 TIAM1 TOP2B                                        |
| GO:0051656 | establishment of organelle localization                | 10.0000 | 10.0000 | AP3D1 ARFGAP1 ARHGAP21 CHMP6 CTNNB1 FEZ1 GBF1 HTT MAP1B MAPT MYO5A NLGN2 PACSIN1 PARK2 PCLO RIMS1 RIMS2 SPIRE1 SPTBN2 SYN1                                                                                                                                               | AMPH AP3B2 ARHGAP21 ARHGEF2 CSNK1D DNMI DPYSL2 DYNC111 FMN2 HTT MAP1B MAP4 MYO5A PCLO RAB3A RAP1B SEC16A SPTBN2 STX1B SYN1                                                                                                                                                                         |
| GO:0044087 | regulation of cellular component biogenesis            | 10.0000 | 10.0000 | ADD1 CEP76 CORO1A CTNNB1 DPYSL3 FEZ1 GSK3B HTT LCP1 MAP1B MAP3K7 MAPT MTOR MTSS1 NLGN2 PARK2 PLXNB3 PRKCE RIMS1 SACS SIRT2 SPIRE1 SPTBN1 SPTBN2 SPTBN4 STMN1 TAF1 TBC1D22B TPPP UBQLN2                                                                                   | ACE ADD1 ADD2 ARFIP2 BCAS3 CEP76 CORO1A CTTN DMTN EP300 FMN2 HTT IMPACT MAGI2 MAP1B MAP3K7 PAK1 PLXNB3 PREX1 PVRL1 RAP1B RAPGEF2 RICTOR ROBO2 RPS3 SHANK1 SHANK3 SIRT2 SLC9A1 SPTBN2 SPTBN4 STX1B TPR WIPF3                                                                                        |
| GO:0051129 | negative regulation of cellular component organization | 10.0000 | 10.0000 | ADD1 ASAP1 CORO1A CTNNB1 DPYSL3 FEZ1 GSK3B HNRNPC MAP1A MAP1B MAP3K7 MAP4K4 MTOR PACSIN1 PARK2 PLXNB3 RUFY3 SACS SIRT2 SPTBN1 SPTBN2 SPTBN4 STMN1 TOM1L2 TTC3 UBQLN2                                                                                                     | ACE ADD1 ADD2 ARHGEF2 BCAS3 CDC26 CORO1A DMTN GSK3A HNRNPU IMPACT MAP1A MAP1B MAP3K7 PHF8 PLXNB3 PML PTPRZ1 RAPGEF2 ROBO2 RTN4 SHANK1 SHANK3 SIRT2 SPTBN2 SPTBN4 TMBIM1 TOM1L2 TPR                                                                                                                 |

|            |                                                |         |         |                                                                                                                                                                              |                                                                                                                                                                                                        |
|------------|------------------------------------------------|---------|---------|------------------------------------------------------------------------------------------------------------------------------------------------------------------------------|--------------------------------------------------------------------------------------------------------------------------------------------------------------------------------------------------------|
| GO:0097479 | synaptic vesicle localization                  | 10.0000 | 10.0000 | AP3D1 CTNNB1 NLGN2 PACSIN1 PARK2 PCLO RIMS1 RIMS2 SPTBN2 SYN1                                                                                                                | AMPH AP3B2 DNM1 DPYSL2 MAGI2 PCLO RAB3A RAP1B SPTBN2 STX1B SYN1                                                                                                                                        |
| GO:0051650 | establishment of vesicle localization          | 10.0000 | 5.9775  | AP3D1 ARFGAP1 CTNNB1 GBF1 HTT MYO5A NLGN2 PACSIN1 PARK2 PCLO RIMS1 RIMS2 SPTBN2 SYN1                                                                                         | AMPH AP3B2 CSNK1D DNM1 DPYSL2 DYNC111 HTT MYO5A PCLO RAB3A RAP1B SEC16A SPTBN2 STX1B SYN1                                                                                                              |
| GO:0043254 | regulation of protein complex assembly         | 10.0000 | 5.8788  | ADD1 CORO1A CTNNB1 GSK3B LCP1 MAP1B MAP3K7 MAPT MTOR PRKCE RIMS1 SIRT2 SPIRE1 SPTBN1 SPTBN2 SPTBN4 STMN1 TAF1 TPPP                                                           | ADD1 ADD2 ARFIP2 CORO1A CTTN DMTN FMN2 IMPACT MAP1B MAP3K7 PREX1 RICTOR RPS3 SIRT2 SPTBN2 SPTBN4 STX1B TPR WIPF3                                                                                       |
| GO:0051258 | protein polymerization                         | 10.0000 | 5.8391  | ADD1 CORO1A MAP1B MAPT MTOR MTSS1 PARK2 PRKCE SPIRE1 SPTBN1 SPTBN2 SPTBN4 STMN1 TPPP                                                                                         | ADD1 ADD2 ARFIP2 CORO1A CSNK1D CTTN DMTN FMN2 MAP1B PREX1 RICTOR RPS3 SPTBN2 SPTBN4 WIPF3                                                                                                              |
| GO:0010256 | endomembrane system organization               | 5.5650  | 10.0000 | AP3D1 ARHGAP21 CSNK1A1 GBF1 HTT KCNIP4 KIAA1715 MAP7 MTSS1 MTSS1L MYO5A NDRG1 PACSIN1 PDPK1 SPTBN1 SPTBN4 TNIK TSC2 USP8                                                     | AKT2 ANK1 ARHGAP21 BCAS3 CSNK1A1 CSNK1D DNM1 GOLGA4 GPR158 HTT KCNIP4 MYO5A NUP85 PACS2 PDPK1 RANBP2 RAPGEF2 RTN3 RTN4 SEC16A SOD1 SPTBN4 TMBIM1 TPR TSC2                                              |
| GO:0050767 | regulation of neurogenesis                     | 10.0000 | 5.5304  | ARHGAP35 ASAP1 CTNNB1 DOCK7 DPYSL3 FEZ1 GSK3B KIF13B MAP1B MAP2 MAP4K4 MAPT MTOR MYC NDRG4 NLGN2 PACSIN1 PARK2 PLXNB3 RIMS1 RIMS2 RUFY3 SIRT2 SRCIN1 TNIK TTC3               | ACE ARHGEF2 CAMK2B COL3A1 CTNNA1 CTTN CX3CR1 DPYSL2 EP300 GOLGA4 GSK3A IMPACT KIF13B MAGI2 MAP1B MAP2 MYC PLXNB3 PREX1 PTPRZ1 RAPGEF2 ROBO2 RTN4 SHANK1 SHANK3 SIRT2 SRGAP2 TIAM1                      |
| GO:0048489 | synaptic vesicle transport                     | 10.0000 | 5.5182  | AP3D1 CTNNB1 NLGN2 PACSIN1 PARK2 PCLO RIMS1 RIMS2 SPTBN2 SYN1                                                                                                                | AMPH AP3B2 DNM1 DPYSL2 PCLO RAB3A RAP1B SPTBN2 STX1B SYN1                                                                                                                                              |
| GO:0097480 | establishment of synaptic vesicle localization | 10.0000 | 5.5182  | AP3D1 CTNNB1 NLGN2 PACSIN1 PARK2 PCLO RIMS1 RIMS2 SPTBN2 SYN1                                                                                                                | AMPH AP3B2 DNM1 DPYSL2 PCLO RAB3A RAP1B SPTBN2 STX1B SYN1                                                                                                                                              |
| GO:0030036 | actin cytoskeleton organization                | 5.4825  | 10.0000 | ABLIM2 ACTA1 ADD1 ARHGEF18 CORO1A DPYSL3 LCP1 LIMCH1 MTOR MTSS1 PACSIN1 PARK2 PDPK1 PRKCE RUFY3 SPIRE1 SPTBN1 SPTBN2 SPTBN4 TNIK                                             | ABLIM2 ADD1 ADD2 ARFIP2 ARHGEF2 BCAS3 CORO1A CTNNA1 CTTN DMTN ELMO1 EP300 FMN2 MINK1 PAK1 PDPK1 PREX1 RICTOR SHANK1 SHANK3 SLC9A1 SPTBN2 SPTBN4 STRIP1 WIPF3                                           |
| GO:0070848 | response to growth factor                      | 10.0000 | 5.4783  | ARHGEF12 ARHGEF18 BAD BYSL CORO1A CTNNB1 FEZ1 GSK3B HHIP HSPA5 MAP3K7 MCF2L MTOR MYC PDPK1 PRKAR1B PRKCE PSMD1 PXN RYR2 SIRT2 SPRED1 SPTBN1 SPTBN2 SPTBN4 TMEM100 TSC2 USP9X | ARHGEF12 ARHGEF2 CAMK2B CASK COL3A1 CORO1A CX3CR1 EGFR EP300 GSK3A HSPA5 KCNC1 MAGI2 MAP3K7 MYC PDPK1 PML PRKAR2A PSMD4 RAPGEF2 RICTOR RPS3 RTN4 RYR2 SIRT2 SPTBN2 SPTBN4 TGFB111 TIAM1 TPR TSC2 YWHAE |
| GO:0051960 | regulation of nervous system development       | 10.0000 | 5.4561  | ARHGAP35 ASAP1 CTNNB1 DOCK7 DPYSL3 FEZ1 GSK3B KIF13B MAP1B MAP2 MAP4K4 MAPT MTOR MYC NDRG4 NLGN2 PACSIN1 PARK2 PLXNB3 RIMS1 RIMS2 RUFY3 SIRT2 SRCIN1 TNIK TTC3               | ACE ARHGEF2 CAMK2B CEND1 COL3A1 CTNNA1 CTTN CX3CR1 DPYSL2 EP300 GOLGA4 GSK3A IMPACT KIF13B MAGI2 MAP1B MAP2 MYC PLXNB3 PREX1 PTPRZ1 PVRL1 RAPGEF2 ROBO2 RTN4 SHANK1 SHANK3 SIRT2 SRGAP2 TIAM1          |
| GO:0032970 | regulation of actin filament-based process     | 5.3892  | 10.0000 | ADD1 ATP1A1 CORO1A DSG2 FRMD6 MTOR MTSS1 NOS1AP PARK2 PRKCE RYR2 SPIRE1 SPTBN1 SPTBN2 SPTBN4                                                                                 | ADD1 ADD2 ARFIP2 BCAS3 CORO1A CTTN DMTN DSG2 EP300 FMN2 FRMD6 PAK1 PREX1 RICTOR RYR2 SHANK1 SHANK3 SLC9A1 SPTBN2 SPTBN4 WIPF3                                                                          |
| GO:0051493 | regulation of cytoskeleton organization        | 5.3753  | 10.0000 | ADD1 CEP76 CORO1A CTNNB1 MAP1A MAP1B MAPT MTOR MTSS1 PARK2 PRKCE SIRT2 SPIRE1 SPTBN1 SPTBN2 SPTBN4 STMN1                                                                     | ADD1 ADD2 ARFIP2 ARHGEF2 BCAS3 CEP76 CORO1A CTTN DMTN EP300 FMN2 MAP1A MAP1B PAK1 PREX1 RICTOR RPS3 SHANK1 SHANK3 SIRT2 SLC9A1 SPTBN2 SPTBN4 TPR WIPF3                                                 |

|            |                                                       |        |         |                                                                                                                                                                                                                  |                                                                                                                                                                                                                                                                                                               |
|------------|-------------------------------------------------------|--------|---------|------------------------------------------------------------------------------------------------------------------------------------------------------------------------------------------------------------------|---------------------------------------------------------------------------------------------------------------------------------------------------------------------------------------------------------------------------------------------------------------------------------------------------------------|
| GO:1902580 | single-organism cellular localization                 | 5.3144 | 10.0000 | AP3D1 ARFGAP1 ARHGAP21 BAD CHMP6 CLUH CTNNB1 GBF1 GSK3B HTT KCNIP4 MAP1B MAP7 MAPT MTOR MYO5A NLGN2 PACSIN1 PARK2 PCLO PDPK1 RIMS1 RIMS2 SPIRE1 SPTBN1 SPTBN2 SPTBN4 SYN1 TNIK TRIM28 TSC2 WBP11                 | AKAP1 AKT2 AMPH ANK1 AP3B2 ARHGAP21 ARHGEF2 CSNK1D DMTN DNM1 DPYSL2 DYNC111 EGFR EP300 FMN2 GOLGA4 GPR158 GSK3A HTT KCNIP4 LIME1 MAGI2 MAP1B MAP4 MYO5A NUP85 PACS2 PAK1 PCLO PDPK1 PEX19 PML RAB3A RANBP2 RAP1B RAPGEF2 RPS28 RPS3 SEC16A SHANK3 SLC9A1 SPTBN2 SPTBN4 STX1B SYN1 TIAM1 TMBIM1 TPR TSC2 YWHAE |
| GO:0048667 | cell morphogenesis involved in neuron differentiation | 5.1604 | 10.0000 | ABLIM2 ARHGAP35 ARHGEF12 BRSK1 DCLK1 DOCK7 DPYSL3 FEZ1 GSK3B KIF13B MAP1B MAP2 MAPT PLXNB3 PSMD1 RUFY3 SPRED1 SPTBN1 SPTBN2 SPTBN4 SRCIN1 STMN1 TNIK TOP2B USP9X                                                 | ABLIM2 ANK1 ARHGEF12 CAMK2B COL3A1 CTTN DCLK1 DNM1 DPYSL2 DPYSL5 EGFR EP300 GIT1 GOLGA4 KCNQ2 KIF13B MAP1B MAP2 MINK1 NEFH PAK1 PLXNB3 PSMD4 PTPRZ1 PVRL1 RAB3A RAPGEF2 ROBO2 RTN4 SHANK1 SHANK3 SOD1 SPTBN2 SPTBN4 SRGAP2 TIAM1 TOP2B                                                                        |
| GO:0016192 | vesicle-mediated transport                            | 5.0765 | 10.0000 | ADD1 AP3D1 ARFGAP1 ARHGAP21 ATP6V1H CHMP6 CORO1A CSNK1A1 CTAGE5 CTNNB1 EPN1 EPN2 GBF1 HSPA5 HTT MYO5A NDRG4 NLGN2 PACSIN1 PARK2 PCLO PDPK1 PRKCE RIMS1 RIMS2 SPIRE1 SPTBN1 SPTBN2 SPTBN4 SRCIN1 SYN1 TSC2 UBQLN2 | AAK1 ADD1 AKT2 AMPH ANK1 AP3B2 ARHGAP21 COL3A1 CORO1A CSNK1A1 CSNK1D CTAGE5 CTTN DMTN DNAJC6 DNM1 DPYSL2 ELMO1 ELMO3 EPN1 EPN2 FMN2 GAPVD1 GOLGA4 HSPA5 HTT KIF17 MAGI2 MYO5A NBAS PAK1 PCLO PDPK1 RAB11FIP5 RAB3A RAP1B RTN3 SEC16A SOD1 SPTBN2 SPTBN4 STX1B SYN1 TSC2 WIPF3                                 |
| GO:0007409 | axonogenesis                                          | 5.0243 | 10.0000 | ABLIM2 ARHGAP35 ARHGEF12 BRSK1 DCLK1 DOCK7 DPYSL3 FEZ1 GSK3B KIF13B MAP1B MAP2 MAPT PLXNB3 PSMD1 RUFY3 SPRED1 SPTBN1 SPTBN2 SPTBN4 STMN1 TOP2B USP9X                                                             | ABLIM2 ANK1 ARHGEF12 CAMK2B COL3A1 CTTN DCLK1 DNM1 DPYSL2 DPYSL5 EGFR EP300 GIT1 GOLGA4 KCNQ2 KIF13B MAP1B MAP2 NEFH PAK1 PLXNB3 PSMD4 PTPRZ1 PVRL1 RAB3A RAPGEF2 ROBO2 RTN4 SPTBN2 SPTBN4 SRGAP2 TIAM1 TOP2B                                                                                                 |
| GO:0007015 | actin filament organization                           | 5.5587 | 5.8542  | ACTA1 ADD1 CORO1A DPYSL3 LCP1 MTOR MTSS1 PACSIN1 PARK2 PRKCE RUFY3 SPIRE1 SPTBN1 SPTBN2 SPTBN4                                                                                                                   | ADD1 ADD2 ARFIP2 ARHGEF2 CORO1A CTNNA1 CTTN DMTN FMN2 PAK1 PREX1 RICTOR SHANK1 SHANK3 SLC9A1 SPTBN2 SPTBN4 WIPF3                                                                                                                                                                                              |
| GO:0022604 | regulation of cell morphogenesis                      | 5.6301 | 5.7622  | ARHGAP35 ARHGEF18 CORO1A CTNNB1 GSK3B HTT KIF13B MAP1B MAP2 MAPT PARK2 PLXNB3 PXN RIMS1 RIMS2 RUFY3 SRCIN1 TBC1D22B TNIK TTC3                                                                                    | CAMK2B CORO1A CTTN DMTN DPYSL2 EP300 GOLGA4 HTT KIF13B MAP1B MAP2 PALMD PLEKH01 PLXNB3 PREX1 PTPRZ1 RAPGEF2 ROBO2 RTN4 SHANK3 STRIP1 TGFB111 TIAM1 WIPF3                                                                                                                                                      |
| GO:0000226 | microtubule cytoskeleton organization                 | 5.9181 | 5.2405  | BRSK1 CAMSAP2 CEP76 CTNNB1 DOCK7 HTT KIF2A MAP1A MAP1B MAP2 MAP7 MAP7D1 MAP7D2 MAPT SIRT2 SPIRE1 STMN1 TPPP                                                                                                      | ARHGEF2 BCAS3 BIRC7 CAMSAP2 CEP76 CSNK1D EML1 FMN2 HTT KIF2A MAP1A MAP1B MAP2 MAP4 NEFH RANBP10 RPS3 SIRT2 SRGAP2 TPR                                                                                                                                                                                         |
| GO:0060284 | regulation of cell development                        | 5.6420 | 5.3831  | ARHGAP35 ASAP1 BAD CTNNB1 DOCK7 DPYSL3 FEZ1 GSK3B KIF13B MAP1B MAP2 MAP4K4 MAPT MTOR MYC NDRG4 NLGN2 PACSIN1 PARK2 PLXNB3 RIMS1 RIMS2 RUFY3 SIRT2 SRCIN1 TNIK TTC3                                               | ACE ARHGEF2 CAMK2B COL3A1 CTNNA1 CTTN CX3CR1 DMTN DPYSL2 EP300 GOLGA4 GSK3A IMPACT KIF13B MAGI2 MAP1B MAP2 MYC PLXNB3 PML PREX1 PTPRZ1 RAPGEF2 ROBO2 RTN4 SHANK1 SHANK3 SIRT2 SRGAP2 TGFB111 TIAM1 TJP2                                                                                                       |
| GO:0051494 | negative regulation of cytoskeleton organization      | 5.0452 | 5.6655  | ADD1 CORO1A MAP1A MAP1B PARK2 SPTBN1 SPTBN2 SPTBN4 STMN1                                                                                                                                                         | ADD1 ADD2 ARHGEF2 CORO1A DMTN MAP1A MAP1B SHANK1 SHANK3 SPTBN2 SPTBN4                                                                                                                                                                                                                                         |
| GO:0060341 | regulation of cellular localization                   | 5.0510 | 5.3711  | BAD CACNA1E CHMP6 CORO1A CTNNB1 GBF1 GSK3B HTT LCP1 MAP1B MAP4K4 MAPT MTOR MYO5A NCBP2 NDRG4 NLGN2 PARK2 PCLO PDPK1 PRKAR1B PRKCE RIMS1 RIMS2 RUFY3 RYR2 SIRT2 SPTBN1 SRCIN1 SYN1 TRIM28 WBP11                   | AKAP1 AKT2 BCAS3 C2CD2L CORO1A DBI DMTN DNM1 DPYSL2 EGFR EP300 GSK3A HTT KCNC3 LIME1 MADD MAGI2 MAP1B MYO5A NEFH OXCT1 PCLO PDPK1 PML PRKAR2A RAB11FIP5 RAB3A RAP1B RTN4 RYR2 SHANK3 SIRT2 SLC9A1 SP100 STX1B SYN1 TIAM1 TMBIM1 TPR YWHAE                                                                     |

|            |                                                     |         |         |                                                                                                                                                                              |                                                                                                                                                                                                                                                      |
|------------|-----------------------------------------------------|---------|---------|------------------------------------------------------------------------------------------------------------------------------------------------------------------------------|------------------------------------------------------------------------------------------------------------------------------------------------------------------------------------------------------------------------------------------------------|
| GO:0010720 | positive regulation of cell development             | 5.3194  | 5.0207  | ARHGAP35 BAD CTNNB1 DPYSL3 FEZ1 GSK3B MAP1B MAPT MTOR MYC NDRG4 NLGN2 PACSIN1 PARK2 PLXNB3 RIMS1 RIMS2 RUFY3 SIRT2                                                           | ACE CAMK2B CX3CR1 DMTN EP300 GOLGA4 IMPACT MAGI2 MAP1B MYC PLXNB3 PML PREX1 PTPRZ1 RAPGEF2 ROBO2 RTN4 SHANK1 SHANK3 SIRT2 TGFB11 TIAM1                                                                                                               |
| GO:0071363 | cellular response to growth factor stimulus         | 10.0000 |         | ARHGEF12 ARHGEF18 BAD BYSL CORO1A CTNNB1 FEZ1 GSK3B HHIP HSPA5 MAP3K7 MCF2L MTOR MYC PDPK1 PRKAR1B PRKCE PSMD1 PXN RYR2 SIRT2 SPRED1 SPTBN1 SPTBN2 SPTBN4 TMEM100 TSC2 USP9X |                                                                                                                                                                                                                                                      |
| GO:0007268 | synaptic transmission                               |         | 10.0000 |                                                                                                                                                                              | AMPH APBA1 BSN CAMK2B CASK CX3CR1 DBI DNM1 DTNA EGFR GABBR2 HCN2 HTT KCNC1 KCNC3 KCNQ2 MINK1 MYO5A PAK1 PCLO PDPK1 RAB3A RAP1B RAPGEF2 SHANK1 SHANK3 SHISA6 SLC1A4 SLC6A5 SPTBN2 STX1B SYN1                                                          |
| GO:0044802 | single-organism membrane organization               |         | 10.0000 |                                                                                                                                                                              | AKT2 ANK1 CORO1A CSNK1D DMTN EGFR GOLGA4 GPR158 GSK3A HTT KCNIP4 MAGI2 MYC MYO5A NUP85 PACS2 PAK1 PDPK1 PEX19 RAB3A RANBP2 RAPGEF2 RPS28 RPS3 SEC16A SHANK3 SLC25A46 SLC9A1 SOD1 SPTBN4 STX1B TIAM1 TMBIM1 TPR TSC2 YWHAE                            |
| GO:0031346 | positive regulation of cell projection organization | 10.0000 |         | ARHGAP35 DPYSL3 FEZ1 GSK3B HTT MAP1B MAPT MTOR NDRG4 NLGN2 PACSIN1 PARK2 PLXNB3 RIMS1 RIMS2 RUFY3                                                                            |                                                                                                                                                                                                                                                      |
| GO:0007264 | small GTPase mediated signal transduction           |         | 10.0000 |                                                                                                                                                                              | ARFGEF3 ARFIP2 ARHGAP5 ARHGEF12 ARHGEF2 ARHGEF33 CAMK2B COL3A1 CTNNA1 CTTN EGFR ELMO1 KIF2A MADD NUP85 PAK1 PDPK1 PPP1R14A PREX1 PSMD4 RAB12 RAB3A RALGPS1 RANBP2 RAP1B RAPGEF2 RGL3 SIPA1L2 SPTBN2 SPTBN4 SRGAP2 TIAM1 TSC2 WIPF3 YWHAE             |
| GO:1901701 | cellular response to oxygen-containing compound     |         | 10.0000 |                                                                                                                                                                              | ADD1 AKAP1 AKT2 ARHGEF2 ATP6V0A2 C2CD2L CAMK2B COL3A1 CTNNA1 CX3CR1 DMTN EGFR EIF4B EP300 GSK3A HCN2 HNRNPU IMPACT MYO5A NEFH OXCT1 PAK1 PDPK1 PRKAR2A PSMD4 RAB11FIP5 RAP1B RAPGEF2 RPS3 RYR2 SASH1 SIRT2 SLC9A1 SOD1 SPTBN2 SPTBN4 TIAM1 TSC2 YBX1 |
| GO:0032535 | regulation of cellular component size               |         | 10.0000 |                                                                                                                                                                              | ADD1 ADD2 ARFIP2 ARHGAP5 CLNS1A CORO1A CTTN DMTN DPYSL2 EP300 FMN2 GOLGA4 MAP1B PREX1 RICTOR RTN4 SHANK3 SPTBN2 SPTBN4 TSC2 WIPF3                                                                                                                    |
| GO:0061024 | membrane organization                               |         | 10.0000 |                                                                                                                                                                              | AKT2 ANK1 CORO1A CSNK1D CTAGE5 DMTN DNAJC6 EGFR ELMO1 GOLGA4 GPR158 GSK3A HTT KCNIP4 MAGI2 MYC MYO5A NUP85 PACS2 PAK1 PDPK1 PEX19 RAB3A RANBP2 RAPGEF2 RPS28 RPS3 SEC16A SHANK3 SLC25A46 SLC9A1 SOD1 SPTBN4 STX1B TIAM1 TMBIM1 TPR TSC2 YWHAE        |
| GO:0030833 | regulation of actin filament polymerization         |         | 10.0000 |                                                                                                                                                                              | ADD1 ADD2 ARFIP2 CORO1A CTTN DMTN FMN2 PREX1 RICTOR SPTBN2 SPTBN4 WIPF3                                                                                                                                                                              |



|            |                                                      |         |         |                                                                                                                                         |                                                                                                                                                                                                                                                                                  |
|------------|------------------------------------------------------|---------|---------|-----------------------------------------------------------------------------------------------------------------------------------------|----------------------------------------------------------------------------------------------------------------------------------------------------------------------------------------------------------------------------------------------------------------------------------|
| GO:0061564 | axon development                                     |         | 10.0000 |                                                                                                                                         | ABLIM2 ANK1 ARHGEF12 CAMK2B COL3A1 CTNNA1 CTTN DCLK1 DNM1 DPYSL2 DPYSL5 EGFR EP300 GIT1 GOLGA4 KCNQ2 KIF13B MAP1B MAP2 NEFH PAK1 PLXNB3 PSMD4 PTPRZ1 PVRL1 RAB3A RAPGEF2 ROBO2 RTN4 SPTBN2 SPTBN4 SRGAP2 TIAM1 TOP2B                                                             |
| GO:0051336 | regulation of hydrolase activity                     |         | 10.0000 |                                                                                                                                         | AKT2 AMPH ARFGEF3 ARHGAP21 ARHGAP5 ARHGEF12 ARHGEF2 ARHGEF33 BCAS3 BIRC7 CAMK2B DAP EGFR EP300 GAPVD1 GIT1 HNRNPU HSPA5 HTT LMTK3 MADD MAGI2 MYC PCP2 PDPK1 PKP4 PLXNB3 PML PREX1 PRKAR2A RAB3A RALGPS1 RAPGEF2 RGL3 RICTOR RPS3 RYR2 SIPA1L2 SMAP2 SOD1 SRGAP2 TIAM1 TSC2 YWHAE |
| GO:0010976 | positive regulation of neuron projection development | 10.0000 |         | ARHGAP35 DPYSL3 FEZ1 GSK3B MAP1B MAPT MTOR NDRG4 NLGN2 PACSIN1 PARK2 PLXNB3 RIMS1 RIMS2 RUFY3                                           |                                                                                                                                                                                                                                                                                  |
| GO:0051345 | positive regulation of hydrolase activity            |         | 10.0000 |                                                                                                                                         | AKT2 AMPH ARFGEF3 ARHGAP21 ARHGAP5 ARHGEF12 ARHGEF2 ARHGEF33 BCAS3 CAMK2B DAP EGFR GAPVD1 GIT1 HNRNPU HSPA5 MADD MAGI2 MYC PCP2 PDPK1 PKP4 PML PREX1 PRKAR2A RAB3A RALGPS1 RAPGEF2 RGL3 RPS3 RYR2 SIPA1L2 SMAP2 SRGAP2 TIAM1 TSC2                                                |
| GO:0090066 | regulation of anatomical structure size              |         | 10.0000 |                                                                                                                                         | ACE ADD1 ADD2 ARFIP2 ARHGAP5 CLNS1A CORO1A CTTN DMTN DPYSL2 EGFR EP300 FMN2 GOLGA4 MAP1B PREX1 RICTOR RTN4 SHANK3 SOD1 SPTBN2 SPTBN4 TSC2 WIPF3                                                                                                                                  |
| GO:0060322 | head development                                     |         | 10.0000 |                                                                                                                                         | ARID1A CEND1 CKB COL3A1 CX3CR1 DBI DCLK1 DPYSL2 EGFR EML1 HSPA5 HTT KCNC1 NEFH NFIX OXCT1 PAK1 PHF8 RAPGEF2 ROBO2 RPH3A RTN4 SEC16A SHANK3 SIRT2 SPTBN2 SRGAP2 TOP2B YWHAE                                                                                                       |
| GO:0045664 | regulation of neuron differentiation                 | 10.0000 |         | ARHGAP35 ASAP1 DPYSL3 FEZ1 GSK3B KIF13B MAP1B MAP2 MAP4K4 MAPT MTOR NDRG4 NLGN2 PACSIN1 PARK2 PLXNB3 RIMS1 RIMS2 RUFY3 SRCIN1 TNIK TTC3 |                                                                                                                                                                                                                                                                                  |
| GO:0071407 | cellular response to organic cyclic compound         |         | 10.0000 |                                                                                                                                         | AKAP1 AKT2 ATP1A3 BCAS3 CTNNA1 DMTN EGFR EP300 GSK3A HCN2 HNRNPU IMPACT NEFH PAK1 RAP1B RAPGEF2 RYR2 SFR1 SIRT2 SLC9A1 SOD1                                                                                                                                                      |
| GO:1901699 | cellular response to nitrogen compound               |         | 10.0000 |                                                                                                                                         | AKAP1 AKT2 ARHGEF2 ATP6V0A2 CAMK2B COL3A1 CTNNA1 DMTN EGFR EIF4B EP300 GSK3A HCN2 IMPACT MYO5A PAK1 PDPK1 PRKAR2A PSMD4 RAP1B RAPGEF2 RYR2 SIRT2 SLC9A1 SOD1 SPTBN2 SPTBN4 TSC2 YBX1                                                                                             |
| GO:0010243 | response to organonitrogen compound                  |         | 10.0000 |                                                                                                                                         | AKAP1 AKT2 ARHGEF2 ATP6V0A2 CAMK2B COL3A1 CTNNA1 DMTN DPYSL2 EGFR EIF4B EP300 GSK3A HCN2 IMPACT KCNC1 MYC MYO5A NEFH PAK1 PDPK1 PRKAR2A PSMD4 RANBP2 RAP1B RAPGEF2 RYR2 SCAP SIRT2 SLC9A1 SOD1 SPTBN2 SPTBN4 TSC2 YBX1                                                           |

|            |                                               |         |         |                                                                                                                                                 |                                                                                                                                                                                                                                                                                       |
|------------|-----------------------------------------------|---------|---------|-------------------------------------------------------------------------------------------------------------------------------------------------|---------------------------------------------------------------------------------------------------------------------------------------------------------------------------------------------------------------------------------------------------------------------------------------|
| GO:0043547 | positive regulation of GTPase activity        |         | 10.0000 |                                                                                                                                                 | AKT2 AMPH ARFGEF3 ARHGAP21 ARHGAP5 ARHGEF12 ARHGEF2 ARHGEF33 BCAS3 GAPVD1 GIT1 MADD PCP2 PKP4 PREX1 RALGPS1 RAPGEF2 RGL3 SIPA1L2 SMAP2 SRGAP2 TIAM1 TSC2                                                                                                                              |
| GO:0016358 | dendrite development                          |         | 10.0000 |                                                                                                                                                 | CAMK2B DCLK1 GIT1 GSK3A MAP1B MAP2 MINK1 PAK1 PREX1 PTPRZ1 RAPGEF2 SHANK1 SHANK3 SRGAP2 STRN TIAM1                                                                                                                                                                                    |
| GO:0071417 | cellular response to organonitrogen compound  |         | 10.0000 |                                                                                                                                                 | AKAP1 AKT2 ARHGEF2 ATP6V0A2 CAMK2B COL3A1 CTNNA1 DMTN EGFR EIF4B EP300 GSK3A HCN2 IMPACT MYO5A PAK1 PDPK1 PRKAR2A PSMD4 RAP1B RAPGEF2 RYR2 SIRT2 SLC9A1 SOD1 SPTBN2 SPTBN4 TSC2 YBX1                                                                                                  |
| GO:0071495 | cellular response to endogenous stimulus      |         | 10.0000 |                                                                                                                                                 | AKAP1 AKT2 ARHGEF2 ATP1A3 ATP6V0A2 BCAS3 CAMK2B COL3A1 CORO1A CTNNA1 CX3CR1 DMTN EGFR EIF4B EP300 GSK3A HCN2 HNRNPU HSPA5 IMPACT MAGI2 MAP3K7 MYC MYO5A NEFH PAK1 PDPK1 PML PRKAR2A PSMD4 RAP1B RAPGEF2 RICTOR ROBO2 RPS3 RYR2 SFR1 SIRT2 SLC9A1 SOD1 SPTBN2 SPTBN4 TGFB111 TSC2 YBX1 |
| GO:0031344 | regulation of cell projection organization    | 10.0000 |         | ARHGAP35 ASAP1 DPYSL3 FEZ1 GSK3B HTT KIF13B MAP1B MAP2 MAP4K4 MAPT MTOR NDRG4 NLGN2 PACSIN1 PARK2 PLXNB3 RIMS1 RIMS2 RUFY3 SRCIN1 TBC1D22B TNIK |                                                                                                                                                                                                                                                                                       |
| GO:0010975 | regulation of neuron projection development   | 10.0000 |         | ARHGAP35 ASAP1 DPYSL3 FEZ1 GSK3B KIF13B MAP1B MAP2 MAP4K4 MAPT MTOR NDRG4 NLGN2 PACSIN1 PARK2 PLXNB3 RIMS1 RIMS2 RUFY3 SRCIN1 TNIK              |                                                                                                                                                                                                                                                                                       |
| GO:0042391 | regulation of membrane potential              | 10.0000 |         | ATP1A1 ATP1A3 BAD CACNA1E DSG2 GCLM GSK3B HTT MYC NLGN2 NOS1AP PARK2 PRKCE RIMS1 RIMS2 RYR2 SCN11A SCN2A                                        |                                                                                                                                                                                                                                                                                       |
| GO:0032956 | regulation of actin cytoskeleton organization |         | 10.0000 |                                                                                                                                                 | ADD1 ADD2 ARFIP2 BCAS3 CORO1A CTTN DMTN EP300 FMN2 PAK1 PREX1 RICTOR SHANK1 SHANK3 SLC9A1 SPTBN2 SPTBN4 WIPF3                                                                                                                                                                         |
| GO:0007420 | brain development                             |         | 10.0000 |                                                                                                                                                 | ARID1A CEND1 CKB COL3A1 CX3CR1 DBI DCLK1 DPYSL2 EGFR EML1 HSPA5 HTT KCNC1 NEFH NFIX OXCT1 PAK1 PHF8 RAPGEF2 ROBO2 RPH3A RTN4 SEC16A SHANK3 SIRT2 SPTBN2 SRGAP2 TOP2B YWHAE                                                                                                            |
| GO:0043087 | regulation of GTPase activity                 |         | 10.0000 |                                                                                                                                                 | AKT2 AMPH ARFGEF3 ARHGAP21 ARHGAP5 ARHGEF12 ARHGEF2 ARHGEF33 BCAS3 GAPVD1 GIT1 MADD PCP2 PKP4 PLXNB3 PREX1 RALGPS1 RAPGEF2 RGL3 RICTOR SIPA1L2 SMAP2 SOD1 SRGAP2 TIAM1 TSC2                                                                                                           |
| GO:0016477 | cell migration                                |         | 5.8924  |                                                                                                                                                 | ACE AKT2 ARHGAP5 ASTN1 BCAS3 CEND1 COL18A1 COL3A1 CORO1A CTTN CX3CR1 DCLK1 DMTN EGFR ELMO1 ELMO3 GSK3A HSPA5 MAGI2 MINK1 MYC NUP85 PAK1 PDPK1 PLEKHO1 PLXNB3 PML PREX1 PTPRZ1 RAPGEF2 RTN4 SASH1 SLC7A5 SLC9A1 SP100 SRGAP2 TIAM1 TNS1 TOP2B YWHAE                                    |

|            |                                                 |        |        |                                                                                                                    |                                                                                                                                                                                                                                                                                        |
|------------|-------------------------------------------------|--------|--------|--------------------------------------------------------------------------------------------------------------------|----------------------------------------------------------------------------------------------------------------------------------------------------------------------------------------------------------------------------------------------------------------------------------------|
| GO:0031334 | positive regulation of protein complex assembly | 5.7721 |        | CORO1A CTNNB1 GSK3B LCP1 MAP1B<br>MAPT MTOR PRKCE RIMS1 SPIRE1 TAF1<br>TPPP                                        |                                                                                                                                                                                                                                                                                        |
| GO:0048870 | cell motility                                   |        | 5.7623 |                                                                                                                    | ACE AKT2 ARHGAP5 ASTN1 BCAS3<br>CEND1 COL18A1 COL3A1 CORO1A<br>CTNNA1 CTTN CX3CR1 DCLK1 DMTN<br>EGFR ELMO1 ELMO3 GSK3A HSPA5<br>LDHC MAGI2 MINK1 MYC NUP85 PAK1<br>PDPK1 PLEKHO1 PLXNB3 PML PREX1<br>PTPRZ1 RAPGEF2 RTN4 SASH1 SLC7A5<br>SLC9A1 SP100 SRGAP2 TIAM1 TNS1<br>TOP2B YWHAE |
| GO:0051674 | localization of cell                            |        | 5.7623 |                                                                                                                    | ACE AKT2 ARHGAP5 ASTN1 BCAS3<br>CEND1 COL18A1 COL3A1 CORO1A<br>CTNNA1 CTTN CX3CR1 DCLK1 DMTN<br>EGFR ELMO1 ELMO3 GSK3A HSPA5<br>LDHC MAGI2 MINK1 MYC NUP85 PAK1<br>PDPK1 PLEKHO1 PLXNB3 PML PREX1<br>PTPRZ1 RAPGEF2 RTN4 SASH1 SLC7A5<br>SLC9A1 SP100 SRGAP2 TIAM1 TNS1<br>TOP2B YWHAE |
| GO:0007267 | cell-cell signaling                             |        | 5.6590 |                                                                                                                    | AMPH APBA1 BSN C2CD2L CAMK2B<br>CASK CX3CR1 DBI DNMI1 DTNA EGFR<br>GABBR2 HCN2 HTT KCNC1 KCNC3<br>KCNQ2 MADD MINK1 MYO5A OXCT1<br>PAK1 PCLO PDPK1 PKP4 PRKAR2A<br>RAB11FIP5 RAB3A RAP1B RAPGEF2<br>RZR2 SHANK1 SHANK3 SHISA6 SLC1A4<br>SLC6A5 SPTBN2 STX1B SYN1 TIAM1                  |
| GO:0008542 | visual learning                                 | 5.6364 |        | ATP1A3 CACNA1E HTT MTOR NDRG4<br>PPP1R1B TANC1                                                                     |                                                                                                                                                                                                                                                                                        |
| GO:0051881 | regulation of mitochondrial membrane potential  | 5.5854 |        | BAD GCLM GSK3B HTT MYC PARK2<br>PRKCE                                                                              |                                                                                                                                                                                                                                                                                        |
| GO:0072657 | protein localization to membrane                |        | 5.5726 |                                                                                                                    | AKT2 ANK1 DMTN EGFR GOLGA4<br>GPR158 KCNIP4 MAGI2 MYO5A PACS2<br>PAK1 PDPK1 PEX19 RAPGEF2 RPS28<br>RPS3 SHANK3 SPTBN4 TIAM1 TMBIM1<br>TSC2 YWHAE                                                                                                                                       |
| GO:1901698 | response to nitrogen compound                   |        | 5.5451 |                                                                                                                    | AKAP1 AKT2 ARHGAP5 ATP6V0A2<br>CAMK2B COL3A1 CTNNA1 DMTN DPYSL2<br>EGFR EIF4B EP300 GSK3A HCN2 IMPACT<br>KCNC1 MYC MYO5A NEFH PAK1 PDPK1<br>PRKAR2A PSMD4 RANBP2 RAP1B<br>RAPGEF2 RZR2 SCAP SIRT2 SLC9A1<br>SOD1 SPTBN2 SPTBN4 TSC2 YBX1                                               |
| GO:0030041 | actin filament polymerization                   |        | 5.5179 |                                                                                                                    | ADD1 ADD2 ARFIP2 CORO1A CTTN<br>DMTN FMN2 PREX1 RICTOR SPTBN2<br>SPTBN4 WIPF3                                                                                                                                                                                                          |
| GO:0060627 | regulation of vesicle-mediated transport        | 5.5075 |        | ADD1 ARFGAP1 ARHGAP21 CHMP6<br>CORO1A EPN2 MYO5A NDRG4 PACSIN1<br>PARK2 PCLO PDPK1 RIMS1 RIMS2 SYN1<br>TSC2 UBQLN2 |                                                                                                                                                                                                                                                                                        |
| GO:0018105 | peptidyl-serine phosphorylation                 | 5.4637 |        | BRSK1 CNKSR3 CSNK1A1 DOCK7<br>DYRK1A GSK3B MAST1 MTOR PDPK1<br>PLCL1 PRKCE SPTBN4 TAF1                             |                                                                                                                                                                                                                                                                                        |
| GO:0080135 | regulation of cellular response to stress       |        | 5.4451 |                                                                                                                    | ARHGAP5 BIRC7 CAMK2B CTTN EGFR<br>EP300 GSK3A HSPA5 IMPACT MAP3K7<br>MINK1 MYC NUP85 PAK1 PML PTGES3<br>RAB12 RANBP2 RPS3 RTN4 SASH1 SOD1<br>TIAM1 TPR TSC2 YWHAE                                                                                                                      |

|            |                                                              |        |        |                                                                                                                                                                                                        |                                                                                                                                                                                               |
|------------|--------------------------------------------------------------|--------|--------|--------------------------------------------------------------------------------------------------------------------------------------------------------------------------------------------------------|-----------------------------------------------------------------------------------------------------------------------------------------------------------------------------------------------|
| GO:0008064 | regulation of actin polymerization or depolymerization       |        | 5.4349 |                                                                                                                                                                                                        | ADD1 ADD2 ARFIP2 CORO1A CTTN DMTN FMN2 PREX1 RICTOR SPTBN2 SPTBN4 WIPF3                                                                                                                       |
| GO:0007167 | enzyme linked receptor protein signaling pathway             | 5.4261 |        | ANKS1A ARHGEF12 ARHGEF18 ATP6V1H BAD CTNNB1 DOK1 EIF4B EPN1 GSK3B HHIP HSPA5 MAP3K7 MCF2L MTOR MTSS1 MYC NDRG4 PDPK1 PRKAR1B PRKCE PSMD1 PXN RYR2 SIRT2 SPRED1 SPTBN1 SPTBN2 SPTBN4 TMEM100 TSC2 USP9X |                                                                                                                                                                                               |
| GO:0030832 | regulation of actin filament length                          |        | 5.4077 |                                                                                                                                                                                                        | ADD1 ADD2 ARFIP2 CORO1A CTTN DMTN FMN2 PREX1 RICTOR SPTBN2 SPTBN4 WIPF3                                                                                                                       |
| GO:0007632 | visual behavior                                              | 5.3906 |        | ATP1A3 CACNA1E HTT MTOR NDRG4 PPP1R1B TANC1                                                                                                                                                            |                                                                                                                                                                                               |
| GO:0010769 | regulation of cell morphogenesis involved in differentiation |        | 5.3843 |                                                                                                                                                                                                        | CAMK2B CTTN DMTN DPYSL2 EP300 GOLGA4 KIF13B MAP1B MAP2 PLXNB3 PREX1 PTPRZ1 RAPGEF2 ROBO2 RTN4 SHANK3 TGFB11 TIAM1                                                                             |
| GO:0050769 | positive regulation of neurogenesis                          | 5.3753 |        | ARHGAP35 CTNNB1 DPYSL3 FEZ1 GSK3B MAP1B MAPT MTOR MYC NDRG4 NLGN2 PACSIN1 PARK2 PLXNB3 RIMS1 RIMS2 RUFY3                                                                                               |                                                                                                                                                                                               |
| GO:0007417 | central nervous system development                           |        | 5.3643 |                                                                                                                                                                                                        | ARID1A CEND1 CKB COL3A1 CX3CR1 DBI DCLK1 DPYSL2 EGFR EML1 HSPA5 HTT KCNC1 MAP2 NEFH NFIX OXCT1 PAK1 PHF8 PTPRZ1 RAPGEF2 ROBO2 RPH3A RTN4 SEC16A SHANK3 SIRT2 SPTBN2 SPTBN4 SRGAP2 TOP2B YWHAE |
| GO:1990089 | response to nerve growth factor                              |        | 5.3277 |                                                                                                                                                                                                        | CORO1A EP300 KCNC1 MAGI2 RAPGEF2 RPS3                                                                                                                                                         |
| GO:0034330 | cell junction organization                                   |        | 5.3070 |                                                                                                                                                                                                        | ACE BCAS3 CTNNA1 CTTN DMTN DSG2 PDPK1 PKP4 PVRL1 RAP1B RAPGEF2 SLC9A1 STRN TLN2 TNS1                                                                                                          |
| GO:0043269 | regulation of ion transport                                  |        | 5.2864 |                                                                                                                                                                                                        | ACE AKT2 CAMK2B CASK CORO1A DBI DPYSL2 HCN2 HTT KCNC1 KCNC3 KCNIP4 KCNQ2 LIME1 MINK1 MYO5A PDPK1 PML RTN4 RYR2 SHANK1 SHANK3 SLC9A1 SPTBN4 YWHAE                                              |
| GO:0045666 | positive regulation of neuron differentiation                | 5.2848 |        | ARHGAP35 DPYSL3 FEZ1 GSK3B MAP1B MAPT MTOR NDRG4 NLGN2 PACSIN1 PARK2 PLXNB3 RIMS1 RIMS2 RUFY3                                                                                                          |                                                                                                                                                                                               |
| GO:0051130 | positive regulation of cellular component organization       | 5.2510 |        | ADD1 ARHGAP35 BAD CORO1A CTNNB1 DPYSL3 FEZ1 GSK3B HTT LCP1 MAP1B MAPT MTOR MTSS1 NDRG4 NLGN2 PACSIN1 PARK2 PDPK1 PLXNB3 PRKCE RIMS1 RIMS2 RUFY3 SIRT2 SPIRE1 SPTBN1 TAF1 TPPP WBP11                    |                                                                                                                                                                                               |
| GO:0034329 | cell junction assembly                                       |        | 5.2460 |                                                                                                                                                                                                        | ACE BCAS3 CTNNA1 CTTN DMTN PDPK1 PKP4 PVRL1 RAP1B RAPGEF2 SLC9A1 STRN TLN2 TNS1                                                                                                               |
| GO:1901880 | negative regulation of protein depolymerization              |        | 5.2333 |                                                                                                                                                                                                        | ADD1 ADD2 ARHGEF2 DMTN MAP1A MAP1B SPTBN2 SPTBN4                                                                                                                                              |

|            |                                                                  |        |        |                                                                                                                                                                    |                                                                                                                                                                                                       |
|------------|------------------------------------------------------------------|--------|--------|--------------------------------------------------------------------------------------------------------------------------------------------------------------------|-------------------------------------------------------------------------------------------------------------------------------------------------------------------------------------------------------|
| GO:0038179 | neurotrophin signaling pathway                                   | 5.2198 |        | ARHGEF12 ARHGEF18 BAD CORO1A GSK3B MCF2L MTOR PDPK1 PRKAR1B PRKCE PSMD1 SPRED1 SPTBN1 SPTBN2 SPTBN4 TSC2                                                           |                                                                                                                                                                                                       |
| GO:0008543 | fibroblast growth factor receptor signaling pathway              | 5.2141 |        | BAD CTNNB1 GSK3B HHIP MTOR PDPK1 PRKAR1B PRKCE PSMD1 SPRED1 SPTBN1 SPTBN2 SPTBN4 TSC2                                                                              |                                                                                                                                                                                                       |
| GO:0018209 | peptidyl-serine modification                                     | 5.1976 |        | BRSK1 CNKSR3 CSNK1A1 DOCK7 DYRK1A GSK3B MAST1 MTOR PDPK1 PLCL1 PRKCE SPTBN4 TAF1                                                                                   |                                                                                                                                                                                                       |
| GO:0010639 | negative regulation of organelle organization                    |        | 5.1770 |                                                                                                                                                                    | ADD1 ADD2 ARHGEF2 CDC26 CORO1A DMTN HNRNPU MAP1A MAP1B PHF8 PML SHANK1 SHANK3 SPTBN2 SPTBN4 TOM1L2 TPR                                                                                                |
| GO:0007169 | transmembrane receptor protein tyrosine kinase signaling pathway | 5.1123 |        | ANKS1A ARHGEF12 ARHGEF18 ATP6V1H BAD CTNNB1 DOK1 EIF4B EPN1 GSK3B HHIP MCF2L MTOR MTSS1 NDRG4 PDPK1 PRKAR1B PRKCE PSMD1 PXN SIRT2 SPRED1 SPTBN1 SPTBN2 SPTBN4 TSC2 |                                                                                                                                                                                                       |
| GO:0043242 | negative regulation of protein complex disassembly               |        | 5.0955 |                                                                                                                                                                    | ADD1 ADD2 ARHGEF2 DMTN MAP1A MAP1B SPTBN2 SPTBN4                                                                                                                                                      |
| GO:0044089 | positive regulation of cellular component biogenesis             | 5.0875 |        | CORO1A CTNNB1 DPYSL3 GSK3B HTT LCP1 MAP1B MAPT MTOR MTSS1 NLGN2 PRKCE RIMS1 SPIRE1 TAF1 TPPP                                                                       |                                                                                                                                                                                                       |
| GO:0030705 | cytoskeleton-dependent intracellular transport                   |        | 5.0461 |                                                                                                                                                                    | AP3B2 APBA1 ARHGAP21 DYNC111 HTT KIF13B KIF17 MAP1B NEFH SOD1                                                                                                                                         |
| GO:0030900 | forebrain development                                            |        | 4.9895 |                                                                                                                                                                    | ARID1A COL3A1 CX3CR1 DBI DCLK1 DPYSL2 EGFR HTT KCNC1 NEFH PAK1 RAPGEF2 ROBO2 RTN4 SHANK3 SRGAP2 TOP2B YWHAE                                                                                           |
| GO:0010918 | positive regulation of mitochondrial membrane potential          | 4.9586 |        | BAD GSK3B MYC                                                                                                                                                      |                                                                                                                                                                                                       |
| GO:0043244 | regulation of protein complex disassembly                        |        | 4.9531 |                                                                                                                                                                    | ADD1 ADD2 ARHGEF2 DMTN MAP1A MAP1B SPTBN2 SPTBN4 UPF1                                                                                                                                                 |
| GO:0022603 | regulation of anatomical structure morphogenesis                 |        | 4.9481 |                                                                                                                                                                    | ADD1 CAMK2B CORO1A CTTN CX3CR1 DMTN DPYSL2 EP300 GOLGA4 HTT KIF13B MAGI2 MAP1B MAP2 MYC PALMD PLEKH01 PLXNB3 PML PREX1 PTPRZ1 RAPGEF2 ROBO2 RTN4 SASH1 SHANK3 SP100 STRIP1 TGFB111 TIAM1 TMBIM1 WIPF3 |
| GO:0044344 | cellular response to fibroblast growth factor stimulus           | 4.9122 |        | BAD CTNNB1 GSK3B HHIP MTOR PDPK1 PRKAR1B PRKCE PSMD1 SPRED1 SPTBN1 SPTBN2 SPTBN4 TSC2                                                                              |                                                                                                                                                                                                       |
